# Supplementary material
Source: PubMed Central journal article supplement (PMC4191787)
Supplement: pnas.1414542111.sd01.pdf [file pnas.1414542111.sd01.pdf]

| Root Node          | Description                                           | GO_ID      | nGenes_root | nGenes_nodes | Rank Enrichment_DMS | P-Value_DMS | Permutation P-Value_DMS | FDR_DMS | Rank Enrichment_DLS | P-Value_DLS | Permutation P-Value_DLS | FDR_DLS |
|--------------------|-------------------------------------------------------|------------|-------------|--------------|---------------------|-------------|-------------------------|---------|---------------------|-------------|-------------------------|---------|
| biological_process | signaling                                             | GO:0023052 | 12849       | 3688         | 1.124814161         | 1.80E-50    | 0.018018018             | 0       | 1.103631035         | 1.99E-35    | 0.081081081             | 0       |
| biological_process | single organism signaling                             | GO:0044700 | 12849       | 3688         | 1.124814161         | 1.80E-50    | 0.018018018             | 0       | 1.103631035         | 1.99E-35    | 0.081081081             | 0       |
| biological_process | cell communication                                    | GO:0007154 | 12728       | 3809         | 1.121673243         | 5.02E-50    | 0.018018018             | 0       | 1.09834368          | 2.19E-33    | 0.086486486             | 0       |
| molecular_function | protein binding                                       | GO:0005515 | 7725        | 9136         | 1.059472893         | 3.07E-48    | 0.012612613             | 0       | 1.054305778         | 1.46E-40    | 0.037837838             | 0       |
| cellular_component | cell periphery                                        | GO:0071944 | 13652       | 3171         | 1.130333106         | 1.61E-45    | 0.03963964              | 0       | 1.08512878          | 1.52E-20    | 0.153153153             | 0       |
| biological_process | single-organism process                               | GO:0044699 | 7439        | 9098         | 1.05653556          | 2.08E-44    | 0.018018018             | 0       | 1.047440309         | 7.61E-32    | 0.082882883             | 0       |
| biological_process | single-multicellular organism process                 | GO:0044707 | 12313       | 4224         | 1.106766626         | 2.13E-44    | 0.009090909             | 0       | 1.084105815         | 2.60E-28    | 0.091891892             | 0       |
| cellular_component | plasma membrane                                       | GO:0005886 | 13748       | 3075         | 1.130781644         | 3.37E-44    | 0.036036036             | 0       | 1.085530739         | 5.07E-20    | 0.153153153             | 0       |
| biological_process | multicellular organismal process                      | GO:0032501 | 12190       | 4347         | 1.101539945         | 7.23E-42    | 0.005405405             | 0       | 1.081910078         | 6.11E-28    | 0.088288288             | 0       |
| biological_process | single-organism cellular process                      | GO:0044763 | 8262        | 8275         | 1.06008194          | 3.35E-41    | 0.01981982              | 0       | 1.05301004          | 1.61E-32    | 0.075675676             | 0       |
| biological_process | system development                                    | GO:0048731 | 13604       | 2933         | 1.129460962         | 3.51E-41    | 0.005405405             | 0       | 1.09895739          | 6.97E-25    | 0.090090909             | 0       |
| biological_process | single-organism developmental process                 | GO:0044767 | 13323       | 3214         | 1.116163701         | 2.67E-37    | 0.005405405             | 0       | 1.096638917         | 2.01E-26    | 0.059459459             | 0       |
| biological_process | signal transduction                                   | GO:0007165 | 13212       | 3325         | 1.113622177         | 3.11E-37    | 0.018018018             | 0       | 1.103009081         | 5.89E-31    | 0.068468468             | 0       |
| biological_process | anatomical structure development                      | GO:0048856 | 13107       | 3430         | 1.111034483         | 5.49E-37    | 0.005405405             | 0       | 1.093275165         | 1.10E-26    | 0.072072072             | 0       |
| biological_process | developmental process                                 | GO:0032502 | 12690       | 3847         | 1.103045783         | 6.58E-37    | 0.007207207             | 0       | 1.089782966         | 1.70E-28    | 0.07027027              | 0       |
| biological_process | multicellular organismal development                  | GO:0007275 | 13146       | 3391         | 1.111522977         | 8.64E-37    | 0.007207207             | 0       | 1.092000926         | 1.15E-25    | 0.091891892             | 0       |
| biological_process | response to stimulus                                  | GO:0050896 | 11144       | 5393         | 1.081351402         | 9.91E-37    | 0.009090909             | 0       | 1.059205208         | 2.29E-20    | 0.093693694             | 0       |
| biological_process | regulation of cell communication                      | GO:0010646 | 14778       | 1759         | 1.158312667         | 2.37E-34    | 0.014414414             | 0       | 1.132015192         | 1.75E-24    | 0.064864865             | 0       |
| biological_process | regulation of signaling                               | GO:0023051 | 14783       | 1754         | 1.157477731         | 6.58E-34    | 0.014414414             | 0       | 1.133642562         | 5.72E-25    | 0.064864865             | 0       |
| biological_process | regulation of multicellular organismal process        | GO:0051239 | 14857       | 1680         | 1.160577761         | 1.28E-33    | 0.003603604             | 0       | 1.114075756         | 6.47E-18    | 0.084684685             | 0       |
| biological_process | nervous system development                            | GO:0007399 | 15096       | 1441         | 1.173471104         | 3.75E-33    | 0.021621622             | 0       | 1.140380001         | 2.21E-22    | 0.113513514             | 0       |
| biological_process | anatomical structure morphogenesis                    | GO:0009653 | 14762       | 1775         | 1.153846701         | 7.31E-33    | 0.009090909             | 0       | 1.136057478         | 3.96E-26    | 0.075675676             | 0       |
| biological_process | cellular developmental process                        | GO:0048869 | 14039       | 2498         | 1.118358783         | 5.00E-29    | 0.001801802             | 0       | 1.106478397         | 7.30E-24    | 0.045045045             | 0       |
| biological_process | cell differentiation                                  | GO:0030154 | 14225       | 2312         | 1.123504135         | 7.00E-29    | 0.001801802             | 0       | 1.104903731         | 2.26E-21    | 0.055855856             | 0       |
| cellular_component | membrane                                              | GO:0016020 | 10364       | 6459         | 1.06161847          | 4.23E-28    | 0.082882883             | 0       | 1.040995674         | 1.79E-13    | 0.118918919             | 0       |
| biological_process | biological regulation                                 | GO:0065007 | 9127        | 7410         | 1.05401577          | 1.11E-27    | 0.073873874             | 0       | 1.05583386          | 1.92E-29    | 0.073873874             | 0       |
| biological_process | cell development                                      | GO:0048468 | 15136       | 1401         | 1.159084706         | 2.13E-27    | 0.001801802             | 0       | 1.129036792         | 1.12E-18    | 0.057657658             | 0       |
| biological_process | regulation of developmental process                   | GO:0050793 | 15202       | 1335         | 1.163049985         | 2.60E-27    | 0.003603604             | 0       | 1.124106517         | 1.29E-16    | 0.048648649             | 0       |
| biological_process | cellular response to stimulus                         | GO:0051716 | 12365       | 4172         | 1.082660838         | 5.40E-27    | 0.025225225             | 0       | 1.079933155         | 2.28E-25    | 0.063063063             | 0       |
| biological_process | regulation of signal transduction                     | GO:0009966 | 15000       | 1537         | 1.149022572         | 1.14E-26    | 0.012612613             | 0       | 1.131791246         | 2.81E-21    | 0.059459459             | 0       |
| biological_process | transmission of nerve impulse                         | GO:0019226 | 16037       | 500          | 1.267340031         | 3.71E-26    | 0.030630631             | 0       | 1.143796267         | 7.78E-09    | 0.183783784             | 0       |
| biological_process | multicellular organismal signaling                    | GO:0035637 | 16014       | 523          | 1.260155487         | 5.81E-26    | 0.037837838             | 0       | 1.150484759         | 6.92E-10    | 0.167567568             | 0       |
| biological_process | biological adhesion                                   | GO:0022610 | 15781       | 756          | 1.21194752          | 2.50E-25    | 0.021621622             | 0       | 1.148081247         | 2.62E-13    | 0.108108108             | 0       |
| cellular_component | neuron part                                           | GO:0097458 | 16011       | 812          | 1.202572505         | 5.99E-25    | 0.09090909              | 0       | 1.177616939         | 1.28E-19    | 0.073873874             | 0       |
| biological_process | cell adhesion                                         | GO:0007155 | 15787       | 750          | 1.210060847         | 1.01E-24    | 0.023423423             | 0       | 1.15082737          | 1.22E-13    | 0.100909091             | 0       |
| cellular_component | neuron projection                                     | GO:0043005 | 16103       | 720          | 1.214530491         | 1.09E-24    | 0.09090909              | 0       | 1.181515468         | 3.27E-18    | 0.090090909             | 0       |
| biological_process | regulation of response to stimulus                    | GO:0048583 | 14617       | 1920         | 1.126191652         | 1.13E-24    | 0.007207207             | 0       | 1.101249012         | 1.50E-16    | 0.073873874             | 0       |
| molecular_function | binding                                               | GO:0005488 | 4551        | 12310        | 1.027493776         | 1.33E-24    | 0.075675676             | 0       | 1.025489643         | 2.05E-21    | 0.093693694             | 0       |
| biological_process | regulation of biological process                      | GO:0050789 | 9462        | 7075         | 1.052486536         | 2.53E-24    | 0.091891892             | 0       | 1.057722166         | 5.17E-29    | 0.072072072             | 0       |
| biological_process | neurogenesis                                          | GO:0022008 | 15568       | 969          | 1.181631341         | 2.96E-24    | 0.007207207             | 0       | 1.141364934         | 1.99E-15    | 0.108108108             | 0       |
| cellular_component | cell junction                                         | GO:0030054 | 16146       | 677          | 1.217079231         | 8.75E-24    | 0.054054054             | 0       | 1.191953333         | 5.22E-19    | 0.100909091             | 0       |
| biological_process | organ development                                     | GO:0048513 | 14341       | 2196         | 1.114316569         | 1.10E-23    | 0.007207207             | 0       | 1.094133366         | 1.16E-16    | 0.088288288             | 0       |
| biological_process | regulation of multicellular organismal development    | GO:2000026 | 15477       | 1060         | 1.170527109         | 1.39E-23    | 0.001801802             | 0       | 1.129637724         | 2.07E-14    | 0.054054054             | 0       |
| cellular_component | plasma membrane part                                  | GO:0044459 | 15528       | 1295         | 1.15301424          | 1.58E-23    | 0.012612613             | 0       | 1.078089061         | 2.03E-07    | 0.207207207             | 0       |
| biological_process | positive regulation of biological process             | GO:0048518 | 13602       | 2935         | 1.095299517         | 3.10E-23    | 0.007207207             | 0       | 1.080536091         | 3.96E-17    | 0.064864865             | 0       |
| biological_process | cell surface receptor signaling pathway               | GO:0007166 | 14722       | 1815         | 1.12568573          | 4.21E-23    | 0.014414414             | 0       | 1.099739888         | 3.08E-15    | 0.109909091             | 0       |
| cellular_component | synapse                                               | GO:0045202 | 16321       | 502          | 1.249335239         | 4.44E-23    | 0.081081081             | 0       | 1.213141431         | 2.27E-17    | 0.104054050             | 0       |
| biological_process | regulation of biological quality                      | GO:0065008 | 14585       | 1952         | 1.119872457         | 7.76E-23    | 0.014414414             | 0       | 1.094087245         | 8.82E-15    | 0.043243243             | 0       |
| cellular_component | cell projection                                       | GO:0042995 | 15588       | 1235         | 1.154405066         | 8.03E-23    | 0.030630631             | 0       | 1.118193042         | 3.88E-14    | 0.113513514             | 0       |
| biological_process | regulation of cellular process                        | GO:0050794 | 9823        | 6714         | 1.052970643         | 8.87E-23    | 0.100909091             | 0       | 1.06060422          | 3.22E-29    | 0.077477477             | 0       |
| biological_process | generation of neurons                                 | GO:0048699 | 15641       | 896          | 1.180688439         | 2.91E-22    | 0.010810811             | 0       | 1.146088625         | 3.40E-15    | 0.108108108             | 0       |
| biological_process | system process                                        | GO:0003008 | 15335       | 1202         | 1.154165197         | 3.50E-22    | 0.036036036             | 0       | 1.095529307         | 1.28E-09    | 0.171171171             | 0       |
| biological_process | cellular component morphogenesis                      | GO:0032989 | 15721       | 816          | 1.186287035         | 1.64E-21    | 0.018018018             | 0       | 1.15572304          | 1.37E-15    | 0.102702703             | 0       |
| biological_process | neuron projection development                         | GO:0031175 | 16010       | 527          | 1.233786191         | 1.73E-21    | 0.028828829             | 0       | 1.177993619         | 3.17E-13    | 0.136936937             | 0       |
| biological_process | locomotion                                            | GO:0040011 | 15634       | 903          | 1.175978098         | 2.25E-21    | 0.012612613             | 0       | 1.130165135         | 1.61E-12    | 0.106306306             | 0       |
| biological_process | cell morphogenesis                                    | GO:0000902 | 15775       | 762          | 1.192041122         | 2.70E-21    | 0.01981982              | 0       | 1.16270907          | 8.25E-16    | 0.113513514             | 0       |
| biological_process | regulation of cell differentiation                    | GO:0045595 | 15593       | 944          | 1.171270209         | 3.11E-21    | 0.001801802             | 0       | 1.130494694         | 4.29E-13    | 0.050450405             | 0       |
| biological_process | cellular component movement                           | GO:0006928 | 15575       | 962          | 1.167632933         | 8.52E-21    | 0.009090909             | 0       | 1.114926071         | 9.97E-11    | 0.111717172             | 0       |
| biological_process | neuron differentiation                                | GO:0030182 | 15726       | 811          | 1.183341506         | 8.99E-21    | 0.023423423             | 0       | 1.147035953         | 5.14E-14    | 0.117171717             | 0       |
| biological_process | neuron projection morphogenesis                       | GO:0048812 | 16161       | 376          | 1.270817012         | 1.77E-20    | 0.034234234             | 0       | 1.195709274         | 1.47E-11    | 0.153153153             | 0       |
| biological_process | synaptic transmission                                 | GO:0007268 | 16133       | 404          | 1.260701113         | 1.98E-20    | 0.043243243             | 0       | 1.151465375         | 4.68E-08    | 0.165765766             | 0       |
| biological_process | cell morphogenesis involved in differentiation        | GO:0000904 | 16047       | 490          | 1.235372977         | 2.57E-20    | 0.01981982              | 0       | 1.181739978         | 7.54E-13    | 0.131531532             | 0       |
| biological_process | localization                                          | GO:0051179 | 12788       | 3749         | 1.075938483         | 2.65E-20    | 0.050450405             | 0       | 1.061106406         | 8.58E-14    | 0.118918919             | 0       |
| biological_process | neuron development                                    | GO:0048666 | 15911       | 626          | 1.205914905         | 4.62E-20    | 0.027027027             | 0       | 1.15696561          | 2.03E-12    | 0.136936937             | 0       |
| biological_process | positive regulation of cellular process               | GO:0048522 | 13874       | 2663         | 1.092179868         | 1.18E-19    | 0.007207207             | 0       | 1.083524208         | 1.81E-16    | 0.064864865             | 0       |
| cellular_component | membrane part                                         | GO:0044425 | 11904       | 4919         | 1.061903831         | 1.95E-19    | 0.100909091             | 0       | 1.033896604         | 4.91E-07    | 0.209090909             | 0       |
| biological_process | cell migration                                        | GO:0016477 | 15836       | 701          | 1.190427106         | 2.25E-19    | 0.007207207             | 0       | 1.144967305         | 5.47E-12    | 0.095495495             | 0       |
| molecular_function | protein tyrosine kinase activity                      | GO:0004713 | 16401       | 460          | 1.235242884         | 3.97E-19    | 0.005405405             | 0       | 1.206018419         | 4.25E-15    | 0.055855856             | 0       |
| biological_process | cell morphogenesis involved in neuron differentiation | GO:0048667 | 16171       | 366          | 1.262841815         | 6.39E-19    | 0.034234234             | 0       | 1.198548538         | 1.43E-11    | 0.136936937             | 0       |
| biological_process | neurological system process                           | GO:0050877 | 15662       | 875          | 1.167255046         | 6.52E-19    | 0.064864865             | 0       | 1.08022817          | 1.20E-05    | 0.248648649             | 0       |
| biological_process | intracellular signal transduction                     | GO:0035556 | 14889       | 1648         | 1.118661589         | 7.28E-19    | 0.028828829             | 0       | 1.107712952         | 7.21E-16    | 0.090090909             | 0       |
| biological_process | protein phosphorylation                               | GO:0006468 | 15448       | 1089         | 1.146274495         | 2.56E-18    | 0.012612613             | 0       | 1.114713939         | 5.85E-12    | 0.106306306             | 0       |
| biological_process | response to chemical stimulus                         | GO:0042221 | 14344       | 2193         | 1.098580411         | 4.53E-18    | 0.016216216             | 0       | 1.068068425         | 1.53E-09    | 0.117171717             | 0       |
| biological_process | cardiovascular system development                     | GO:0072358 | 15828       | 709          | 1.181375157         | 6.14E-18    | 0.016216216             | 0       | 1.125641466         | 1.58E-09    | 0.131531532             | 0       |
| biological_process | circulatory system development                        | GO:0072359 | 15828       | 709          | 1.181375157         | 6.14E-18    | 0.016216216             | 0       | 1.125641466         | 1.58E-09    | 0.131531532             | 0       |
| biological_process | regulation of cell development                        | GO:0060284 | 15905       | 632          | 1.192106985         | 7.34E-18    | 0.001801802             | 0       | 1.159328511         | 7.52E-13    | 0.052252252             | 0       |
| biological_process | cell motility                                         | GO:0048870 | 15778       | 759          | 1.173372172         | 1.23E-17    | 0.009090909             | 0       | 1.128806635         | 1.56E-10    | 0.099090909             | 0       |
| biological_process | localization of cell                                  | GO:0051674 | 15778       | 759          | 1.173372172         | 1.23E-17    | 0.009090909             | 0       | 1.128806635         | 1.56E-10    | 0.099090909             | 0       |
| biological_process | cell-cell signaling                                   | GO:0007267 | 15886       | 651          |                     |             |                         |         |                     |             |                         |         |

|                    |                                                                  |            |       |      |             |          |             |   |             |             |             |            |
|--------------------|------------------------------------------------------------------|------------|-------|------|-------------|----------|-------------|---|-------------|-------------|-------------|------------|
| biological_process | regulation of phosphorus metabolic process                       | GO:0051174 | 15482 | 1055 | 1.144626058 | 2.07E-17 | 0.027027027 | 0 | 1.118437827 | 2.86E-12    | 0.082882883 | 0          |
| biological_process | positive regulation of metabolic process                         | GO:0009893 | 14864 | 1673 | 1.112484446 | 2.13E-17 | 0.007207207 | 0 | 1.111024274 | 5.38E-17    | 0.043243243 | 0          |
| biological_process | axonogenesis                                                     | GO:0007409 | 16225 | 312  | 1.268838062 | 5.05E-17 | 0.016216216 | 0 | 1.173525009 | 4.17E-08    | 0.171171171 | 0          |
| biological_process | regulation of nervous system development                         | GO:0051960 | 16090 | 447  | 1.222545425 | 7.16E-17 | 0.003603604 | 0 | 1.183946644 | 4.27E-12    | 0.079279279 | 0          |
| biological_process | positive regulation of cellular metabolic process                | GO:0031325 | 14964 | 1573 | 1.114407269 | 7.17E-17 | 0.005405405 | 0 | 1.109902035 | 1.04E-15    | 0.045045045 | 0          |
| biological_process | enzyme linked receptor protein signaling pathway                 | GO:0007167 | 16004 | 533  | 1.201947904 | 1.12E-16 | 0.005405405 | 0 | 1.17237693  | 1.22E-12    | 0.057657658 | 0          |
| biological_process | positive regulation of macromolecule metabolic process           | GO:0010604 | 14987 | 1550 | 1.114207928 | 1.41E-16 | 0.007207207 | 0 | 1.115791774 | 5.47E-17    | 0.041441441 | 0          |
| biological_process | regulation of system process                                     | GO:0044057 | 16112 | 425  | 1.225900926 | 1.52E-16 | 0.016216216 | 0 | 1.125520008 | 2.80E-06    | 0.165765766 | 0          |
| biological_process | regulation of anatomical structure morphogenesis                 | GO:0022603 | 15992 | 545  | 1.197930123 | 2.00E-16 | 0.007207207 | 0 | 1.153058059 | 1.55E-10    | 0.082882883 | 0          |
| biological_process | central nervous system development                               | GO:0007417 | 15880 | 657  | 1.178432882 | 3.13E-16 | 0.014414414 | 0 | 1.148030036 | 9.97E-12    | 0.097297297 | 0          |
| cellular_component | intrinsic to membrane                                            | GO:0031224 | 12607 | 4216 | 1.062155047 | 3.38E-16 | 0.118918919 | 0 | 1.038664263 | 2.54E-07    | 0.205405405 | 0          |
| molecular_function | protein kinase activity                                          | GO:0004672 | 16283 | 578  | 1.190388518 | 3.58E-16 | 0.007207207 | 0 | 1.163553526 | 2.10E-12    | 0.045045045 | 0          |
| biological_process | cell projection organization                                     | GO:0030030 | 15762 | 775  | 1.163202586 | 3.80E-16 | 0.034234234 | 0 | 1.146470001 | 2.34E-13    | 0.118918919 | 0          |
| biological_process | vasculature development                                          | GO:0001944 | 16054 | 483  | 1.206781187 | 6.81E-16 | 0.010810811 | 0 | 1.137247888 | 5.71E-08    | 0.126126126 | 0          |
| cellular_component | synapse part                                                     | GO:0044456 | 16458 | 365  | 1.237886529 | 8.68E-16 | 0.099099099 | 0 | 1.188654811 | 1.38E-10    | 0.135135135 | 0          |
| biological_process | cellular component organization                                  | GO:0016043 | 13119 | 3418 | 1.069767092 | 1.08E-15 | 0.018018018 | 0 | 1.068358908 | 3.88E-15    | 0.05045045  | 0          |
| biological_process | phosphorylation                                                  | GO:0016310 | 15318 | 1219 | 1.125985894 | 1.23E-15 | 0.007207207 | 0 | 1.097136337 | 5.19E-10    | 0.104504505 | 0          |
| cellular_component | dendrite                                                         | GO:0030425 | 16439 | 384  | 1.230023619 | 1.42E-15 | 0.127927928 | 0 | 1.20098213  | 2.58E-12    | 0.084684685 | 0          |
| biological_process | anatomical structure formation involved in morphogenesis         | GO:0048646 | 15754 | 783  | 1.15902968  | 1.43E-15 | 0.014414414 | 0 | 1.117193927 | 2.95E-09    | 0.108108108 | 0          |
| cellular_component | integral to membrane                                             | GO:0016021 | 12715 | 4108 | 1.061404481 | 2.23E-15 | 0.126126126 | 0 | 1.041231707 | 7.01E-08    | 0.194594595 | 0          |
| biological_process | blood vessel development                                         | GO:0001568 | 16079 | 458  | 1.206572857 | 4.07E-15 | 0.018018018 | 0 | 1.141265852 | 5.47E-08    | 0.122522523 | 0          |
| cellular_component | intrinsic to plasma membrane                                     | GO:0031226 | 16264 | 559  | 1.186301067 | 4.26E-15 | 0.030630631 | 0 | 1.134683833 | 1.01E-08    | 0.14954955  | 0          |
| biological_process | regulation of transmission of nerve impulse                      | GO:0051969 | 16331 | 206  | 1.308987355 | 5.39E-15 | 0.023423423 | 0 | 1.151262404 | 7.72E-05    | 0.189189189 | 0.00597424 |
| biological_process | regulation of synaptic transmission                              | GO:0050804 | 16350 | 187  | 1.324156251 | 5.74E-15 | 0.030630631 | 0 | 1.170207905 | 2.51E-05    | 0.171171171 | 0.00331208 |
| molecular_function | signal transducer activity                                       | GO:0004871 | 15873 | 988  | 1.137254703 | 6.71E-15 | 0.030630631 | 0 | 0.097086981 | 2.55E-08    | 0.104504505 | 0          |
| molecular_function | molecular transducer activity                                    | GO:0060089 | 15873 | 988  | 1.137254703 | 6.71E-15 | 0.030630631 | 0 | 0.097086981 | 2.55E-08    | 0.104504505 | 0          |
| biological_process | tissue development                                               | GO:0009888 | 15311 | 1226 | 1.12174677  | 8.35E-15 | 0.007207207 | 0 | 1.123384212 | 3.73E-15    | 0.063063063 | 0          |
| biological_process | regulation of neurogenesis                                       | GO:0050767 | 16138 | 399  | 1.218829915 | 9.00E-15 | 0.003603604 | 0 | 1.199056144 | 1.57E-12    | 0.066666667 | 0          |
| biological_process | regulation of cell morphogenesis                                 | GO:0022604 | 16258 | 279  | 1.26171881  | 1.12E-14 | 0.018018018 | 0 | 1.222452101 | 4.27E-11    | 0.068468468 | 0          |
| biological_process | regulation of localization                                       | GO:0032879 | 15328 | 1209 | 1.122015524 | 1.15E-14 | 0.048648649 | 0 | 1.105700936 | 1.90E-11    | 0.093693694 | 0          |
| molecular_function | receptor activity                                                | GO:0004872 | 15968 | 893  | 1.143251331 | 1.28E-14 | 0.037837838 | 0 | 1.185585586 | 3.23E-06    | 0.185585586 | 0          |
| biological_process | regulation of neurological system process                        | GO:0031644 | 16314 | 223  | 1.291960243 | 1.45E-14 | 0.025225225 | 0 | 1.140814425 | 0.00012268  | 0.201801802 | 0.00831865 |
| molecular_function | GTPase regulator activity                                        | GO:0030695 | 16468 | 393  | 1.218731002 | 1.48E-14 | 0.03963964  | 0 | 1.239290064 | 4.62E-17    | 0.025225225 | 0          |
| biological_process | tissue morphogenesis                                             | GO:0048729 | 16085 | 452  | 1.203477992 | 1.51E-14 | 0.003603604 | 0 | 1.202661955 | 1.91E-14    | 0.03963964  | 0          |
| cellular_component | cell projection part                                             | GO:0044463 | 16196 | 627  | 1.171538441 | 1.69E-14 | 0.024324324 | 0 | 1.164337515 | 1.88E-13    | 0.066666667 | 0          |
| biological_process | phosphate-containing compound metabolic process                  | GO:0006796 | 14163 | 2374 | 1.083072547 | 1.79E-14 | 0.037837838 | 0 | 1.063205545 | 4.12E-09    | 0.104504505 | 0          |
| molecular_function | phosphotransferase activity, alcohol group as acceptor           | GO:0016773 | 16169 | 692  | 1.162473671 | 2.02E-14 | 0.016216216 | 0 | 1.142911597 | 1.47E-11    | 0.063063063 | 0          |
| biological_process | transmembrane receptor protein tyrosine kinase signaling pathway | GO:0007169 | 16202 | 335  | 1.234465475 | 2.97E-14 | 0.001801802 | 0 | 1.150638352 | 7.01E-07    | 0.100909091 | 0          |
| cellular_component | integral to plasma membrane                                      | GO:0005887 | 16298 | 525  | 1.185780588 | 3.42E-14 | 0.034234234 | 0 | 1.138186423 | 1.26E-08    | 0.145945946 | 0          |
| biological_process | negative regulation of biological process                        | GO:0048519 | 13836 | 2701 | 1.075551517 | 5.24E-14 | 0.016216216 | 0 | 1.079787118 | 2.05E-15    | 0.030630631 | 0          |
| cellular_component | anchoring junction                                               | GO:0070161 | 16622 | 201  | 1.298341376 | 8.50E-14 | 0.005405405 | 0 | 1.190393184 | 1.28E-06    | 0.118918919 | 0          |
| biological_process | positive regulation of cell communication                        | GO:0010647 | 15800 | 737  | 1.152676673 | 1.03E-13 | 0.001801802 | 0 | 1.096556401 | 1.70E-06    | 0.140540541 | 0          |
| biological_process | response to organic substance                                    | GO:0010033 | 14925 | 1612 | 1.100109364 | 1.17E-13 | 0.018018018 | 0 | 1.077010368 | 8.64E-09    | 0.093693694 | 0          |
| biological_process | phosphorus metabolic process                                     | GO:0006793 | 14121 | 2416 | 1.079521227 | 1.18E-13 | 0.043243243 | 0 | 1.059073569 | 2.63E-08    | 0.120720721 | 0          |
| molecular_function | cytoskeletal protein binding                                     | GO:0008092 | 16266 | 595  | 1.170126206 | 1.26E-13 | 0.014414414 | 0 | 1.153008496 | 2.32E-11    | 0.066666667 | 0          |
| biological_process | cell projection morphogenesis                                    | GO:0048858 | 16052 | 485  | 1.188170396 | 1.60E-13 | 0.043243243 | 0 | 1.156488179 | 6.86E-10    | 0.147747748 | 0          |
| biological_process | negative regulation of developmental process                     | GO:0051093 | 16049 | 488  | 1.187398488 | 1.69E-13 | 0.001801802 | 0 | 1.102278789 | 3.56E-05    | 0.075675676 | 0.0032691  |
| biological_process | intracellular protein kinase cascade                             | GO:0007243 | 15787 | 750  | 1.149908272 | 1.70E-13 | 0.003603604 | 0 | 1.098553242 | 8.57E-07    | 0.106306306 | 0          |
| biological_process | negative regulation of cellular process                          | GO:0048523 | 14079 | 2458 | 1.078123238 | 1.79E-13 | 0.012612613 | 0 | 1.080411046 | 3.61E-14    | 0.037837838 | 0          |
| cellular_component | adherens junction                                                | GO:0005912 | 16634 | 189  | 1.303461113 | 1.84E-13 | 0.003603604 | 0 | 1.219535862 | 7.31E-08    | 0.081081081 | 0          |
| biological_process | regulation of neuron differentiation                             | GO:0045664 | 16208 | 329  | 1.228582924 | 2.02E-13 | 0.016216216 | 0 | 1.209998005 | 1.33E-11    | 0.079279279 | 0          |
| biological_process | regulation of cellular component organization                    | GO:0051128 | 15401 | 1136 | 1.119363475 | 2.58E-13 | 0.030630631 | 0 | 1.126251178 | 1.11E-14    | 0.046846847 | 0          |
| molecular_function | kinase activity                                                  | GO:0016301 | 16087 | 774  | 1.145844315 | 3.12E-13 | 0.010810811 | 0 | 1.134210118 | 1.78E-11    | 0.054054054 | 0          |
| biological_process | regulation of molecular function                                 | GO:0065009 | 15088 | 1449 | 1.104054883 | 3.42E-13 | 0.01981982  | 0 | 1.079651085 | 1.93E-08    | 0.117171717 | 0          |
| biological_process | regulation of small GTPase mediated signal transduction          | GO:0051056 | 16213 | 324  | 1.227928086 | 3.57E-13 | 0.028828829 | 0 | 1.233859078 | 8.95E-14    | 0.05045045  | 0          |
| biological_process | blood vessel morphogenesis                                       | GO:0048514 | 16138 | 399  | 1.203711648 | 4.85E-13 | 0.012612613 | 0 | 1.137158542 | 7.79E-07    | 0.122522523 | 0          |
| biological_process | positive regulation of signaling                                 | GO:0023056 | 15802 | 735  | 1.148341625 | 5.17E-13 | 0.001801802 | 0 | 1.095622624 | 2.18E-06    | 0.142342342 | 0          |
| molecular_function | nucleoside-triphosphatase regulator activity                     | GO:0060589 | 16455 | 406  | 1.20093469  | 6.29E-13 | 0.046846847 | 0 | 1.228022169 | 3.95E-16    | 0.027027027 | 0          |
| biological_process | MAPK cascade                                                     | GO:0000165 | 16085 | 452  | 1.189388645 | 7.67E-13 | 0.007207207 | 0 | 1.108710679 | 2.46E-05    | 0.147747748 | 0.00332307 |
| biological_process | tube morphogenesis                                               | GO:0035239 | 16257 | 280  | 1.241845414 | 7.77E-13 | 0.005405405 | 0 | 1.199976333 | 2.52E-09    | 0.07027027  | 0          |
| biological_process | negative regulation of cell differentiation                      | GO:0045596 | 16141 | 396  | 1.202609309 | 7.83E-13 | 0.001801802 | 0 | 1.090610981 | 0.000785594 | 0.104504505 | 0.0328093  |
| biological_process | positive regulation of response to stimulus                      | GO:0048584 | 15600 | 937  | 1.129259052 | 8.57E-13 | 0.001801802 | 0 | 1.060964249 | 0.000437592 | 0.172972973 | 0.0201478  |
| biological_process | regulation of cellular component movement                        | GO:0051270 | 16107 | 430  | 1.193767718 | 8.83E-13 | 0.01981982  | 0 | 1.126500285 | 2.08E-06    | 0.136936937 | 0          |
| biological_process | regulation of transcription from RNA polymerase II promoter      | GO:0006357 | 15435 | 1102 | 1.117399507 | 1.41E-12 | 0.007207207 | 0 | 1.128384529 | 1.08E-14    | 0.036036036 | 0          |
| biological_process | embryo development                                               | GO:0009790 | 15685 | 852  | 1.134419192 | 1.50E-12 | 0.014414414 | 0 | 1.142292677 | 7.53E-14    | 0.064848485 | 0          |
| biological_process | tube development                                                 | GO:0035295 | 16121 | 416  | 1.194691368 | 1.63E-12 | 0.007207207 | 0 | 1.155434328 | 1.34E-08    | 0.099099099 | 0          |
| biological_process | cell part morphogenesis                                          | GO:0032990 | 16038 | 499  | 1.177015075 | 1.77E-12 | 0.048648649 | 0 | 1.150099381 | 1.85E-09    | 0.140540541 | 0          |
| biological_process | regulation of MAPK cascade                                       | GO:0043408 | 16138 | 399  | 1.198446927 | 1.82E-12 | 0.009090909 | 0 | 1.096401659 | 0.000367448 | 0.205405405 | 0.0139241  |
| molecular_function | actin binding                                                    | GO:0003779 | 16524 | 337  | 1.215607869 | 2.18E-12 | 0.005405405 | 0 | 1.145128207 | 1.57E-06    | 0.106306306 | 0          |
| biological_process | positive regulation of phosphorus metabolic process              | GO:0010562 | 16028 | 509  | 1.174335744 | 2.26E-12 | 0.005405405 | 0 | 1.12218919  | 6.17E-07    | 0.122522523 | 0          |
| biological_process | positive regulation of phosphate metabolic process               | GO:0045937 | 16028 | 509  | 1.174335744 | 2.26E-12 | 0.005405405 | 0 | 1.12218919  | 6.17E-07    | 0.122522523 | 0          |
| molecular_function | small GTPase regulator activity                                  | GO:0005083 | 16595 | 266  | 1.24246171  | 2.53E-12 | 0.054054054 | 0 | 1.254389592 | 2.18E-13    | 0.036036036 | 0          |
| cellular_component | dendritic spine                                                  | GO:0043197 | 16659 | 164  | 1.309591822 | 2.58E-12 | 0.073873874 | 0 | 1.273116616 | 5.72E-10    | 0.073873874 | 0          |
| cellular_component | neuron spine                                                     | GO:0044309 | 16659 | 164  | 1.309591822 | 2.58E-12 | 0.073873874 | 0 | 1.273116616 | 5.72E-10    | 0.073873874 | 0          |
| biological_process | brain development                                                | GO:0007420 | 16028 | 509  | 1.173613466 | 2.77E-12 | 0.014414414 | 0 | 1.121393259 | 7.23E-07    | 0.169369369 | 0          |
| biological_process | Ras protein signal transduction                                  | GO:0007265 | 16183 | 354  | 1.209029205 | 2.87E-12 | 0.01981982  | 0 | 1.216650781 | 4.76E-13    | 0.03963964  | 0          |
| biological_process | immune system process                                            | GO:0002376 | 15345 | 1192 | 1.110543489 | 3.39E-12 | 0.003603604 | 0 | 1.063722143 | 3.81E-05    | 0.023423423 | 0.00324795 |
| biological_process | epithelial tube morphogenesis                                    | GO:0060562 | 16271 | 266  | 1.240037315 | 4.07E-12 | 0.003603604 | 0 | 1.202565958 | 3.99E-09    | 0.084684685 | 0          |
| cellular_component | actin cytoskeleton                                               | GO:0015629 | 164   |      |             |          |             |   |             |             |             |            |

|                    |                                                                         |            |       |      |             |          |             |   |             |             |             |            |
|--------------------|-------------------------------------------------------------------------|------------|-------|------|-------------|----------|-------------|---|-------------|-------------|-------------|------------|
| biological_process | behavior                                                                | GO:0007610 | 16055 | 482  | 1.174201475 | 8.90E-12 | 0.081081081 | 0 | 1.142648237 | 1.84E-08    | 0.145945946 | 0          |
| molecular_function | anion binding                                                           | GO:0043168 | 14272 | 2589 | 1.070064405 | 9.61E-12 | 0.082882883 | 0 | 1.073999745 | 6.78E-13    | 0.106306306 | 0          |
| biological_process | synapse organization                                                    | GO:0050808 | 16417 | 120  | 1.352082522 | 1.01E-11 | 0.01981982  | 0 | 1.266078286 | 2.02E-07    | 0.117171717 | 0          |
| biological_process | organ morphogenesis                                                     | GO:0009887 | 15818 | 719  | 1.140264728 | 1.36E-11 | 0.009090909 | 0 | 1.139464108 | 1.76E-11    | 0.093693694 | 0          |
| biological_process | cell-cell adhesion                                                      | GO:0016337 | 16214 | 323  | 1.211534116 | 1.46E-11 | 0.055855856 | 0 | 1.195674163 | 3.84E-10    | 0.091891892 | 0          |
| biological_process | regulation of catalytic activity                                        | GO:0050790 | 15431 | 1106 | 1.110985524 | 1.82E-11 | 0.023423423 | 0 | 1.074321525 | 4.67E-06    | 0.151351351 | 0          |
| molecular_function | nucleic acid binding transcription factor activity                      | GO:0001071 | 16150 | 711  | 1.140230486 | 1.83E-11 | 0.03603604  | 0 | 1.116606917 | 1.87E-08    | 0.090090909 | 0          |
| biological_process | cellular component organization or biogenesis                           | GO:0071840 | 12973 | 3564 | 1.05663884  | 1.90E-11 | 0.023423423 | 0 | 1.055763391 | 3.76E-11    | 0.048648649 | 0          |
| molecular_function | protein serine/threonine kinase activity                                | GO:0004674 | 16449 | 412  | 1.185664969 | 1.94E-11 | 0.005405405 | 0 | 1.167795744 | 0.052252252 | 0.117E-09   | 0          |
| cellular_component | cytoskeleton                                                            | GO:0005856 | 15262 | 1561 | 1.091871417 | 2.04E-11 | 0.037837838 | 0 | 1.095222234 | 3.92E-12    | 0.048648649 | 0          |
| molecular_function | sequence-specific DNA binding transcription factor activity             | GO:0003700 | 16152 | 709  | 1.139980645 | 2.11E-11 | 0.03603604  | 0 | 1.114819941 | 3.14E-08    | 0.093693694 | 0          |
| biological_process | regulation of locomotion                                                | GO:0040012 | 16123 | 414  | 1.184776456 | 2.13E-11 | 0.023423423 | 0 | 1.122974504 | 5.69E-06    | 0.136936937 | 0          |
| molecular_function | signaling receptor activity                                             | GO:0038023 | 16120 | 741  | 1.136571615 | 2.26E-11 | 0.045045045 | 0 | 1.099896964 | 7.28E-07    | 0.140540541 | 0          |
| biological_process | positive regulation of signal transduction                              | GO:0009967 | 15847 | 690  | 1.141688896 | 2.27E-11 | 0.001801802 | 0 | 1.092184822 | 9.16E-06    | 0.140540541 | 0          |
| biological_process | actin filament-based process                                            | GO:0030029 | 16119 | 418  | 1.183530217 | 2.31E-11 | 0.030630631 | 0 | 1.165037151 | 1.61E-09    | 0.077477477 | 0          |
| biological_process | positive regulation of macromolecule biosynthetic process               | GO:0010557 | 15491 | 1046 | 1.113161703 | 2.88E-11 | 0.007207207 | 0 | 1.114468161 | 1.73E-11    | 0.043243243 | 0          |
| biological_process | transcription from RNA polymerase II promoter                           | GO:0006366 | 15389 | 1148 | 1.107399454 | 3.21E-11 | 0.007207207 | 0 | 1.122094832 | 5.54E-14    | 0.021621622 | 0          |
| biological_process | angiogenesis                                                            | GO:0001525 | 16214 | 323  | 1.207475525 | 3.46E-11 | 0.005405405 | 0 | 1.126528366 | 3.48E-05    | 0.106306306 | 0.0032798  |
| biological_process | regulation of synaptic plasticity                                       | GO:0048167 | 16442 | 95   | 1.384859881 | 3.61E-11 | 0.028828829 | 0 | 1.255976053 | 7.32E-06    | 0.082882883 | 0          |
| biological_process | positive regulation of biosynthetic process                             | GO:0009891 | 15401 | 1136 | 1.107621379 | 3.75E-11 | 0.005405405 | 0 | 1.107482987 | 3.96E-11    | 0.055855856 | 0          |
| biological_process | axon guidance                                                           | GO:0007411 | 16406 | 131  | 1.327015333 | 3.79E-11 | 0.03603604  | 0 | 1.212811164 | 1.14E-05    | 0.138738739 | 0          |
| biological_process | positive regulation of transcription, DNA-dependent                     | GO:0045893 | 15623 | 914  | 1.120608391 | 4.08E-11 | 0.009090909 | 0 | 1.129307965 | 1.63E-12    | 0.054054054 | 0          |
| biological_process | establishment of localization                                           | GO:0051234 | 13469 | 3068 | 1.0610619   | 4.27E-11 | 0.099099099 | 0 | 1.046859644 | 3.16E-07    | 0.16036036  | 0          |
| biological_process | positive regulation of cellular biosynthetic process                    | GO:0031328 | 15421 | 1116 | 1.108214976 | 4.45E-11 | 0.005405405 | 0 | 1.109569524 | 2.59E-11    | 0.052252252 | 0          |
| biological_process | positive regulation of transcription from RNA polymerase II promoter    | GO:0045944 | 15892 | 645  | 1.144474454 | 4.50E-11 | 0.005405405 | 0 | 1.142263893 | 8.64E-11    | 0.045045045 | 0          |
| biological_process | regulation of cell migration                                            | GO:0030334 | 16168 | 369  | 1.192373269 | 4.80E-11 | 0.01981982  | 0 | 1.117479395 | 3.86E-05    | 0.158558559 | 0.00323745 |
| biological_process | cellular response to organic substance                                  | GO:0071310 | 15543 | 994  | 1.114887457 | 4.86E-11 | 0.010810811 | 0 | 1.097953046 | 1.72E-08    | 0.086486486 | 0          |
| molecular_function | phospholipid binding                                                    | GO:0005543 | 16406 | 455  | 1.172531221 | 5.16E-11 | 0.066666667 | 0 | 1.20416489  | 1.03E-14    | 0.052252252 | 0          |
| biological_process | positive regulation of phosphorylation                                  | GO:0042327 | 16093 | 444  | 1.174492565 | 5.39E-11 | 0.010810811 | 0 | 1.12122985  | 3.64E-06    | 0.131531532 | 0          |
| molecular_function | transmembrane signaling receptor activity                               | GO:0004888 | 16206 | 655  | 1.142722838 | 5.47E-11 | 0.048648649 | 0 | 1.097515237 | 5.19E-06    | 0.16036036  | 0          |
| cellular_component | cell leading edge                                                       | GO:0031252 | 16573 | 250  | 1.233704895 | 5.65E-11 | 0.010810811 | 0 | 1.231934084 | 6.45E-10    | 0.046846847 | 0          |
| biological_process | single-organism behavior                                                | GO:0044708 | 16204 | 333  | 1.201942406 | 5.66E-11 | 0.097297297 | 0 | 1.13419394  | 9.14E-06    | 0.201801802 | 0          |
| biological_process | positive regulation of protein modification process                     | GO:0031401 | 16013 | 524  | 1.159953309 | 5.78E-11 | 0.007207207 | 0 | 1.129740578 | 8.59E-08    | 0.090090909 | 0          |
| biological_process | positive regulation of gene expression                                  | GO:0010628 | 15544 | 993  | 1.114090848 | 6.68E-11 | 0.010810811 | 0 | 1.122738909 | 2.43E-12    | 0.059459459 | 0          |
| biological_process | ion homeostasis                                                         | GO:0050801 | 15939 | 598  | 1.148875099 | 6.69E-11 | 0.034234234 | 0 | 1.079400736 | 0.000306831 | 0.154954955 | 0.0142827  |
| biological_process | regulation of Ras protein signal transduction                           | GO:0046578 | 16244 | 293  | 1.214627332 | 6.79E-11 | 0.027027027 | 0 | 1.220492425 | 2.11E-11    | 0.045045045 | 0          |
| biological_process | regulation of phosphorylation                                           | GO:0042325 | 15838 | 699  | 1.136994208 | 7.26E-11 | 0.009090909 | 0 | 1.087509881 | 2.11E-05    | 0.138738739 | 0          |
| biological_process | regulation of cell motility                                             | GO:2000145 | 16152 | 385  | 1.186340631 | 7.38E-11 | 0.018018018 | 0 | 1.107981676 | 0.000102288 | 0.163963964 | 0.00857888 |
| biological_process | positive regulation of protein phosphorylation                          | GO:0001934 | 16110 | 427  | 1.176118631 | 8.48E-11 | 0.010810811 | 0 | 1.121548222 | 5.23E-06    | 0.12972973  | 0          |
| biological_process | positive regulation of protein metabolic process                        | GO:0051247 | 15870 | 667  | 1.139464882 | 9.55E-11 | 0.005405405 | 0 | 1.114645308 | 8.25E-08    | 0.063063063 | 0          |
| molecular_function | transferase activity, transferring phosphorus-containing groups         | GO:0016772 | 15963 | 898  | 1.119310909 | 9.79E-11 | 0.005405405 | 0 | 1.108017866 | 4.15E-09    | 0.048648649 | 0          |
| biological_process | cytoskeleton organization                                               | GO:0007010 | 15811 | 726  | 1.132768531 | 1.17E-10 | 0.032432432 | 0 | 1.126695179 | 7.38E-10    | 0.048648649 | 0          |
| biological_process | chemical homeostasis                                                    | GO:0048878 | 15790 | 747  | 1.130747546 | 1.19E-10 | 0.034234234 | 0 | 1.069396606 | 0.000387073 | 0.16036036  | 0.0161346  |
| biological_process | regulation of intracellular protein kinase cascade                      | GO:0010627 | 15929 | 608  | 1.145477775 | 1.22E-10 | 0.005405405 | 0 | 1.084175371 | 0.000124679 | 0.136936937 | 0.0082729  |
| biological_process | positive regulation of RNA metabolic process                            | GO:0051254 | 15599 | 938  | 1.115580125 | 1.37E-10 | 0.012612613 | 0 | 1.13058213  | 4.94E-13    | 0.041441441 | 0          |
| biological_process | regulation of protein phosphorylation                                   | GO:0001932 | 15897 | 640  | 1.141210774 | 1.39E-10 | 0.018018018 | 0 | 1.085539559 | 6.60E-05    | 0.162162162 | 0.0030506  |
| biological_process | regulation of membrane potential                                        | GO:0042391 | 16278 | 259  | 1.223754107 | 1.62E-10 | 0.057657658 | 0 | 1.161769591 | 2.75E-06    | 0.082882883 | 0          |
| biological_process | protein autophosphorylation                                             | GO:0046777 | 16367 | 170  | 1.276728778 | 1.67E-10 | 0.028828829 | 0 | 1.218004647 | 3.73E-07    | 0.066666667 | 0          |
| biological_process | positive regulation of developmental process                            | GO:0051094 | 15902 | 635  | 1.140819062 | 1.83E-10 | 0.012612613 | 0 | 1.105845328 | 1.23E-06    | 0.131531532 | 0          |
| biological_process | regulation of cell adhesion                                             | GO:0030155 | 16294 | 243  | 1.230102907 | 1.94E-10 | 0.001801802 | 0 | 1.17044213  | 1.77E-06    | 0.077477477 | 0          |
| biological_process | transport                                                               | GO:0006810 | 13523 | 3014 | 1.059484628 | 1.99E-10 | 0.111711712 | 0 | 1.044610628 | 1.36E-06    | 0.163963964 | 0          |
| biological_process | cellular protein modification process                                   | GO:0006464 | 14250 | 2287 | 1.069919615 | 2.20E-10 | 0.117117117 | 0 | 1.083419594 | 4.91E-14    | 0.059459459 | 0          |
| biological_process | protein modification process                                            | GO:0036211 | 14250 | 2287 | 1.069919615 | 2.20E-10 | 0.117117117 | 0 | 1.083419594 | 4.91E-14    | 0.059459459 | 0          |
| biological_process | regulation of neuron projection development                             | GO:0010975 | 16317 | 220  | 1.241151222 | 2.23E-10 | 0.045045045 | 0 | 1.243146633 | 1.60E-10    | 0.07027027  | 0          |
| molecular_function | protein domain specific binding                                         | GO:0019904 | 16326 | 535  | 1.153115024 | 2.27E-10 | 0.054054054 | 0 | 1.141905828 | 3.79E-09    | 0.052252252 | 0          |
| cellular_component | postsynaptic density                                                    | GO:0014069 | 16705 | 118  | 1.328409685 | 2.81E-10 | 0.079279279 | 0 | 1.296161548 | 1.12E-08    | 0.063063063 | 0          |
| cellular_component | dendritic spine head                                                    | GO:0044327 | 16705 | 118  | 1.328409685 | 2.81E-10 | 0.079279279 | 0 | 1.296161548 | 1.12E-08    | 0.063063063 | 0          |
| biological_process | regulation of action potential                                          | GO:0001508 | 16391 | 146  | 1.294217531 | 3.11E-10 | 0.023423423 | 0 | 1.144872315 | 0.00116167  | 0.163963964 | 0.0416234  |
| biological_process | response to oxygen-containing compound                                  | GO:1901700 | 15613 | 924  | 1.113588878 | 3.76E-10 | 0.010810811 | 0 | 1.062458922 | 0.000356872 | 0.133333333 | 0.013988   |
| biological_process | regulation of cell morphogenesis involved in differentiation            | GO:0010769 | 16363 | 174  | 1.26755521  | 3.99E-10 | 0.034234234 | 0 | 1.22984326  | 6.49E-08    | 0.113513514 | 0          |
| biological_process | heart development                                                       | GO:0007507 | 16168 | 369  | 1.181220466 | 5.37E-10 | 0.014414414 | 0 | 1.140122567 | 1.21E-06    | 0.131531532 | 0          |
| biological_process | embryo development ending in birth or egg hatching                      | GO:0009792 | 16018 | 519  | 1.151634287 | 6.03E-10 | 0.014414414 | 0 | 1.115298161 | 1.89E-06    | 0.127927928 | 0          |
| biological_process | epithelium development                                                  | GO:0060429 | 15843 | 694  | 1.130353096 | 6.13E-10 | 0.014414414 | 0 | 1.125670824 | 2.34E-09    | 0.066666667 | 0          |
| biological_process | neurotransmitter transport                                              | GO:0006836 | 16421 | 116  | 1.324560999 | 6.16E-10 | 0.009090909 | 0 | 1.219181607 | 2.04E-05    | 0.136936937 | 0          |
| biological_process | positive regulation of nucleobase-containing compound metabolic process | GO:0045935 | 15495 | 1042 | 1.105194081 | 6.16E-10 | 0.010810811 | 0 | 1.12046403  | 1.73E-12    | 0.037837838 | 0          |
| biological_process | cell-substrate adhesion                                                 | GO:0031589 | 16354 | 183  | 1.257832635 | 6.20E-10 | 0.007207207 | 0 | 1.141260182 | 0.000436885 | 0.165765766 | 0.0202383  |
| biological_process | positive regulation of molecular function                               | GO:0044093 | 15714 | 823  | 1.119099506 | 6.36E-10 | 0.005405405 | 0 | 1.095166916 | 6.14E-07    | 0.100909091 | 0          |
| cellular_component | axon                                                                    | GO:0030424 | 16523 | 300  | 1.200499931 | 6.42E-10 | 0.131531532 | 0 | 1.222365532 | 8.40E-12    | 0.075675676 | 0          |
| biological_process | cellular ion homeostasis                                                | GO:0006873 | 16011 | 526  | 1.150031836 | 6.93E-10 | 0.045045045 | 0 | 1.079768258 | 0.00064023  | 0.162162162 | 0.031639   |
| biological_process | chordate embryonic development                                          | GO:0043009 | 16024 | 513  | 1.151492135 | 7.83E-10 | 0.014414414 | 0 | 1.11395073  | 2.80E-06    | 0.135135135 | 0          |
| biological_process | response to stress                                                      | GO:0006950 | 14416 | 2121 | 1.070525401 | 8.44E-10 | 0.001801802 | 0 | 1.028064507 | 0.0082506   | 0.153153153 | 0.0774282  |
| biological_process | regulation of MAP kinase activity                                       | GO:0043405 | 16339 | 198  | 1.245638606 | 8.56E-10 | 0.001801802 | 0 | 1.088039606 | 0.0154413   | 0.245045045 | 0.105987   |
| biological_process | actin cytoskeleton organization                                         | GO:0030036 | 16160 | 377  | 1.176813003 | 9.89E-10 | 0.028828829 | 0 | 1.149979767 | 1.68E-07    | 0.091891892 | 0          |
| biological_process | cellular chemical homeostasis                                           | GO:0050842 | 15959 | 578  | 1.141558452 | 9.84E-10 | 0.041441441 | 0 | 1.071868661 | 0.00115827  | 0.174774775 | 0.0417807  |
| biological_process | morphogenesis of a branching structure                                  | GO:0001763 | 16357 | 180  | 1.256558092 | 1.02E-09 | 0.001801802 | 0 | 1.193175235 | 3.18E-06    | 0.102702703 | 0          |
| biological_process | regulation of cell proliferation                                        | GO:0042127 | 15588 | 949  | 1.109017102 | 1.04E-09 | 0.009090909 | 0 | 1.075206553 | 1.79E-05    | 0.073873874 | 0          |
| biological_process | taxis                                                                   | GO:0042330 | 16223 | 314  | 1.193071761 | 1.10E-09 | 0.001801802 | 0 | 1.168322654 | 9.15E-08    | 0.027027027 | 0          |
| biological_process | positive regulation of MAPK cascade                                     | GO:0043410 | 16270 | 267  | 1.209321963 | 1.17E-09 | 0.03603604  | 0 | 1.116701007 |             |             |            |

|                    |                                                                      |            |       |      |             |          |             |   |             |             |             |           |
|--------------------|----------------------------------------------------------------------|------------|-------|------|-------------|----------|-------------|---|-------------|-------------|-------------|-----------|
| biological_process | regulation of protein modification process                           | GO:0031399 | 15745 | 792  | 1.118975502 | 1.40E-09 | 0.028828829 | 0 | 1.097042471 | 6.24E-07    | 0.088288288 | 0         |
| biological_process | ameboidal cell migration                                             | GO:0001667 | 16346 | 191  | 1.246405404 | 1.49E-09 | 0.012612613 | 0 | 1.216843055 | 8.90E-08    | 0.064864865 | 0         |
| biological_process | chemotaxis                                                           | GO:0006935 | 16224 | 313  | 1.1913043   | 1.62E-09 | 0.001801802 | 0 | 1.16669249  | 1.25E-07    | 0.027027027 | 0         |
| biological_process | positive regulation of nitrogen compound metabolic process           | GO:0051173 | 15470 | 1067 | 1.100960768 | 1.75E-09 | 0.012612613 | 0 | 1.114761073 | 9.53E-12    | 0.03963964  | 0         |
| biological_process | cellular response to chemical stimulus                               | GO:0070887 | 15309 | 1228 | 1.093605841 | 1.77E-09 | 0.012612613 | 0 | 1.0822215   | 1.07E-07    | 0.086486486 | 0         |
| biological_process | muscle structure development                                         | GO:0061061 | 16128 | 409  | 1.165990118 | 1.96E-09 | 0.001801802 | 0 | 1.158955839 | 8.59E-09    | 0.025252525 | 0         |
| biological_process | blood circulation                                                    | GO:0008015 | 16257 | 280  | 1.201077697 | 2.08E-09 | 0.007207207 | 0 | 1.148968096 | 6.67E-06    | 0.064864865 | 0         |
| molecular_function | ATP binding                                                          | GO:0005524 | 15426 | 1435 | 1.085632491 | 2.12E-09 | 0.093693694 | 0 | 1.087872442 | 8.30E-10    | 0.12972973  | 0         |
| biological_process | macromolecule modification                                           | GO:0043412 | 14166 | 2371 | 1.064418192 | 2.18E-09 | 0.122525253 | 0 | 1.082928083 | 2.07E-14    | 0.043243243 | 0         |
| cellular_component | membrane raft                                                        | GO:0045121 | 16624 | 199  | 1.238749091 | 2.20E-09 | 0.014414414 | 0 | 1.141090035 | 0.000262186 | 0.163963964 | 0         |
| biological_process | striated muscle tissue development                                   | GO:0014706 | 16241 | 296  | 1.194484809 | 2.48E-09 | 0.001801802 | 0 | 1.16048029  | 6.98E-07    | 0.03963964  | 0         |
| biological_process | muscle tissue development                                            | GO:0060537 | 16227 | 310  | 1.18974487  | 2.59E-09 | 0.001801802 | 0 | 1.160045819 | 4.17E-07    | 0.03963964  | 0         |
| molecular_function | adenyl ribonucleotide binding                                        | GO:0032559 | 15400 | 1461 | 1.084319176 | 2.59E-09 | 0.097297297 | 0 | 1.088321552 | 4.73E-10    | 0.131531532 | 0         |
| molecular_function | enzyme binding                                                       | GO:0019899 | 15834 | 1027 | 1.101823082 | 2.73E-09 | 0.082882883 | 0 | 1.117747077 | 7.67E-12    | 0.045045045 | 0         |
| molecular_function | adenyl nucleotide binding                                            | GO:0030554 | 15396 | 1465 | 1.08398176  | 2.83E-09 | 0.093693694 | 0 | 1.087600781 | 6.09E-10    | 0.131531532 | 0         |
| biological_process | regulation of cell projection organization                           | GO:0031344 | 16268 | 269  | 1.20335632  | 2.86E-09 | 0.05045045  | 0 | 1.217490763 | 2.34E-10    | 0.063063063 | 0         |
| biological_process | cell proliferation                                                   | GO:0008283 | 15351 | 1186 | 1.093881752 | 3.08E-09 | 0.010810811 | 0 | 1.079004626 | 5.01E-07    | 0.043243243 | 0         |
| biological_process | negative regulation of cell communication                            | GO:0010648 | 15942 | 595  | 1.135031722 | 3.12E-09 | 0.043243243 | 0 | 1.123674088 | 5.14E-08    | 0.084684685 | 0         |
| biological_process | morphogenesis of a branching epithelium                              | GO:0061138 | 13637 | 170  | 1.255906788 | 3.14E-09 | 0.001801802 | 0 | 1.196506848 | 4.08E-06    | 0.095495495 | 0         |
| cellular_component | synaptic membrane                                                    | GO:0097060 | 16619 | 204  | 1.232798346 | 3.43E-09 | 0.154954955 | 0 | 1.211120619 | 7.40E-08    | 0.142342342 | 0         |
| cellular_component | vesicle                                                              | GO:0031982 | 15983 | 840  | 1.110875367 | 5.64E-09 | 0.077477477 | 0 | 1.067700062 | 0.000244438 | 0.162162162 | 0         |
| molecular_function | receptor binding                                                     | GO:0005102 | 15884 | 977  | 1.102244739 | 5.88E-09 | 0.009090909 | 0 | 1.065904199 | 0.000118392 | 0.108108108 | 0         |
| biological_process | positive regulation of protein serine/threonine kinase activity      | GO:0071902 | 16354 | 183  | 1.241972438 | 5.95E-09 | 0.001801802 | 0 | 1.118262895 | 0.00266454  | 0.183783784 | 0.0525408 |
| biological_process | response to growth factor stimulus                                   | GO:0070848 | 16210 | 327  | 1.180082927 | 6.10E-09 | 0.012612613 | 0 | 1.177926825 | 9.07E-09    | 0.057657658 | 0         |
| cellular_component | membrane-bounded vesicle                                             | GO:0031988 | 16074 | 749  | 1.117104273 | 6.77E-09 | 0.057657658 | 0 | 1.070021341 | 0.000342283 | 0.144141414 | 0         |
| biological_process | branching morphogenesis of an epithelial tube                        | GO:0048754 | 16391 | 146  | 1.269442626 | 7.39E-09 | 0.001801802 | 0 | 1.232715134 | 4.99E-07    | 0.057657658 | 0         |
| biological_process | positive regulation of catalytic activity                            | GO:0043085 | 15889 | 648  | 1.125669797 | 7.89E-09 | 0.009090909 | 0 | 1.095962582 | 7.93E-06    | 0.120720721 | 0         |
| biological_process | negative regulation of signaling                                     | GO:0023057 | 15946 | 591  | 1.131422565 | 8.73E-09 | 0.014414411 | 0 | 1.122949    | 6.74E-08    | 0.082882883 | 0         |
| biological_process | negative regulation of response to stimulus                          | GO:0048585 | 15845 | 692  | 1.120986603 | 8.93E-09 | 0.016216216 | 0 | 1.122667796 | 5.65E-09    | 0.032432432 | 0         |
| biological_process | positive regulation of cellular protein metabolic process            | GO:0032270 | 15945 | 592  | 1.131025096 | 9.37E-09 | 0.009090909 | 0 | 1.10982896  | 1.22E-06    | 0.079279279 | 0         |
| biological_process | muscle organ development                                             | GO:0007517 | 16250 | 287  | 1.189893724 | 9.49E-09 | 0.001801802 | 0 | 1.162858442 | 7.15E-07    | 0.018018018 | 0         |
| biological_process | response to nitrogen compound                                        | GO:1901698 | 15954 | 583  | 1.131886308 | 9.80E-09 | 0.010810811 | 0 | 1.061792294 | 0.0042576   | 0.189189189 | 0.0577993 |
| biological_process | regulation of protein metabolic process                              | GO:0051246 | 15372 | 1165 | 1.091084268 | 1.17E-08 | 0.025225225 | 0 | 1.075046238 | 2.09E-06    | 0.064864865 | 0         |
| biological_process | response to endogenous stimulus                                      | GO:0009719 | 15548 | 989  | 1.099359832 | 1.19E-08 | 0.054054054 | 0 | 1.076568235 | 8.49E-06    | 0.124324324 | 0         |
| biological_process | regulation of immune system process                                  | GO:0002682 | 15933 | 604  | 1.128480479 | 1.26E-08 | 0.009090909 | 0 | 1.030297682 | 0.0944508   | 0.227027027 | 0.256104  |
| biological_process | cellular response to growth factor stimulus                          | GO:0071363 | 16229 | 308  | 1.180810649 | 1.44E-08 | 0.009090909 | 0 | 1.172423797 | 6.09E-08    | 0.063063063 | 0         |
| biological_process | regulation of action potential in neuron                             | GO:0019228 | 16434 | 103  | 1.313625116 | 1.60E-08 | 0.018018018 | 0 | 1.100920981 | 0.0375741   | 0.25045045  | 0.161696  |
| biological_process | regulation of cellular catabolic process                             | GO:0031329 | 16113 | 424  | 1.153048723 | 1.60E-08 | 0.030630631 | 0 | 1.148610673 | 3.95E-08    | 0.034234234 | 0         |
| molecular_function | enzyme regulator activity                                            | GO:0030234 | 16058 | 803  | 1.109901269 | 1.62E-08 | 0.014414414 | 0 | 1.119508233 | 9.24E-10    | 0.014414414 | 0         |
| biological_process | regulation of catabolic process                                      | GO:0009894 | 16046 | 491  | 1.141806688 | 1.65E-08 | 0.043243243 | 0 | 1.151240034 | 1.90E-09    | 0.034234234 | 0         |
| biological_process | wound healing                                                        | GO:0042060 | 16297 | 240  | 1.204265891 | 1.68E-08 | 0.001801802 | 0 | 1.114094472 | 0.00102127  | 0.090090909 | 0.038989  |
| molecular_function | ribonucleoside binding                                               | GO:0032549 | 15075 | 1786 | 1.071275136 | 1.72E-08 | 0.077477477 | 0 | 1.069734402 | 3.36E-08    | 0.118918919 | 0         |
| molecular_function | guanyl-nucleotide exchange factor activity                           | GO:0005085 | 16687 | 174  | 1.239385549 | 1.92E-08 | 0.014414414 | 0 | 1.240564832 | 1.65E-08    | 0.028828829 | 0         |
| molecular_function | purine ribonucleoside binding                                        | GO:0032550 | 15079 | 1782 | 1.070771121 | 2.23E-08 | 0.077477477 | 0 | 1.069419953 | 3.99E-08    | 0.118918919 | 0         |
| molecular_function | purine nucleoside binding                                            | GO:0001883 | 15076 | 1785 | 1.070652644 | 2.28E-08 | 0.075675676 | 0 | 1.069217364 | 4.23E-08    | 0.118918919 | 0         |
| biological_process | hindbrain development                                                | GO:0030902 | 16422 | 115  | 1.293173638 | 2.32E-08 | 0.010810811 | 0 | 1.22477757  | 1.40E-05    | 0.081081081 | 0         |
| biological_process | positive regulation of intracellular protein kinase cascade          | GO:0010740 | 16126 | 411  | 1.1535692   | 2.37E-08 | 0.001801802 | 0 | 1.098725186 | 0.000223579 | 0.145945946 | 0.0149874 |
| biological_process | regulation of purine nucleotide metabolic process                    | GO:1900542 | 16207 | 330  | 1.171678299 | 2.43E-08 | 0.01981982  | 0 | 1.15400361  | 4.92E-07    | 0.07027027  | 0         |
| cellular_component | extracellular region part                                            | GO:0044421 | 15976 | 847  | 1.105411091 | 2.48E-08 | 0.073873874 | 0 | 1.024122216 | 0.106057    | 0.252252252 | 0.173348  |
| biological_process | embryonic morphogenesis                                              | GO:0048598 | 16086 | 451  | 1.146183569 | 2.49E-08 | 0.009090909 | 0 | 1.164203004 | 4.56E-10    | 0.048648649 | 0         |
| biological_process | positive regulation of cell proliferation                            | GO:0008284 | 15997 | 540  | 1.133030722 | 2.61E-08 | 0.010810811 | 0 | 1.0724607   | 0.00151245  | 0.081081081 | 0.0428184 |
| molecular_function | nucleoside binding                                                   | GO:0001882 | 15065 | 1796 | 1.070098339 | 2.61E-08 | 0.079279279 | 0 | 1.069801153 | 2.97E-08    | 0.117117117 | 0         |
| molecular_function | purine ribonucleoside triphosphate binding                           | GO:0035639 | 15087 | 1774 | 1.07049842  | 2.71E-08 | 0.075675676 | 0 | 1.069268193 | 4.59E-08    | 0.122525253 | 0         |
| biological_process | regulation of nucleotide metabolic process                           | GO:0006140 | 16205 | 332  | 1.170327935 | 2.81E-08 | 0.021621622 | 0 | 1.153899852 | 4.63E-07    | 0.068468468 | 0         |
| cellular_component | cell surface                                                         | GO:0009986 | 16354 | 469  | 1.14242128  | 3.01E-08 | 0.023423423 | 0 | 1.083152176 | 0.000779362 | 0.165765766 | 0         |
| molecular_function | purine ribonucleotide binding                                        | GO:0032555 | 15054 | 1807 | 1.069353864 | 3.25E-08 | 0.086486486 | 0 | 1.067909803 | 6.06E-08    | 0.120720721 | 0         |
| biological_process | negative regulation of cellular metabolic process                    | GO:0031324 | 15385 | 1152 | 1.088532046 | 3.41E-08 | 0.007207207 | 0 | 1.092059287 | 1.01E-08    | 0.034234234 | 0         |
| molecular_function | purine nucleotide binding                                            | GO:0017076 | 15049 | 1812 | 1.069027976 | 3.58E-08 | 0.082882883 | 0 | 1.067011868 | 8.48E-08    | 0.122525253 | 0         |
| biological_process | positive regulation of kinase activity                               | GO:0033674 | 16236 | 301  | 1.177523589 | 3.64E-08 | 0.005405405 | 0 | 1.114995483 | 0.000243796 | 0.145945946 | 0.01466   |
| biological_process | positive regulation of transferase activity                          | GO:0051347 | 16226 | 311  | 1.174432538 | 3.75E-08 | 0.003603604 | 0 | 1.112176799 | 0.000270932 | 0.144141414 | 0.0144163 |
| biological_process | response to organic nitrogen                                         | GO:0010243 | 15994 | 543  | 1.130879967 | 3.91E-08 | 0.01981982  | 0 | 1.068335036 | 0.00252011  | 0.174774775 | 0.0530963 |
| biological_process | ensheathment of neurons                                              | GO:0007272 | 16450 | 87   | 1.331313843 | 4.01E-08 | 0.014414414 | 0 | 1.062854246 | 0.154319    | 0.317117117 | 0.345003  |
| biological_process | axon ensheathment                                                    | GO:0008366 | 16450 | 87   | 1.331313843 | 4.01E-08 | 0.014414414 | 0 | 1.062854246 | 0.154319    | 0.317117117 | 0.345003  |
| biological_process | response to wounding                                                 | GO:0009611 | 15908 | 629  | 1.121156309 | 4.03E-08 | 0.001801802 | 0 | 1.041422538 | 0.0332866   | 0.221621622 | 0.151773  |
| biological_process | regulation of transport                                              | GO:0051049 | 15683 | 854  | 1.102949308 | 4.38E-08 | 0.011711711 | 0 | 1.094575973 | 4.42E-07    | 0.082882883 | 0         |
| biological_process | negative regulation of transcription from RNA polymerase II promoter | GO:0000122 | 16044 | 493  | 1.13698573  | 4.43E-08 | 0.001801802 | 0 | 1.129970085 | 1.94E-07    | 0.045045045 | 0         |
| biological_process | Rho protein signal transduction                                      | GO:0007266 | 16351 | 186  | 1.22452185  | 4.81E-08 | 0.018018018 | 0 | 1.253311946 | 8.84E-10    | 0.01981982  | 0         |
| biological_process | muscle cell differentiation                                          | GO:0042692 | 16257 | 280  | 1.182397711 | 4.86E-08 | 0.005405405 | 0 | 1.200904934 | 2.14E-09    | 0.009090909 | 0         |
| biological_process | negative regulation of signal transduction                           | GO:0009968 | 15982 | 555  | 1.128425424 | 4.90E-08 | 0.03963964  | 0 | 1.13558341  | 9.13E-09    | 0.045045045 | 0         |
| biological_process | growth                                                               | GO:0040007 | 15837 | 700  | 1.113795304 | 4.95E-08 | 0.012612613 | 0 | 1.099471534 | 1.60E-06    | 0.106306306 | 0         |
| biological_process | regulation of protein serine/threonine kinase activity               | GO:0071900 | 16253 | 284  | 1.180605479 | 5.26E-08 | 0.003603604 | 0 | 1.068830945 | 0.0213562   | 0.25045045  | 0.127342  |
| biological_process | positive regulation of protein kinase activity                       | GO:0045860 | 16259 | 278  | 1.182434439 | 5.38E-08 | 0.005405405 | 0 | 1.123202876 | 0.000166475 | 0.127927928 | 0.0105599 |
| molecular_function | ribonucleotide binding                                               | GO:0032553 | 15040 | 1821 | 1.067431091 | 5.66E-08 | 0.097297297 | 0 | 1.067847952 | 5.48E-08    | 0.118918919 | 0         |
| biological_process | regulation of kinase activity                                        | GO:0043549 | 16068 | 469  | 1.138636232 | 6.62E-08 | 0.010810811 | 0 | 1.071145257 | 0.00339188  | 0.207207207 | 0.0574954 |
| biological_process | regulation of synapse structure and activity                         | GO:0050803 | 16483 | 54   | 1.412786915 | 7.10E-08 | 0.007207207 | 0 | 1.23851429  | 0.00117981  | 0.178378378 | 0.0413927 |
| biological_process | small GTPase mediated signal transduction                            | GO:0007264 | 15984 | 553  | 1.12675943  | 7.54E-08 | 0.052252252 | 0 | 1.145929547 | 7.43E-10    | 0.030630631 | 0         |
| cellular_component | focal adhesion                                                       | GO:0005925 | 16703 | 120  | 1.275767447 | 7.55E-08 | 0.005405405 | 0 | 1.176771911 | 0.000381225 | 0.099090909 | 0         |
| biological_process | regulation of cellular component biogenesis                          | GO:0044087 | 16208 | 329  | 1.165399499 | 7.65E-08 | 0.0072      |   |             |             |             |           |

|                    |                                                                    |            |       |      |             |          |             |   |             |             |             |            |
|--------------------|--------------------------------------------------------------------|------------|-------|------|-------------|----------|-------------|---|-------------|-------------|-------------|------------|
| biological_process | regulation of hydrolase activity                                   | GO:0051336 | 15945 | 592  | 1.121532185 | 9.14E-08 | 0.028828829 | 0 | 1.095100342 | 2.24E-05    | 0.073873874 | 0          |
| cellular_component | cell projection membrane                                           | GO:0031253 | 16655 | 168  | 1.231001442 | 9.93E-08 | 0.001801802 | 0 | 1.123763708 | 0.00261528  | 0.144414414 | 0          |
| biological_process | regulation of stress-activated protein kinase signaling cascade    | GO:0070302 | 16398 | 139  | 1.253842056 | 9.67E-08 | 0.007207207 | 0 | 1.129514935 | 0.00395406  | 0.171171171 | 0.0589714  |
| biological_process | positive regulation of cellular component organization             | GO:0051130 | 16063 | 474  | 1.135835676 | 1.01E-07 | 0.041441441 | 0 | 1.132603115 | 1.95E-07    | 0.079279279 | 0          |
| biological_process | positive regulation of cell adhesion                               | GO:0045785 | 16420 | 117  | 1.276091519 | 1.05E-07 | 0.001801802 | 0 | 1.169665992 | 0.000711388 | 0.145945946 | 0.0311924  |
| biological_process | stem cell differentiation                                          | GO:0048863 | 16297 | 240  | 1.191764338 | 1.09E-07 | 0.003603604 | 0 | 1.145033422 | 4.42E-05    | 0.104504505 | 0.00320648 |
| biological_process | regulation of protein kinase activity                              | GO:0045859 | 16100 | 437  | 1.141149351 | 1.11E-07 | 0.012612613 | 0 | 1.076370787 | 0.00253565  | 0.187387387 | 0.0530149  |
| biological_process | regulation of transferase activity                                 | GO:0051338 | 16049 | 488  | 1.133337517 | 1.12E-07 | 0.012612613 | 0 | 1.066955155 | 0.00465562  | 0.205405405 | 0.0590523  |
| biological_process | cellular localization                                              | GO:0051641 | 14873 | 1664 | 1.069372048 | 1.18E-07 | 0.10990991  | 0 | 1.057794652 | 8.33E-06    | 0.135131535 | 0          |
| biological_process | regulation of stress-activated MAPK cascade                        | GO:0032872 | 16399 | 138  | 1.25226289  | 1.27E-07 | 0.007207207 | 0 | 1.129190629 | 0.00414888  | 0.172972973 | 0.0584317  |
| biological_process | response to peptide                                                | GO:1901652 | 16265 | 272  | 1.178617507 | 1.34E-07 | 0.027027027 | 0 | 1.093439062 | 0.00355831  | 0.167567568 | 0.0593976  |
| biological_process | negative regulation of macromolecule metabolic process             | GO:0010605 | 15347 | 1190 | 1.082938636 | 1.34E-07 | 0.001801802 | 0 | 1.087084945 | 3.31E-08    | 0.027027027 | 0          |
| biological_process | positive regulation of JUN kinase activity                         | GO:0043507 | 16486 | 51   | 1.414721595 | 1.39E-07 | 0.001801802 | 0 | 1.285338805 | 0.000203933 | 0.075675676 | 0.0127748  |
| biological_process | cell-matrix adhesion                                               | GO:0007160 | 16426 | 111  | 1.280407877 | 1.42E-07 | 0.012612613 | 0 | 1.189990639 | 0.000251962 | 0.09009009  | 0.0146252  |
| biological_process | negative regulation of cellular macromolecule biosynthetic process | GO:2000113 | 15707 | 830  | 1.100267805 | 1.42E-07 | 0.001801802 | 0 | 1.110252874 | 8.26E-09    | 0.045045045 | 0          |
| cellular_component | cytoplasmic vesicle                                                | GO:0031410 | 16069 | 754  | 1.105407988 | 1.45E-07 | 0.082882883 | 0 | 1.072836401 | 0.000196625 | 0.127927928 | 0          |
| biological_process | response to abiotic stimulus                                       | GO:0009628 | 15771 | 766  | 1.104476403 | 1.46E-07 | 0.03963964  | 0 | 1.068238827 | 0.000404614 | 0.142342342 | 0.0182733  |
| biological_process | striated muscle cell development                                   | GO:0055002 | 16394 | 143  | 1.246313751 | 1.50E-07 | 0.007207207 | 0 | 1.242271341 | 2.33E-07    | 0.016216216 | 0          |
| biological_process | negative regulation of metabolic process                           | GO:0009892 | 15270 | 1267 | 1.079863378 | 1.50E-07 | 0.009090909 | 0 | 1.081858264 | 7.52E-08    | 0.037837838 | 0          |
| biological_process | stress-activated protein kinase signaling cascade                  | GO:0031098 | 16375 | 162  | 1.231175388 | 1.51E-07 | 0.005405405 | 0 | 1.115019019 | 0.00541469  | 0.151351351 | 0.0626739  |
| biological_process | regulation of blood pressure                                       | GO:0008217 | 16420 | 117  | 1.272112066 | 1.56E-07 | 0.007207207 | 0 | 1.145141694 | 0.00317673  | 0.118918919 | 0.0567866  |
| cellular_component | main axon                                                          | GO:0044304 | 16779 | 44   | 1.444471337 | 1.58E-07 | 0.07027027  | 0 | 1.331099686 | 6.97E-05    | 0.108108108 | 0          |
| biological_process | synapse assembly                                                   | GO:0007416 | 16480 | 57   | 1.389364142 | 1.69E-07 | 0.052252252 | 0 | 1.299138886 | 4.45E-05    | 0.147747748 | 0.00319624 |
| biological_process | cell junction organization                                         | GO:0034330 | 16421 | 116  | 1.272204914 | 1.73E-07 | 0.037837838 | 0 | 1.258495585 | 6.52E-07    | 0.063063063 | 0          |
| cellular_component | cell-cell junction                                                 | GO:0005911 | 16560 | 263  | 1.179638992 | 1.83E-07 | 0.086486486 | 0 | 1.152500488 | 7.89E-06    | 0.065855856 | 0          |
| cellular_component | clathrin-coated vesicle                                            | GO:0030136 | 16651 | 172  | 1.222527446 | 1.88E-07 | 0.055855856 | 0 | 1.130058442 | 0.00149033  | 0.138738739 | 0          |
| biological_process | renal system development                                           | GO:0072001 | 16307 | 230  | 1.192062292 | 1.88E-07 | 0.014414414 | 0 | 1.159241853 | 1.26E-05    | 0.068464648 | 0          |
| biological_process | response to organic cyclic compound                                | GO:0014070 | 15887 | 650  | 1.112700785 | 1.91E-07 | 0.016216216 | 0 | 1.043457693 | 0.025128    | 0.268464648 | 0.136043   |
| cellular_component | postsynaptic membrane                                              | GO:0045211 | 16651 | 172  | 1.221863941 | 2.03E-07 | 0.14954955  | 0 | 1.199823157 | 2.53E-06    | 0.144141414 | 0          |
| biological_process | regulation of neurotransmitter levels                              | GO:0001505 | 16429 | 108  | 1.280265637 | 2.08E-07 | 0.016216216 | 0 | 1.205969605 | 9.97E-05    | 0.099099099 | 0.00862804 |
| biological_process | negative regulation of gene expression                             | GO:0010629 | 15701 | 836  | 1.098432312 | 2.11E-07 | 0.001801802 | 0 | 1.108552579 | 1.21E-08    | 0.025225225 | 0          |
| cellular_component | coated vesicle                                                     | GO:0030135 | 16617 | 206  | 1.202166761 | 2.13E-07 | 0.068486486 | 0 | 1.130055221 | 0.000570646 | 0.136936937 | 0          |
| biological_process | hematopoietic or lymphoid organ development                        | GO:0048534 | 16026 | 511  | 1.127088389 | 2.16E-07 | 0.005405405 | 0 | 1.124463813 | 3.70E-07    | 0.007207207 | 0          |
| biological_process | tissue migration                                                   | GO:0090130 | 16409 | 128  | 1.256561032 | 2.24E-07 | 0.009090909 | 0 | 1.242294598 | 9.37E-07    | 0.048648649 | 0          |
| biological_process | endothelial cell migration                                         | GO:0043542 | 16444 | 93   | 1.300937839 | 2.32E-07 | 0.001801802 | 0 | 1.220351577 | 0.000111672 | 0.066666667 | 0.00843483 |
| biological_process | cognition                                                          | GO:0050890 | 16370 | 167  | 1.22398251  | 2.34E-07 | 0.142342342 | 0 | 1.146722334 | 0.000481955 | 0.228828829 | 0.0220474  |
| biological_process | stress-activated MAPK cascade                                      | GO:0051403 | 16379 | 158  | 1.230227986 | 2.37E-07 | 0.005405405 | 0 | 1.115179944 | 0.0058739   | 0.16036036  | 0.064597   |
| biological_process | myelination                                                        | GO:0042552 | 16453 | 84   | 1.316083059 | 2.45E-07 | 0.018018018 | 0 | 1.063934212 | 0.154464    | 0.317117117 | 0.344722   |
| cellular_component | extracellular matrix                                               | GO:0031012 | 16450 | 373  | 1.148669249 | 2.46E-07 | 0.084686486 | 0 | 1.111288059 | 8.33E-05    | 0.106306306 | 0          |
| biological_process | regulation of JNK cascade                                          | GO:0046328 | 16413 | 124  | 1.25976176  | 2.46E-07 | 0.005405405 | 0 | 1.121975013 | 0.00910233  | 0.207207207 | 0.0779109  |
| biological_process | epithelial cell migration                                          | GO:0010631 | 16412 | 125  | 1.258342541 | 2.56E-07 | 0.009090909 | 0 | 1.243598267 | 1.09E-06    | 0.05045045  | 0          |
| biological_process | epithelium migration                                               | GO:0090132 | 16412 | 125  | 1.258342541 | 2.56E-07 | 0.009090909 | 0 | 1.243598267 | 1.09E-06    | 0.05045045  | 0          |
| biological_process | striated muscle cell differentiation                               | GO:0051146 | 16324 | 213  | 1.197212614 | 2.61E-07 | 0.010810811 | 0 | 1.2150518   | 2.23E-08    | 0.010810811 | 0          |
| cellular_component | axon part                                                          | GO:0033267 | 16676 | 147  | 1.237817713 | 2.64E-07 | 0.126126126 | 0 | 1.260493462 | 1.96E-08    | 0.061261261 | 0          |
| molecular_function | neurotransmitter transporter activity                              | GO:0005326 | 16841 | 20   | 1.647029877 | 2.65E-07 | 0.001801802 | 0 | 1.135334614 | 0.147107    | 0.297297297 | 0.287678   |
| biological_process | response to peptide hormone stimulus                               | GO:0043434 | 16274 | 263  | 1.176922409 | 2.73E-07 | 0.027027027 | 0 | 1.096728907 | 0.00308191  | 0.158558559 | 0.0570245  |
| biological_process | learning or memory                                                 | GO:0007611 | 16380 | 157  | 1.22964467  | 2.75E-07 | 0.136936937 | 0 | 1.135015734 | 0.00161909  | 0.237837838 | 0.0439994  |
| biological_process | vasoconstriction                                                   | GO:0042310 | 16484 | 53   | 1.39525216  | 2.99E-07 | 0.012612613 | 0 | 1.10093301  | 0.101201    | 0.228828829 | 0.262205   |
| biological_process | dendrite development                                               | GO:0016358 | 16412 | 125  | 1.25680426  | 2.99E-07 | 0.138738739 | 0 | 1.292465281 | 6.53E-09    | 0.088288288 | 0          |
| biological_process | negative regulation of transcription, DNA-dependent                | GO:0045892 | 15795 | 742  | 1.103245751 | 3.11E-07 | 0.001801802 | 0 | 1.111945828 | 3.25E-08    | 0.034234234 | 0          |
| cellular_component | neuronal cell body                                                 | GO:0043025 | 16489 | 334  | 1.155720565 | 3.19E-07 | 0.133333333 | 0 | 1.179699011 | 4.58E-09    | 0.025225225 | 0          |
| biological_process | cellular carbohydrate biosynthetic process                         | GO:0034637 | 16434 | 103  | 1.28194745  | 3.32E-07 | 0.001801802 | 0 | 1.140181092 | 0.00672049  | 0.07027027  | 0.0697055  |
| biological_process | muscle cell development                                            | GO:0055001 | 16383 | 154  | 1.229710394 | 3.51E-07 | 0.012612613 | 0 | 1.241945146 | 8.71E-08    | 0.012612613 | 0          |
| molecular_function | calcium ion binding                                                | GO:0005509 | 16291 | 570  | 1.117907272 | 3.52E-07 | 0.061261261 | 0 | 1.076514474 | 0.000643245 | 0.145945946 | 0          |
| biological_process | developmental growth involved in morphogenesis                     | GO:0060560 | 16421 | 116  | 1.264761218 | 3.59E-07 | 0.018018018 | 0 | 1.196516906 | 0.000117063 | 0.082882883 | 0.00838804 |
| biological_process | positive regulation of MAP kinase activity                         | GO:0043406 | 16396 | 141  | 1.239710813 | 3.69E-07 | 0.001801802 | 0 | 1.114205328 | 0.00916408  | 0.205405405 | 0.0775655  |
| biological_process | regulation of JUN kinase activity                                  | GO:0043506 | 16474 | 63   | 1.359248341 | 3.74E-07 | 0.003603604 | 0 | 1.220807696 | 0.0011773   | 0.075675676 | 0.0414701  |
| cellular_component | cell-substrate adherens junction                                   | GO:0005924 | 16698 | 125  | 1.253723926 | 4.07E-07 | 0.010810811 | 0 | 1.17568299  | 0.000319033 | 0.093693694 | 0          |
| cellular_component | actomyosin                                                         | GO:0042641 | 16764 | 59   | 1.37001895  | 4.08E-07 | 0.001801802 | 0 | 1.274549956 | 0.000126523 | 0.054054054 | 0          |
| biological_process | endocytosis                                                        | GO:0006897 | 16224 | 313  | 1.159382358 | 4.09E-07 | 0.057657658 | 0 | 1.148223974 | 2.26E-06    | 0.043243243 | 0          |
| biological_process | regulation of cell shape                                           | GO:0008360 | 16443 | 94   | 1.292694489 | 4.13E-07 | 0.009090909 | 0 | 1.242650967 | 2.19E-05    | 0.027027027 | 0          |
| cellular_component | cytoskeletal part                                                  | GO:0044430 | 15696 | 1127 | 1.081714666 | 4.35E-07 | 0.055855856 | 0 | 1.085364332 | 1.38E-07    | 0.063063063 | 0          |
| biological_process | negative regulation of macromolecule biosynthetic process          | GO:0010558 | 15679 | 858  | 1.094194837 | 4.60E-07 | 0.003603604 | 0 | 1.107934519 | 9.34E-09    | 0.041441441 | 0          |
| biological_process | regulation of GTP catabolic process                                | GO:0033124 | 16306 | 231  | 1.184095761 | 5.29E-07 | 0.068486486 | 0 | 1.191215685 | 2.00E-07    | 0.064864865 | 0          |
| biological_process | positive regulation of cell differentiation                        | GO:0045597 | 16079 | 458  | 1.129629255 | 5.50E-07 | 0.023423423 | 0 | 1.102849501 | 5.53E-05    | 0.126126126 | 0.00314628 |
| cellular_component | cytoplasmic membrane-bounded vesicle                               | GO:0016023 | 16138 | 685  | 1.105241282 | 5.55E-07 | 0.086486486 | 0 | 1.074582943 | 0.000278096 | 0.100909091 | 0          |
| biological_process | developmental growth                                               | GO:0048589 | 16278 | 259  | 1.172840423 | 5.99E-07 | 0.010810811 | 0 | 1.163665314 | 2.13E-06    | 0.081081081 | 0          |
| biological_process | negative regulation of cellular biosynthetic process               | GO:0031327 | 15654 | 883  | 1.091523239 | 6.44E-07 | 0.003603604 | 0 | 1.105213571 | 1.30E-08    | 0.043243243 | 0          |
| biological_process | establishment of localization in cell                              | GO:0051649 | 15091 | 1446 | 1.070081978 | 6.76E-07 | 0.106306306 | 0 | 1.051916787 | 0.000172231 | 0.151351351 | 0.0105405  |
| biological_process | cellular response to endogenous stimulus                           | GO:0071495 | 15969 | 568  | 1.114928519 | 6.90E-07 | 0.061261261 | 0 | 1.121963131 | 1.50E-07    | 0.082882883 | 0          |
| biological_process | neuromuscular process controlling balance                          | GO:0050885 | 16492 | 45   | 1.414790836 | 6.96E-07 | 0.010810811 | 0 | 1.248560323 | 0.000191417 | 0.185585586 | 0.0475937  |
| biological_process | regulation of nucleoside metabolic process                         | GO:0009118 | 16283 | 254  | 1.173231281 | 7.21E-07 | 0.048648649 | 0 | 1.165199168 | 2.16E-06    | 0.073873874 | 0          |
| biological_process | immune system development                                          | GO:0002520 | 15998 | 539  | 1.117838583 | 7.26E-07 | 0.005405405 | 0 | 1.115545549 | 1.16E-06    | 0.010810811 | 0          |
| biological_process | regulation of synapse organization                                 | GO:0050807 | 16488 | 49   | 1.396165847 | 7.53E-07 | 0.005405405 | 0 | 1.236873546 | 0.00201231  | 0.156756757 | 0.0506738  |
| biological_process | cellular homeostasis                                               | GO:0019725 | 15879 | 658  | 1.106075671 | 7.56E-07 | 0.064864865 | 0 | 1.063998723 | 0.00185561  | 0.136936937 | 0.0479053  |
| biological_process | locomotory behavior                                                | GO:0007626 | 16390 | 147  | 1.227480182 | 7.99E-07 | 0.106306306 | 0 | 1.230450058 | 5.83E-07    | 0.075675676 | 0          |
| biological_process | negative regulation of biosynthetic process                        | GO:0009890 | 15640 | 897  | 1.089952464 | 8.01E-07 | 0           |   |             |             |             |            |

|                    |                                                            |            |       |      |             |          |             |   |             |             |             |            |
|--------------------|------------------------------------------------------------|------------|-------|------|-------------|----------|-------------|---|-------------|-------------|-------------|------------|
| biological_process | hemopoiesis                                                | GO:0030097 | 16053 | 484  | 1.123831741 | 8.37E-07 | 0.005405405 | 0 | 1.121765369 | 1.24E-06    | 0.009090909 | 0          |
| biological_process | regulation of GTPase activity                              | GO:0043087 | 16309 | 228  | 1.181594212 | 8.66E-07 | 0.079279279 | 0 | 1.191152242 | 2.40E-07    | 0.068468468 | 0          |
| biological_process | JNK cascade                                                | GO:0007254 | 16396 | 141  | 1.231348355 | 8.83E-07 | 0.007207207 | 0 | 1.115045862 | 0.0087457   | 0.178378378 | 0.077737   |
| biological_process | regulation of nucleotide catabolic process                 | GO:0030811 | 16284 | 253  | 1.172084758 | 8.87E-07 | 0.046846847 | 0 | 1.165177658 | 2.26E-06    | 0.075675676 | 0          |
| biological_process | regulation of purine nucleotide catabolic process          | GO:0033121 | 16284 | 253  | 1.172084758 | 8.87E-07 | 0.046846847 | 0 | 1.165177658 | 2.26E-06    | 0.075675676 | 0          |
| biological_process | polysaccharide metabolic process                           | GO:0005976 | 16406 | 131  | 1.239702825 | 9.17E-07 | 0.001801802 | 0 | 1.143260262 | 0.00217713  | 0.03963964  | 0.050391   |
| molecular_function | amino acid transmembrane transporter activity              | GO:0015171 | 16798 | 63   | 1.343707852 | 1.10E-06 | 0.001801802 | 0 | 1.026702945 | 0.356518    | 0           | -1         |
| cellular_component | cell-cell adherens junction                                | GO:0005913 | 16774 | 49   | 1.389109599 | 1.15E-06 | 0.032432432 | 0 | 1.299230661 | 0.000139878 | 0.12972973  | 0          |
| cellular_component | caveola                                                    | GO:0005901 | 16760 | 63   | 1.342536705 | 1.19E-06 | 0.018018018 | 0 | 1.155781478 | 0.0159483   | 0.203603604 | 0.00814041 |
| biological_process | regulation of dendrite development                         | GO:0050773 | 16471 | 66   | 1.334567246 | 1.20E-06 | 0.046846847 | 0 | 1.296108399 | 1.49E-05    | 0.059459459 | 0          |
| biological_process | establishment of cell polarity                             | GO:0030010 | 16464 | 73   | 1.317304331 | 1.26E-06 | 0.003603604 | 0 | 1.259067151 | 6.09E-05    | 0.025225225 | 0.00306919 |
| biological_process | response to decreased oxygen levels                        | GO:0036293 | 16294 | 243  | 1.17289067  | 1.28E-06 | 0.003603604 | 0 | 1.089028161 | 0.00772704  | 0.113513514 | 0.0772018  |
| biological_process | regulation of Ras GTPase activity                          | GO:0032318 | 16365 | 172  | 1.205606595 | 1.33E-06 | 0.055855856 | 0 | 1.201387967 | 2.13E-06    | 0.064864865 | 0          |
| biological_process | gliogenesis                                                | GO:0042063 | 16370 | 167  | 1.208644891 | 1.34E-06 | 0.012612613 | 0 | 1.113215648 | 0.00543412  | 0.05045045  | 0.0638421  |
| molecular_function | insulin receptor binding                                   | GO:0005158 | 16833 | 28   | 1.511065576 | 1.38E-06 | 0.007207207 | 0 | 1.2731128   | 0.00611827  | 0.108108108 | 0          |
| biological_process | regulation of cellular protein metabolic process           | GO:0032268 | 15535 | 1002 | 1.082855419 | 1.39E-06 | 0.068468468 | 0 | 1.084064759 | 9.91E-07    | 0.046846847 | 0          |
| biological_process | positive regulation of multicellular organismal process    | GO:0051240 | 16073 | 464  | 1.123456084 | 1.49E-06 | 0.01981982  | 0 | 1.066116684 | 0.00617414  | 0.23963964  | 0.0647118  |
| biological_process | regulation of gene silencing                               | GO:0060968 | 16508 | 29   | 1.500048756 | 1.52E-06 | 0.007207207 | 0 | 1.057918192 | 0.29437     | 0.378378378 | -1         |
| biological_process | negative regulation of nitrogen compound metabolic process | GO:0051172 | 15692 | 845  | 1.090313825 | 1.52E-06 | 0.001801802 | 0 | 1.103192939 | 4.81E-08    | 0.036036036 | 0          |
| molecular_function | metal ion transmembrane transporter activity               | GO:0046873 | 16506 | 355  | 1.141315229 | 1.57E-06 | 0.111711712 | 0 | 1.117893937 | 5.04E-05    | 0.181981982 | 0          |
| cellular_component | extracellular matrix part                                  | GO:0044420 | 16654 | 169  | 1.205878697 | 1.59E-06 | 0.081081081 | 0 | 1.117107185 | 0.00402067  | 0.104504505 | 0          |
| biological_process | regulation of Rho protein signal transduction              | GO:0035023 | 16376 | 161  | 1.210692138 | 1.63E-06 | 0.025225225 | 0 | 1.249976912 | 1.69E-08    | 0.014414414 | 0          |
| biological_process | heart morphogenesis                                        | GO:0003007 | 16369 | 168  | 1.206143968 | 1.65E-06 | 0.005405405 | 0 | 1.164385743 | 0.000103866 | 0.082882883 | 0.00850602 |
| molecular_function | enzyme activator activity                                  | GO:0008047 | 16543 | 318  | 1.148644293 | 1.78E-06 | 0.037837838 | 0 | 1.160945415 | 2.60E-07    | 0.045045045 | 0          |
| biological_process | regulation of systemic arterial blood pressure             | GO:0003073 | 16475 | 62   | 1.338952079 | 1.82E-06 | 0.016216216 | 0 | 1.138172368 | 0.029516    | 0.176576577 | 0.14282    |
| biological_process | establishment or maintenance of cell polarity              | GO:0007163 | 16434 | 103  | 1.262644974 | 1.82E-06 | 0.010810811 | 0 | 1.224533149 | 3.76E-05    | 0.079279279 | 0.00325851 |
| biological_process | ion transport                                              | GO:0006811 | 15537 | 1000 | 1.081823635 | 1.89E-06 | 0.138738739 | 0 | 1.036030763 | 0.0208805   | 0.30990991  | 0.127076   |
| biological_process | regulation of axonogenesis                                 | GO:0050770 | 16441 | 96   | 1.271192787 | 1.96E-06 | 0.07027027  | 0 | 1.241420346 | 1.99E-05    | 0.117117117 | 0          |
| biological_process | blood vessel endothelial cell migration                    | GO:0043534 | 16482 | 55   | 1.358686984 | 1.96E-06 | 0.003603604 | 0 | 1.167120919 | 0.0157663   | 0.088288288 | 0.190902   |
| biological_process | cell junction assembly                                     | GO:0034329 | 16451 | 86   | 1.286542383 | 1.97E-06 | 0.059459459 | 0 | 1.217538282 | 0.000229737 | 0.140540541 | 0.0149136  |
| biological_process | extracellular structure organization                       | GO:0043062 | 16393 | 144  | 1.220854006 | 2.01E-06 | 0.025225225 | 0 | 1.119235847 | 0.00640234  | 0.163963964 | 0.0667541  |
| biological_process | urogenital system development                              | GO:0001655 | 16272 | 265  | 1.162184945 | 2.01E-06 | 0.023423423 | 0 | 1.155841614 | 4.72E-06    | 0.07027027  | 0          |
| cellular_component | cell body                                                  | GO:0044297 | 16456 | 367  | 1.137372809 | 2.02E-06 | 0.12972973  | 0 | 1.158842085 | 4.93E-08    | 0.030630631 | 0          |
| biological_process | regulation of neuronal synaptic plasticity                 | GO:0048168 | 16487 | 50   | 1.375626761 | 2.04E-06 | 0.063063063 | 0 | 1.188989306 | 0.0102206   | 0.223423423 | 0.0801685  |
| molecular_function | organic acid transmembrane transporter activity            | GO:0005342 | 16767 | 94   | 1.273542986 | 2.05E-06 | 0.001801802 | 0 | 1.011918418 | 0.420471    | 0.463063063 | -1         |
| biological_process | Wnt receptor signaling pathway                             | GO:0016055 | 16258 | 279  | 1.157867273 | 2.05E-06 | 0.016216216 | 0 | 1.149397558 | 6.53E-06    | 0.115315315 | 0          |
| biological_process | cerebellum development                                     | GO:0021549 | 16464 | 73   | 1.310541966 | 2.05E-06 | 0.010810811 | 0 | 1.261784024 | 5.17E-05    | 0.05045045  | 0.00316609 |
| molecular_function | protein complex binding                                    | GO:0032403 | 16525 | 336  | 1.143611895 | 2.06E-06 | 0.027027027 | 0 | 1.096393832 | 0.000996166 | 0.131531532 | 0          |
| biological_process | regulation of cellular response to growth factor stimulus  | GO:0090287 | 16413 | 124  | 1.237720562 | 2.09E-06 | 0.010810811 | 0 | 1.231625098 | 3.66E-06    | 0.034234234 | 0          |
| biological_process | activation of protein kinase activity                      | GO:0032147 | 16385 | 152  | 1.214400214 | 2.12E-06 | 0.001801802 | 0 | 1.149151543 | 0.00068765  | 0.043243243 | 0.0313836  |
| biological_process | embryonic organ morphogenesis                              | GO:0048562 | 16349 | 188  | 1.19233856  | 2.17E-06 | 0.003603604 | 0 | 1.161841319 | 5.54E-05    | 0.097297297 | 0.00312661 |
| biological_process | neurotransmitter secretion                                 | GO:0007269 | 16465 | 72   | 1.311887081 | 2.18E-06 | 0.028828829 | 0 | 1.304053244 | 3.76E-06    | 0.045045045 | 0          |
| biological_process | regulation of metabolic process                            | GO:0019222 | 12306 | 4231 | 1.035119079 | 2.26E-06 | 0.234234234 | 0 | 1.056530486 | 7.75E-14    | 0.115315315 | 0          |
| biological_process | reproductive behavior                                      | GO:0019098 | 16478 | 59   | 1.344099511 | 2.26E-06 | 0.075675676 | 0 | 1.197716068 | 0.00420489  | 0.209009090 | 0.058032   |
| biological_process | response to hypoxia                                        | GO:0001666 | 16297 | 240  | 1.169583026 | 2.28E-06 | 0.003603604 | 0 | 1.09353569  | 0.012072073 | 0.0648176   | 0.0648176  |
| biological_process | kidney development                                         | GO:0001822 | 16352 | 185  | 1.19333757  | 2.32E-06 | 0.016216216 | 0 | 1.151481329 | 0.000166066 | 0.115315315 | 0.010624   |
| biological_process | cellular polysaccharide biosynthetic process               | GO:0033692 | 16441 | 96   | 1.268837093 | 2.37E-06 | 0.001801802 | 0 | 1.141561608 | 0.00798979  | 0.068468468 | 0.0772702  |
| biological_process | stem cell development                                      | GO:0048864 | 16346 | 191  | 1.189585416 | 2.50E-06 | 0.007207207 | 0 | 1.140945884 | 0.000344979 | 0.108108108 | 0.0140523  |
| biological_process | skeletal muscle tissue development                         | GO:0007519 | 16369 | 168  | 1.201580149 | 2.70E-06 | 0.005405405 | 0 | 1.187953477 | 1.11E-05    | 0.034234234 | 0          |
| biological_process | response to oxygen levels                                  | GO:0070482 | 16275 | 262  | 1.160869546 | 2.73E-06 | 0.005405405 | 0 | 1.092154104 | 0.00460363  | 0.081081081 | 0.0593658  |
| biological_process | defense response                                           | GO:0006952 | 15886 | 651  | 1.100748401 | 2.78E-06 | 0.003603604 | 0 | 0.985469126 | 0.743888    | 0.641441441 | -1         |
| biological_process | positive regulation of blood pressure                      | GO:0045777 | 16504 | 33   | 1.454949722 | 2.93E-06 | 0.009090909 | 0 | 1.089395533 | 0.186643    | 0.227027027 | 0.380955   |
| biological_process | cellular polysaccharide metabolic process                  | GO:0044264 | 16414 | 123  | 1.234972191 | 2.94E-06 | 0.003603604 | 0 | 1.133495777 | 0.00502577  | 0.036036036 | 0.0608052  |
| biological_process | secretion                                                  | GO:0046903 | 15924 | 613  | 1.103344283 | 3.15E-06 | 0.111711712 | 0 | 1.087831981 | 6.19E-05    | 0.165765766 | 0.00305983 |
| molecular_function | transferase activity                                       | GO:0016740 | 15142 | 1719 | 1.059451282 | 3.31E-06 | 0.023423423 | 0 | 1.058043694 | 5.45E-06    | 0.037837838 | 0          |
| biological_process | extracellular matrix organization                          | GO:0030198 | 16394 | 143  | 1.215902653 | 3.54E-06 | 0.025225225 | 0 | 1.113852956 | 0.00893287  | 0.183783784 | 0.0771514  |
| molecular_function | transmembrane receptor protein kinase activity             | GO:0019199 | 16784 | 77   | 1.294633962 | 3.59E-06 | 0.073873874 | 0 | 1.22243284  | 0.000351368 | 0.135135135 | 0          |
| biological_process | ossification                                               | GO:0001503 | 16271 | 266  | 1.157602148 | 3.59E-06 | 0.010810811 | 0 | 1.082186609 | 0.00962701  | 0.203603604 | 0.0783954  |
| biological_process | regulation of stem cell differentiation                    | GO:2000736 | 16481 | 56   | 1.34534333  | 3.67E-06 | 0.007207207 | 0 | 1.173835152 | 0.0120044   | 0.151351351 | 0.092639   |
| biological_process | cellular response to nitrogen compound                     | GO:1901699 | 16264 | 273  | 1.155358329 | 3.68E-06 | 0.005405405 | 0 | 1.093230144 | 0.00356876  | 0.169369369 | 0.0591368  |
| biological_process | cellular response to organic nitrogen                      | GO:0071417 | 16290 | 247  | 1.163458599 | 3.68E-06 | 0.025225225 | 0 | 1.113337084 | 0.000940201 | 0.126126126 | 0.0377578  |
| biological_process | plasma membrane organization                               | GO:0007009 | 16449 | 88   | 1.274401203 | 3.90E-06 | 0.003603604 | 0 | 1.178837226 | 0.0017868   | 0.045045045 | 0.0433507  |
| biological_process | secretion by cell                                          | GO:0032940 | 16013 | 524  | 1.110769633 | 4.04E-06 | 0.100900901 | 0 | 1.08610048  | 0.000261123 | 0.172972973 | 0.0145552  |
| cellular_component | lamellipodium                                              | GO:0030027 | 16707 | 116  | 1.23835884  | 4.06E-06 | 0.027027027 | 0 | 1.244804889 | 2.29E-06    | 0.027027027 | 0          |
| biological_process | immune response                                            | GO:0006955 | 15906 | 631  | 1.100497557 | 4.13E-06 | 0.005405405 | 0 | 1.012953601 | 0.282807    | 0.376576577 | -1         |
| biological_process | insulin receptor signaling pathway                         | GO:0008286 | 16470 | 67   | 1.313610465 | 4.19E-06 | 0.001801802 | 0 | 1.20816684  | 0.00155178  | 0.068468468 | 0.0442956  |
| molecular_function | protein dimerization activity                              | GO:0046983 | 15942 | 919  | 1.08247019  | 4.23E-06 | 0.012612613 | 0 | 1.026199504 | 0.0785659   | 0.142342342 | 0.135976   |
| biological_process | negative regulation of RNA metabolic process               | GO:0051253 | 15767 | 770  | 1.090392846 | 4.31E-06 | 0.001801802 | 0 | 1.101608297 | 2.85E-07    | 0.043243243 | 0          |
| biological_process | cellular component assembly                                | GO:0022607 | 15197 | 1340 | 1.067125297 | 4.51E-06 | 0.012612613 | 0 | 1.024536672 | 0.0523539   | 0.201801802 | 0.188283   |
| cellular_component | stress fiber                                               | GO:0001725 | 16774 | 49   | 1.365324323 | 4.58E-06 | 0.001801802 | 0 | 1.269486936 | 0.000533573 | 0.046846847 | 0          |
| cellular_component | actin filament bundle                                      | GO:0032432 | 16771 | 52   | 1.354542316 | 4.60E-06 | 0.001801802 | 0 | 1.219940576 | 0.00296731  | 0.088288288 | 0          |
| biological_process | response to lipid                                          | GO:0033993 | 15926 | 611  | 1.101592036 | 4.66E-06 | 0.025225225 | 0 | 1.043159732 | 0.0298619   | 0.25045045  | 0.143664   |
| molecular_function | Ras guanyl-nucleotide exchange factor activity             | GO:0005088 | 16751 | 110  | 1.243118726 | 4.69E-06 | 0.030630631 | 0 | 1.275617858 | 2.54E-07    | 0.036036036 | 0          |
| biological_process | phosphatidylinositol-mediated signaling                    | GO:0048015 | 16452 | 85   | 1.276725933 | 4.70E-06 | 0.034234234 | 0 | 1.143240397 | 0.0109164   | 0.236036031 | 0.0855017  |
| biological_process | inositol lipid-mediated signaling                          | GO:0048017 | 16452 | 85   | 1.276725933 | 4.70E-06 | 0.034234234 | 0 | 1.143240397 | 0.0109164   | 0.236036031 | 0.0855017  |
| biological_process | in utero embryonic development                             | GO:0001701 | 16211 | 326  | 1.140155441 | 4.78E-06 | 0.01981982  | 0 | 1.098885783 | 0.000893901 | 0.165765766 | 0.0361922  |
| biological_process | carbohydrate biosynthetic process                          | GO:0016051 | 16359 | 178  | 1.190486605 | 4.8      |             |   |             |             |             |            |

|                    |                                                                               |            |       |      |             |          |             |   |             |             |             |            |
|--------------------|-------------------------------------------------------------------------------|------------|-------|------|-------------|----------|-------------|---|-------------|-------------|-------------|------------|
| biological_process | single-organism carbohydrate metabolic process                                | GO:0044723 | 16026 | 511  | 1.11021206  | 5.84E-06 | 0.027027027 | 0 | 1.056494641 | 0.0123236   | 0.156756757 | 0.0951478  |
| biological_process | regulation of cellular localization                                           | GO:0060341 | 15952 | 585  | 1.102533646 | 6.12E-06 | 0.055855856 | 0 | 1.062377533 | 0.00390082  | 0.187387387 | 0.0594711  |
| biological_process | connective tissue development                                                 | GO:0061448 | 16362 | 175  | 1.189714219 | 6.21E-06 | 0.01981982  | 0 | 1.158782755 | 0.000127268 | 0.099099099 | 0.00816056 |
| biological_process | reproductive structure development                                            | GO:0048608 | 16292 | 245  | 1.159446164 | 6.65E-06 | 0.005405405 | 0 | 1.063320904 | 0.0418591   | 0.201801802 | 0.170372   |
| biological_process | reproductive system development                                               | GO:0061458 | 16292 | 245  | 1.159446164 | 6.65E-06 | 0.005405405 | 0 | 1.063320904 | 0.0418591   | 0.201801802 | 0.170372   |
| biological_process | embryonic organ development                                                   | GO:0048568 | 16235 | 302  | 1.143098678 | 6.89E-06 | 0.012612613 | 0 | 1.136599476 | 1.66E-05    | 0.10990991  | 0          |
| molecular_function | secondary active transmembrane transporter activity                           | GO:0015291 | 16681 | 180  | 1.186053554 | 6.91E-06 | 0.030630631 | 0 | 1.010148382 | 0.406303    | 0.443243243 | -1         |
| biological_process | dendrite morphogenesis                                                        | GO:0048813 | 16465 | 72   | 1.294993272 | 6.96E-06 | 0.117117117 | 0 | 1.354207265 | 9.08E-08    | 0.064864865 | 0          |
| biological_process | central nervous system neuron differentiation                                 | GO:0021953 | 16409 | 128  | 1.220828812 | 6.99E-06 | 0.003603604 | 0 | 1.218854186 | 0.83E-06    | 0.028828829 | 0          |
| biological_process | gland morphogenesis                                                           | GO:0022612 | 16431 | 106  | 1.242642568 | 7.10E-06 | 0.009090909 | 0 | 1.127144886 | 0.0114646   | 0.18555586  | 0.0886274  |
| molecular_function | carboxylic acid transmembrane transporter activity                            | GO:0046943 | 16769 | 92   | 1.260337917 | 7.22E-06 | 0.001801802 | 0 | 1.007569761 | 0.449832    | 0.466666667 | -1         |
| biological_process | lipid metabolic process                                                       | GO:0006629 | 15611 | 926  | 1.079773526 | 7.54E-06 | 0.059459459 | 0 | 1.029879759 | 0.0525322   | 0.225225225 | 0.188796   |
| biological_process | cell-cell junction organization                                               | GO:0045216 | 16432 | 105  | 1.242637244 | 7.79E-06 | 0.048648649 | 0 | 1.25461547  | 2.90E-06    | 0.05045045  | 0          |
| molecular_function | sequence-specific DNA binding                                                 | GO:0043565 | 16283 | 578  | 1.10188655  | 7.89E-06 | 0.010810811 | 0 | 1.090466802 | 6.32E-05    | 0.05045045  | 0          |
| biological_process | glial cell differentiation                                                    | GO:0010001 | 16396 | 141  | 1.208705392 | 8.13E-06 | 0.012612613 | 0 | 1.124763467 | 0.00498324  | 0.014414414 | 0.0608771  |
| molecular_function | transcription factor binding                                                  | GO:0008134 | 16491 | 370  | 1.127314015 | 8.97E-06 | 0.010810811 | 0 | 1.156774167 | 6.40E-08    | 0.003603604 | 0          |
| biological_process | regulation of ERK1 and ERK2 cascade                                           | GO:0070372 | 16433 | 104  | 1.242015519 | 8.99E-06 | 0.003603604 | 0 | 1.019792303 | 0.362931    | 0.412612613 | -1         |
| biological_process | muscle fiber development                                                      | GO:0048747 | 16434 | 103  | 1.24287285  | 9.23E-06 | 0.009090909 | 0 | 1.257713684 | 2.76E-06    | 0.025225225 | 0          |
| biological_process | positive regulation of cellular component movement                            | GO:0051272 | 16305 | 232  | 1.161122858 | 9.31E-06 | 0.048648649 | 0 | 1.090517205 | 0.00808753  | 0.201801802 | 0.0767412  |
| biological_process | ERK1 and ERK2 cascade                                                         | GO:0070371 | 16416 | 121  | 1.223832173 | 9.34E-06 | 0.005405405 | 0 | 1.01910389  | 0.357429    | 0.418018018 | -1         |
| biological_process | digestive system development                                                  | GO:0055123 | 16433 | 104  | 1.241062001 | 9.71E-06 | 0.021621622 | 0 | 1.165234053 | 0.00170659  | 0.090909099 | 0.0437882  |
| biological_process | tube formation                                                                | GO:0035148 | 16417 | 120  | 1.224285509 | 9.73E-06 | 0.018018018 | 0 | 1.157630714 | 0.00134249  | 0.126126126 | 0.0440358  |
| biological_process | pattern specification process                                                 | GO:0007389 | 16181 | 356  | 1.129204315 | 9.83E-06 | 0.036036036 | 0 | 1.125807293 | 1.62E-05    | 0.126126126 | 0          |
| biological_process | cell-substrate junction assembly                                              | GO:0007044 | 16494 | 43   | 1.374845302 | 1.01E-05 | 0.07027027  | 0 | 1.346451122 | 4.07E-05    | 0.122522523 | 0.00321669 |
| biological_process | regulation of endothelial cell migration                                      | GO:0010594 | 16475 | 62   | 1.311872614 | 1.02E-05 | 0.005405405 | 0 | 1.14618132  | 0.0028921   | 0.163963964 | 0.12883    |
| biological_process | regulation of anatomical structure size                                       | GO:0090066 | 16265 | 272  | 1.147859365 | 1.03E-05 | 0.021621622 | 0 | 1.119977852 | 0.000274362 | 0.061261261 | 0.0143821  |
| biological_process | metencephalon development                                                     | GO:0022037 | 16455 | 82   | 1.27082765  | 1.03E-05 | 0.023423423 | 0 | 1.245807583 | 5.56E-05    | 0.063063063 | 0.00311687 |
| biological_process | chondrocyte differentiation                                                   | GO:0002062 | 16470 | 67   | 1.299289713 | 1.06E-05 | 0.012612613 | 0 | 1.201627379 | 0.00208909  | 0.072072072 | 0.0505226  |
| biological_process | regulation of cell-cell adhesion                                              | GO:0022407 | 16466 | 71   | 1.290675866 | 1.06E-05 | 0.007207207 | 0 | 1.254593246 | 9.82E-05    | 0.010810811 | 0.00867783 |
| biological_process | morphogenesis of embryonic epithelium                                         | GO:0016331 | 16399 | 138  | 1.207841551 | 1.08E-05 | 0.016216216 | 0 | 1.189876716 | 5.23E-05    | 0.07027027  | 0.00315612 |
| biological_process | negative regulation of catalytic activity                                     | GO:0043086 | 16162 | 375  | 1.125099063 | 1.10E-05 | 0.027027027 | 0 | 1.030035258 | 0.154125    | 0.318918919 | 0.345277   |
| biological_process | myeloid cell differentiation                                                  | GO:0030099 | 16300 | 237  | 1.15785383  | 1.12E-05 | 0.001801802 | 0 | 1.1309677   | 0.000217798 | 0.023423423 | 0.015138   |
| biological_process | neural tube closure                                                           | GO:0001843 | 16463 | 74   | 1.283841967 | 1.12E-05 | 0.005405405 | 0 | 1.191454921 | 0.00212467  | 0.115315315 | 0.0501934  |
| biological_process | regulation of dendrite morphogenesis                                          | GO:0048814 | 16495 | 42   | 1.376453604 | 1.16E-05 | 0.055855856 | 0 | 1.413206025 | 1.71E-06    | 0.034234234 | 0          |
| biological_process | regulation of heart contraction                                               | GO:0008016 | 16436 | 101  | 1.242255684 | 1.17E-05 | 0.025225225 | 0 | 1.198527862 | 0.000263758 | 0.066666667 | 0.0145202  |
| biological_process | regulation of cellular metabolic process                                      | GO:0031323 | 12682 | 3855 | 1.034429664 | 1.18E-05 | 0.255855856 | 0 | 1.064793355 | 8.85E-16    | 0.100909091 | 0          |
| biological_process | amino acid transport                                                          | GO:0006865 | 16432 | 105  | 1.237235525 | 1.20E-05 | 0.046846847 | 0 | 1.053073763 | 0.172348    | 0.358558559 | 0.365519   |
| cellular_component | Golgi apparatus                                                               | GO:0005794 | 15843 | 980  | 1.075531646 | 1.22E-05 | 0.135135135 | 0 | 1.076470538 | 9.65E-06    | 0.081081081 | 0          |
| molecular_function | actin filament binding                                                        | GO:0051015 | 16785 | 76   | 1.278523376 | 1.25E-05 | 0.014414414 | 0 | 1.201406608 | 0.0011514   | 0.088288288 | 0          |
| biological_process | negative regulation of cell proliferation                                     | GO:0008285 | 16116 | 421  | 1.116855726 | 1.29E-05 | 0.010810811 | 0 | 1.054938089 | 0.0239839   | 0.25045045  | 0.133482   |
| biological_process | negative regulation of neurogenesis                                           | GO:0050768 | 16451 | 86   | 1.260793283 | 1.33E-05 | 0.001801802 | 0 | 1.104554981 | 0.0461134   | 0.207207207 | 0.179149   |
| biological_process | positive regulation of endothelial cell migration                             | GO:0010595 | 16500 | 37   | 1.398042892 | 1.34E-05 | 0.001801802 | 0 | 1.185045419 | 0.0254834   | 0.151351351 | 0.136448   |
| biological_process | actin filament organization                                                   | GO:0007015 | 16342 | 195  | 1.172241248 | 1.39E-05 | 0.025225225 | 0 | 1.158498183 | 5.75E-05    | 0.009090909 | 0.00308805 |
| biological_process | tube closure                                                                  | GO:0060606 | 16462 | 75   | 1.278562707 | 1.41E-05 | 0.005405405 | 0 | 1.195942205 | 0.0016104   | 0.104504505 | 0.044075   |
| molecular_function | transmembrane receptor protein tyrosine kinase activity                       | GO:0004714 | 16800 | 61   | 1.308960163 | 1.41E-05 | 0.059459459 | 0 | 1.19478543  | 0.00414723  | 0.158558559 | 0          |
| biological_process | regulation of vasoconstriction                                                | GO:0019229 | 16497 | 40   | 1.380343792 | 1.51E-05 | 0.016216216 | 0 | 1.15004009  | 0.0499241   | 0.095495495 | 0.183628   |
| biological_process | positive regulation of cell motility                                          | GO:2000147 | 16312 | 225  | 1.159289526 | 1.54E-05 | 0.048648649 | 0 | 1.084326565 | 0.013698    | 0.214414414 | 0.0994506  |
| biological_process | epithelial tube formation                                                     | GO:0072175 | 16424 | 113  | 1.224986587 | 1.61E-05 | 0.021621622 | 0 | 1.170116794 | 0.000836322 | 0.108108108 | 0.0343771  |
| cellular_component | perinuclear region of cytoplasm                                               | GO:0048471 | 16377 | 446  | 1.112115684 | 1.62E-05 | 0.077477747 | 0 | 1.078699278 | 0.00176328  | 0.090909099 | 0          |
| molecular_function | forebrain development                                                         | GO:0030900 | 16257 | 280  | 1.142133644 | 1.63E-05 | 0.061261261 | 0 | 1.119524984 | 0.000238012 | 0.189189189 | 0.0147677  |
| molecular_function | active transmembrane transporter activity                                     | GO:0022804 | 16563 | 298  | 1.137481534 | 1.68E-05 | 0.046846847 | 0 | 1.10121463  | 0.378985    | 0.448648649 | -1         |
| biological_process | carbohydrate derivative metabolic process                                     | GO:1901135 | 15296 | 1241 | 1.065252229 | 1.74E-05 | 0.037837838 | 0 | 1.051638626 | 0.000526798 | 0.066666667 | 0.0281121  |
| biological_process | morphogenesis of an epithelial sheet                                          | GO:0002011 | 16506 | 31   | 1.42867536  | 1.75E-05 | 0.009090909 | 0 | 1.33362123  | 0.000640099 | 0.03963964  | 0.0317059  |
| biological_process | embryonic epithelial tube formation                                           | GO:0001838 | 16425 | 112  | 1.224899537 | 1.76E-05 | 0.010810811 | 0 | 1.164270567 | 0.00125801  | 0.115315315 | 0.0427301  |
| molecular_function | beta-catenin binding                                                          | GO:0008013 | 16800 | 61   | 1.305174366 | 1.77E-05 | 0.025225225 | 0 | 1.304163264 | 1.88E-05    | 0.066666667 | 0          |
| biological_process | positive regulation of cell migration                                         | GO:0030335 | 16317 | 220  | 1.15986158  | 1.78E-05 | 0.045045045 | 0 | 1.089247114 | 0.0104957   | 0.205405405 | 0.0848387  |
| molecular_function | protein kinase binding                                                        | GO:0019901 | 16500 | 361  | 1.12413665  | 1.82E-05 | 0.045045045 | 0 | 1.14452705  | 7.62E-07    | 0.034234234 | 0          |
| biological_process | skeletal muscle fiber development                                             | GO:0048741 | 16450 | 87   | 1.254551329 | 1.87E-05 | 0.010810811 | 0 | 1.243561625 | 3.99E-05    | 0.037837838 | 0.00322704 |
| molecular_function | kinase binding                                                                | GO:0019900 | 16461 | 400  | 1.117569806 | 1.88E-05 | 0.05045045  | 0 | 1.124721987 | 6.13E-06    | 0.064864865 | 0          |
| biological_process | carbohydrate metabolic process                                                | GO:0005975 | 15911 | 626  | 1.093285934 | 1.88E-05 | 0.021621622 | 0 | 1.049682076 | 0.0140855   | 0.169369369 | 0.100497   |
| biological_process | sex differentiation                                                           | GO:0007548 | 16307 | 230  | 1.155456093 | 1.96E-05 | 0.003603604 | 0 | 1.085130338 | 0.0121639   | 0.111711712 | 0.0944347  |
| biological_process | positive regulation of locomotion                                             | GO:0040017 | 16305 | 232  | 1.154726908 | 1.97E-05 | 0.045045045 | 0 | 1.09392108  | 0.00629085  | 0.192792793 | 0.0645736  |
| biological_process | regulation of primary metabolic process                                       | GO:0080090 | 12745 | 3792 | 1.033810364 | 2.00E-05 | 0.248648649 | 0 | 1.061990029 | 2.52E-14    | 0.106306306 | 0          |
| cellular_component | proteinaceous extracellular matrix                                            | GO:0005578 | 16514 | 309  | 1.133544614 | 2.03E-05 | 0.118918919 | 0 | 1.08686678  | 0.00379766  | 0.142342342 | 0          |
| molecular_function | sequence-specific DNA binding RNA polymerase II transcription factor activity | GO:0000981 | 16658 | 203  | 1.165117986 | 2.07E-05 | 0.003603604 | 0 | 1.184977852 | 2.19E-06    | 0.028828829 | 0          |
| biological_process | activation of JUN kinase activity                                             | GO:0007257 | 16512 | 25   | 1.472860122 | 2.08E-05 | 0.001801802 | 0 | 1.354233534 | 0.00106991  | 0.041441441 | 0.0407909  |
| biological_process | regulation of cellular response to stress                                     | GO:0008135 | 16271 | 266  | 1.143785665 | 2.11E-05 | 0.027027027 | 0 | 1.097393076 | 0.00264401  | 0.136936937 | 0.0526194  |
| molecular_function | sodium ion transmembrane transporter activity                                 | GO:0015081 | 16755 | 106  | 1.228732131 | 2.14E-05 | 0.043243243 | 0 | 1.135298807 | 0.00775018  | 0.16036036  | 0          |
| biological_process | vesicle-mediated transport                                                    | GO:0016192 | 15789 | 748  | 1.084370628 | 2.15E-05 | 0.167567568 | 0 | 1.083733622 | 2.46E-05    | 0.163963964 | 0.00333415 |
| biological_process | positive regulation of cell projection organization                           | GO:0031346 | 16391 | 146  | 1.194554656 | 2.16E-05 | 0.032432432 | 0 | 1.204287358 | 8.76E-06    | 0.054054054 | 0          |
| biological_process | defense response to Gram-positive bacterium                                   | GO:0050830 | 16502 | 35   | 1.398653632 | 2.16E-05 | 0.005405405 | 0 | 0.850152256 | 0.937878    | 0.87027027  | -1         |
| biological_process | positive regulation of Ras GTPase activity                                    | GO:0032320 | 16442 | 95   | 1.241516165 | 2.17E-05 | 0.016216216 | 0 | 1.179167682 | 0.00120896  | 0.055855856 | 0.0412442  |
| biological_process | primary neural tube formation                                                 | GO:0014020 | 16458 | 79   | 1.246423761 | 2.22E-05 | 0.009090909 | 0 | 1.182783585 | 0.00239613  | 0.131531532 | 0.0504163  |
| biological_process | neuromuscular process                                                         | GO:0050905 | 16457 | 80   | 1.262945591 | 2.22E-05 | 0.041441441 | 0 | 1.192141753 | 0.00142304  | 0.18018018  | 0.0434175  |
| biological_process | positive regulation of neurological system process                            | GO:0031646 | 16477 | 60   | 1.303132466 | 2.31E-05 | 0.037837838 | 0 | 1.098705619 | 0.0923104   | 0.27027027  | 0.253372   |
| biological_process | developmental maturation                                                      | GO:0021700 | 16370 | 167  | 1.180931451 | 2.35E-05 | 0.010810811 | 0 | 1.186094682 | 1.42E-05    | 0.012612613 | 0          |
| biological_process | organelle localization                                                        |            |       |      |             |          |             |   |             |             |             |            |

|                    |                                                                           |            |       |     |             |             |             |   |             |             |             |            |
|--------------------|---------------------------------------------------------------------------|------------|-------|-----|-------------|-------------|-------------|---|-------------|-------------|-------------|------------|
| biological_process | activation of MAPK activity                                               | GO:0000187 | 16454 | 83  | 1.255762712 | 2.60E-05    | 0.003603604 | 0 | 1.152661371 | 0.00786706  | 0.086486486 | 0.0764909  |
| biological_process | cellular response to peptide hormone stimulus                             | GO:0071375 | 16381 | 156 | 1.186099045 | 2.61E-05    | 0.03963964  | 0 | 1.16442395  | 0.000175786 | 0.063063063 | 0.0130727  |
| biological_process | cellular response to peptide                                              | GO:1901653 | 16381 | 156 | 1.186099045 | 2.61E-05    | 0.03963964  | 0 | 1.16442395  | 0.000175786 | 0.063063063 | 0.0130727  |
| biological_process | generation of a signal involved in cell-cell signaling                    | GO:0003001 | 16263 | 274 | 1.139820681 | 2.65E-05    | 0.093693694 | 0 | 1.121521688 | 0.000221294 | 0.127927928 | 0.0150624  |
| biological_process | signal release                                                            | GO:0023061 | 16263 | 274 | 1.139820681 | 2.65E-05    | 0.093693694 | 0 | 1.121521688 | 0.000221294 | 0.127927928 | 0.0150624  |
| biological_process | regulation of cartilage development                                       | GO:0061035 | 16493 | 44  | 1.351355085 | 2.65E-05    | 0.007207207 | 0 | 1.186552266 | 0.0159292   | 0.05045045  | 0.108409   |
| biological_process | patterning of blood vessels                                               | GO:0001569 | 16503 | 34  | 1.399327407 | 2.70E-05    | 0.009090909 | 0 | 1.297564997 | 0.00131321  | 0.108108108 | 0.0441097  |
| molecular_function | organic anion transmembrane transporter activity                          | GO:0008514 | 16760 | 101 | 1.231018801 | 2.75E-05    | 0.005405405 | 0 | 0.98949485  | 0.5727773   | 0.511711712 | -1         |
| biological_process | muscle cell proliferation                                                 | GO:0033002 | 16430 | 107 | 1.224372065 | 2.75E-05    | 0.007207207 | 0 | 1.11463519  | 0.0196744   | 0.162162162 | 0.122942   |
| biological_process | response to cytokine stimulus                                             | GO:0034097 | 16179 | 358 | 1.121588608 | 2.81E-05    | 0.005405405 | 0 | 1.05438916  | 0.0357779   | 0.189189189 | 0.157101   |
| biological_process | cellular response to vascular endothelial growth factor stimulus          | GO:0035924 | 16517 | 20  | 1.51862276  | 2.91E-05    | 0.010810811 | 0 | 1.323755746 | 0.00604789  | 0.086486486 | 0.0650168  |
| biological_process | positive regulation of transport                                          | GO:0051050 | 16097 | 440 | 1.108934621 | 3.02E-05    | 0.099090909 | 0 | 1.09693192  | 0.000178847 | 0.144144144 | 0.0130389  |
| biological_process | single-organism reproductive behavior                                     | GO:0044704 | 16491 | 46  | 1.340882105 | 3.03E-05    | 0.129727973 | 0 | 1.227033252 | 0.00378386  | 0.18018018  | 0.0584148  |
| molecular_function | Rho guanyl-nucleotide exchange factor activity                            | GO:0005089 | 16786 | 75  | 1.266262622 | 3.13E-05    | 0.048648649 | 0 | 1.344874146 | 1.08E-07    | 0.027027027 | 0          |
| cellular_component | excitatory synapse                                                        | GO:0060076 | 16802 | 21  | 1.503918114 | 3.14E-05    | 0.021621622 | 0 | 1.238792188 | 0.0289426   | 0.246846847 | 0.0148337  |
| biological_process | canonical Wnt receptor signaling pathway                                  | GO:0060070 | 16365 | 172 | 1.175267627 | 3.14E-05    | 0.003603604 | 0 | 1.133489146 | 0.00115127  | 0.127927928 | 0.0418586  |
| biological_process | positive regulation of immune system process                              | GO:0002684 | 16160 | 377 | 1.117491183 | 3.21E-05    | 0.009090909 | 0 | 1.037241685 | 0.102606    | 0.216216216 | 0.264093   |
| biological_process | skeletal system development                                               | GO:0001501 | 16238 | 299 | 1.131837156 | 3.38E-05    | 0.01981982  | 0 | 1.139186222 | 1.29E-05    | 0.086486486 | 0          |
| biological_process | regulation of chondrocyte differentiation                                 | GO:0032330 | 16505 | 32  | 1.406269775 | 3.38E-05    | 0.003603604 | 0 | 1.151907764 | 0.1099091   | 0.0681361   | 0.218813   |
| biological_process | cardiac chamber morphogenesis                                             | GO:0003206 | 16442 | 95  | 1.235218685 | 3.41E-05    | 0.005405405 | 0 | 1.111818897 | 0.029169    | 0.190990991 | 0.143301   |
| biological_process | learning                                                                  | GO:0007612 | 16446 | 91  | 1.240107819 | 3.47E-05    | 0.147747748 | 0 | 1.193699725 | 0.000665276 | 0.14954955  | 0.031445   |
| biological_process | positive regulation of GTPase activity                                    | GO:0043547 | 16396 | 141 | 1.192452204 | 3.52E-05    | 0.043243243 | 0 | 1.177957277 | 0.000118556 | 0.05045045  | 0.00836475 |
| cellular_component | basolateral plasma membrane                                               | GO:0016323 | 16672 | 151 | 1.185692474 | 3.59E-05    | 0.036036036 | 0 | 1.05556452  | 0.117427    | 0.327927928 | 0.200364   |
| biological_process | positive regulation of epithelial cell proliferation                      | GO:0050679 | 16428 | 109 | 1.21828254  | 3.74E-05    | 0.023423423 | 0 | 1.146054981 | 0.00402696  | 0.084684685 | 0.0588205  |
| biological_process | regulation of synapse assembly                                            | GO:0051963 | 16506 | 31  | 1.409041139 | 3.93E-05    | 0.020727027 | 0 | 1.321262555 | 0.000964066 | 0.126126126 | 0.0373181  |
| biological_process | exocrine system development                                               | GO:0035272 | 16492 | 45  | 1.339268892 | 3.95E-05    | 0.001801802 | 0 | 1.14945356  | 0.0410303   | 0.120720721 | 0.167161   |
| cellular_component | myosin complex                                                            | GO:0016459 | 16765 | 58  | 1.298580723 | 3.98E-05    | 0.003603604 | 0 | 1.084742003 | 0.131406    | 0.236036036 | 0.230839   |
| biological_process | response to bacterium                                                     | GO:0009617 | 16240 | 297 | 1.130936568 | 4.01E-05    | 0.007207207 | 0 | 1.026603501 | 0.211499    | 0.286486486 | 0.409422   |
| molecular_function | extracellular matrix structural constituent                               | GO:0005201 | 16832 | 29  | 1.422133516 | 4.06E-05    | 0.032432432 | 0 | 1.231474128 | 0.0153498   | 0.07027027  | 0.0239228  |
| biological_process | cardiocyte differentiation                                                | GO:0035051 | 16450 | 87  | 1.24280127  | 4.20E-05    | 0.007207207 | 0 | 1.216311162 | 0.000229273 | 0.01981982  | 0.0149507  |
| molecular_function | transcription regulatory region DNA binding                               | GO:0044212 | 16564 | 297 | 1.130548681 | 4.22E-05    | 0.009090909 | 0 | 1.187804948 | 7.74E-09    | 0.001801802 | 0          |
| biological_process | nucleus localization                                                      | GO:0051647 | 16516 | 21  | 1.494646441 | 4.27E-05    | 0.012612613 | 0 | 1.455676896 | 0.000147775 | 0.025225225 | 0.0107078  |
| biological_process | development of primary sexual characteristics                             | GO:0045137 | 16333 | 204 | 1.157468876 | 4.43E-05    | 0.007207207 | 0 | 1.066537173 | 0.048841    | 0.151351351 | 0.182095   |
| cellular_component | synaptic vesicle                                                          | GO:0008021 | 16719 | 104 | 1.221127069 | 4.46E-05    | 0.097297297 | 0 | 1.107909626 | 0.0279369   | 0.201801802 | 0.0150132  |
| biological_process | digestive tract development                                               | GO:0048565 | 16440 | 97  | 1.22898126  | 4.47E-05    | 0.036036036 | 0 | 1.160815622 | 0.00296708  | 0.104504505 | 0.0573479  |
| biological_process | regulation of sequence-specific DNA binding transcription factor activity | GO:0051090 | 16269 | 268 | 1.136815776 | 4.59E-05    | 0.003603604 | 0 | 1.094700959 | 0.00339258  | 0.063063063 | 0.0574087  |
| biological_process | negative regulation of cellular component organization                    | GO:0051129 | 16258 | 279 | 1.133814842 | 4.72E-05    | 0.001801802 | 0 | 1.126784198 | 0.000108071 | 0.016216216 | 0.00848227 |
| biological_process | cardiac chamber development                                               | GO:0003205 | 16431 | 106 | 1.217873915 | 4.86E-05    | 0.007207207 | 0 | 1.104127494 | 0.0312438   | 0.212612613 | 0.146745   |
| biological_process | reproductive process                                                      | GO:0022414 | 15578 | 959 | 1.070171393 | 5.27E-05    | 0.045045045 | 0 | 1.050519302 | 0.00262088  | 0.189189189 | 0.0526977  |
| cellular_component | clathrin-coated vesicle membrane                                          | GO:0030665 | 16744 | 79  | 1.251165373 | 5.31E-05    | 0.081081081 | 0 | 1.18288434  | 0.00238503  | 0.075675676 | 0          |
| molecular_function | regulatory region DNA binding                                             | GO:0000975 | 16557 | 304 | 1.127095122 | 5.37E-05    | 0.009090909 | 0 | 1.179252295 | 2.34E-08    | 0.001801802 | 0          |
| molecular_function | regulatory region nucleic acid binding                                    | GO:0001067 | 16557 | 304 | 1.127095122 | 5.37E-05    | 0.009090909 | 0 | 1.179252295 | 2.34E-08    | 0.001801802 | 0          |
| biological_process | response to hormone stimulus                                              | GO:0009725 | 15903 | 634 | 1.086887721 | 5.58E-05    | 0.066666667 | 0 | 1.050119205 | 0.0129126   | 0.201801802 | 0.0980354  |
| cellular_component | growth cone                                                               | GO:0030426 | 16721 | 102 | 1.22016466  | 5.60E-05    | 0.099090909 | 0 | 1.223626104 | 4.36E-05    | 0.068468468 | 0          |
| biological_process | regulation of cell-substrate adhesion                                     | GO:0010810 | 16441 | 96  | 1.226754578 | 5.68E-05    | 0.025225225 | 0 | 1.154933634 | 0.00418239  | 0.169363969 | 0.0581912  |
| biological_process | symporter activity                                                        | GO:0015293 | 16743 | 118 | 1.204011795 | 5.86E-05    | 0.037837838 | 0 | 1.043043996 | 0.208201    | 0.342342342 | 0.378976   |
| molecular_function | multi-organ complex                                                       | GO:0051704 | 15798 | 739 | 1.079909599 | 5.92E-05    | 0.005405405 | 0 | 1.027685418 | 0.0911685   | 0.261261261 | 0.251348   |
| biological_process | cation channel complex                                                    | GO:0034703 | 16723 | 100 | 1.221541312 | 5.93E-05    | 0.122522523 | 0 | 1.299501411 | 9.80E-08    | 0.05045045  | 0          |
| cellular_component | neural tube development                                                   | GO:0021915 | 16402 | 135 | 1.190223549 | 6.05E-05    | 0.030630631 | 0 | 1.175783133 | 0.000191139 | 0.077477477 | 0.0129055  |
| biological_process | organic acid transport                                                    | GO:0015849 | 16356 | 181 | 1.163505424 | 6.38E-05    | 0.045045045 | 0 | 1.00279014  | 0.473977    | 0.466666667 | -1         |
| biological_process | carboxylic acid transport                                                 | GO:0046942 | 16356 | 181 | 1.163505424 | 6.38E-05    | 0.045045045 | 0 | 1.00279014  | 0.473977    | 0.466666667 | -1         |
| biological_process | platelet activation                                                       | GO:0030168 | 16495 | 42  | 1.339735735 | 6.72E-05    | 0.001801802 | 0 | 1.06608511  | 0.228827    | 0.272072072 | 0.427272   |
| molecular_function | growth factor binding                                                     | GO:0019838 | 16770 | 91  | 1.230398548 | 6.75E-05    | 0.03963964  | 0 | 1.146150279 | 0.0077304   | 0.133333333 | 0          |
| cellular_component | myelin sheath                                                             | GO:0043209 | 16785 | 38  | 1.356699805 | 6.87E-05    | 0.048648649 | 0 | 1.09084199  | 0.165767    | 0.257657658 | 0.293172   |
| cellular_component | Golgi apparatus part                                                      | GO:0044431 | 16330 | 493 | 1.097560918 | 7.00E-05    | 0.154954955 | 0 | 1.112957168 | 5.19E-06    | 0.030630631 | 0          |
| biological_process | regulation of epithelial cell migration                                   | GO:0010632 | 16451 | 86  | 1.236022904 | 7.20E-05    | 0.016216216 | 0 | 1.170039341 | 0.00308729  | 0.158558559 | 0.0569382  |
| biological_process | cellular response to oxygen-containing compound                           | GO:1901701 | 16071 | 466 | 1.100130962 | 7.30E-05    | 0.041441441 | 0 | 1.08206612  | 0.000927451 | 0.108108108 | 0.0360545  |
| biological_process | olfactory lobe development                                                | GO:0021988 | 16507 | 30  | 1.399484622 | 7.43E-05    | 0.041441441 | 0 | 1.344225842 | 0.000540373 | 0.063063063 | 0.0279934  |
| biological_process | defense response to bacterium                                             | GO:0042742 | 16454 | 83  | 1.239655177 | 7.49E-05    | 0.009090909 | 0 | 0.900296866 | 0.942645    | 0.890090909 | -1         |
| biological_process | response to insulin stimulus                                              | GO:0032868 | 16367 | 170 | 1.166643262 | 7.75E-05    | 0.100909091 | 0 | 1.142598736 | 0.006063895 | 0.088288288 | 0.0297742  |
| biological_process | regulation of secretion                                                   | GO:0051046 | 16156 | 381 | 1.110390034 | 7.97E-05    | 0.075675676 | 0 | 1.068859836 | 0.00925373  | 0.144144144 | 0.0775906  |
| cellular_component | neuron projection terminus                                                | GO:0044306 | 16738 | 85  | 1.235650016 | 8.08E-05    | 0.054054054 | 0 | 1.252050965 | 0.273E-05   | 0.021621622 | 0          |
| biological_process | regulation of angiogenesis                                                | GO:0045765 | 16399 | 138 | 1.184583662 | 8.11E-05    | 0.03963964  | 0 | 1.061967094 | 0.102739    | 0.21981982  | 0.263999   |
| cellular_component | coated vesicle membrane                                                   | GO:0030662 | 16717 | 106 | 1.210714904 | 8.18E-05    | 0.084684685 | 0 | 1.170217928 | 0.00116271  | 0.081081081 | 0          |
| biological_process | cell activation                                                           | GO:0001775 | 16027 | 510 | 1.094874856 | 8.18E-05    | 0.030630631 | 0 | 1.089207557 | 0.00019675  | 0.034234234 | 0.0128398  |
| biological_process | nerve development                                                         | GO:0021675 | 16488 | 49  | 1.309753228 | 8.46E-05    | 0.003603604 | 0 | 1.29073854  | 0.000207551 | 0.036036036 | 0.0127426  |
| biological_process | positive regulation of transmission of nerve impulse                      | GO:0051971 | 16482 | 55  | 1.292116111 | 8.54E-05    | 0.048648649 | 0 | 1.090567493 | 0.121954    | 0.284684685 | 0.297336   |
| molecular_function | SH3 domain binding                                                        | GO:0017124 | 16744 | 117 | 1.199714482 | 8.68E-05    | 0.072072072 | 0 | 1.234658804 | 5.13E-06    | 0.034234234 | 0          |
| biological_process | adult behavior                                                            | GO:0030534 | 16423 | 114 | 1.202126473 | 8.81E-05    | 0.099090909 | 0 | 1.148321448 | 0.00295809  | 0.136936937 | 0.0575238  |
| biological_process | muscle system process                                                     | GO:0003012 | 16339 | 198 | 1.152507205 | 9.23E-05    | 0.007207207 | 0 | 1.091704273 | 0.0122717   | 0.093693694 | 0.0952339  |
| biological_process | BMP signaling pathway                                                     | GO:0030509 | 16450 | 87  | 1.230668948 | 9.33E-05    | 0.009090909 | 0 | 1.21535064  | 0.000243039 | 0.046846847 | 0.0146959  |
| biological_process | synaptic transmission, glutamatergic                                      | GO:0035249 | 16480 | 57  | 1.285150852 | 9.37E-05    | 0.095495495 | 0 | 1.174301043 | 0.0112086   | 0.190990991 | 0.0882321  |
| molecular_function | GTPase binding                                                            | GO:0051020 | 16720 | 141 | 1.180833734 | 9.39E-05    | 0.118918919 | 0 | 1.221119063 | 2.47E-06    | 0.046846847 | 0          |
| cellular_component | cytoplasmic vesicle membrane                                              | GO:0030659 | 16570 | 253 | 1.134165241 | 9.79E-05    | 0.124324324 | 0 | 1.10717104  | 0.00146482  | 0.063063063 | 0          |
| biological_process | membrane depolarization                                                   | GO:0051899 | 16467 | 70  | 1.255882398 | 0.000101201 | 0.081081081 | 0 | 1.260761221 | 7.63E-05    | 0.057657658 | 0.00599209 |
| biological_process | innate immune response                                                    | GO:0045087 | 16263 | 274 | 1.128517323 | 0.000101368 | 0.012612613 | 0 | 0.994858762 |             |             |            |

|                    |                                                                                               |            |       |      |             |             |             |   |             |             |             |            |
|--------------------|-----------------------------------------------------------------------------------------------|------------|-------|------|-------------|-------------|-------------|---|-------------|-------------|-------------|------------|
| biological_process | peptidyl-amino acid modification                                                              | GO:0018193 | 15999 | 538  | 1.090289766 | 0.000113092 | 0.075675676 | 0 | 1.115371209 | 1.22E-06    | 0.016216216 | 0          |
| molecular_function | Ras GTPase activator activity                                                                 | GO:0005099 | 16771 | 90   | 1.223803153 | 0.000113278 | 0.086486486 | 0 | 1.222935982 | 0.000119807 | 0.106306306 | 0          |
| biological_process | associative learning                                                                          | GO:0008306 | 16481 | 56   | 1.283751208 | 0.000114747 | 0.117171717 | 0 | 1.217947991 | 0.00232927  | 0.113513514 | 0.0507299  |
| biological_process | regulation of response to stress                                                              | GO:0008134 | 15989 | 548  | 1.089317491 | 0.000115248 | 0.014414414 | 0 | 1.044040064 | 0.0346927   | 0.2         | 0.154837   |
| biological_process | positive regulation of synaptic transmission                                                  | GO:0050806 | 16483 | 54   | 1.288773568 | 0.000115912 | 0.059459459 | 0 | 1.110109248 | 0.0801986   | 0.246846847 | 0.23735    |
| biological_process | embryonic skeletal system development                                                         | GO:0048706 | 16448 | 89   | 1.224383456 | 0.000118276 | 0.001801802 | 0 | 1.084344592 | 0.0835016   | 0.214414414 | 0.243945   |
| biological_process | nephron development                                                                           | GO:0072006 | 16459 | 78   | 1.239585986 | 0.000119545 | 0.037837838 | 0 | 1.147090075 | 0.0120551   | 0.212612613 | 0.0925543  |
| molecular_function | voltage-gated cation channel activity                                                         | GO:0022843 | 16738 | 123  | 1.190487284 | 0.000120043 | 0.176576577 | 0 | 1.239580239 | 1.93E-06    | 0.113513514 | 0          |
| biological_process | hindbrain morphogenesis                                                                       | GO:0021575 | 16503 | 34   | 1.363022307 | 0.000121196 | 0.007207207 | 0 | 1.362652391 | 0.000122981 | 0.009009009 | 0.00829567 |
| cellular_component | extracellular organelle                                                                       | GO:0043230 | 16760 | 63   | 1.266194477 | 0.000122933 | 0.043243243 | 0 | 1.069851657 | 0.167997    | 0.344144144 | 0.295102   |
| cellular_component | extracellular membrane-bounded organelle                                                      | GO:0065010 | 16760 | 63   | 1.266194477 | 0.000122933 | 0.043243243 | 0 | 1.069851657 | 0.167997    | 0.344144144 | 0.295102   |
| cellular_component | cytoplasmic vesicle part                                                                      | GO:0044433 | 16561 | 262  | 1.129543826 | 0.000125855 | 0.131531532 | 0 | 1.104393445 | 0.00158936  | 0.066666667 | 0          |
| biological_process | developmental process involved in reproduction                                                | GO:0003006 | 16140 | 397  | 1.104758056 | 0.000126373 | 0.016216216 | 0 | 1.054057159 | 0.0294954   | 0.209009009 | 0.142933   |
| biological_process | regulation of cell death                                                                      | GO:0010941 | 15527 | 1010 | 1.064382113 | 0.000127454 | 0.012612613 | 0 | 1.03792271  | 0.0156127   | 0.135135135 | 0.108176   |
| biological_process | heart process                                                                                 | GO:0003015 | 16413 | 124  | 1.188830063 | 0.000128201 | 0.023423423 | 0 | 1.146015523 | 0.00235002  | 0.100900901 | 0.0504871  |
| biological_process | heart contraction                                                                             | GO:0060047 | 16413 | 124  | 1.188830063 | 0.000128201 | 0.023423423 | 0 | 1.146015523 | 0.00235002  | 0.100900901 | 0.0504871  |
| biological_process | somatic stem cell maintenance                                                                 | GO:0035019 | 16499 | 38   | 1.341953768 | 0.000128433 | 0.021621622 | 0 | 1.302382888 | 0.000613956 | 0.066666667 | 0.0297129  |
| biological_process | positive regulation of catabolic process                                                      | GO:0009896 | 16415 | 122  | 1.190327669 | 0.000128782 | 0.012612613 | 0 | 1.159281331 | 0.00111229  | 0.028828829 | 0.0422512  |
| biological_process | cerebellar cortex development                                                                 | GO:0021695 | 16501 | 36   | 1.351078097 | 0.000129832 | 0.001801802 | 0 | 1.356802307 | 0.000102778 | 0.009009009 | 0.00855445 |
| biological_process | transmembrane receptor protein serine/threonine kinase signaling pathway                      | GO:0007178 | 16333 | 204  | 1.14669745  | 0.000130234 | 0.055855856 | 0 | 1.197543087 | 4.39E-07    | 0.045045045 | 0          |
| biological_process | axis elongation                                                                               | GO:0003401 | 16510 | 27   | 1.405284527 | 0.000130819 | 0.050405405 | 0 | 1.274308517 | 0.00674035  | 0.093693694 | 0.0707988  |
| molecular_function | non-membrane spanning protein tyrosine kinase activity                                        | GO:0004715 | 16819 | 42   | 1.324638947 | 0.000131789 | 0.001801802 | 0 | 1.07893275  | 0.187505    | 0.246846847 | 0.346149   |
| biological_process | cardiac muscle tissue development                                                             | GO:0048738 | 16403 | 134  | 1.181227436 | 0.000131932 | 0.003603604 | 0 | 1.139712777 | 0.0024573   | 0.073873874 | 0.0501862  |
| cellular_component | extracellular space                                                                           | GO:0005615 | 16226 | 597  | 1.084651926 | 0.000132211 | 0.133333333 | 0 | 1.004505948 | 0.423034    | 0.472072072 | -1         |
| biological_process | positive regulation of cell-substrate adhesion                                                | GO:0010811 | 16481 | 56   | 1.28095029  | 0.000132271 | 0.003603604 | 0 | 1.111705305 | 0.0734866   | 0.254054054 | 0.228028   |
| biological_process | Schwann cell differentiation                                                                  | GO:0014037 | 16513 | 24   | 1.429006629 | 0.000134774 | 0.009090909 | 0 | 1.135081561 | 0.125687    | 0.12972973  | 0.301061   |
| biological_process | salivary gland morphogenesis                                                                  | GO:0007435 | 16504 | 33   | 1.365385262 | 0.000136734 | 0.001801802 | 0 | 1.217842108 | 0.0150158   | 0.099090909 | 0.105805   |
| molecular_function | RNA polymerase II distal enhancer sequence-specific DNA binding transcription factor activity | GO:0003705 | 16787 | 74   | 1.243593458 | 0.00013763  | 0.010810811 | 0 | 1.303730314 | 2.87E-06    | 0.003603604 | 0          |
| biological_process | cerebellum morphogenesis                                                                      | GO:0021587 | 16506 | 31   | 1.375671155 | 0.000143762 | 0.007207207 | 0 | 1.35371188  | 0.000319711 | 0.014414414 | 0.0142501  |
| cellular_component | extracellular region                                                                          | GO:0005576 | 15451 | 1372 | 1.054165864 | 0.000143971 | 0.163963964 | 0 | 1.006891987 | 0.322376    | 0.405405405 | -1         |
| cellular_component | endomembrane system                                                                           | GO:0012505 | 15360 | 1463 | 1.052276242 | 0.000144828 | 0.225225225 | 0 | 1.063058943 | 6.15E-06    | 0.081081081 | 0          |
| biological_process | regulation of behavior                                                                        | GO:0050795 | 16414 | 123  | 1.187601455 | 0.00014885  | 0.01981982  | 0 | 1.145205728 | 0.00255753  | 0.176576577 | 0.0528506  |
| biological_process | mesenchyme development                                                                        | GO:0060485 | 16399 | 138  | 1.176880692 | 0.000150673 | 0.001801802 | 0 | 1.0923671   | 0.0295616   | 0.216216216 | 0.142716   |
| biological_process | olfactory bulb development                                                                    | GO:0021772 | 16508 | 29   | 1.386766951 | 0.000152665 | 0.048648649 | 0 | 1.332317457 | 0.000959774 | 0.057657658 | 0.0373906  |
| biological_process | regulation of protein kinase B signaling cascade                                              | GO:0051896 | 16456 | 81   | 1.230997719 | 0.000153233 | 0.007207207 | 0 | 1.083550796 | 0.0958441   | 0.194594595 | 0.255943   |
| biological_process | glomerulus development                                                                        | GO:0032835 | 16492 | 45   | 1.309822804 | 0.000156217 | 0.028828829 | 0 | 1.133487583 | 0.0602011   | 0.268468468 | 0.205178   |
| molecular_function | cation channel activity                                                                       | GO:0005261 | 16616 | 245  | 1.131969964 | 0.000156544 | 0.151315151 | 0 | 1.193274373 | 6.51E-08    | 0.063063063 | 0          |
| molecular_function | protein binding transcription factor activity                                                 | GO:0009088 | 16519 | 342  | 1.111278293 | 0.000158368 | 0.012612613 | 0 | 1.138156282 | 3.89E-06    | 0.005405405 | 0          |
| biological_process | negative regulation of MAPK cascade                                                           | GO:0043409 | 16444 | 93   | 1.214938155 | 0.000158899 | 0.014414414 | 0 | 1.042396534 | 0.238817    | 0.302702703 | 0.441337   |
| biological_process | muscle contraction                                                                            | GO:0006936 | 16368 | 169  | 1.159020084 | 0.00015965  | 0.009090909 | 0 | 1.093071692 | 0.0175822   | 0.113513514 | 0.114559   |
| biological_process | sensory organ development                                                                     | GO:0007423 | 16125 | 412  | 1.101027826 | 0.000161005 | 0.028828829 | 0 | 1.084188059 | 0.00136176  | 0.192792793 | 0.0437993  |
| cellular_component | presynaptic membrane                                                                          | GO:0042734 | 16772 | 51   | 1.290283948 | 0.000161479 | 0.156756757 | 0 | 1.292710455 | 0.000143804 | 0.138738739 | 0          |
| biological_process | establishment of organelle localization                                                       | GO:0051656 | 16402 | 135  | 1.177959945 | 0.000161521 | 0.018018018 | 0 | 1.124668359 | 0.00588143  | 0.124324324 | 0.0644291  |
| biological_process | neural tube formation                                                                         | GO:0001841 | 16443 | 94   | 1.213369499 | 0.000163233 | 0.03963964  | 0 | 1.174822427 | 0.00161916  | 0.113513514 | 0.0439221  |
| cellular_component | endosome                                                                                      | GO:0005768 | 16354 | 469  | 1.094449375 | 0.00016326  | 0.12972973  | 0 | 1.050114778 | 0.0282844   | 0.198189198 | 0.0149162  |
| biological_process | protein kinase B signaling cascade                                                            | GO:0043491 | 16434 | 103  | 1.203551686 | 0.000165728 | 0.007207207 | 0 | 1.07847422  | 0.0832197   | 0.189189189 | 0.243162   |
| biological_process | regulation of Wnt receptor signaling pathway                                                  | GO:0030111 | 16374 | 163  | 1.161166798 | 0.000170675 | 0.018018018 | 0 | 1.187482928 | 1.55E-05    | 0.072072072 | 0          |
| molecular_function | receptor signaling protein activity                                                           | GO:0005057 | 16786 | 75   | 1.238088801 | 0.000172203 | 0.009090909 | 0 | 1.144017335 | 0.0174642   | 0.12972973  | 0.0290886  |
| biological_process | response to other organism                                                                    | GO:0051707 | 16089 | 448  | 1.096007639 | 0.000179623 | 0.009090909 | 0 | 0.998045694 | 0.528998    | 0.526126126 | -1         |
| biological_process | cell chemotaxis                                                                               | GO:0060326 | 16413 | 124  | 1.184256027 | 0.000180334 | 0.007207207 | 0 | 1.210529915 | 2.29E-05    | 0.005405405 | 0.00337916 |
| biological_process | negative regulation of phosphorus metabolic process                                           | GO:0010563 | 16313 | 224  | 1.136671699 | 0.000180403 | 0.048648649 | 0 | 1.07506554  | 0.025045    | 0.144144144 | 0.135493   |
| biological_process | negative regulation of phosphate metabolic process                                            | GO:0045936 | 16313 | 224  | 1.136671699 | 0.000180403 | 0.048648649 | 0 | 1.07506554  | 0.025045    | 0.144144144 | 0.135493   |
| biological_process | negative regulation of cell projection organization                                           | GO:0031345 | 16468 | 69   | 1.247134587 | 0.000183234 | 0.048648649 | 0 | 1.279772748 | 2.75E-05    | 0.037837838 | 0.00329036 |
| biological_process | cochlea development                                                                           | GO:0090102 | 16507 | 30   | 1.375088201 | 0.000184247 | 0.003603604 | 0 | 1.231797526 | 0.0138669   | 0.055855856 | 0.0998146  |
| cellular_component | external side of plasma membrane                                                              | GO:0009897 | 16626 | 197  | 1.145596344 | 0.000185099 | 0.027027027 | 0 | 1.029759829 | 0.233392    | 0.345945946 | 0.39086    |
| molecular_function | solute:cation symporter activity                                                              | GO:0015294 | 16790 | 71   | 1.243349872 | 0.000186023 | 0.021621622 | 0 | 1.029673179 | 0.332155    | 0.38018018  | -1         |
| cellular_component | cell cortex                                                                                   | GO:0005938 | 16649 | 174  | 1.154864225 | 0.000187742 | 0.113513514 | 0 | 1.157207622 | 0.000152776 | 0.111717172 | 0          |
| molecular_function | transcription cofactor activity                                                               | GO:0003712 | 16555 | 306  | 1.115972505 | 0.000195434 | 0.010810811 | 0 | 1.151563248 | 1.79E-06    | 0.007207207 | 0          |
| cellular_component | apical part of cell                                                                           | GO:0045177 | 16533 | 270  | 1.123303293 | 0.000201731 | 0.046846847 | 0 | 1.023441489 | 0.250621    | 0.401801802 | 0.4158     |
| biological_process | osteoblast differentiation                                                                    | GO:0001649 | 16397 | 140  | 1.171859176 | 0.000202297 | 0.003603604 | 0 | 1.037026396 | 0.223041    | 0.347747748 | 0.421975   |
| cellular_component | site of polarized growth                                                                      | GO:0030427 | 16718 | 105  | 1.198424664 | 0.000205503 | 0.120720721 | 0 | 1.217501729 | 5.39E-05    | 0.068468468 | 0          |
| biological_process | positive regulation of ERK1 and ERK2 cascade                                                  | GO:0070374 | 16460 | 77   | 1.231334364 | 0.000212362 | 0.007207207 | 0 | 1.051532194 | 0.21622     | 0.327927928 | 0.415952   |
| biological_process | cellular response to insulin stimulus                                                         | GO:0032869 | 16412 | 125  | 1.181244692 | 0.00021324  | 0.077477477 | 0 | 1.180702908 | 0.00022192  | 0.095495495 | 0.0150248  |
| biological_process | gonad development                                                                             | GO:0008406 | 16358 | 179  | 1.15109583  | 0.000215369 | 0.007207207 | 0 | 1.051261091 | 0.116165    | 0.163963964 | 0.285815   |
| biological_process | response to biotic stimulus                                                                   | GO:0009607 | 16059 | 478  | 1.091614113 | 0.000215386 | 0.014414414 | 0 | 1.001948377 | 0.47022     | 0.47027027  | -1         |
| biological_process | platelet-derived growth factor receptor signaling pathway                                     | GO:0048008 | 16502 | 35   | 1.343065452 | 0.000216485 | 0.03963964  | 0 | 1.154909411 | 0.0560276   | 0.203603604 | 0.196292   |
| biological_process | gland development                                                                             | GO:0048732 | 16279 | 258  | 1.12547844  | 0.000216991 | 0.034234234 | 0 | 1.080967225 | 0.0115929   | 0.234234234 | 0.0903591  |
| biological_process | regulation of smooth muscle cell proliferation                                                | GO:0048660 | 16470 | 67   | 1.247605767 | 0.000217746 | 0.028828829 | 0 | 1.13083947  | 0.0315328   | 0.145945946 | 0.148354   |
| biological_process | cellular response to cytokine stimulus                                                        | GO:0071345 | 16289 | 248  | 1.127948567 | 0.000218713 | 0.003603604 | 0 | 1.060635138 | 0.0478166   | 0.18018018  | 0.181099   |
| cellular_component | synaptic vesicle membrane                                                                     | GO:0030672 | 16771 | 52   | 1.281048367 | 0.000219205 | 0.102702703 | 0 | 1.200739516 | 0.00601655  | 0.118918919 | 0          |
| biological_process | regulation of cell size                                                                       | GO:0008361 | 16461 | 76   | 1.232279353 | 0.000219496 | 0.036036036 | 0 | 1.195674538 | 0.00153097  | 0.081081081 | 0.0427463  |
| biological_process | negative regulation of cell adhesion                                                          | GO:0007162 | 16458 | 79   | 1.227775628 | 0.000219878 | 0.003603604 | 0 | 1.173491567 | 0.03963964  | 0.03071112  | 0.0586532  |
| molecular_function | identical protein binding                                                                     | GO:0042802 | 16062 | 799  | 1.07003708  | 0.000221304 | 0.001801802 | 0 | 1.036415088 | 0.0338726   | 0.136936937 | 0.050867   |
| biological_process | renal system process                                                                          | GO:0003014 | 16476 | 61   | 1.258996377 | 0.000223924 | 0.023423423 | 0 | 1.07173304  | 0.165488    | 0.293693694 | 0.35527    |
| biological_process | actin filament bundle assembly                                                                | GO:0051017 | 16465 | 72   | 1.238312174 | 0.000223933 | 0.016216216 |   |             |             |             |            |

|                    |                                                               |            |       |      |             |             |             |   |             |             |             |            |
|--------------------|---------------------------------------------------------------|------------|-------|------|-------------|-------------|-------------|---|-------------|-------------|-------------|------------|
| cellular_component | neuron projection membrane                                    | GO:0032589 | 16793 | 30   | 1.368268289 | 0.000235352 | 0.09009009  | 0 | 1.250662425 | 0.00865253  | 0.16036036  | 0          |
| biological_process | respiratory system development                                | GO:0060541 | 16360 | 177  | 1.150909141 | 0.000235978 | 0.014414414 | 0 | 1.101503841 | 0.00934537  | 0.171171171 | 0.0774356  |
| biological_process | peptidyl-tyrosine phosphorylation                             | GO:0018108 | 16354 | 183  | 1.148119717 | 0.000241533 | 0.012612613 | 0 | 1.111958466 | 0.00417096  | 0.154954955 | 0.058354   |
| biological_process | formation of primary germ layer                               | GO:0001704 | 16467 | 70   | 1.240160977 | 0.00024361  | 0.012612613 | 0 | 1.122626942 | 0.0374731   | 0.223423423 | 0.161131   |
| biological_process | regulation of developmental growth                            | GO:0048638 | 16433 | 104  | 1.196793177 | 0.000244136 | 0.034234234 | 0 | 1.128203827 | 0.011553    | 0.189189189 | 0.0894536  |
| biological_process | regulation of programmed cell death                           | GO:0043067 | 15566 | 971  | 1.062605157 | 0.000248245 | 0.012612613 | 0 | 1.033260912 | 0.032146    | 0.163963964 | 0.149816   |
| biological_process | Notch signaling pathway                                       | GO:0007219 | 16447 | 90   | 1.211125873 | 0.000251965 | 0.005405405 | 0 | 1.14114405  | 0.0100208   | 0.104504505 | 0.0808446  |
| biological_process | phosphatidylinositol 3-kinase cascade                         | GO:0014065 | 16474 | 63   | 1.252546155 | 0.000252018 | 0.027027027 | 0 | 1.085277145 | 0.120082    | 0.30990991  | 0.294668   |
| biological_process | regulation of polysaccharide biosynthetic process             | GO:0032885 | 16509 | 28   | 1.37893707  | 0.003603604 | 0.003603604 | 0 | 1.203401357 | 0.0310358   | 0.138738739 | 0.146791   |
| biological_process | glycoprotein metabolic process                                | GO:0009100 | 16285 | 252  | 1.125430115 | 0.000255109 | 0.064864865 | 0 | 1.132383821 | 0.000122249 | 0.037837838 | 0.00834175 |
| molecular_function | solute:sodium symporter activity                              | GO:0015370 | 16814 | 47   | 1.291702929 | 0.000261495 | 0.028828829 | 0 | 1.013668546 | 0.435451    | 0.457657658 | -1         |
| molecular_function | core promoter binding                                         | GO:0001047 | 16809 | 52   | 1.277064402 | 0.000264171 | 0.003603604 | 0 | 1.256499258 | 0.000666689 | 0.003603604 | 0          |
| biological_process | vascular endothelial growth factor receptor signaling pathway | GO:0048010 | 16494 | 43   | 1.304650141 | 0.000265404 | 0.005405405 | 0 | 1.228695147 | 0.00464928  | 0.073873874 | 0.0592134  |
| biological_process | ear development                                               | GO:0043583 | 16358 | 179  | 1.148629857 | 0.00026707  | 0.003603604 | 0 | 1.13634053  | 0.000744779 | 0.102702703 | 0.0329362  |
| molecular_function | organic acid:sodium symporter activity                        | GO:0005343 | 16838 | 23   | 1.416435081 | 0.000268482 | 0.016216216 | 0 | 0.993482249 | 0.521614    | 0.497297297 | -1         |
| biological_process | positive regulation of neurogenesis                           | GO:0050769 | 16413 | 124  | 1.178794491 | 0.000268677 | 0.03963964  | 0 | 1.134907149 | 0.00450357  | 0.172972973 | 0.0571333  |
| biological_process | cardiac ventricle morphogenesis                               | GO:0003208 | 16478 | 59   | 1.259652728 | 0.000269417 | 0.009090909 | 0 | 1.053693913 | 0.237122    | 0.306306306 | 0.437167   |
| biological_process | visual behavior                                               | GO:0007632 | 16499 | 38   | 1.323250369 | 0.000274756 | 0.120720721 | 0 | 1.223428893 | 0.00846268  | 0.145945946 | 0.0771186  |
| biological_process | smooth muscle cell proliferation                              | GO:0048659 | 16467 | 70   | 1.237828678 | 0.000276358 | 0.028828829 | 0 | 1.125216657 | 0.0345013   | 0.16036036  | 0.153229   |
| biological_process | multicellular organismal macromolecule metabolic process      | GO:0044259 | 16489 | 48   | 1.287357633 | 0.00027684  | 0.012612613 | 0 | 1.041677676 | 0.30825     | 0.306306306 | -1         |
| biological_process | organ growth                                                  | GO:0035265 | 16455 | 82   | 1.21962832  | 0.000276848 | 0.000270727 | 0 | 1.087966581 | 0.0833157   | 0.27027027  | 0.243526   |
| biological_process | regulation of insulin receptor signaling pathway              | GO:0046626 | 16508 | 29   | 1.369740277 | 0.000278453 | 0.001801802 | 0 | 1.2775135   | 0.00478813  | 0.037837838 | 0.0601278  |
| biological_process | positive regulation of smooth muscle cell proliferation       | GO:0048661 | 16496 | 41   | 1.310797814 | 0.000279014 | 0.01981982  | 0 | 1.203921647 | 0.0117742   | 0.100909091 | 0.0901176  |
| biological_process | regulation of apoptotic process                               | GO:0042981 | 15577 | 960  | 1.06240904  | 0.000279508 | 0.012612613 | 0 | 1.030740706 | 0.0445967   | 0.176576577 | 0.177234   |
| biological_process | peptidyl-tyrosine modification                                | GO:0018212 | 16352 | 185  | 1.145650349 | 0.000279548 | 0.012612613 | 0 | 1.108894984 | 0.00494108  | 0.151351351 | 0.0610318  |
| biological_process | adherens junction organization                                | GO:0034332 | 16492 | 45   | 1.296383005 | 0.000281966 | 0.063063063 | 0 | 1.331529115 | 5.73E-05    | 0.09009009  | 0.03039761 |
| biological_process | regulation of growth                                          | GO:0040008 | 16086 | 451  | 1.092422905 | 0.000283532 | 0.306303631 | 0 | 1.071260794 | 0.00393426  | 0.142342342 | 0.0590513  |
| molecular_function | motor activity                                                | GO:0003774 | 16734 | 127  | 1.175396765 | 0.000294494 | 0.052252525 | 0 | 0.99708022  | 0.522805    | 0.508108108 | -1         |
| molecular_function | cytokine binding                                              | GO:0019955 | 16814 | 47   | 1.288762916 | 0.000297662 | 0.005405405 | 0 | 1.210924494 | 0.00606847  | 0.068468468 | 0          |
| biological_process | regulation of protein transport                               | GO:0051223 | 16273 | 264  | 1.121017027 | 0.000298263 | 0.01981982  | 0 | 1.040540942 | 0.125063    | 0.225225225 | 0.300866   |
| biological_process | cardiac ventricle development                                 | GO:0003231 | 16450 | 87   | 1.211900546 | 0.000299103 | 0.014414414 | 0 | 1.095714935 | 0.0605249   | 0.248648649 | 0.205173   |
| biological_process | branching involved in salivary gland morphogenesis            | GO:0060445 | 16515 | 22   | 1.421942067 | 0.000301569 | 0.003603604 | 0 | 1.228645546 | 0.0315304   | 0.106306306 | 0.148475   |
| biological_process | protein localization to membrane                              | GO:0072657 | 16439 | 98   | 1.19395911  | 0.000302777 | 0.01981982  | 0 | 1.132649409 | 0.0112675   | 0.140504541 | 0.0881519  |
| biological_process | neural precursor cell proliferation                           | GO:0061351 | 16443 | 94   | 1.203319111 | 0.000308443 | 0.041441441 | 0 | 1.152448349 | 0.00512392  | 0.198198198 | 0.060502   |
| biological_process | vascular process in circulatory system                        | GO:0003018 | 16416 | 121  | 1.178966655 | 0.000310385 | 0.034234234 | 0 | 1.105266872 | 0.0220633   | 0.174774775 | 0.127568   |
| biological_process | visual learning                                               | GO:0008542 | 16501 | 36   | 1.328869911 | 0.000311403 | 0.122522523 | 0 | 1.24102815  | 0.00607798  | 0.131531532 | 0.0648557  |
| biological_process | organelle organization                                        | GO:0069996 | 14538 | 1999 | 1.041423906 | 0.000311591 | 0.14954955  | 0 | 1.055592363 | 2.20E-06    | 0.007207207 | 0          |
| biological_process | stem cell maintenance                                         | GO:0019827 | 16445 | 92   | 1.205236211 | 0.000314039 | 0.021621622 | 0 | 1.195904575 | 0.000549791 | 0.059459459 | 0.0299551  |
| biological_process | glial cell development                                        | GO:0021782 | 16475 | 62   | 1.250188468 | 0.000314763 | 0.005405405 | 0 | 1.116131169 | 0.0562813   | 0.057657658 | 0.197104   |
| biological_process | regulation of macromolecule metabolic process                 | GO:0060255 | 12867 | 3670 | 1.028683785 | 0.000322879 | 0.266666667 | 0 | 1.054211735 | 5.65E-11    | 0.124324324 | 0          |
| biological_process | cerebellar cortex morphogenesis                               | GO:0021696 | 16514 | 23   | 1.410069502 | 0.000326358 | 0.009090909 | 0 | 1.437258622 | 0.000139141 | 0.014414414 | 0.0107647  |
| biological_process | organic substance transport                                   | GO:0071702 | 14865 | 1672 | 1.045413743 | 0.000344666 | 0.147747748 | 0 | 1.027186848 | 0.0211541   | 0.194594595 | 0.126588   |
| biological_process | pathway-restricted SMAAD protein phosphorylation              | GO:0060389 | 16504 | 33   | 1.340066079 | 0.000353261 | 0.023423423 | 0 | 1.087464253 | 0.19185     | 0.34954955  | 0.387772   |
| biological_process | anokis                                                        | GO:0043276 | 16516 | 21   | 1.426278415 | 0.000355021 | 0.012612613 | 0 | 1.29881397  | 0.00881534  | 0.027027027 | 0.0773912  |
| molecular_function | transcription factor binding transcription factor activity    | GO:0000989 | 16533 | 328  | 1.106873284 | 0.000355082 | 0.009090909 | 0 | 1.138022865 | 6.14E-06    | 0.005405405 | 0          |
| biological_process | negative regulation of Wnt receptor signaling pathway         | GO:0030178 | 16434 | 103  | 1.191916191 | 0.000356852 | 0.025225225 | 0 | 1.201238676 | 0.000193696 | 0.086486486 | 0.0128725  |
| biological_process | cell death                                                    | GO:0008219 | 15211 | 1326 | 1.051450975 | 0.000357967 | 0.018018018 | 0 | 1.045632279 | 0.00134776  | 0.093693694 | 0.0439564  |
| biological_process | multi-organism behavior                                       | GO:0051705 | 16483 | 54   | 1.265171281 | 0.000361589 | 0.075675676 | 0 | 1.219606034 | 0.00255733  | 0.138738739 | 0.0529353  |
| biological_process | regulation of establishment of protein localization           | GO:0070201 | 16246 | 291  | 1.113386634 | 0.000362322 | 0.025225225 | 0 | 1.048402266 | 0.0745375   | 0.194594595 | 0.227898   |
| molecular_function | regulation of stem cell proliferation                         | GO:0072091 | 16466 | 71   | 1.230667049 | 0.000370752 | 0.003603604 | 0 | 1.19360844  | 0.0023149   | 0.086486486 | 0.0508929  |
| molecular_function | voltage-gated ion channel activity                            | GO:0052344 | 16695 | 166  | 1.150273753 | 0.0003755   | 0.171171171 | 0 | 1.242296511 | 2.76E-08    | 0.025325225 | 0          |
| molecular_function | voltage-gated channel activity                                | GO:0022832 | 16695 | 166  | 1.150273753 | 0.0003755   | 0.171171171 | 0 | 1.242296511 | 2.76E-08    | 0.025325225 | 0          |
| biological_process | regulation of cell activation                                 | GO:0050865 | 16258 | 279  | 1.115314973 | 0.000383203 | 0.01981982  | 0 | 1.073646922 | 0.0158233   | 0.106306306 | 0.10859    |
| biological_process | regulation of intracellular protein transport                 | GO:0033157 | 16384 | 153  | 1.156310913 | 0.000383538 | 0.007207207 | 0 | 1.069451841 | 0.0674882   | 0.232432432 | 0.218449   |
| biological_process | regulation of cellular response to insulin stimulus           | GO:1900076 | 16502 | 35   | 1.327945245 | 0.000384053 | 0.005405405 | 0 | 1.209623412 | 0.0157664   | 0.104504505 | 0.108894   |
| biological_process | cytokine-mediated signaling pathway                           | GO:0019221 | 16389 | 148  | 1.158866475 | 0.000386085 | 0.005405405 | 0 | 1.100793637 | 0.0164449   | 0.104504505 | 0.111961   |
| biological_process | heart valve development                                       | GO:0003170 | 16511 | 26   | 1.380033782 | 0.000391055 | 0.007207207 | 0 | 1.101950682 | 0.183771    | 0.268468468 | 0.378485   |
| biological_process | adherens junction assembly                                    | GO:0034333 | 16498 | 39   | 1.310155631 | 0.000391342 | 0.073873874 | 0 | 1.310738595 | 0.000382496 | 0.10990991  | 0.0161714  |
| biological_process | telencephalon development                                     | GO:0021537 | 16371 | 166  | 1.149754584 | 0.000391451 | 0.077477477 | 0 | 1.114239325 | 0.00519933  | 0.201801802 | 0.062956   |
| biological_process | regulation of systemic arterial blood pressure by hormone     | GO:0001990 | 16508 | 29   | 1.35928157  | 0.000398064 | 0.010810811 | 0 | 0.983118423 | 0.562635    | 0.58018018  | -1         |
| biological_process | positive regulation of axonogenesis                           | GO:0050772 | 16494 | 43   | 1.294668867 | 0.000402324 | 0.03963964  | 0 | 1.162682053 | 0.0321484   | 0.205405405 | 0.149695   |
| biological_process | regulation of dephosphorylation                               | GO:0035303 | 16429 | 108  | 1.185444417 | 0.000405499 | 0.16036036  | 0 | 1.226517189 | 2.15E-05    | 0.160364865 | 0          |
| cellular_component | ruffle                                                        | GO:0001726 | 16711 | 112  | 1.182070467 | 0.000406003 | 0.005405405 | 0 | 1.207480609 | 6.78E-05    | 0.014414414 | 0          |
| molecular_function | DNA binding                                                   | GO:0003677 | 15171 | 1690 | 1.044602901 | 0.00040654  | 0.142342342 | 0 | 1.069742599 | 8.23E-08    | 0.068468468 | 0          |
| biological_process | mesenchymal cell development                                  | GO:0014031 | 16429 | 108  | 1.185377231 | 0.000407308 | 0.003603604 | 0 | 1.101300101 | 0.0336725   | 0.162162162 | 0.153231   |
| biological_process | regulation of striated muscle tissue development              | GO:0016202 | 16431 | 106  | 1.186841792 | 0.00041484  | 0.018018018 | 0 | 1.150013964 | 0.003639941 | 0.05045045  | 0.058721   |
| biological_process | regulation of muscle tissue development                       | GO:1901861 | 16431 | 106  | 1.186841792 | 0.00041484  | 0.018018018 | 0 | 1.150013964 | 0.003639941 | 0.05045045  | 0.058721   |
| biological_process | negative regulation of myeloid cell differentiation           | GO:0045638 | 16474 | 63   | 1.242623807 | 0.000415992 | 0.037837838 | 0 | 0.926813283 | 0.843311    | 0.735135135 | -1         |
| biological_process | regulation of myeloid cell differentiation                    | GO:0045637 | 16410 | 127  | 1.17052693  | 0.000416637 | 0.012612613 | 0 | 1.077169685 | 0.0652501   | 0.135135135 | 0.217429   |
| biological_process | mammary gland duct morphogenesis                              | GO:0060603 | 16502 | 35   | 1.325702783 | 0.000417332 | 0.003603604 | 0 | 1.294387786 | 0.00126469  | 0.063063063 | 0.0443424  |
| biological_process | negative regulation of programmed cell death                  | GO:0043069 | 16021 | 516  | 1.083582774 | 0.00041737  | 0.010810811 | 0 | 1.066534829 | 0.00391198  | 0.084684685 | 0.0593019  |
| biological_process | regulation of muscle organ development                        | GO:0048634 | 16430 | 107  | 1.18586532  | 0.00041751  | 0.018018018 | 0 | 1.150749249 | 0.052252252 | 0.03368225  | 0.0576637  |
| biological_process | regulation of excitatory postsynaptic membrane potential      | GO:0060079 | 16499 | 38   | 1.311958952 | 0.000426987 | 0.091891892 | 0 | 1.279157193 | 0.00142234  | 0.111717172 | 0.0434961  |
| biological_process | neural crest cell development                                 | GO:0014032 | 16491 | 46   | 1.283015182 | 0.000435253 | 0.014414414 | 0 | 1.174534747 | 0.0200277   | 0.052252252 | 0.124942   |
| biological_process | memory                                                        | GO:0007613 | 164   |      |             |             |             |   |             |             |             |            |

|                    |                                                                                        |            |       |       |             |             |             |   |             |             |             |            |
|--------------------|----------------------------------------------------------------------------------------|------------|-------|-------|-------------|-------------|-------------|---|-------------|-------------|-------------|------------|
| biological_process | positive regulation of stem cell proliferation                                         | GO:200648  | 16484 | 53    | 1.262384475 | 0.000460039 | 0.003603604 | 0 | 1.223995913 | 0.00233441  | 0.048648649 | 0.0506483  |
| biological_process | vasculogenesis                                                                         | GO:0001570 | 16464 | 73    | 1.223394932 | 0.000461023 | 0.016216216 | 0 | 1.11613475  | 0.042496    | 0.181981982 | 0.172603   |
| biological_process | respiratory tube development                                                           | GO:0030323 | 16378 | 159   | 1.150926673 | 0.000462648 | 0.014414414 | 0 | 1.088740733 | 0.0257364   | 0.198198198 | 0.136934   |
| biological_process | response to transforming growth factor beta stimulus                                   | GO:0071559 | 16395 | 142   | 1.159782687 | 0.000462984 | 0.084684685 | 0 | 1.214628814 | 4.31E-06    | 0.077477477 | 0          |
| biological_process | positive regulation of epithelial cell migration                                       | GO:0010634 | 16481 | 56    | 1.255003466 | 0.000465004 | 0.012612613 | 0 | 1.190007916 | 0.00681301  | 0.151351351 | 0.0705504  |
| cellular_component | apical plasma membrane                                                                 | GO:0016324 | 16624 | 199   | 1.134656294 | 0.000466615 | 0.032432432 | 0 | 1.01848455  | 0.324774    | 0.414414414 | -1         |
| biological_process | anatomical structure maturation                                                        | GO:0071695 | 16496 | 41    | 1.297683848 | 0.00047385  | 0.009090909 | 0 | 1.21010108  | 0.00982309  | 0.077477477 | 0.0808826  |
| molecular_function | small GTPase binding                                                                   | GO:0031267 | 16738 | 123   | 1.171442188 | 0.000474247 | 0.154954955 | 0 | 1.223659503 | 8.08E-06    | 0.052525252 | 0          |
| biological_process | death                                                                                  | GO:0016265 | 15206 | 1331  | 1.050154219 | 0.000474692 | 0.018018018 | 0 | 1.04586565  | 0.00125484  | 0.095495495 | 0.0428089  |
| biological_process | negative regulation of locomotion                                                      | GO:0040013 | 16402 | 135   | 1.163555361 | 0.000474972 | 0.043243243 | 0 | 1.116803169 | 0.00913263  | 0.171171171 | 0.0777382  |
| biological_process | embryonic heart tube development                                                       | GO:0035050 | 16483 | 54    | 1.258961096 | 0.000480909 | 0.014414414 | 0 | 1.291131782 | 0.000102972 | 0.016216216 | 0.00853014 |
| biological_process | regulation of tube size                                                                | GO:0035150 | 16432 | 105   | 1.185406665 | 0.000481538 | 0.046846847 | 0 | 1.08273254  | 0.070374    | 0.214414414 | 0.220552   |
| biological_process | regulation of blood vessel size                                                        | GO:0050880 | 16432 | 105   | 1.185406665 | 0.000481538 | 0.046846847 | 0 | 1.08273254  | 0.070374    | 0.214414414 | 0.220552   |
| biological_process | cation transport                                                                       | GO:0006812 | 15874 | 663   | 1.072515016 | 0.000482028 | 1.190990991 | 0 | 1.051077046 | 0.0100381   | 0.25045045  | 0.0806656  |
| biological_process | mesoderm morphogenesis                                                                 | GO:0048332 | 16482 | 55    | 1.256532928 | 0.000482133 | 0.003603604 | 0 | 1.110358893 | 0.077814    | 0.232432432 | 0.233894   |
| cellular_component | cortical cytoskeleton                                                                  | GO:0030863 | 16766 | 57    | 1.250970464 | 0.000505381 | 0.027027027 | 0 | 1.232064714 | 0.00118343  | 0.052525252 | 0          |
| biological_process | sprouting angiogenesis                                                                 | GO:0002040 | 16492 | 45    | 1.281986483 | 0.000517404 | 0.030630631 | 0 | 1.143369236 | 0.0476517   | 0.192792793 | 0.180702   |
| molecular_function | RNA polymerase II regulatory region sequence-specific DNA binding                      | GO:0000977 | 16781 | 80    | 1.211255372 | 0.000517897 | 0.007207207 | 0 | 1.317430567 | 4.12E-07    | 0.001801802 | 0          |
| biological_process | negative regulation of protein serine/threonine kinase activity                        | GO:0071901 | 16460 | 77    | 1.215063243 | 0.000525808 | 0.014414414 | 0 | 1.038675496 | 0.277883    | 0.362162162 | 0.496237   |
| biological_process | dicarboxylic acid transport                                                            | GO:0006835 | 16484 | 53    | 1.259183146 | 0.000531203 | 0.037837838 | 0 | 0.883073818 | 0.930142    | 0.792792793 | -1         |
| biological_process | skeletal system morphogenesis                                                          | GO:0048705 | 16375 | 162   | 1.147604016 | 0.000537588 | 0.025225225 | 0 | 1.06050167  | 0.0900814   | 0.279279279 | 0.251015   |
| biological_process | positive regulation of hydrolase activity                                              | GO:0051345 | 16224 | 313   | 1.105557065 | 0.0005462   | 0.037837838 | 0 | 1.090009511 | 0.00267931  | 0.086486486 | 0.0523776  |
| biological_process | inner ear development                                                                  | GO:0048839 | 16381 | 156   | 1.150229708 | 0.000546396 | 0.003603604 | 0 | 1.153121271 | 0.000436945 | 0.066666667 | 0.0201929  |
| biological_process | integrin-mediated signaling pathway                                                    | GO:0007229 | 16472 | 65    | 1.232693368 | 0.000565329 | 0.014414414 | 0 | 1.150873139 | 0.0173871   | 0.007207207 | 0.114827   |
| biological_process | positive regulation of stress-activated protein kinase signaling cascade               | GO:0070304 | 16483 | 54    | 1.255348752 | 0.000566145 | 0.021621622 | 0 | 1.03514361  | 0.32709     | 0.408009009 | -1         |
| biological_process | regulation of transmembrane receptor protein serine/threonine kinase signaling pathway | GO:0090092 | 16404 | 133   | 1.162166725 | 0.000572184 | 0.045045045 | 0 | 1.182270867 | 0.000128267 | 0.052525252 | 0.00813849 |
| biological_process | smooth muscle contraction                                                              | GO:0006939 | 16471 | 66    | 1.230673939 | 0.000572185 | 0.072072072 | 0 | 1.034572116 | 0.312987    | 0.387387387 | -1         |
| biological_process | negative regulation of cellular component movement                                     | GO:0051271 | 16415 | 122   | 1.169352557 | 0.000573068 | 0.032432432 | 0 | 1.118064643 | 0.0116948   | 0.153153153 | 0.0901924  |
| biological_process | hormone biosynthetic process                                                           | GO:0042446 | 16497 | 40    | 1.296270469 | 0.000578148 | 0.010810811 | 0 | 0.986050552 | 0.560821    | 0.547747748 | -1         |
| biological_process | social behavior                                                                        | GO:0035176 | 16505 | 32    | 1.331279353 | 0.00057897  | 0.05045045  | 0 | 1.20873919  | 0.020319    | 0.174774775 | 0.126437   |
| biological_process | intraspecies interaction between organisms                                             | GO:0051703 | 16505 | 32    | 1.331279353 | 0.00057897  | 0.05045045  | 0 | 1.20873919  | 0.020319    | 0.174774775 | 0.126437   |
| biological_process | negative regulation of protein metabolic process                                       | GO:0051248 | 16159 | 378   | 1.095313388 | 0.000583261 | 0.046846847 | 0 | 1.074591442 | 0.00552613  | 0.095495495 | 0.0636958  |
| biological_process | embryonic skeletal system morphogenesis                                                | GO:0048704 | 16473 | 64    | 1.23740406  | 0.000587014 | 0.005405405 | 0 | 1.031536855 | 0.33077     | 0.376576577 | -1         |
| molecular_function | hormone receptor binding                                                               | GO:0051427 | 16756 | 105   | 1.182123422 | 0.000592149 | 0.05045045  | 0 | 1.252306634 | 3.53E-06    | 0.012612613 | 0          |
| biological_process | digestive tract morphogenesis                                                          | GO:0048546 | 16489 | 48    | 1.269822202 | 0.000592205 | 0.016216216 | 0 | 1.214754397 | 0.000492836 | 0.05045045  | 0.0611116  |
| biological_process | regulation of polysaccharide metabolic process                                         | GO:0032881 | 16507 | 30    | 1.341424204 | 0.000593443 | 0.003603604 | 0 | 1.172979256 | 0.0502422   | 0.151351351 | 0.18368    |
| biological_process | regulation of extent of cell growth                                                    | GO:0061387 | 16489 | 48    | 1.269756696 | 0.000593843 | 0.048648649 | 0 | 1.14102882  | 0.044632    | 0.237837838 | 0.177116   |
| biological_process | nitrogen compound transport                                                            | GO:0071705 | 16095 | 442   | 1.087787722 | 0.000597033 | 0.131531532 | 0 | 1.046618174 | 0.0426574   | 0.291891892 | 0.172898   |
| biological_process | dendritic spine development                                                            | GO:0060996 | 16507 | 30    | 1.340984811 | 0.00060219  | 0.046846847 | 0 | 1.331850262 | 0.000813279 | 0.09009009  | 0.0345821  |
| biological_process | divalent inorganic cation homeostasis                                                  | GO:0072507 | 16302 | 235   | 1.120883286 | 0.000613067 | 0.066666667 | 0 | 1.077455112 | 0.0191654   | 0.196396396 | 0.119918   |
| biological_process | regulation of postsynaptic membrane potential                                          | GO:0060078 | 16493 | 44    | 1.280410798 | 0.000627662 | 0.095495495 | 0 | 1.276219336 | 0.000742035 | 0.104504505 | 0.0330036  |
| biological_process | negative regulation of gliogenesis                                                     | GO:0014014 | 16507 | 30    | 1.339727097 | 0.000627891 | 0.014414414 | 0 | 1.024327173 | 0.408676    | 0.418018018 | -1         |
| biological_process | regionalization                                                                        | GO:0003002 | 16275 | 262   | 1.114139168 | 0.000628519 | 0.034234234 | 0 | 1.102871996 | 0.00182385  | 0.126126126 | 0.0481446  |
| biological_process | cartilage development                                                                  | GO:0051216 | 16398 | 139   | 1.157286256 | 0.00062881  | 0.030630631 | 0 | 1.178375754 | 0.000127114 | 0.084684685 | 0.00818281 |
| biological_process | protein import into nucleus                                                            | GO:0006606 | 16346 | 191   | 1.133886124 | 0.000632943 | 0.023423423 | 0 | 1.100391836 | 0.00782109  | 0.140540541 | 0.0766644  |
| biological_process | protein targeting to nucleus                                                           | GO:0044744 | 16346 | 191   | 1.133886124 | 0.000632943 | 0.023423423 | 0 | 1.100391836 | 0.00782109  | 0.140540541 | 0.0766644  |
| biological_process | cellular macromolecule localization                                                    | GO:0070727 | 15664 | 873   | 1.061275574 | 0.000636573 | 0.133333333 | 0 | 1.052364137 | 0.00294945  | 0.120720721 | 0.0576111  |
| biological_process | collagen metabolic process                                                             | GO:0032963 | 16491 | 46    | 1.297774246 | 0.000639537 | 0.016216216 | 0 | 1.020226447 | 0.397792    | 0.4         | -1         |
| molecular_function | PDZ domain binding                                                                     | GO:0030165 | 16775 | 86    | 1.199694313 | 0.000650296 | 0.099090909 | 0 | 1.154497019 | 0.00642331  | 0.156756757 | 0          |
| cellular_component | neuromuscular junction                                                                 | GO:0031594 | 16778 | 45    | 1.276299095 | 0.000652035 | 0.046846847 | 0 | 1.34748844  | 2.64E-05    | 0.007207207 | 0          |
| biological_process | mesenchymal cell differentiation                                                       | GO:0048762 | 16417 | 120   | 1.168796955 | 0.000653556 | 0.007207207 | 0 | 1.087529301 | 0.0477865   | 0.214414414 | 0.181219   |
| biological_process | endothelium development                                                                | GO:0003158 | 16490 | 47    | 1.270043807 | 0.000660931 | 0.046846847 | 0 | 1.151796077 | 0.0355343   | 0.192792793 | 0.157383   |
| biological_process | collagen fibril organization                                                           | GO:0030199 | 16503 | 34    | 1.31760803  | 0.00066132  | 0.021621622 | 0 | 1.089597628 | 0.182522    | 0.275675676 | 0.3771     |
| biological_process | regulation of immune effector process                                                  | GO:0002697 | 16369 | 168   | 1.142272095 | 0.000662711 | 0.046846847 | 0 | 0.975203203 | 0.712113    | 0.740540541 | -1         |
| biological_process | salivary gland development                                                             | GO:0007431 | 16500 | 37    | 1.304315767 | 0.000664154 | 0.003603604 | 0 | 1.16031278  | 0.0454293   | 0.097297297 | 0.178068   |
| biological_process | positive regulation of protein transport                                               | GO:0051222 | 16381 | 156   | 1.147617224 | 0.000666662 | 0.028828829 | 0 | 1.018613196 | 0.342926    | 0.405405405 | -1         |
| cellular_component | voltage-gated potassium channel complex                                                | GO:0008076 | 16773 | 50    | 1.261251272 | 0.000676488 | 0.106306306 | 0 | 1.288020188 | 0.000205554 | 0.09090909  | 0          |
| cellular_component | potassium channel complex                                                              | GO:0034705 | 16773 | 50    | 1.261251272 | 0.000676488 | 0.106306306 | 0 | 1.288020188 | 0.000205554 | 0.09090909  | 0          |
| biological_process | regulation of chemotaxis                                                               | GO:0050920 | 16450 | 87    | 1.197213319 | 0.000700306 | 0.009090909 | 0 | 1.224199673 | 0.000140799 | 0.03963964  | 0.0107359  |
| biological_process | cellular response to transforming growth factor beta stimulus                          | GO:0071560 | 16397 | 140   | 1.154764291 | 0.000722937 | 0.084684685 | 0 | 1.215058532 | 4.79E-06    | 0.075675676 | 0          |
| cellular_component | ion channel complex                                                                    | GO:0034702 | 16661 | 162   | 1.143773766 | 0.000723942 | 0.171171711 | 0 | 1.156153207 | 0.000270853 | 0.154954955 | 0          |
| biological_process | cellular protein localization                                                          | GO:0034613 | 15667 | 870   | 1.06057457  | 0.000738212 | 0.133333333 | 0 | 1.051553171 | 0.00340732  | 0.126126126 | 0.0573259  |
| biological_process | regulation of epithelial cell proliferation                                            | GO:0050678 | 16343 | 194   | 1.130988558 | 0.000739469 | 0.036036036 | 0 | 1.13789551  | 0.000409448 | 0.081081081 | 0.0182322  |
| biological_process | negative regulation of kinase activity                                                 | GO:0033673 | 16395 | 142   | 1.153318679 | 0.000741059 | 0.036036036 | 0 | 1.02849264  | 0.277395    | 0.354954955 | 0.495705   |
| biological_process | negative regulation of neuron differentiation                                          | GO:0045665 | 16481 | 56    | 1.244488686 | 0.00075088  | 0.032432432 | 0 | 1.128845541 | 0.0471782   | 0.127927928 | 0.180912   |
| biological_process | G-protein coupled receptor signaling pathway                                           | GO:0007186 | 15891 | 646   | 1.070666589 | 0.000753075 | 0.162162162 | 0 | 1.041857712 | 0.0300757   | 0.245045045 | 0.144217   |
| biological_process | epithelial cell differentiation                                                        | GO:0030855 | 16115 | 422   | 1.08804499  | 0.000753104 | 0.016216216 | 0 | 1.090042407 | 0.000586283 | 0.059495495 | 0.029898   |
| biological_process | positive regulation of stress-activated MAPK cascade                                   | GO:0032874 | 16484 | 53    | 1.251267673 | 0.000753108 | 0.018018018 | 0 | 1.032518589 | 0.340662    | 0.423423423 | -1         |
| biological_process | cellular process                                                                       | GO:0009987 | 4973  | 11564 | 1.009338824 | 0.000759464 | 0.181981982 | 0 | 1.010014398 | 0.000336543 | 0.14954955  | 0.0141176  |
| biological_process | negative regulation of protein phosphorylation                                         | GO:0001933 | 16352 | 185   | 1.133818427 | 0.000761194 | 0.05045045  | 0 | 1.048040262 | 0.127543    | 0.252252252 | 0.305574   |
| biological_process | regulation of immune response                                                          | GO:0050776 | 16216 | 321   | 1.101143701 | 0.000763294 | 0.032432432 | 0 | 0.971574779 | 0.813504    | 0.765765766 | -1         |
| biological_process | negative regulation of cell migration                                                  | GO:0030336 | 16421 | 116   | 1.169139948 | 0.000771424 | 0.034234234 | 0 | 1.115167935 | 0.0155426   | 0.174774775 | 0.105807   |
| molecular_function | small molecule binding                                                                 | GO:0036094 | 14361 | 2500  | 1.033728571 | 0.000775018 | 0.216216216 | 0 | 1.043900561 | 1.90E-05    | 0.145945946 | 0          |
| molecular_function | calcium ion transmembrane transporter activity                                         | GO:0015085 | 16762 | 99    | 1.183007434 | 0.000780055 | 1.78378378  | 0 | 1.296910144 | 1.43E-07    | 0.036036036 | 0          |
| molecular_function | nucleotide binding                                                                     | GO:0000166 | 14488 | 2373  | 1.034735767 | 0.000783901 | 0.214414414 | 0 | 1.0439      |             |             |            |

|                    |                                                                                                           |            |       |      |             |             |             |            |             |             |             |            |
|--------------------|-----------------------------------------------------------------------------------------------------------|------------|-------|------|-------------|-------------|-------------|------------|-------------|-------------|-------------|------------|
| biological_process | cellular carbohydrate metabolic process                                                                   | GO:0044262 | 16297 | 240  | 1.116669358 | 0.0008066   | 0.036036036 | 0          | 1.105004265 | 0.00226884  | 0.05045045  | 0.0495655  |
| biological_process | cardiac septum morphogenesis                                                                              | GO:0060411 | 16498 | 39   | 1.291175194 | 0.000807196 | 0.028828829 | 0          | 1.27110635  | 0.00166262  | 0.048648649 | 0.043855   |
| biological_process | muscle tissue morphogenesis                                                                               | GO:0060415 | 16481 | 56   | 1.242721286 | 0.000812429 | 0.016216216 | 0          | 1.186001977 | 0.00786844  | 0.009009009 | 0.0763986  |
| biological_process | peptidyl-serine modification                                                                              | GO:0018209 | 16403 | 134  | 1.156490114 | 0.000814988 | 0.077477477 | 0          | 1.157058685 | 0.000783916 | 0.052252252 | 0.0328764  |
| biological_process | regulation of ossification                                                                                | GO:0030278 | 16387 | 150  | 1.147397682 | 0.000841538 | 0.077477477 | 0          | 1.100870338 | 0.0157971   | 0.232432432 | 0.108796   |
| biological_process | nuclear import                                                                                            | GO:0051170 | 16344 | 193  | 1.129749212 | 0.000843468 | 0.023423423 | 0          | 1.089847255 | 0.0148291   | 0.171171171 | 0.105163   |
| biological_process | cardiac septum development                                                                                | GO:0003279 | 16486 | 51   | 1.253265209 | 0.00085172  | 0.036036036 | 0.00143995 | 1.246976641 | 0.00110787  | 0.084684685 | 0.0423314  |
| biological_process | positive regulation of intracellular protein transport                                                    | GO:0090316 | 16449 | 88   | 1.192489026 | 0.00085649  | 0.010810811 | 0.00143791 | 1.056627914 | 0.178131    | 0.313513514 | 0.372983   |
| biological_process | cellular lipid metabolic process                                                                          | GO:0044255 | 15851 | 686  | 1.067625168 | 0.000863825 | 0.099099099 | 0.00143589 | 1.016764132 | 0.218678    | 0.315315315 | 0.417906   |
| biological_process | ventricular cardiac muscle tissue development                                                             | GO:0003229 | 16495 | 42   | 1.278730287 | 0.00086588  | 0.014414414 | 0.00143384 | 1.077835864 | 0.190845    | 0.214414414 | 0.386275   |
| molecular_function | A polymerase II core promoter proximal region sequence-specific DNA binding transcription factor activity | GO:0000982 | 16773 | 88   | 1.192286268 | 0.00086514  | 0.009009009 | 0          | 1.183490261 | 0.00139836  | 0.041441441 | 0          |
| biological_process | ARF protein signal transduction                                                                           | GO:0032011 | 16498 | 39   | 1.289119316 | 0.000870974 | 0.072072072 | 0.00142977 | 1.375577829 | 2.38E-05    | 0.023423423 | 0.00334527 |
| biological_process | regulation of ARF protein signal transduction                                                             | GO:0032012 | 16498 | 39   | 1.289119316 | 0.000870974 | 0.072072072 | 0.00142977 | 1.375577829 | 2.38E-05    | 0.023423423 | 0.00334527 |
| biological_process | glycoprotein biosynthetic process                                                                         | GO:0009101 | 16313 | 224  | 1.119865111 | 0.000878474 | 0.072072072 | 0.00142778 | 1.138539698 | 0.000149591 | 0.034234234 | 0.0106793  |
| biological_process | regulation of organelle organization                                                                      | GO:0033043 | 16074 | 463  | 1.082704152 | 0.000884817 | 0.043243243 | 0.00142578 | 1.094815836 | 0.000169077 | 0.016216216 | 0.0105681  |
| molecular_function | L-amino acid transmembrane transporter activity                                                           | GO:0015179 | 16833 | 28   | 1.340822147 | 0.000884957 | 0.041441441 | 0          | 1.116530698 | 0.142554    | 0.309909991 | 0.288111   |
| biological_process | appendage development                                                                                     | GO:0048736 | 16409 | 128  | 1.158869028 | 0.00088822  | 0.023423423 | 0.00142174 | 1.123401351 | 0.00760102  | 0.151351351 | 0.0763155  |
| biological_process | limb development                                                                                          | GO:0060173 | 16409 | 128  | 1.158869028 | 0.00088822  | 0.023423423 | 0.00142174 | 1.123401351 | 0.00760102  | 0.151351351 | 0.0763155  |
| biological_process | neuromuscular junction development                                                                        | GO:0007528 | 16504 | 33   | 1.313574202 | 0.000894558 | 0.036036036 | 0.00141976 | 1.334067019 | 0.000438484 | 0.041441441 | 0.0201029  |
| biological_process | lipid biosynthetic process                                                                                | GO:0008610 | 16073 | 464  | 1.082489689 | 0.000898895 | 0.088288288 | 0.00141778 | 1.015009034 | 0.285058    | 0.326126126 | -1         |
| cellular_component | extracellular vesicular exosome                                                                           | GO:0070062 | 16769 | 54   | 1.244481657 | 0.000914066 | 0.068468468 | 0          | 1.072758189 | 0.176819    | 0.353153153 | 0.294197   |
| biological_process | reproduction                                                                                              | GO:0000003 | 15512 | 1025 | 1.054345157 | 0.000930945 | 0.082882883 | 0.00141596 | 1.048018182 | 0.00298039  | 0.198198198 | 0.0572627  |
| biological_process | regulation of actin filament-based process                                                                | GO:0032970 | 16348 | 189  | 1.129901154 | 0.000932175 | 0.052252252 | 0.00141397 | 1.09437599  | 0.0119063   | 0.061261261 | 0.09008475 |
| biological_process | negative regulation of insulin receptor signaling pathway                                                 | GO:0046627 | 16515 | 22   | 1.382539568 | 0.000935849 | 0.01981982  | 0.00141199 | 1.224847119 | 0.037836    | 0.095495495 | 0.153706   |
| biological_process | positive regulation of cellular component biogenesis                                                      | GO:0044089 | 16517 | 20   | 1.400887456 | 0.000944423 | 0.05045045  | 0.00141005 | 1.218561299 | 0.0451336   | 0.230630631 | 0.177479   |
| molecular_function | transcription corepressor activity                                                                        | GO:0003714 | 16746 | 115  | 1.166627017 | 0.00094941  | 0.021621622 | 0          | 1.205211356 | 6.54E-05    | 0.025225225 | 0          |
| biological_process | regulation of skeletal muscle tissue development                                                          | GO:0048641 | 16472 | 65   | 1.221703257 | 0.000960947 | 0.01981982  | 0.00140816 | 1.177242334 | 0.00657022  | 0.054054054 | 0.0688354  |
| biological_process | organic anion transport                                                                                   | GO:0015711 | 16302 | 235  | 1.11597388  | 0.000963144 | 0.10990991  | 0.0014062  | 0.998544385 | 0.515548    | 0.49009009  | -1         |
| biological_process | heart valve morphogenesis                                                                                 | GO:0003179 | 16512 | 25   | 1.35757615  | 0.000970621 | 0.01981982  | 0.00140427 | 1.09188972  | 0.212913    | 0.291891892 | 0.411819   |
| cellular_component | apical junction complex                                                                                   | GO:0043296 | 16720 | 103  | 1.175678927 | 0.000975139 | 0.068468468 | 0          | 1.161517458 | 0.0021998   | 0.144144144 | 0          |
| biological_process | negative regulation of multicellular organismal process                                                   | GO:0051241 | 16243 | 294  | 1.103337721 | 0.000978764 | 0.063063063 | 0.00140234 | 1.064845038 | 0.0260043   | 0.147747748 | 0.136671   |
| biological_process | negative regulation of cellular response to insulin stimulus                                              | GO:1900077 | 16514 | 23   | 1.372259222 | 0.000986044 | 0.018018018 | 0.00140042 | 1.189596289 | 0.0575135   | 0.153151315 | 0.198461   |
| biological_process | appendage morphogenesis                                                                                   | GO:0035107 | 16417 | 120  | 1.162417686 | 0.000990951 | 0.018018018 | 0.00139654 | 1.142927155 | 0.00324653  | 0.093693694 | 0.056372   |
| biological_process | limb morphogenesis                                                                                        | GO:0035108 | 16417 | 120  | 1.162417686 | 0.000990951 | 0.018018018 | 0.00139654 | 1.142927155 | 0.00324653  | 0.093693694 | 0.056372   |
| molecular_function | RNA polymerase II regulatory region DNA binding                                                           | GO:0001012 | 16777 | 84   | 1.194305336 | 0.000993216 | 0.016216213 | 0          | 1.321453422 | 1.56E-07    | 0.001801802 | 0          |
| biological_process | regulation of blood vessel endothelial cell migration                                                     | GO:0043535 | 16501 | 36   | 1.297158326 | 0.000995545 | 0.007207207 | 0.00278535 | 1.07832152  | 0.207594    | 0.241441441 | 0.040738   |
| cellular_component | actin filament                                                                                            | GO:0005884 | 16769 | 54   | 1.242414503 | 0.000999213 | 0.007207207 | 0          | 1.237593345 | 0.00122681  | 0.002702702 | 0          |
| biological_process | negative regulation of organelle organization                                                             | GO:0010639 | 16393 | 144  | 1.147982868 | 0.00100319  | 0.009009009 | 0.00278157 | 1.113373906 | 0.08987221  | 0.032423432 | 0.076982   |
| cellular_component | histone deacetylase complex                                                                               | GO:0000118 | 16774 | 49   | 1.254105597 | 0.00101628  | 0.01981982  | 0          | 1.112915093 | 0.0851813   | 0.257657658 | 0.132434   |
| cellular_component | cell-cell contact zone                                                                                    | GO:0044291 | 16782 | 41   | 1.277522345 | 0.00102912  | 0.064864685 | 0          | 1.163831621 | 0.0344382   | 0.228828829 | 0.0347931  |
| biological_process | regulation of glutamate receptor signaling pathway                                                        | GO:1900449 | 16514 | 23   | 1.370645016 | 0.00103158  | 0.117117117 | 0.00277803 | 1.280948788 | 0.00976195  | 0.12972973  | 0.0809581  |
| biological_process | G-protein coupled receptor signaling pathway, coupled to cyclic nucleotide second messenger               | GO:0007187 | 16443 | 94   | 1.182715301 | 0.00104518  | 0.075675676 | 0.00277433 | 1.091820529 | 0.0610155   | 0.264864865 | 0.206182   |
| biological_process | negative regulation of phosphorylation                                                                    | GO:0042326 | 16342 | 195  | 1.126435167 | 0.00104802  | 0.052252252 | 0.00277052 | 1.062073468 | 0.0654968   | 0.190990991 | 0.218439   |
| biological_process | anion transport                                                                                           | GO:0006820 | 16221 | 316  | 1.098915085 | 0.00105216  | 0.099099099 | 0.00276673 | 0.96827574  | 0.838031    | 0.655855856 | -1         |
| cellular_component | intercalated disc                                                                                         | GO:0014704 | 16785 | 38   | 1.287290778 | 0.00106885  | 0.068468468 | 0          | 1.146361078 | 0.0688501   | 0.257657658 | 0.0587146  |
| biological_process | negative regulation of protein modification process                                                       | GO:0031400 | 16297 | 240  | 1.113615774 | 0.00106697  | 0.052252252 | 0.00276308 | 1.068588012 | 0.0318792   | 0.118918919 | 0.150211   |
| biological_process | collagen biosynthetic process                                                                             | GO:0032964 | 16511 | 26   | 1.347362994 | 0.00106931  | 0.012612613 | 0.00275929 | 1.059874949 | 0.29834     | 0.308108108 | 0          |
| biological_process | positive regulation of cellular catabolic process                                                         | GO:0031331 | 16450 | 87   | 1.18880215  | 0.00111311  | 0.014414414 | 0.00275599 | 1.134530581 | 0.0146606   | 0.032423432 | 0.104416   |
| biological_process | regulation of ion homeostasis                                                                             | GO:2000021 | 16416 | 121  | 1.159817105 | 0.00112112  | 0.084684685 | 0.00275228 | 1.131012823 | 0.00611859  | 0.109909991 | 0.0647818  |
| molecular_function | DNA binding, bending                                                                                      | GO:0008301 | 16822 | 39   | 1.282198084 | 0.00112114  | 0.005405405 | 0          | 1.14876187  | 0.0535906   | 0.228828829 | 0.0966439  |
| molecular_function | core promoter sequence-specific DNA binding                                                               | GO:0001046 | 16826 | 35   | 1.297776048 | 0.00112706  | 0.001801802 | 0          | 1.329716018 | 0.000359578 | 0.005405405 | 0          |
| biological_process | adult locomotory behavior                                                                                 | GO:0008344 | 16463 | 74   | 1.204440619 | 0.001133    | 0.117117117 | 0.00411729 | 1.203607155 | 0.00118089  | 0.109090901 | 0.0413152  |
| biological_process | regulation of carbohydrate biosynthetic process                                                           | GO:0043255 | 16484 | 53   | 1.241225587 | 0.00115703  | 0.012612613 | 0.00411205 | 1.164797576 | 0.0187007   | 0.104504505 | 0.115811   |
| biological_process | regulation of muscle contraction                                                                          | GO:0006937 | 16447 | 90   | 1.184445143 | 0.00118667  | 0.054054054 | 0.00546841 | 1.137736398 | 0.0116214   | 0.117117117 | 0.0902691  |
| biological_process | response to steroid hormone stimulus                                                                      | GO:0048545 | 16176 | 361  | 1.091327249 | 0.00118758  | 0.088288288 | 0.00546096 | 1.013272889 | 0.329419    | 0.414414414 | -1         |
| biological_process | ceramide biosynthetic process                                                                             | GO:0046513 | 16509 | 28   | 1.331111989 | 0.00119356  | 0.009009009 | 0.00545365 | 0.952458971 | 0.668637    | 0.727927928 | -1         |
| biological_process | positive regulation of Rho GTPase activity                                                                | GO:0032321 | 16477 | 60   | 1.225861682 | 0.00119954  | 0.027027027 | 0.00544635 | 1.232970586 | 0.000870052 | 0.009009009 | 0.0343147  |
| biological_process | neuron-neuron synaptic transmission                                                                       | GO:0007270 | 16435 | 102  | 1.172975699 | 0.00120177  | 0.2         | 0.005439   | 1.069240404 | 0.112197    | 0.347747748 | 0.277668   |
| biological_process | negative regulation of protein kinase activity                                                            | GO:0006469 | 16405 | 132  | 1.15191475  | 0.00120199  | 0.05045045  | 0.00543162 | 1.043733783 | 0.191147    | 0.313513514 | 0.386556   |
| molecular_function | transcription regulatory region sequence-specific DNA binding                                             | GO:0000976 | 16731 | 130  | 1.153025747 | 0.00120762  | 0.009009009 | 0          | 1.245377292 | 5.73E-07    | 0.005405405 | 0          |
| biological_process | negative regulation of cell death                                                                         | GO:0060548 | 15994 | 543  | 1.073922945 | 0.00120776  | 0.01981982  | 0.00542438 | 1.063029975 | 0.00484439  | 0.077477477 | 0.0612572  |
| biological_process | segmentation                                                                                              | GO:0035282 | 16462 | 75   | 1.201751875 | 0.00120994  | 0.009009009 | 0.00541708 | 1.095296086 | 0.075976    | 0.194594595 | 0.229985   |
| biological_process | cardiac muscle cell differentiation                                                                       | GO:0055007 | 16472 | 65   | 1.216337508 | 0.00123511  | 0.028828829 | 0.0054103  | 1.203369662 | 0.00221696  | 0.032423432 | 0.0498825  |
| molecular_function | motor proximal region sequence-specific DNA binding transcription factor activity involved in positive    | GO:0001077 | 16804 | 57   | 1.231015402 | 0.00123864  | 0.007207207 | 0          | 1.140653334 | 0.0327062   | 0.041441441 | 0.0520131  |
| biological_process | sodium ion transport                                                                                      | GO:0006814 | 16408 | 129  | 1.153185452 | 0.00124191  | 0.086486486 | 0.00540314 | 1.111458532 | 0.013861    | 0.216216216 | 0.0999156  |
| biological_process | anterior/posterior pattern specification                                                                  | GO:0009952 | 16368 | 169  | 1.13355954  | 0.00125238  | 0.055855856 | 0.00539608 | 1.133466513 | 0.00126125  | 0.118918919 | 0.0444236  |
| biological_process | glycogen metabolic process                                                                                | GO:0005977 | 16479 | 58   | 1.228414293 | 0.00127093  | 0.005405405 | 0.00538921 | 1.119513219 | 0.05714     | 0.055855856 | 0.198166   |
| biological_process | amine transport                                                                                           | GO:0015837 | 16465 | 72   | 1.204865522 | 0.00127438  | 0.111711712 | 0.00538203 | 1.037775035 | 0.288988    | 0.362162162 | -1         |
| biological_process | GTP catabolic process                                                                                     | GO:0006184 | 16106 | 431  | 1.082710109 | 0.00129096  | 0.113513514 | 0.00537516 | 1.07958715  | 0.00186722  | 0.077477477 | 0.0478263  |
| biological_process | negative regulation of cell motility                                                                      | GO:2000146 | 16418 | 119  | 1.15876121  | 0.00130398  | 0.036036036 | 0.00536822 | 1.10225759  | 0.026247    | 0.194594595 | 0.137031   |
| molecular_function | glutamate receptor binding                                                                                | GO:0035254 | 16829 | 32   | 1.306926172 | 0.0013055   | 0.106306306 | 0          | 1.150757616 | 0.0696318   | 0.25045045  | 0.112561   |
| biological_process | negative regulation of axonogenesis                                                                       | GO:0050771 | 16503 | 34   | 1.297646805 | 0.00130964  | 0.061261261 |            |             |             |             |            |

|                    |                                                                                                          |            |       |     |             |            |             |            |             |             |             |            |
|--------------------|----------------------------------------------------------------------------------------------------------|------------|-------|-----|-------------|------------|-------------|------------|-------------|-------------|-------------|------------|
| biological_process | negative regulation of MAP kinase activity                                                               | GO:0043407 | 16484 | 53  | 1.236326619 | 0.00141893 | 0.034234234 | 0.00532067 | 1.008571373 | 0.456918    | 0.461261261 | -1         |
| biological_process | glutamate secretion                                                                                      | GO:0014047 | 16516 | 21  | 1.375687688 | 0.00142321 | 0.073873874 | 0.0053137  | 0.985145706 | 0.546978    | 0.515315315 | -1         |
| biological_process | cardiac muscle tissue morphogenesis                                                                      | GO:0055008 | 16485 | 52  | 1.238340986 | 0.00143376 | 0.014414414 | 0.00530687 | 1.137989016 | 0.0421567   | 0.048648649 | 0.171353   |
| biological_process | vesicle localization                                                                                     | GO:0051648 | 16436 | 101 | 1.170489133 | 0.00145636 | 0.091891892 | 0.00530031 | 1.109902392 | 0.0274978   | 0.192792793 | 0.140978   |
| biological_process | artery development                                                                                       | GO:0060840 | 16490 | 47  | 1.250226068 | 0.00146243 | 0.036036036 | 0.00529342 | 1.227351529 | 0.00343054  | 0.106306306 | 0.0572455  |
| biological_process | regulation of extrinsic apoptotic signaling pathway                                                      | GO:2001236 | 16512 | 25  | 1.343189841 | 0.00146786 | 0.012612613 | 0.00528654 | 1.147813695 | 0.100087    | 0.135135135 | 0.262622   |
| biological_process | positive regulation of heart contraction                                                                 | GO:0045823 | 16516 | 21  | 1.374115546 | 0.00148238 | 0.075675676 | 0.00527986 | 1.018126138 | 0.442783    | 0.427027027 | -1         |
| biological_process | regulation of BMP signaling pathway                                                                      | GO:0030510 | 16479 | 58  | 1.224682019 | 0.00149389 | 0.043243243 | 0.00527314 | 1.227036062 | 0.00134945  | 0.028828829 | 0.0438764  |
| biological_process | neural crest cell migration                                                                              | GO:0001755 | 16507 | 30  | 1.312670128 | 0.00149399 | 0.043243243 | 0.0052662  | 1.20275724  | 0.0270976   | 0.030630631 | 0.139476   |
| biological_process | protein localization to plasma membrane                                                                  | GO:0072659 | 16473 | 64  | 1.213589777 | 0.00151169 | 0.023423423 | 0.00525964 | 1.155736082 | 0.0153041   | 0.05045045  | 0.106262   |
| biological_process | cellular response to hormone stimulus                                                                    | GO:0032870 | 16228 | 309 | 1.096433116 | 0.00151915 | 0.09009009  | 0.00525288 | 1.093192555 | 0.00208969  | 0.117117117 | 0.0504378  |
| molecular_function | SMAD binding                                                                                             | GO:0046332 | 16803 | 58  | 1.22421438  | 0.0015245  | 0.118918919 | 0.0086113  | 1.306063438 | 2.62E-05    | 0.055855856 | 0          |
| biological_process | regulation of phosphatidylinositol 3-kinase cascade                                                      | GO:0014066 | 16490 | 47  | 1.248967839 | 0.00153538 | 0.032432432 | 0.00524633 | 1.088321162 | 0.146808    | 0.315315315 | 0.337043   |
| molecular_function | G-protein coupled receptor activity                                                                      | GO:0004930 | 16468 | 393 | 1.085172557 | 0.00154173 | 0.113513514 | 0.0085385  | 1.060213156 | 0.018214    | 0.216216216 | 0.0289749  |
| biological_process | epithelial cell proliferation                                                                            | GO:0050673 | 16305 | 232 | 1.111341833 | 0.00154682 | 0.01981982  | 0.00523969 | 1.127970259 | 0.000336976 | 0.072072072 | 0.0140845  |
| molecular_function | anion transmembrane transporter activity                                                                 | GO:0008509 | 16655 | 206 | 1.118140774 | 0.00156275 | 0.037837838 | 0.00846707 | 0.949777955 | 0.895483    | 0.708108108 | -1         |
| biological_process | cranial nerve development                                                                                | GO:0021545 | 16507 | 30  | 1.311194733 | 0.00156353 | 0.003603604 | 0.00523317 | 1.392663944 | 9.63E-05    | 0.009009009 | 0.00872819 |
| molecular_function | histone deacetylase binding                                                                              | GO:0042826 | 16802 | 59  | 1.221475605 | 0.00157977 | 0.009090909 | 0.00839667 | 1.134584757 | 0.0364301   | 0.145945946 | 0.0549655  |
| molecular_function | protein homodimerization activity                                                                        | GO:0042803 | 16349 | 512 | 1.074103608 | 0.00159191 | 0.005405405 | 0.00832724 | 1.032421007 | 0.0984546   | 0.154954955 | 0.178279   |
| biological_process | regulation of hormone levels                                                                             | GO:0010817 | 16255 | 282 | 1.100533781 | 0.00159224 | 0.043243243 | 0.00522692 | 1.068327597 | 0.0225098   | 0.118918919 | 0.128725   |
| biological_process | male sex differentiation                                                                                 | GO:0046661 | 16430 | 107 | 1.164006781 | 0.00159926 | 0.003603604 | 0.00522024 | 1.075253652 | 0.0880869   | 0.090909099 | 0.247645   |
| biological_process | negative regulation of intracellular protein kinase cascade                                              | GO:0010741 | 16404 | 133 | 1.146981778 | 0.00160001 | 0.014414414 | 0.00521345 | 1.049925417 | 0.158354    | 0.223423423 | 0.348538   |
| biological_process | establishment of protein localization to plasma membrane                                                 | GO:0090002 | 16495 | 42  | 1.262234312 | 0.00160258 | 0.023423423 | 0.00520671 | 1.18324137  | 0.0197233   | 0.117117117 | 0.122843   |
| biological_process | negative regulation of cytoskeleton organization                                                         | GO:0051494 | 16466 | 71  | 1.201137008 | 0.00163135 | 0.010810811 | 0.00520052 | 1.164643893 | 0.00801839  | 0.043243243 | 0.0771849  |
| biological_process | positive regulation of immune response                                                                   | GO:0050778 | 16306 | 231 | 1.11096471  | 0.0016321  | 0.005405405 | 0.00519379 | 0.952431225 | 0.896378    | 0.888288288 | -1         |
| cellular_component | axon terminus                                                                                            | GO:0043679 | 16745 | 78  | 1.191848062 | 0.00163259 | 0.100909091 | 0          | 1.241900212 | 0.000104016 | 0.01981982  | 0          |
| biological_process | regulation of adaptive immune response                                                                   | GO:0002819 | 16449 | 88  | 1.180454718 | 0.00164165 | 0.016216216 | 0.00518724 | 0.954930658 | 0.768627    | 0.769369369 | -1         |
| biological_process | negative regulation of transferase activity                                                              | GO:0051348 | 16386 | 151 | 1.137452421 | 0.00164677 | 0.046846847 | 0.00518063 | 1.023494143 | 0.307718    | 0.36036036  | -1         |
| biological_process | dendritic spine organization                                                                             | GO:0097061 | 16513 | 24  | 1.346055977 | 0.00164878 | 0.10990991  | 0.00517397 | 1.438368936 | 9.87E-05    | 0.063063063 | 0.00865284 |
| biological_process | regulation of intracellular transport                                                                    | GO:0032386 | 16300 | 237 | 1.109347557 | 0.00165796 | 0.028828829 | 0.00516746 | 1.068969885 | 0.0319893   | 0.187387387 | 0.150005   |
| biological_process | cellular glucan metabolic process                                                                        | GO:0006073 | 16478 | 59  | 1.220328678 | 0.00165944 | 0.003603604 | 0.00515418 | 1.102938651 | 0.0850413   | 0.079279279 | 0.243745   |
| biological_process | glucan metabolic process                                                                                 | GO:0044042 | 16478 | 59  | 1.220328678 | 0.00165944 | 0.003603604 | 0.00515418 | 1.102938651 | 0.0850413   | 0.079279279 | 0.243745   |
| molecular_function | nuclear hormone receptor binding                                                                         | GO:0035257 | 16770 | 91  | 1.177031883 | 0.00167833 | 0.095495495 | 0.00826185 | 1.282579113 | 1.42E-06    | 0.009009009 | 0          |
| biological_process | regulation of protein localization                                                                       | GO:0032880 | 16192 | 345 | 1.090144718 | 0.00169024 | 0.041441441 | 0.00514815 | 1.046433209 | 0.0655754   | 0.246846847 | 0.218181   |
| biological_process | myoblast differentiation                                                                                 | GO:0045445 | 16487 | 50  | 1.238787512 | 0.00170031 | 0.027027027 | 0.00514173 | 1.201631747 | 0.00669495  | 0.028828829 | 0.0697873  |
| cellular_component | vacuole                                                                                                  | GO:0005773 | 16508 | 315 | 1.094336721 | 0.00170786 | 0.095495495 | 0          | 1.050291532 | 0.0593032   | 0.198198198 | 0.0584002  |
| molecular_function | phosphatase binding                                                                                      | GO:0011902 | 16750 | 111 | 1.159749033 | 0.00172353 | 0.133333333 | 0.00819589 | 1.097430715 | 0.0372172   | 0.21981982  | 0.0586297  |
| biological_process | forebrain cell migration                                                                                 | GO:0021885 | 16495 | 42  | 1.259930807 | 0.00174201 | 0.093693694 | 0.00513595 | 1.197635396 | 0.031166    | 0.18018018  | 0.0985445  |
| biological_process | regulation of neurotransmitter secretion                                                                 | GO:0046928 | 16504 | 33  | 1.293275612 | 0.00174456 | 0.032432432 | 0.00512941 | 1.238320267 | 0.00806888  | 0.088288288 | 0.0774798  |
| biological_process | positive regulation of epithelial to mesenchymal transition                                              | GO:0010718 | 16514 | 23  | 1.351264026 | 0.00175084 | 0.010810811 | 0.00512296 | 1.169232054 | 0.0797561   | 0.252252252 | 0.236785   |
| molecular_function | calmodulin binding                                                                                       | GO:0005516 | 16730 | 131 | 1.146505681 | 0.00177383 | 0.124324324 | 0.0240032  | 1.197734322 | 4.15E-05    | 0.044141414 | 0          |
| biological_process | regulation of heart rate                                                                                 | GO:0002027 | 16484 | 53  | 1.230850362 | 0.00177497 | 0.010810811 | 0.00511688 | 1.18012425  | 0.011455    | 0.028828829 | 0.088819   |
| biological_process | regulation of long-term neuronal synaptic plasticity                                                     | GO:0046169 | 16507 | 30  | 1.306841109 | 0.00178631 | 0.135135135 | 0.00511056 | 1.074534942 | 0.239562    | 0.390990991 | 0.442352   |
| biological_process | positive regulation of blood vessel endothelial cell migration                                           | GO:0043536 | 16516 | 21  | 1.366778883 | 0.00178932 | 0.005405405 | 0.0051041  | 1.173071396 | 0.084632    | 0.079279279 | 0.243863   |
| molecular_function | cell adhesion molecule binding                                                                           | GO:0050839 | 16813 | 48  | 1.242345515 | 0.00179357 | 0.115315315 | 0.0238148  | 1.309357676 | 0.000100533 | 0.077477477 | 0          |
| biological_process | regulation of muscle cell differentiation                                                                | GO:0051147 | 16452 | 85  | 1.18185676  | 0.00179834 | 0.009090909 | 0.00509777 | 1.133131737 | 0.0165272   | 0.108108108 | 0.111177   |
| biological_process | endothelial cell differentiation                                                                         | GO:0045446 | 16494 | 43  | 1.255919361 | 0.00180428 | 0.027027027 | 0.00509139 | 1.188092257 | 0.0162136   | 0.136936937 | 0.110586   |
| biological_process | regulation of glycogen metabolic process                                                                 | GO:0070873 | 16511 | 26  | 1.329004282 | 0.00181873 | 0.003603604 | 0.0050852  | 1.155175599 | 0.0851034   | 0.151351351 | 0.243471   |
| biological_process | female sex differentiation                                                                               | GO:0046660 | 16418 | 119 | 1.153181986 | 0.00183708 | 0.036036036 | 0.00634082 | 1.114320503 | 0.0150861   | 0.082882883 | 0.105721   |
| biological_process | protein localization to nucleus                                                                          | GO:0034504 | 16314 | 223 | 1.111486572 | 0.00184634 | 0.025225225 | 0.00633301 | 1.079235696 | 0.0195394   | 0.178378378 | 0.121361   |
| biological_process | hormone metabolic process                                                                                | GO:0042445 | 16426 | 111 | 1.158493323 | 0.00185344 | 0.025225225 | 0.00632516 | 1.040113092 | 0.231351    | 0.2         | 0.430567   |
| biological_process | cyclic nucleotide metabolic process                                                                      | GO:0009187 | 16419 | 118 | 1.153372232 | 0.00188918 | 0.054054054 | 0.00631802 | 1.129349408 | 0.00729306  | 0.120720721 | 0.0749689  |
| molecular_function | protein C-terminus binding                                                                               | GO:0008022 | 16709 | 152 | 1.134995951 | 0.00189055 | 0.084684685 | 0.0236375  | 1.068004729 | 0.0723132   | 0.225225225 | 0.11682    |
| biological_process | spinal cord development                                                                                  | GO:0021510 | 16462 | 75  | 1.192414157 | 0.00190915 | 0.009090909 | 0.00631052 | 1.240512031 | 0.000149639 | 0.007207207 | 0.0106509  |
| biological_process | rhythmic process                                                                                         | GO:0048511 | 16329 | 208 | 1.115011554 | 0.00191882 | 0.095495495 | 0.00630279 | 1.04039876  | 0.154947    | 0.320720721 | 0.344621   |
| cellular_component | extrinsic to membrane                                                                                    | GO:0019898 | 16696 | 127 | 1.147555104 | 0.00191934 | 0.063063063 | 0          | 1.074562227 | 0.0720053   | 0.227027027 | 0.11029    |
| biological_process | negative regulation of cell-cell adhesion                                                                | GO:0022408 | 16507 | 30  | 1.30421281  | 0.00193441 | 0.001801802 | 0.00629522 | 1.207219704 | 0.0245544   | 0.005405405 | 0.135558   |
| molecular_function | voltage-gated calcium channel activity                                                                   | GO:0005245 | 16832 | 29  | 1.309261817 | 0.00194378 | 0.081081081 | 0.0234584  | 1.469471163 | 5.86E-06    | 0.025225225 | 0          |
| biological_process | regulation of protein complex assembly                                                                   | GO:0043254 | 16359 | 178 | 1.124251456 | 0.00194583 | 0.003603604 | 0.00628758 | 1.036119099 | 0.200703    | 0.25045045  | 0.396382   |
| biological_process | negative regulation of hydrolase activity                                                                | GO:0051346 | 16341 | 196 | 1.118287879 | 0.00195406 | 0.030630631 | 0.00627987 | 1.016950116 | 0.339663    | 0.34954955  | -1         |
| biological_process | ureteric bud development                                                                                 | GO:0001657 | 16446 | 91  | 1.174146955 | 0.00195495 | 0.023423423 | 0.00627202 | 1.210922854 | 0.00023732  | 0.027027027 | 0.014804   |
| biological_process | negative regulation of canonical Wnt receptor signaling pathway                                          | GO:0090090 | 16462 | 75  | 1.191906234 | 0.00195608 | 0.066666667 | 0.00626418 | 1.196234059 | 0.00158771  | 0.082882883 | 0.0441475  |
| biological_process | regulation of pathway-restricted SMAD protein phosphorylation                                            | GO:0060393 | 16508 | 29  | 1.308847919 | 0.00196767 | 0.027027027 | 0.00625662 | 1.041658823 | 0.348687    | 0.405405405 | -1         |
| biological_process | regulation of muscle system process                                                                      | GO:0090257 | 16431 | 106 | 1.161149019 | 0.00196991 | 0.063063063 | 0.00624885 | 1.122915619 | 0.0139408   | 0.131531532 | 0.100659   |
| biological_process | cellular divalent inorganic cation homeostasis                                                           | GO:0072503 | 16312 | 225 | 1.110174194 | 0.00197494 | 0.084684685 | 0.00624117 | 1.066890569 | 0.0400787   | 0.210810811 | 0.165785   |
| biological_process | regulation of phosphatase activity                                                                       | GO:0010921 | 16448 | 89  | 1.175867178 | 0.00197913 | 0.18018018  | 0.00623348 | 1.216280878 | 0.000197324 | 0.081081081 | 0.0128069  |
| molecular_function | ption regulatory region sequence-specific DNA binding transcription factor activity involved in positive | GO:0001228 | 16800 | 61  | 1.212514703 | 0.00198761 | 0.012612613 | 0.0232809  | 1.135721554 | 0.0329305   | 0.03963964  | 0.0515117  |
| molecular_function | SH2 domain binding                                                                                       | GO:0042169 | 16830 | 31  | 1.298021576 | 0.00200916 | 0.045045045 | 0.0231038  | 1.196380486 | 0.0290066   | 0.055855856 | 0.0533677  |
| biological_process | hindlimb morphogenesis                                                                                   | GO:0035137 | 16503 | 34  | 1.284123537 | 0.00203627 | 0.005405405 | 0.00622704 | 1.225178879 | 0.0114067   | 0.100909091 | 0.0890002  |
| biological_process | glycerolipid metabolic process                                                                           | GO:0046486 | 16305 | 232 | 1.108026573 | 0.00205201 | 0.054054054 | 0.00621965 | 1.058235123 | 0.0609042   | 0.165765766 | 0.206277   |
| biological_process | mesoderm formation                                                                                       | GO:0001707 | 16486 | 51  | 1.231553998 | 0.00206138 | 0.007207207 | 0.00621214 | 1.073780171 | 0.180361    | 0.282882883 | 0.375346   |
| biological_process | multicellular                                                                                            |            |       |     |             |            |             |            |             |             |             |            |

|                    |                                                                                                |             |       |      |             |            |             |            |             |             |             |            |
|--------------------|------------------------------------------------------------------------------------------------|-------------|-------|------|-------------|------------|-------------|------------|-------------|-------------|-------------|------------|
| biological_process | regulation of receptor activity                                                                | GO:0010469  | 16476 | 61   | 1.210390819 | 0.00217638 | 0.178378378 | 0.00735714 | 1.308446492 | 1.46E-05    | 0.025225225 | 0          |
| cellular_component | contractile fiber                                                                              | GO:0043292  | 16669 | 154  | 1.132010538 | 0.0021823  | 0.016216216 | 0          | 1.133801425 | 0.00193052  | 0.054054054 | 0          |
| biological_process | positive regulation of protein kinase B signaling cascade                                      | GO:0051897  | 16479 | 58   | 1.215632819 | 0.00218991 | 0.016216216 | 0.00734849 | 1.095733005 | 0.102935    | 0.176576577 | 0.264057   |
| biological_process | purine-containing compound metabolic process                                                   | GO:0072521  | 15765 | 772  | 1.057771546 | 0.00220379 | 0.064864865 | 0.00733988 | 1.048900041 | 0.00797295  | 0.100900901 | 0.0774526  |
| biological_process | metal ion homeostasis                                                                          | GO:0055065  | 16273 | 264  | 1.10015133  | 0.00224691 | 0.077477477 | 0.00733206 | 1.057636613 | 0.0510189   | 0.218018018 | 0.185209   |
| biological_process | cell differentiation involved in kidney development                                            | GO:0061005  | 16504 | 33   | 1.285136386 | 0.00225616 | 0.007207207 | 0.00732335 | 1.209233805 | 0.018583    | 0.162162162 | 0.116103   |
| biological_process | homophilic cell adhesion                                                                       | GO:0007156  | 16435 | 102  | 1.1616328   | 0.00228278 | 0.273873874 | 0.00731513 | 1.209992176 | 0.000114443 | 0.203603604 | 0.00841137 |
| biological_process | programmed cell death                                                                          | GO:0012501  | 15276 | 1261 | 1.044309755 | 0.00228897 | 0.034234234 | 0.00730639 | 1.039303605 | 0.00595068  | 0.122522523 | 0.0654176  |
| biological_process | oligodendrocyte differentiation                                                                | GO:0048709  | 16471 | 66   | 1.200975479 | 0.00230097 | 0.023423423 | 0.00729782 | 1.103894787 | 0.071483    | 0.057657658 | 0.223292   |
| biological_process | cell-substrate adherens junction assembly                                                      | GO:0007045  | 16504 | 33   | 1.28448774  | 0.00230228 | 0.108108108 | 0.00728014 | 1.33307023  | 0.000454368 | 0.104504050 | 0.0220921  |
| biological_process | focal adhesion assembly                                                                        | GO:0048041  | 16504 | 33   | 1.28448774  | 0.00230228 | 0.108108108 | 0.00728014 | 1.33307023  | 0.000454368 | 0.104504050 | 0.0220921  |
| molecular_function | carbohydrate derivative binding                                                                | GO:0097367  | 16714 | 147  | 1.134282454 | 0.00230988 | 0.073873874 | 0.0229575  | 1.033649562 | 0.238941    | 0.369369369 | 0.428937   |
| biological_process | regulation of dendritic spine development                                                      | GO:0060998  | 16513 | 24   | 1.333549385 | 0.00231041 | 0.066666667 | 0.00727153 | 1.318336894 | 0.00343415  | 0.097297297 | 0.0571603  |
| biological_process | negative regulation of protein kinase B signaling cascade                                      | GO:0051898  | 16517 | 20   | 1.365230064 | 0.00232159 | 0.003603604 | 0.00726302 | 1.138351818 | 0.141793    | 0.153153153 | 0.331618   |
| biological_process | e immune response based on somatic recombination of immune receptors built from immunoglobulin | GO:0002822  | 16456 | 81   | 1.180745906 | 0.00236781 | 0.014414414 | 0.00725544 | 0.963672348 | 0.714902    | 0.758558559 | -1         |
| biological_process | myofibril assembly                                                                             | GO:0030239  | 16504 | 33   | 1.283575238 | 0.00236859 | 0.012612613 | 0.0072467  | 1.200332329 | 0.0230064   | 0.117117117 | 0.130086   |
| biological_process | regulation of autophagy                                                                        | GO:0010506  | 16491 | 46   | 1.239602502 | 0.00241141 | 0.120720721 | 0.00723907 | 1.128968916 | 0.0646157   | 0.223423423 | 0.214811   |
| biological_process | ventricular cardiac muscle tissue morphogenesis                                                | GO:0055010  | 16498 | 39   | 1.260200583 | 0.00241734 | 0.009090909 | 0.0072305  | 1.082824503 | 0.184882    | 0.237837838 | 0.37933    |
| biological_process | regulation of systemic arterial blood pressure mediated by a chemical signal                   | GO:0003044  | 16500 | 37   | 1.267084435 | 0.00242308 | 0.023423423 | 0.00722195 | 1.022281318 | 0.407118    | 0.461261261 | -1         |
| biological_process | membrane protein ectodomain proteolysis                                                        | GO:0006509  | 16506 | 31   | 1.291840481 | 0.00242317 | 0.01981982  | 0.00721327 | 1.02243072  | 0.41431     | 0.445045045 | -1         |
| biological_process | positive regulation of chemotaxis                                                              | GO:0050921  | 16472 | 65   | 1.201324947 | 0.00242452 | 0.009090909 | 0.00720464 | 1.228306254 | 0.000700495 | 0.010810811 | 0.0312553  |
| biological_process | actin filament-based movement                                                                  | GO:0030048  | 16482 | 55   | 1.218506879 | 0.00246579 | 0.097297297 | 0.00719706 | 1.273749533 | 0.000213929 | 0.064864865 | 0.0126786  |
| biological_process | catenin import into nucleus                                                                    | GO:0035411  | 16515 | 22   | 1.345808612 | 0.0024674  | 0.018018018 | 0.00718848 | 1.043127281 | 0.362959    | 0.399090991 | -1         |
| biological_process | regulation of actin cytoskeleton organization                                                  | GO:0032956  | 16376 | 161  | 1.12723265  | 0.00247773 | 0.028828829 | 0.00718014 | 1.060388442 | 0.0911536   | 0.115315315 | 0.251495   |
| biological_process | regeneration                                                                                   | GO:0031099  | 16401 | 136  | 1.138478087 | 0.00248653 | 0.023423423 | 0.00717178 | 1.112895209 | 0.0110167   | 0.095495495 | 0.0854351  |
| biological_process | peptidyl-threonine modification                                                                | GO:0018210  | 16481 | 56   | 1.216172852 | 0.00250263 | 0.10590991  | 0.00716363 | 1.289288258 | 8.63E-05    | 0.045045045 | 0.00590417 |
| biological_process | dephosphorylation                                                                              | GO:0016311  | 16262 | 275  | 1.096862658 | 0.00251131 | 0.218018018 | 0.0071553  | 1.134233465 | 5.05E-05    | 0.097297297 | 0.00317612 |
| biological_process | guanosine-containing compound catabolic process                                                | GO:1901069  | 16102 | 435  | 1.076632382 | 0.00251262 | 0.127927928 | 0.00714681 | 1.075436943 | 0.00287541  | 0.079279279 | 0.0535048  |
| molecular_function | neuropeptide receptor binding                                                                  | GO:0071855  | 16841 | 20   | 1.361820348 | 0.00252079 | 0.018018018 | 0.022804   | 1.067341449 | 0.300863    | 0.266666667 | -1         |
| biological_process | response to alcohol                                                                            | GO:0097305  | 16267 | 270  | 1.097691117 | 0.0025296  | 0.097297297 | 0.00949572 | 1.030613054 | 0.189853    | 0.353153153 | 0.385682   |
| biological_process | negative regulation of protein complex disassembly                                             | GO:0043242  | 16499 | 38   | 1.261971834 | 0.00255247 | 0.018018018 | 0.00948523 | 1.259947781 | 0.00272885  | 0.03963964  | 0.0523068  |
| biological_process | cardiac muscle tissue growth                                                                   | GO:0055017  | 16495 | 42   | 1.248709859 | 0.0025923  | 0.003603604 | 0.00947532 | 1.065365265 | 0.231285    | 0.353153153 | 0.430727   |
| biological_process | immune response-activating signal transduction                                                 | GO:0002757  | 16407 | 130  | 1.040696077 | 0.00263893 | 0.001801802 | 0.0106363  | 1.06471231  | 0.0997466   | 0.147747748 | 0.26262    |
| biological_process | negative regulation of microtubule polymerization or depolymerization                          | GO:0031111  | 16512 | 25   | 1.321600702 | 0.00265765 | 0.043243243 | 0.0106244  | 1.311219726 | 0.00349517  | 0.032432432 | 0.056749   |
| cellular_component | trans-Golgi network                                                                            | GO:0005802  | 16718 | 105  | 1.156443797 | 0.00267284 | 0.095495495 | 0          | 1.175690689 | 0.000879975 | 0.010810811 | 0          |
| biological_process | regulation of Rho GTPase activity                                                              | GO:0032319  | 16455 | 82   | 1.177128865 | 0.0026757  | 0.034234234 | 0.0117779  | 1.214923692 | 0.000363271 | 0.027027027 | 0.0139561  |
| cellular_component | brush border                                                                                   | GO:0005903  | 16763 | 60   | 1.207036232 | 0.00269535 | 0.027027027 | 0          | 0.923359982 | 0.848524    | 0.790909091 | -1         |
| biological_process | central nervous system neuron development                                                      | GO:0021954  | 16480 | 57   | 1.212424959 | 0.00269598 | 0.023423423 | 0.0117648  | 1.112143085 | 0.0709195   | 0.21981982  | 0.221451   |
| biological_process | regulation of leukocyte activation                                                             | GO:0002694  | 16277 | 260  | 1.098541273 | 0.0027689  | 0.043243243 | 0.0117754  | 1.06414485  | 0.035482    | 0.142342342 | 0.157613   |
| biological_process | regulation of osteoblast differentiation                                                       | GO:0045667  | 16442 | 95   | 1.163815428 | 0.00277277 | 0.037837838 | 0.0117404  | 1.032990291 | 0.288257    | 0.390909091 | -1         |
| biological_process | peptidyl-serine phosphorylation                                                                | GO:0018105  | 16414 | 123  | 1.143848908 | 0.00277278 | 0.088288288 | 0.0117266  | 1.141213923 | 0.00323606  | 0.088288288 | 0.0565416  |
| biological_process | oligodendrocyte development                                                                    | GO:0014003  | 16504 | 33   | 1.278353088 | 0.00278249 | 0.014414414 | 0.0117133  | 1.114861303 | 0.126317    | 0.133333333 | 0.30236    |
| biological_process | dendritic spine morphogenesis                                                                  | GO:0060997  | 16515 | 22   | 1.340844821 | 0.00279503 | 0.106306306 | 0.0112855  | 1.426086805 | 0.000266208 | 0.082882883 | 0.0144854  |
| biological_process | positive regulation of mesenchymal cell proliferation                                          | GO:0002053  | 16505 | 32   | 1.282301079 | 0.00281421 | 0.001801802 | 0.0128409  | 1.272475191 | 0.00376657  | 0.050450405 | 0.0584958  |
| biological_process | receptor-mediated endocytosis                                                                  | GO:006698   | 16439 | 98   | 1.160983754 | 0.00281559 | 0.144144414 | 0.012826   | 1.175456346 | 0.00127469  | 0.01261622  | 0.0442631  |
| biological_process | apoptotic process                                                                              | GO:0006915  | 15291 | 1246 | 1.043468315 | 0.00286003 | 0.037837838 | 0.012813   | 1.039353065 | 0.00618027  | 0.118918919 | 0.0646297  |
| biological_process | membrane protein proteolysis                                                                   | GO:0033619  | 16501 | 36   | 1.26550385  | 0.00287042 | 0.03963964  | 0.0127986  | 1.037768316 | 0.347202    | 0.396396396 | -1         |
| biological_process | long-term memory                                                                               | GO:0007616  | 16512 | 25   | 1.318248411 | 0.00290583 | 0.156756757 | 0.0127852  | 1.125034565 | 0.139264    | 0.281081081 | 0.32688    |
| biological_process | protein deacetylation                                                                          | GO:006476   | 16482 | 55   | 1.214300574 | 0.00291362 | 0.007207207 | 0.0139156  | 1.127747005 | 0.0501229   | 0.063063063 | 0.183765   |
| biological_process | lipopolysaccharide metabolic process                                                           | GO:0008653  | 16491 | 46   | 1.233395432 | 0.00301987 | 0.027027027 | 0.0150458  | 1.235632711 | 0.0027862   | 0.034234234 | 0.0537361  |
| cellular_component | integrin complex                                                                               | GO:0008305  | 16793 | 30   | 1.288838067 | 0.00304718 | 0.104504050 | 0          | 1.237459057 | 0.0120733   | 0.030630631 | 0          |
| molecular_function | transmembrane transporter activity                                                             | GO:0022857  | 15993 | 868  | 1.052323214 | 0.00305764 | 0.194594595 | 0.0226847  | 1.014612623 | 0.221945    | 0.392792793 | 0.397454   |
| biological_process | lipid phosphorylation                                                                          | GO:0046834  | 16509 | 28   | 1.298793275 | 0.00306428 | 0.084684685 | 0.0173031  | 1.338769703 | 0.000943254 | 0.007207207 | 0.0374607  |
| biological_process | neuron migration                                                                               | GO:0001764  | 16441 | 96   | 1.160761142 | 0.00310797 | 0.100900901 | 0.0172858  | 1.125852784 | 0.0160964   | 0.201801802 | 0.109018   |
| biological_process | protein targeting                                                                              | GO:0006605  | 16207 | 330  | 1.086042363 | 0.00312204 | 0.043243243 | 0.0172667  | 1.050443788 | 0.0544519   | 0.172972973 | 0.129252   |
| biological_process | regulation of synaptic transmission, glutamatergic                                             | GO:0051966  | 16504 | 33   | 1.274376924 | 0.00314024 | 0.154954955 | 0.0172479  | 1.243040358 | 0.00774636  | 0.185585586 | 0.0770185  |
| biological_process | ERBB signaling pathway                                                                         | GO:0038127  | 16487 | 50   | 1.222647659 | 0.00315697 | 0.028828829 | 0.0172291  | 1.162969145 | 0.0228053   | 0.190990991 | 0.129033   |
| biological_process | regulation of protein autophosphorylation                                                      | GO:0031952  | 16513 | 24   | 1.32156684  | 0.00316104 | 0.005405405 | 0.0172096  | 1.194510548 | 0.0493009   | 0.088288288 | 0.183192   |
| biological_process | calcium ion homeostasis                                                                        | GO:0055074  | 16319 | 218  | 1.106052452 | 0.00316476 | 0.122522523 | 0.0171901  | 1.092522267 | 0.00861449  | 0.171171171 | 0.0778847  |
| biological_process | telencephalon cell migration                                                                   | GO:0022029  | 16498 | 39   | 1.251772413 | 0.00319979 | 0.111717112 | 0.0171724  | 1.217250405 | 0.00931861  | 0.167576576 | 0.0775181  |
| biological_process | ventricular septum morphogenesis                                                               | GO:0060412  | 16511 | 26   | 1.308473408 | 0.0032002  | 0.041441441 | 0.0171528  | 1.337092906 | 0.00144361  | 0.046846847 | 0.0432658  |
| molecular_function | syntaxin binding                                                                               | GO:00119905 | 16822 | 39   | 1.251529804 | 0.00322562 | 0.061261261 | 0.0225307  | 1.059357326 | 0.260181    | 0.347747748 | 0.449958   |
| biological_process | macromolecule localization                                                                     | GO:0033036  | 14877 | 1660 | 1.036608434 | 0.00322771 | 0.190990991 | 0.0171348  | 1.042320016 | 0.000820319 | 0.073873874 | 0.0345134  |
| biological_process | mammary gland morphogenesis                                                                    | GO:0060443  | 16483 | 54   | 1.213626519 | 0.00322982 | 0.046846847 | 0.0171154  | 1.188788018 | 0.115315315 | 0.0770068   | 0.0770068  |
| biological_process | glycogen biosynthetic process                                                                  | GO:0005978  | 16504 | 33   | 1.273398458 | 0.0032344  | 0.003603604 | 0.0170767  | 1.118111863 | 0.119727    | 0.142342342 | 0.293085   |
| biological_process | glucan biosynthetic process                                                                    | GO:0009250  | 16504 | 33   | 1.273398458 | 0.0032344  | 0.003603604 | 0.0170767  | 1.118111863 | 0.119727    | 0.142342342 | 0.293085   |
| biological_process | erythrocyte differentiation                                                                    | GO:0030218  | 16456 | 81   | 1.174221442 | 0.00323922 | 0.007207207 | 0.0170575  | 1.239230319 | 9.26E-05    | 0.003603604 | 0.00875338 |
| molecular_function | Ras GTPase binding                                                                             | GO:0017016  | 16746 | 115  | 1.14582386  | 0.00328412 | 0.209090909 | 0.0223683  | 1.215267418 | 3.01E-05    | 0.057657658 | 0          |
| cellular_component | Golgi membrane                                                                                 | GO:0000139  | 16390 | 433  | 1.074422469 | 0.00328863 | 0.214414414 | 0          | 1.088245794 | 0.000635738 | 0.086486486 | 0          |
| biological_process | hematopoietic progenitor cell differentiation                                                  | GO:0002244  | 16505 | 32   | 1.277048009 | 0.00329227 | 0.018018018 | 0.0170412  | 1.186657396 | 0.0335778   | 0.028828829 | 0.153007   |
| biological_process | monovalent inorganic cation homeostasis                                                        | GO:0055067  | 16475 | 62   | 1.198850031 | 0.00329318 | 0.003603604 | 0.0170219  | 0.96169649  | 0.699668    | 0.771171171 | -1         |
| biological_process |                                                                                                |             |       |      |             |            |             |            |             |             |             |            |

|                    |                                                                        |            |       |     |             |            |             |           |              |             |             |            |
|--------------------|------------------------------------------------------------------------|------------|-------|-----|-------------|------------|-------------|-----------|--------------|-------------|-------------|------------|
| molecular_function | ion gated channel activity                                             | GO:0022839 | 16589 | 272 | 1.093771413 | 0.00346128 | 0.223423423 | 0.0218951 | 1.168508775  | 6.08E-07    | 0.091891892 | 0          |
| biological_process | regulation of epithelial to mesenchymal transition                     | GO:0010717 | 16503 | 34  | 1.266975806 | 0.00347615 | 0.025225225 | 0.0191082 | 1.129295995  | 0.0955803   | 0.225225225 | 0.25599    |
| biological_process | positive regulation of glucose transport                               | GO:0010828 | 16514 | 23  | 1.324690092 | 0.00347763 | 0.005405405 | 0.0190868 | 1.16359022   | 0.0869441   | 0.117171717 | 0.246344   |
| biological_process | epidermal growth factor receptor signaling pathway                     | GO:0007173 | 16489 | 48  | 1.224252756 | 0.0035198  | 0.037837838 | 0.0190681 | 1.141438155  | 0.0445921   | 0.21981982  | 0.177363   |
| biological_process | pericardium development                                                | GO:0060039 | 16517 | 20  | 1.347301597 | 0.00355297 | 0.009090909 | 0.0201468 | 1.280437184  | 0.0148683   | 0.077477477 | 0.105865   |
| biological_process | regulation of amine transport                                          | GO:0051952 | 16480 | 57  | 1.205442611 | 0.00356012 | 0.147747748 | 0.0201247 | 0.997618579  | 0.512466    | 0.486486486 | -1         |
| biological_process | T cell mediated cytotoxicity                                           | GO:0001913 | 16515 | 22  | 1.33099693  | 0.00356332 | 0.014414414 | 0.0201024 | 1.071563264  | 0.280372    | 0.389189189 | 0.498271   |
| biological_process | establishment of protein localization to membrane                      | GO:0090150 | 16492 | 45  | 1.23111089  | 0.00358391 | 0.03963964  | 0.0200814 | 1.150826833  | 0.039644    | 0.165765766 | 0.164976   |
| molecular_function | monocarboxylic acid transmembrane transporter activity                 | GO:0008028 | 16830 | 31  | 1.278515976 | 0.00358937 | 0.036036036 | 0.027887  | 0.955047462  | 0.667835    | 0.616216216 | -1         |
| biological_process | regulation of alpha-beta T cell activation                             | GO:0046634 | 16481 | 56  | 1.206839338 | 0.00362096 | 0.010810811 | 0.0200615 | 1.152602595  | 0.0237783   | 0.147747748 | 0.132219   |
| biological_process | neural crest cell differentiation                                      | GO:0014033 | 16484 | 53  | 1.212507183 | 0.00363807 | 0.036036036 | 0.0200403 | 1.165206013  | 0.018466    | 0.07027027  | 0.115443   |
| biological_process | negative regulation of osteoblast differentiation                      | GO:0045668 | 16503 | 34  | 1.265407221 | 0.00364539 | 0.016216216 | 0.0200185 | 0.991907848  | 0.53263     | 0.517171717 | -1         |
| biological_process | regulation of alpha-beta T cell differentiation                        | GO:0046637 | 16498 | 39  | 1.247694767 | 0.00365466 | 0.001801802 | 0.0199968 | 1.207110554  | 0.0124517   | 0.07027027  | 0.0956423  |
| biological_process | regulation of organ morphogenesis                                      | GO:2000027 | 16412 | 125 | 1.137930968 | 0.00366741 | 0.016216216 | 0.0199755 | 1.149395512  | 0.00184162  | 0.095495495 | 0.0479839  |
| molecular_function | microtubule motor activity                                             | GO:0003777 | 16796 | 65  | 1.191491872 | 0.00368921 | 0.124324324 | 0.0285947 | 0.947443651  | 0.768943    | 0.654054054 | -1         |
| biological_process | phosphatidylinositol phosphorylation                                   | GO:0046854 | 16511 | 26  | 1.302919746 | 0.00370933 | 0.081081081 | 0.0210415 | 1.360856439  | 0.000712492 | 0.003603604 | 0.0311279  |
| biological_process | glycosphingolipid metabolic process                                    | GO:0006687 | 16508 | 29  | 1.286792058 | 0.00370993 | 0.003603604 | 0.0210182 | 1.037392772  | 0.363529    | 0.21981982  | -1         |
| biological_process | outflow tract morphogenesis                                            | GO:0003151 | 16489 | 48  | 1.22269825  | 0.00372219 | 0.068468468 | 0.0209958 | 1.254740723  | 0.00110166  | 0.059459459 | 0.0405619  |
| biological_process | purine ribonucleotide metabolic process                                | GO:0009150 | 15829 | 708 | 1.056797544 | 0.00373181 | 0.133333333 | 0.0209733 | 1.053379621  | 0.00596116  | 0.088288288 | 0.0653348  |
| biological_process | leukocyte cell-cell adhesion                                           | GO:0007159 | 16505 | 32  | 1.272652813 | 0.00374706 | 0.023423423 | 0.0209512 | 1.262033296  | 0.00508643  | 0.025225225 | 0.060656   |
| biological_process | regulation of amino acid transport                                     | GO:0051955 | 16516 | 21  | 1.336585692 | 0.00375556 | 0.066666667 | 0.0209287 | 0.959121859  | 0.627305    | 0.632432432 | -1         |
| biological_process | pancreas development                                                   | GO:0031016 | 16466 | 71  | 1.182736302 | 0.00376214 | 0.016216216 | 0.0209062 | 1.185436026  | 0.00334201  | 0.009009009 | 0.0563105  |
| biological_process | stress fiber assembly                                                  | GO:0043149 | 16492 | 45  | 1.229651619 | 0.00377041 | 0.041441441 | 0.0208838 | 1.120456272  | 0.0805372   | 0.145945946 | 0.238498   |
| cellular_component | contractile fiber part                                                 | GO:0044449 | 16686 | 137 | 1.13119657  | 0.00378383 | 0.030630631 | 0         | 1.162000687  | 0.000487132 | 0.023423423 | 0          |
| molecular_function | chromatin binding                                                      | GO:0003682 | 16537 | 324 | 1.084816285 | 0.00379072 | 0.176576577 | 0.0284035 | 1.1642421616 | 1.58E-07    | 0.02072027  | 0          |
| molecular_function | ARF GTPase activator activity                                          | GO:0008060 | 16838 | 23  | 1.321206747 | 0.00379238 | 0.048648649 | 0.0282034 | 1.399592465  | 0.000447514 | 0.007207207 | 0          |
| cellular_component | filopodium                                                             | GO:0030175 | 16760 | 63  | 1.193828053 | 0.00379532 | 0.095495495 | 0         | 1.24648717   | 0.000343043 | 0.057657658 | 0          |
| biological_process | morphogenesis of a polarized epithelium                                | GO:0001738 | 16496 | 41  | 1.240266741 | 0.00381504 | 0.059459459 | 0.0208639 | 1.261834289  | 0.00182157  | 0.046846847 | 0.044937   |
| biological_process | regulation of ARF GTPase activity                                      | GO:0032312 | 16514 | 23  | 1.32077814  | 0.00383273 | 0.05045045  | 0.0208422 | 1.400904808  | 0.00043031  | 0.007207207 | 0.018111   |
| biological_process | inflammatory response                                                  | GO:0006954 | 16182 | 355 | 1.08078212  | 0.00385007 | 0.009090909 | 0.0208205 | 1.003374135  | 0.455717    | 0.479279279 | -1         |
| biological_process | lymph vessel development                                               | GO:0001945 | 16515 | 22  | 1.327437637 | 0.00388494 | 0.061261261 | 0.0208001 | 1.279998523  | 0.0114157   | 0.144144144 | 0.0889051  |
| biological_process | regulation of canonical Wnt receptor signaling pathway                 | GO:0060828 | 16419 | 118 | 1.140930377 | 0.00389474 | 0.059459459 | 0.020778  | 1.188135635  | 0.000190815 | 0.057657658 | 0.0129389  |
| biological_process | cardiac cell development                                               | GO:0055006 | 16501 | 36  | 1.255735069 | 0.00390015 | 0.018018018 | 0.0207557 | 1.151678074  | 0.0572835   | 0.07027027  | 0.198642   |
| biological_process | development of primary female sexual characteristics                   | GO:0046545 | 16423 | 114 | 1.143293139 | 0.00391683 | 0.059459459 | 0.0207341 | 1.119700399  | 0.0131644   | 0.075675676 | 0.0986474  |
| biological_process | activation of immune response                                          | GO:0002253 | 16367 | 170 | 1.117067433 | 0.00393629 | 0.009090909 | 0.0207128 | 0.970082816  | 0.751523    | 0.735135135 | -1         |
| biological_process | gastrulation                                                           | GO:0007369 | 16409 | 128 | 1.135079041 | 0.00393804 | 0.023423423 | 0.0206904 | 1.109767931  | 0.0154111   | 0.172972973 | 0.106083   |
| biological_process | regulation of leukocyte differentiation                                | GO:1902105 | 16382 | 155 | 1.122579683 | 0.00395712 | 0.064864865 | 0.0206692 | 1.077568825  | 0.0464308   | 0.077477477 | 0.179612   |
| biological_process | regulation of proteolysis                                              | GO:0031062 | 16391 | 146 | 1.126127543 | 0.00400842 | 0.028828829 | 0.0206501 | 1.01619356   | 0.366779    | 0.38018018  | -1         |
| biological_process | cardiac muscle cell development                                        | GO:0050313 | 16506 | 31  | 1.274652247 | 0.0041083  | 0.005405405 | 0.0206279 | 1.136963027  | 0.0930761   | 0.088288288 | 0.254011   |
| biological_process | inner ear morphogenesis                                                | GO:0042472 | 16454 | 83  | 1.167577051 | 0.00401281 | 0.057657658 | 0.0206506 | 1.173617923  | 0.00301123  | 0.10990991  | 0.0571823  |
| biological_process | GTP metabolic process                                                  | GO:0046039 | 16093 | 444 | 1.071652355 | 0.00401414 | 0.100900901 | 0.0205834 | 1.066692426  | 0.00680552  | 0.09009009  | 0.0706374  |
| biological_process | cellular cation homeostasis                                            | GO:0030003 | 16247 | 290 | 1.089048274 | 0.00402637 | 0.081081081 | 0.0205619 | 1.034231807  | 0.154213    | 0.268468468 | 0.345144   |
| biological_process | regulation of morphogenesis of a branching structure                   | GO:0060688 | 16489 | 48  | 1.220405542 | 0.00403975 | 0.003603604 | 0.0205406 | 1.09466765   | 0.141157    | 0.136936937 | 0.330754   |
| biological_process | neuropeptide signaling pathway                                         | GO:0007218 | 16466 | 71  | 1.181021083 | 0.00405308 | 0.052252252 | 0.0205193 | 1.124429077  | 0.0343885   | 0.140540541 | 0.153434   |
| biological_process | peptidyl-threonine phosphorylation                                     | GO:0018107 | 16483 | 54  | 1.207508154 | 0.00407869 | 0.120720721 | 0.0204988 | 1.286979714  | 0.000126761 | 0.05045045  | 0.00820516 |
| biological_process | positive regulation of behavior                                        | GO:0048520 | 16461 | 76  | 1.147479114 | 0.00407978 | 0.016216216 | 0.0204768 | 1.172038304  | 0.00461108  | 0.086486486 | 0.0592858  |
| biological_process | transforming growth factor beta receptor signaling pathway             | GO:0007179 | 16425 | 112 | 1.143765774 | 0.00409277 | 0.140540541 | 0.0204556 | 1.23084758   | 1.13E-05    | 0.068468468 | 0          |
| molecular_function | collagen binding                                                       | GO:0005518 | 16826 | 35  | 1.257584213 | 0.00411787 | 0.068468468 | 0.0280425 | 1.257343604  | 0.00414798  | 0.063063063 | 0          |
| biological_process | immune response-regulating signaling pathway                           | GO:0002764 | 16399 | 138 | 1.129313315 | 0.00411895 | 0.007207207 | 0.0204353 | 1.053194997  | 0.318539    | 0.198198198 | 0.326122   |
| biological_process | monosaccharide transport                                               | GO:0015749 | 16471 | 66  | 1.187167014 | 0.00415809 | 0.01981982  | 0.0204159 | 1.106886988  | 0.0659022   | 0.084684685 | 0.218261   |
| biological_process | response to alkaloid                                                   | GO:0043279 | 16429 | 108 | 1.146073678 | 0.00416988 | 0.140540541 | 0.0203948 | 1.114678986  | 0.0191803   | 0.136936937 | 0.11981    |
| biological_process | cellular response to organic cyclic compound                           | GO:0071407 | 16314 | 223 | 1.101231585 | 0.0041922  | 0.007207207 | 0.0203744 | 1.028644065  | 0.22787     | 0.376576577 | 0.425891   |
| biological_process | regulation of systemic arterial blood pressure by renin-angiotensin    | GO:0003081 | 16515 | 22  | 1.324177915 | 0.0042018  | 0.018018018 | 0.0203531 | 1.050328351  | 0.341232    | 0.295495495 | -1         |
| biological_process | positive regulation of developmental growth                            | GO:0048639 | 16497 | 40  | 1.240154066 | 0.00421975 | 0.081081081 | 0.0203325 | 1.1262433    | 0.0830895   | 0.227027027 | 0.243256   |
| biological_process | hexose transport                                                       | GO:0008645 | 16473 | 64  | 1.189546585 | 0.0042499  | 0.023423423 | 0.020291  | 1.117989554  | 0.0507036   | 0.068468468 | 0.184634   |
| biological_process | glucose transport                                                      | GO:0015758 | 16473 | 64  | 1.189546585 | 0.0042499  | 0.023423423 | 0.020291  | 1.117989554  | 0.0507036   | 0.068468468 | 0.184634   |
| biological_process | gene silencing                                                         | GO:0016458 | 16451 | 86  | 1.163243131 | 0.00428278 | 0.088288288 | 0.0202715 | 1.174972323  | 0.00241755  | 0.052252252 | 0.0503396  |
| biological_process | male gonad development                                                 | GO:0008584 | 16449 | 88  | 1.161256444 | 0.00430565 | 0.009090909 | 0.0202514 | 1.035983929  | 0.278877    | 0.255855856 | 0.496445   |
| cellular_component | calcium channel complex                                                | GO:0034704 | 16792 | 31  | 1.272050596 | 0.00431193 | 0.030630631 | 0         | 1.302851466  | 0.00173143  | 0.052252252 | 0          |
| biological_process | central nervous system neuron axonogenesis                             | GO:0021955 | 16508 | 29  | 1.281254114 | 0.00432371 | 0.034234234 | 0.020231  | 1.083026594  | 0.219149    | 0.363963964 | 0.418062   |
| biological_process | muscle hypertrophy                                                     | GO:0014896 | 16511 | 26  | 1.296947467 | 0.00433685 | 0.005405405 | 0.0202103 | 1.042958142  | 0.352101    | 0.354954955 | 0          |
| biological_process | bone development                                                       | GO:0060348 | 16443 | 94  | 1.155799765 | 0.00434767 | 0.064864865 | 0.0201895 | 1.149386403  | 0.00593837  | 0.127927928 | 0.0655861  |
| molecular_function | Rho GTPase activator activity                                          | GO:0005100 | 16834 | 27  | 1.291117824 | 0.00436806 | 0.068468468 | 0.0278751 | 1.374658778  | 0.000369475 | 0.009009009 | 0          |
| biological_process | transmembrane transport                                                | GO:0055085 | 15857 | 680 | 1.056785386 | 0.00440739 | 0.192792793 | 0.0201719 | 1.052872816  | 0.00737116  | 0.194594595 | 0.0748036  |
| biological_process | energy reserve metabolic process                                       | GO:0006112 | 16472 | 65  | 1.187170086 | 0.00441132 | 0.012612613 | 0.0201507 | 1.095706766  | 0.0902718   | 0.028828829 | 0.250948   |
| molecular_function | potassium ion transmembrane transporter activity                       | GO:0015079 | 16742 | 119 | 1.138007823 | 0.00443631 | 0.118918919 | 0.0276897 | 1.142383435  | 0.00346768  | 0.158558559 | 0          |
| biological_process | toll-like receptor signaling pathway                                   | GO:0002224 | 16492 | 45  | 1.224851883 | 0.00444675 | 0.007207207 | 0.0201316 | 1.035485351  | 0.339869    | 0.394594595 | -1         |
| biological_process | positive regulation of pathway-restricted SMAD protein phosphorylation | GO:0010862 | 16515 | 22  | 1.321528361 | 0.00447617 | 0.084684685 | 0.0201122 | 1.047568857  | 0.3495      | 0.401801802 | -1         |
| biological_process | epithelial tube branching involved in lung morphogenesis               | GO:0060441 | 16515 | 22  | 1.321324972 | 0.00449788 | 0.007207207 | 0.0200923 | 1.265063173  | 0.0155877   | 0.052252252 | 0.107389   |
| cellular_component | Z disc                                                                 | GO:0030018 | 16747 | 76  | 1.172309299 | 0.00455676 | 0.059459459 | 0         | 1.220985089  | 0.000412259 | 0.003603604 | 0          |
| biological_process | regulation of leukocyte proliferation                                  | GO:0070663 | 16405 | 132 | 1.130503934 | 0.0045614  | 0.025225225 | 0.0200751 | 1.016377045  | 0.371788    | 0.423423423 | -1         |
| biological_process | regulation of cellular component size                                  | GO:0032535 | 16367 | 170 | 1.114805255 | 0.00457898 | 0.07027027  | 0.0200055 | 1.127538895  | 0.00189519  | 0.0144      |            |

|                    |                                                                       |            |       |      |             |            |             |           |             |             |             |            |
|--------------------|-----------------------------------------------------------------------|------------|-------|------|-------------|------------|-------------|-----------|-------------|-------------|-------------|------------|
| biological_process | epidermis development                                                 | GO:0008544 | 16326 | 211  | 1.102224646 | 0.00481942 | 0.037837838 | 0.0209494 | 1.134515745 | 0.000329502 | 0.113513514 | 0.0141837  |
| biological_process | leukocyte chemotaxis                                                  | GO:0030595 | 16439 | 98   | 1.150487175 | 0.00482661 | 0.032432432 | 0.0209279 | 1.191424571 | 0.000497303 | 0.005405405 | 0.0219081  |
| biological_process | regulation of gliogenesis                                             | GO:0014013 | 16472 | 65   | 1.184825827 | 0.00485415 | 0.034234234 | 0.0209079 | 1.091040574 | 0.101368    | 0.097297297 | 0.262997   |
| biological_process | heart looping                                                         | GO:0001947 | 16503 | 34   | 1.255640021 | 0.00487582 | 0.063063063 | 0.0208874 | 1.133092498 | 0.000410437 | 0.007207207 | 0.0181909  |
| biological_process | response to organophosphorus                                          | GO:0046683 | 16446 | 91   | 1.155952367 | 0.00488481 | 0.034234234 | 0.0208662 | 1.063419246 | 0.146695    | 0.261261261 | 0.336812   |
| biological_process | response to osmotic stress                                            | GO:0006970 | 16484 | 53   | 1.204345278 | 0.0049279  | 0.01981982  | 0.0208472 | 1.040155685 | 0.306037    | 0.302702703 | -1         |
| biological_process | regulation of production of molecular mediator of immune response     | GO:0002700 | 16485 | 52   | 1.206112073 | 0.00496282 | 0.046846847 | 0.0208278 | 0.973342015 | 0.63064     | 0.668468468 | -1         |
| biological_process | epithelial cell differentiation involved in kidney development        | GO:0035850 | 16512 | 25   | 1.297225243 | 0.00499733 | 0.032432432 | 0.0208083 | 1.1528252   | 0.0926698   | 0.246846847 | 0.253681   |
| biological_process | coronary vasculature development                                      | GO:0060976 | 16509 | 28   | 1.280583169 | 0.00502962 | 0.010810811 | 0.0207888 | 1.222128852 | 0.0207962   | 0.012612613 | 0.126018   |
| molecular_function | hyaluronic acid binding                                               | GO:0005540 | 16841 | 20   | 1.332013663 | 0.00503611 | 0.03963964  | 0.0402376 | 0.991371765 | 0.526671    | 0.533333333 | -1         |
| biological_process | response to carbohydrate stimulus                                     | GO:0009743 | 16382 | 155  | 1.118725399 | 0.00505224 | 0.059459459 | 0.0207687 | 1.127705724 | 0.000282972 | 0.016216216 | 0.0535777  |
| biological_process | positive regulation of protein complex assembly                       | GO:0031334 | 16449 | 88   | 1.15788266  | 0.00505351 | 0.018018018 | 0.0207472 | 1.020957878 | 0.366413    | 0.354954955 | -1         |
| biological_process | regulation of nucleobase-containing compound metabolic process        | GO:0019219 | 13489 | 3048 | 1.024292797 | 0.00505893 | 0.335135135 | 0.020726  | 1.065556369 | 1.95E-12    | 0.12972973  | 0          |
| biological_process | muscle organ morphogenesis                                            | GO:0048644 | 16476 | 61   | 1.189730929 | 0.00506456 | 0.01981982  | 0.0207049 | 1.150504695 | 0.0206875   | 0.028828829 | 0.126331   |
| biological_process | regulation of embryonic development                                   | GO:0045995 | 16460 | 77   | 1.168357587 | 0.00516179 | 0.012612613 | 0.0206897 | 1.039647679 | 0.272937    | 0.324324324 | 0.489284   |
| biological_process | positive regulation of cell morphogenesis involved in differentiation | GO:0010770 | 16505 | 32   | 1.261481534 | 0.00516644 | 0.009090909 | 0.0206473 | 1.113919369 | 0.131946    | 0.266666667 | 0.311993   |
| biological_process | embryonic digestive tract development                                 | GO:0048566 | 16505 | 32   | 1.261481534 | 0.00516644 | 0.023423423 | 0.0206473 | 1.105238575 | 0.151013    | 0.252252252 | 0.341619   |
| biological_process | endochondral ossification                                             | GO:0001958 | 16515 | 22   | 1.315305757 | 0.0051844  | 0.064864865 | 0.0206059 | 0.963805565 | 0.615735    | 0.551351351 | -1         |
| biological_process | replacement ossification                                              | GO:0036075 | 16515 | 22   | 1.315305757 | 0.0051844  | 0.064864865 | 0.0206059 | 0.963805565 | 0.615735    | 0.551351351 | -1         |
| biological_process | negative regulation of protein depolymerization                       | GO:1901880 | 16500 | 37   | 1.24281919  | 0.00521643 | 0.025225225 | 0.0205867 | 1.247153203 | 0.00456888  | 0.037837838 | 0.058218   |
| biological_process | smooth muscle cell differentiation                                    | GO:0051145 | 16488 | 49   | 1.210697503 | 0.00525808 | 0.05045045  | 0.0205681 | 1.153157596 | 0.0314648   | 0.154954955 | 0.148574   |
| biological_process | hexose metabolic process                                              | GO:0019318 | 16338 | 199  | 1.103951258 | 0.00530522 | 0.043243243 | 0.0215553 | 1.007118973 | 0.430591    | 0.45045045  | -1         |
| biological_process | cellular response to lipid                                            | GO:0071396 | 16286 | 251  | 1.092376177 | 0.00531931 | 0.066666667 | 0.0215341 | 1.041733254 | 0.124269    | 0.277477477 | 0.300586   |
| biological_process | neuron recognition                                                    | GO:0008038 | 16516 | 21   | 1.321549564 | 0.00532677 | 0.054054054 | 0.0215126 | 1.351581509 | 0.002616    | 0.086486486 | 0.0527808  |
| biological_process | bone remodeling                                                       | GO:0046849 | 16479 | 58   | 1.192888885 | 0.00540372 | 0.021621622 | 0.0214956 | 1.171270889 | 0.0118119   | 0.034234234 | 0.0900308  |
| molecular_function | ephrin receptor binding                                               | GO:0046875 | 16832 | 29   | 1.272648147 | 0.00545871 | 0.068486486 | 0.0463969 | 1.213105943 | 0.023325    | 0.158585859 | 0.0501017  |
| biological_process | regulation of protein import into nucleus                             | GO:0042306 | 16419 | 118  | 1.13478119  | 0.00546321 | 0.010810811 | 0.0214775 | 1.028769209 | 0.293505    | 0.369369369 | -1         |
| biological_process | filopodium assembly                                                   | GO:0046847 | 16489 | 48   | 1.211698294 | 0.00547817 | 0.05045045  | 0.0214565 | 1.312151624 | 8.80E-05    | 0.009009009 | 0.00588688 |
| biological_process | negative regulation of glial cell differentiation                     | GO:0045686 | 16513 | 24   | 1.299481267 | 0.00549451 | 0.014414414 | 0.0214357 | 1.044547339 | 0.352629    | 0.354954955 | -1         |
| biological_process | ovulation cycle process                                               | GO:0022602 | 16440 | 97   | 1.148637442 | 0.00549471 | 0.072072072 | 0.0214138 | 1.003731072 | 0.474577    | 0.479279279 | -1         |
| biological_process | sphingolipid biosynthetic process                                     | GO:0030148 | 16497 | 40   | 1.231758222 | 0.00551297 | 0.032432432 | 0.0213932 | 1.00376436  | 0.483554    | 0.468468468 | -1         |
| biological_process | cytokine production                                                   | GO:0001816 | 16193 | 344  | 1.078263787 | 0.00553168 | 0.030630631 | 0.0213726 | 1.005190116 | 0.433132    | 0.452252252 | -1         |
| biological_process | positive regulation of nucleocytoplasmic transport                    | GO:0046824 | 16468 | 69   | 1.176183131 | 0.0055403  | 0.032432432 | 0.0213514 | 1.006142905 | 0.464736    | 0.466666667 | -1         |
| biological_process | positive regulation of intracellular transport                        | GO:0032388 | 16416 | 121  | 1.132791852 | 0.00555239 | 0.018018018 | 0.0213305 | 1.05478442  | 0.147403    | 0.273873874 | 0.337521   |
| biological_process | substrate adhesion-dependent cell spreading                           | GO:0034446 | 16506 | 31   | 1.26299967  | 0.00556366 | 0.016216216 | 0.0213096 | 1.082780691 | 0.212137    | 0.302702703 | 0.41016    |
| biological_process | cellular response to nutrient levels                                  | GO:0031669 | 16414 | 123  | 1.131539202 | 0.00560296 | 0.066666667 | 0.0212905 | 1.087953799 | 0.044952    | 0.124324324 | 0.177194   |
| biological_process | protein localization                                                  | GO:0008104 | 15085 | 1452 | 1.03665931  | 0.0056539  | 0.172972973 | 0.0212722 | 1.035276731 | 0.00738809  | 0.12972973  | 0.0757717  |
| biological_process | establishment of vesicle localization                                 | GO:0051650 | 16457 | 80   | 1.162995145 | 0.00568292 | 0.084684685 | 0.0222421 | 1.102567445 | 0.055602    | 0.196396396 | 0.195268   |
| biological_process | regulation of protein localization to nucleus                         | GO:1900180 | 16416 | 121  | 1.132362087 | 0.00568513 | 0.009090909 | 0.0221198 | 1.025880192 | 0.310337    | 0.392792793 | -1         |
| biological_process | regulation of nitrogen compound metabolic process                     | GO:0051171 | 13454 | 3083 | 1.023737955 | 0.00568882 | 0.342342342 | 0.0221976 | 1.063677951 | 5.64E-12    | 0.133333333 | 0          |
| biological_process | ear morphogenesis                                                     | GO:0042471 | 16438 | 99   | 1.146395762 | 0.0056946  | 0.068486486 | 0.0221756 | 1.15607659  | 0.00348926  | 0.113513514 | 0.0568323  |
| cellular_component | l band                                                                | GO:0031674 | 16737 | 86   | 1.157063068 | 0.00571397 | 0.075675676 | 0         | 1.23887868  | 5.98E-05    | 0.001801802 | 0          |
| biological_process | protein targeting to membrane                                         | GO:0006612 | 16479 | 58   | 1.191170789 | 0.00576584 | 0.027027027 | 0.0221158 | 1.108112061 | 0.0765619   | 0.153151513 | 0.231972   |
| biological_process | positive regulation of muscle contraction                             | GO:0045933 | 16511 | 26   | 1.285635486 | 0.00579038 | 0.072072072 | 0.0221373 | 0.926554508 | 0.741905    | 0.603603604 | -1         |
| biological_process | regulation of glucose transport                                       | GO:0010827 | 16494 | 43   | 1.221936905 | 0.00580112 | 0.059459459 | 0.0221158 | 1.087402039 | 0.160121    | 0.203603604 | 0.351106   |
| biological_process | cell fate commitment                                                  | GO:0045165 | 16361 | 176  | 1.109253447 | 0.00580194 | 0.054054054 | 0.0220936 | 1.102478394 | 0.00895829  | 0.117117117 | 0.0770681  |
| biological_process | kidney epithelium development                                         | GO:0072073 | 16481 | 56   | 1.194318349 | 0.00581891 | 0.061261261 | 0.0230527 | 1.111020732 | 0.0747334   | 0.25045045  | 0.228835   |
| biological_process | somite development                                                    | GO:0061053 | 16470 | 67   | 1.177583171 | 0.00582123 | 0.055855856 | 0.0230298 | 1.12708871  | 0.0355027   | 0.151351351 | 0.157496   |
| biological_process | response to mechanical stimulus                                       | GO:0009612 | 16399 | 138  | 1.123371775 | 0.00585483 | 0.084684685 | 0.0230091 | 1.115660041 | 0.09006109  | 0.147747748 | 0.0779905  |
| biological_process | endocrine system development                                          | GO:0035270 | 16428 | 109  | 1.138765656 | 0.00590842 | 0.007207207 | 0.0229897 | 1.076136264 | 0.0835919   | 0.115315315 | 0.243834   |
| biological_process | carbohydrate derivative biosynthetic process                          | GO:1901137 | 15991 | 546  | 1.061038662 | 0.00600016 | 0.073873874 | 0.0239479 | 1.052650804 | 0.0151221   | 0.052252252 | 0.105626   |
| biological_process | regulation of phosphatidylinositol 3-kinase activity                  | GO:0043551 | 16513 | 24   | 1.295757507 | 0.00601221 | 0.016216216 | 0.0239249 | 1.21711513  | 0.0326192   | 0.16036036  | 0.151209   |
| biological_process | negative regulation of synaptic transmission                          | GO:0050805 | 16502 | 35   | 1.24463899  | 0.00604551 | 0.097297297 | 0.0239035 | 0.983818887 | 0.565937    | 0.522525252 | -1         |
| molecular_function | carbohydrate binding                                                  | GO:0030246 | 16627 | 234  | 1.094024891 | 0.00605801 | 0.084684685 | 0.0461959 | 0.993170936 | 0.572328    | 0.511717172 | -1         |
| molecular_function | calcium channel activity                                              | GO:0005262 | 16779 | 82   | 1.159286595 | 0.0061319  | 0.18018018  | 0.0459057 | 1.295118152 | 1.74E-06    | 0.032432432 | 0          |
| molecular_function | structural constituent of cytoskeleton                                | GO:0005200 | 16832 | 29   | 1.267400678 | 0.00627407 | 0.007207207 | 0.0456309 | 1.139175123 | 0.0969257   | 0.181981982 | 0.179134   |
| cellular_component | sarcomere                                                             | GO:0030017 | 16699 | 124  | 1.128879474 | 0.00629716 | 0.023423423 | 0         | 1.153652085 | 0.0014668   | 0.007207207 | 0          |
| biological_process | regulation of microtubule polymerization or depolymerization          | GO:0031110 | 16495 | 42   | 1.221658073 | 0.0063641  | 0.055855856 | 0.0248733 | 1.240119032 | 0.0033754   | 0.036036036 | 0.0575782  |
| biological_process | cellular response to starvation                                       | GO:0009267 | 16442 | 95   | 1.147050156 | 0.00639338 | 0.064864865 | 0.0248508 | 1.073289322 | 0.107339    | 0.205405405 | 0.271976   |
| cellular_component | coated pit                                                            | GO:0005905 | 16777 | 46   | 1.211502336 | 0.00642238 | 0.093693694 | 0         | 1.212975387 | 0.00611611  | 0.037837838 | 0          |
| biological_process | metanephros development                                               | GO:0001656 | 16466 | 71   | 1.169913891 | 0.00647469 | 0.028828829 | 0.024832  | 1.126364022 | 0.032288    | 0.140540541 | 0.149623   |
| biological_process | production of molecular mediator of immune response                   | GO:0002440 | 16451 | 86   | 1.154288389 | 0.00648285 | 0.025225225 | 0.024808  | 0.991199036 | 0.556382    | 0.6         | -1         |
| biological_process | intracellular protein transport                                       | GO:0006886 | 15900 | 637  | 1.05566656  | 0.00653934 | 0.154954955 | 0.0247875 | 1.034883756 | 0.0599676   | 0.176576577 | 0.204677   |
| biological_process | erythrocyte homeostasis                                               | GO:0034101 | 16451 | 86   | 1.153918556 | 0.00659211 | 0.010810811 | 0.025732  | 1.208215113 | 0.000399435 | 0.007207207 | 0.0183145  |
| biological_process | negative regulation of muscle cell differentiation                    | GO:0051148 | 16505 | 32   | 1.252634456 | 0.00661132 | 0.005405405 | 0.0266704 | 1.145022084 | 0.0774718   | 0.064864865 | 0.234041   |
| biological_process | adult walking behavior                                                | GO:0007628 | 16503 | 34   | 1.244997829 | 0.00662609 | 0.104504505 | 0.0266452 | 1.266648573 | 0.00351086  | 0.081081081 | 0.0580729  |
| biological_process | positive regulation of phosphatidylinositol 3-kinase cascade          | GO:0014068 | 16500 | 37   | 1.234713343 | 0.00664981 | 0.055855856 | 0.0266208 | 1.173654743 | 0.0335045   | 0.2         | 0.153104   |
| biological_process | regulation of lymphocyte activation                                   | GO:0051249 | 16315 | 222  | 1.095204525 | 0.00668713 | 0.046846847 | 0.0265975 | 1.074106443 | 0.0270912   | 0.104504505 | 0.139714   |
| biological_process | embryonic heart tube morphogenesis                                    | GO:0003143 | 16497 | 40   | 1.225502911 | 0.0066942  | 0.059459459 | 0.0265719 | 1.33890273  | 0.000100786 | 0.012612613 | 0.00860337 |
| biological_process | ribonucleotide metabolic process                                      | GO:0009259 | 15817 | 720  | 1.052021733 | 0.00671705 | 0.154954955 | 0.0275037 | 1.051314605 | 0.086486486 | 0.00737507  | 0.0747116  |
| biological_process | neutral amino acid transport                                          | GO:0015804 | 16516 | 21   | 1.311011029 | 0.00675264 | 0.086486486 | 0.0284331 | 1.225931075 | 0.0363738   | 0.183783784 | 0.158027   |
| biological_process | regulation of homeostatic process                                     | GO:0032844 | 16301 | 236  | 1.092131455 | 0.00677219 | 0.122522523 | 0.0284069 | 1.098541982 | 0.00413374  | 0.127927928 | 0.0585114  |
|                    |                                                                       |            |       |      |             |            |             |           |             |             |             |            |

|                    |                                                                         |            |       |      |              |             |             |           |             |             |             |            |
|--------------------|-------------------------------------------------------------------------|------------|-------|------|--------------|-------------|-------------|-----------|-------------|-------------|-------------|------------|
| cellular_component | internal side of plasma membrane                                        | GO:0009898 | 16730 | 93   | 1.146533475  | 0.00705527  | 0.007207207 | 0         | 1.002057252 | 0.486263    | 0.491891892 | -1         |
| biological_process | regulation of skeletal muscle fiber development                         | GO:0048742 | 16491 | 46   | 1.208567155  | 0.00707297  | 0.046846847 | 0.0282105 | 1.219514311 | 0.00490695  | 0.054054054 | 0.0611894  |
| biological_process | positive regulation of endothelial cell proliferation                   | GO:0001938 | 16492 | 45   | 1.210826225  | 0.00708488  | 0.037837838 | 0.028184  | 1.248901626 | 0.00189011  | 0.055855856 | 0.0477502  |
| biological_process | chromatin organization                                                  | GO:0006325 | 16035 | 502  | 1.062239037  | 0.0070871   | 0.21981982  | 0.0281569 | 1.098685463 | 5.03E-05    | 0.021621622 | 0.00318623 |
| molecular_function | ion channel binding                                                     | GO:0044325 | 16819 | 42   | 1.218014233  | 0.00713676  | 0.209090909 | 0.0569943 | 1.338281917 | 7.18E-05    | 0.016216216 | 0          |
| biological_process | regulation of mononuclear cell proliferation                            | GO:0032944 | 16409 | 128  | 1.12452566   | 0.00714795  | 0.027027027 | 0.0290764 | 1.015477197 | 0.380417    | 0.427027027 | -1         |
| biological_process | endocardial cushion development                                         | GO:0003197 | 16512 | 25   | 1.282297149  | 0.00720991  | 0.032432432 | 0.0290535 | 1.115567851 | 0.158273    | 0.245045045 | 0.348674   |
| biological_process | positive regulation of lipid kinase activity                            | GO:0090218 | 16516 | 21   | 1.307907056  | 0.00723244  | 0.018018018 | 0.0299658 | 1.214885769 | 0.0439404   | 0.171171171 | 0.175053   |
| biological_process | response to molecule of bacterial origin                                | GO:0002237 | 16308 | 229  | 1.092604437  | 0.0072591   | 0.023424243 | 0.0299392 | 1.048244364 | 0.101455    | 0.198198198 | 0.262882   |
| cellular_component | ionotropic glutamate receptor complex                                   | GO:0008328 | 16794 | 29   | 1.261777778  | 0.00726563  | 0.156756757 | 0         | 1.2686399   | 0.00607225  | 0.127927928 | 0          |
| biological_process | anatomical structure homeostasis                                        | GO:0060249 | 16386 | 151  | 1.114122569  | 0.00734201  | 0.021621622 | 0.0308527 | 1.079836577 | 0.0439187   | 0.18018018  | 0.175175   |
| molecular_function | metal ion binding                                                       | GO:0046872 | 13368 | 3493 | 1.021224014  | 0.00734232  | 0.336936937 | 0.0566776 | 1.037489166 | 8.17E-06    | 0.234234234 | 0          |
| biological_process | ribose phosphate metabolic process                                      | GO:0019693 | 15812 | 725  | 1.051160066  | 0.00734557  | 0.151351351 | 0.0308233 | 1.051203436 | 0.00730369  | 0.084684685 | 0.0748783  |
| biological_process | guanosine-containing compound metabolic process                         | GO:1901068 | 16084 | 453  | 1.065263094  | 0.00735357  | 0.122522523 | 0.0307943 | 1.059704935 | 0.0128172   | 0.104504505 | 0.0963044  |
| molecular_function | extracellular matrix binding                                            | GO:0050840 | 16826 | 35   | 1.237273752  | 0.0074761   | 0.082882883 | 0.05635   | 1.370731345 | 7.15E-05    | 0.018018018 | 0          |
| biological_process | cAMP metabolic process                                                  | GO:0046058 | 16455 | 82   | 1.154761973  | 0.00747911  | 0.097297297 | 0.031707  | 1.208251675 | 0.000529334 | 0.025225225 | 0.0280519  |
| biological_process | regulation of nucleotide biosynthetic process                           | GO:0038088 | 16463 | 74   | 1.162836052  | 0.00751505  | 0.027027027 | 0.0316494 | 1.136364578 | 0.0208581   | 0.063063063 | 0.12569    |
| biological_process | regulation of purine nucleotide biosynthetic process                    | GO:1900371 | 16463 | 74   | 1.162836052  | 0.00751505  | 0.027027027 | 0.0316494 | 1.136364578 | 0.0208581   | 0.063063063 | 0.12569    |
| biological_process | positive regulation of protein catabolic process                        | GO:0045732 | 16460 | 77   | 1.159579663  | 0.00752715  | 0.014414414 | 0.0316202 | 1.171980896 | 0.00439651  | 0.023423423 | 0.0575085  |
| molecular_function | substrate-specific transmembrane transporter activity                   | GO:0022891 | 16078 | 783  | 1.048877187  | 0.00763429  | 0.190990991 | 0.0560309 | 1.006719902 | 0.369378    | 0.437837838 | -1         |
| biological_process | regulation of cytokine production                                       | GO:0001817 | 16231 | 306  | 1.079288597  | 0.00765714  | 0.037837838 | 0.0325281 | 1.004688913 | 0.443038    | 0.446486847 | -1         |
| biological_process | synaptic vesicle localization                                           | GO:0097479 | 16470 | 67   | 1.170576219  | 0.00769107  | 0.09090909  | 0.0325001 | 1.094046651 | 0.0907703   | 0.23963964  | 0.250867   |
| biological_process | regulation of chemokine production                                      | GO:0032642 | 16494 | 43   | 1.213063723  | 0.00769429  | 0.025225225 | 0.0324694 | 0.977270532 | 0.60201     | 0.632423423 | -1         |
| biological_process | protein depolymerization                                                | GO:0051261 | 16483 | 54   | 1.190024232  | 0.00770535  | 0.030630631 | 0.0324394 | 1.211696054 | 0.00347869  | 0.021621622 | 0.0569148  |
| biological_process | cardiac muscle hypertrophy                                              | GO:0003300 | 16512 | 25   | 1.279278636  | 0.00775024  | 0.027027027 | 0.0323818 | 1.023271016 | 0.428828829 | 0.428828829 | -1         |
| biological_process | striated muscle hypertrophy                                             | GO:0014897 | 16512 | 25   | 1.279278636  | 0.00775024  | 0.027027027 | 0.0323818 | 1.023271016 | 0.420099    | 0.428828829 | -1         |
| biological_process | stem cell proliferation                                                 | GO:0072089 | 16430 | 107  | 1.134643552  | 0.00775781  | 0.072072072 | 0.0323516 | 1.170709012 | 0.010107597 | 0.120720721 | 0.0407132  |
| biological_process | cortical cytoskeleton organization                                      | GO:0030865 | 16515 | 22   | 1.297654889  | 0.00776483  | 0.097297297 | 0.0323215 | 1.367285392 | 0.00141392  | 0.030630631 | 0.043573   |
| biological_process | response to cAMP                                                        | GO:0051591 | 16467 | 70   | 1.166576088  | 0.00778062  | 0.05045045  | 0.0322923 | 1.070267699 | 0.153768    | 0.273873874 | 0.345446   |
| molecular_function | glycosaminoglycan binding                                               | GO:0005539 | 16733 | 128  | 1.122976938  | 0.00778117  | 0.10990991  | 0.0557133 | 1.02410441  | 0.317696    | 0.401801802 | -1         |
| biological_process | histone deacetylation                                                   | GO:0016575 | 16491 | 46   | 1.205630561  | 0.00778184  | 0.018018018 | 0.0322617 | 1.097136982 | 0.126588    | 0.165765766 | 0.302712   |
| biological_process | glial cell proliferation                                                | GO:0014009 | 16517 | 20   | 1.311867933  | 0.00782028  | 0.091891892 | 0.0322346 | 1.114957134 | 0.186473    | 0.273873874 | 0.381049   |
| biological_process | respiratory gaseous exchange                                            | GO:0007585 | 16498 | 39   | 1.223194777  | 0.00782268  | 0.093693694 | 0.0322043 | 1.231926832 | 0.0060084   | 0.133333333 | 0.0651764  |
| biological_process | regulation of mesenchymal cell proliferation                            | GO:0010464 | 16500 | 37   | 1.229009834  | 0.00785714  | 0.003603604 | 0.032177  | 1.254961618 | 0.00358099  | 0.066666667 | 0.0590527  |
| biological_process | ventricular septum development                                          | GO:0003281 | 16499 | 38   | 1.225943047  | 0.00786327  | 0.070207027 | 0.0321471 | 1.263149349 | 0.00245467  | 0.088288288 | 0.050267   |
| biological_process | glycosylation                                                           | GO:0070085 | 16339 | 198  | 1.098453368  | 0.00788981  | 0.046846847 | 0.0321191 | 1.109728326 | 0.00356762  | 0.072072072 | 0.0592241  |
| molecular_function | phosphotransferase activity                                             | GO:0008146 | 16811 | 50   | 1.196674945  | 0.00792409  | 0.061261261 | 0.0611772 | 0.923025143 | 0.827465    | 0.736936937 | -1         |
| biological_process | phospholipase C-activating G-protein coupled receptor signaling pathway | GO:0007200 | 16492 | 45   | 1.207219704  | 0.00795511  | 0.054054054 | 0.0320947 | 1.015369994 | 0.429056    | 0.378378378 | -1         |
| biological_process | ovulation cycle                                                         | GO:0042698 | 16431 | 106  | 1.134663331  | 0.00799552  | 0.084684685 | 0.0320681 | 1.013197669 | 0.4067      | 0.43963964  | -1         |
| biological_process | cellular calcium ion homeostasis                                        | GO:0006874 | 16328 | 209  | 1.09549431   | 0.00805459  | 0.158558559 | 0.0320431 | 1.082642902 | 0.0186468   | 0.181981982 | 0.115903   |
| biological_process | organic hydroxy compound transport                                      | GO:0015850 | 16421 | 116  | 1.128366422  | 0.0081301   | 0.104504505 | 0.0320197 | 1.113635409 | 0.0166975   | 0.109090901 | 0.11236    |
| biological_process | activation of innate immune response                                    | GO:0002218 | 16473 | 64   | 1.173048541  | 0.00814194  | 0.012612613 | 0.0319907 | 0.973129509 | 0.64547     | 0.571171171 | -1         |
| biological_process | regulation of actin filament bundle assembly                            | GO:0032231 | 16493 | 44   | 1.208614477  | 0.00819746  | 0.041441441 | 0.0319655 | 1.040551936 | 0.320434    | 0.396396396 | -1         |
| molecular_function | protein self-association                                                | GO:0043621 | 16826 | 35   | 1.233852053  | 0.00822429  | 0.016216216 | 0.0665507 | 1.303618436 | 0.000921398 | 0.003603604 | 0          |
| molecular_function | SNARE binding                                                           | GO:0000149 | 16816 | 45   | 1.206102592  | 0.00824368  | 0.057657658 | 0.0661549 | 1.020035182 | 0.407848    | 0.437837838 | -1         |
| biological_process | artery morphogenesis                                                    | GO:0048844 | 16498 | 39   | 1.221405574  | 0.008249    | 0.052252252 | 0.0319401 | 1.175918882 | 0.0283835   | 0.183783784 | 0.14241    |
| biological_process | branching involved in mammary gland duct morphogenesis                  | GO:0060444 | 16512 | 25   | 1.276492317  | 0.0082803   | 0.014414414 | 0.0319129 | 1.287086136 | 0.0064207   | 0.061261261 | 0.0678683  |
| biological_process | organic hydroxy compound metabolic process                              | GO:1901615 | 16220 | 317  | 1.076900175  | 0.00832182  | 0.068468468 | 0.0327938 | 1.011607255 | 0.358929    | 0.374777475 | -1         |
| biological_process | female gonad development                                                | GO:0008585 | 16441 | 96   | 1.140674759  | 0.00832636  | 0.05045045  | 0.0327635 | 1.087711962 | 0.0677403   | 0.104504505 | 0.218413   |
| molecular_function | binding, bridging                                                       | GO:0060900 | 16785 | 76   | 1.157961026  | 0.00841042  | 0.005405405 | 0.065797  | 1.159953985 | 0.00774399  | 0.066666667 | 0          |
| biological_process | positive regulation of branching involved in ureteric bud morphogenesis | GO:0090190 | 16517 | 20   | 1.308100838  | 0.016216216 | 0.00847021  | 0.0327459 | 1.141955651 | 0.135616    | 0.18018018  | 0.318388   |
| biological_process | organophosphate metabolic process                                       | GO:0019637 | 15396 | 1141 | 1.039358376  | 0.00850832  | 0.183783784 | 0.0327188 | 1.022695769 | 0.0844085   | 0.216216216 | 0.243914   |
| biological_process | mesoderm development                                                    | GO:0007498 | 16453 | 84   | 1.149859265  | 0.00853939  | 0.032432432 | 0.032691  | 1.127731221 | 0.0210348   | 0.09090909  | 0.126896   |
| biological_process | excretion                                                               | GO:0007588 | 16505 | 32   | 1.243065552  | 0.00856919  | 0.036036036 | 0.0326629 | 1.079918017 | 0.21659     | 0.212612613 | 0.416328   |
| biological_process | response to estrogen stimulus                                           | GO:0043627 | 16371 | 166  | 1.106283907  | 0.00856919  | 0.091891892 | 0.0326328 | 1.042560427 | 0.169922    | 0.281081081 | 0.362641   |
| biological_process | ribonucleoside triphosphate catabolic process                           | GO:0009203 | 16037 | 500  | 1.060569483  | 0.00860707  | 0.16036036  | 0.0326058 | 1.067012847 | 0.00420132  | 0.095495495 | 0.0581133  |
| biological_process | glucose import                                                          | GO:0046323 | 16498 | 39   | 1.219883046  | 0.00862771  | 0.09090909  | 0.0325773 | 1.068300019 | 0.229766    | 0.255855856 | 0.428365   |
| biological_process | regulation of fibroblast growth factor receptor signaling pathway       | GO:0040036 | 16513 | 24   | 1.280187254  | 0.00867491  | 0.030630631 | 0.034502  | 1.242249248 | 0.0198406   | 0.037837838 | 0.123474   |
| biological_process | negative regulation of immune effector process                          | GO:0002698 | 16481 | 56   | 1.183095241  | 0.00872182  | 0.014414414 | 0.0342325 | 0.999228039 | 0.504021    | 0.502702703 | -1         |
| cellular_component | voltage-gated calcium channel complex                                   | GO:0005891 | 16799 | 24   | 1.279943032  | 0.00872384  | 0.021621622 | 0.0326906 | 1.35217619  | 0.00139256  | 0.027027027 | 0          |
| biological_process | negative regulation of cellular response to growth factor stimulus      | GO:0090288 | 16476 | 61   | 1.175371502  | 0.00873237  | 0.052252252 | 0.0339394 | 1.242103284 | 0.000516808 | 0.041441441 | 0.0239931  |
| biological_process | regulation of organ growth                                              | GO:0046620 | 16482 | 55   | 1.184625567  | 0.00876214  | 0.027027027 | 0.033652  | 1.083808382 | 0.140449    | 0.227027027 | 0.328604   |
| biological_process | regulation of response to cytokine stimulus                             | GO:0060759 | 16489 | 48   | 1.19766491   | 0.00876407  | 0.012612613 | 0.0333345 | 1.099809142 | 0.115181    | 0.181981982 | 0.283724   |
| biological_process | regulation of ion transport                                             | GO:0043269 | 16278 | 259  | 1.08447455   | 0.00881587  | 0.27027027  | 0.0333084 | 1.098006085 | 0.00294754  | 0.145945946 | 0.0577004  |
| biological_process | regulation of glucose import                                            | GO:0046324 | 16502 | 35   | 1.231308607  | 0.00882853  | 0.059459459 | 0.0332788 | 1.053580534 | 0.291303    | 0.282882883 | -1         |
| biological_process | autonomic nervous system development                                    | GO:0048483 | 16507 | 30   | 1.249776382  | 0.00885198  | 0.003603604 | 0.0332502 | 1.268412313 | 0.00540605  | 0.028828829 | 0.0628394  |
| biological_process | regulation of innate immune response                                    | GO:0045088 | 16429 | 108  | 1.131102496  | 0.0089509   | 0.014414414 | 0.03421   | 0.992579308 | 0.553332    | 0.551351351 | -1         |
| biological_process | nucleoside phosphate catabolic process                                  | GO:1901292 | 15967 | 570  | 1.0567120936 | 0.009095    | 0.156756757 | 0.0340121 | 1.057478791 | 0.00778558  | 0.095495495 | 0.0768415  |
| biological_process | actomyosin structure organization                                       | GO:0031032 | 16492 | 45   | 1.202809644  | 0.00914592  | 0.113513514 | 0.0340754 | 1.171737666 | 0.0228512   | 0.2         | 0.128932   |
| biological_process | positive regulation of growth                                           | GO:0045927 | 16407 | 130  | 1.118965166  | 0.00916891  | 0.147747748 | 0.0340462 | 1.089968912 | 0.0372343   | 0.192792793 | 0.161671   |
| biological_process | cardiac muscle cell proliferation                                       | GO:0060038 | 16500 | 37   | 1.223580877  | 0.00918136  | 0.012612613 | 0.034016  | 1.068625191 | 0.234598    | 0.344144144 | 0.433655   |
| biological_process | negative regulation of developmental growth                             | GO:0048640 | 16514 | 23   | 1.28362511   | 0.00919622  | 0.079279279 | 0.0339862 | 1.256131026 | 0.0166241   | 0.11531531  |            |

|                    |                                                               |            |       |      |             |            |             |             |             |             |             |            |
|--------------------|---------------------------------------------------------------|------------|-------|------|-------------|------------|-------------|-------------|-------------|-------------|-------------|------------|
| molecular_function | protein kinase A binding                                      | GO:0051018 | 16834 | 27   | 1.260604312 | 0.00945345 | 0.072072072 | 0.0707617   | 1.373872438 | 0.000379098 | 0.023423423 | 0          |
| biological_process | leukocyte migration                                           | GO:0050900 | 16392 | 145  | 1.112050756 | 0.00945473 | 0.057657658 | 0.0337311   | 1.1320841   | 0.00282939  | 0.003603604 | 0.0536621  |
| biological_process | organ regeneration                                            | GO:0031100 | 16473 | 64   | 1.168812071 | 0.00954781 | 0.032432432 | 0.0337089   | 1.05487334  | 0.223094    | 0.245045045 | 0.421809   |
| biological_process | cellular component biogenesis                                 | GO:0044085 | 15040 | 1497 | 1.033343534 | 0.00957428 | 0.046846847 | 0.0345594   | 0.998412429 | 0.544438    | 0.563963964 | -1         |
| biological_process | cell fate specification                                       | GO:0001708 | 16483 | 54   | 1.183670718 | 0.00960117 | 0.03963964  | 0.0345305   | 1.058855624 | 0.226537    | 0.156756757 | 0.424222   |
| biological_process | positive regulation of cytoskeleton organization              | GO:0051495 | 16442 | 95   | 1.138288169 | 0.00960826 | 0.034234234 | 0.0344999   | 1.03732864  | 0.26371     | 0.306306306 | 0.477416   |
| molecular_function | transporter activity                                          | GO:0005215 | 15793 | 1068 | 1.03998064  | 0.21981982 | 0.0704015   | 1.009484107 | 0.289559    | 0.407207207 | -1          |            |
| biological_process | cardiac muscle contraction                                    | GO:0060048 | 16479 | 58   | 1.176954787 | 0.00968575 | 0.018018018 | 0.0344758   | 1.176977723 | 0.0096779   | 0.037837838 | 0.0782286  |
| biological_process | alcohol biosynthetic process                                  | GO:0046165 | 16431 | 106  | 1.130549293 | 0.00975819 | 0.046846847 | 0.0344512   | 0.99044154  | 0.567918    | 0.574774775 | -1         |
| biological_process | lens development in camera-type eye                           | GO:0002088 | 16489 | 48   | 1.194210732 | 0.00979979 | 0.126126126 | 0.0344239   | 1.222725964 | 0.00371849  | 0.111711712 | 0.0585692  |
| biological_process | regulation of cell-matrix adhesion                            | GO:0001952 | 16489 | 48   | 1.193928553 | 0.00988894 | 0.124324324 | 0.0352743   | 1.259893016 | 0.000894233 | 0.075675676 | 0.0361197  |
| biological_process | positive regulation of phosphatidylinositol 3-kinase activity | GO:0043552 | 16517 | 20   | 1.300669444 | 0.00989254 | 0.023423423 | 0.0352428   | 1.23259569  | 0.0357123   | 0.167567568 | 0.157325   |
| biological_process | regulation of cardiac muscle contraction                      | GO:0055117 | 16501 | 36   | 1.223983174 | 0.00989647 | 0.064864865 | 0.0352113   | 1.247733269 | 0.00497814  | 0.036036036 | 0.0609583  |
| biological_process | regulation of cell growth                                     | GO:0001558 | 16297 | 240  | 1.086118404 | 0.00996353 | 0.09009009  | 0.0351859   | 1.089056093 | 0.00803902  | 0.084684685 | 0.0770977  |
| biological_process | positive regulation of T cell mediated immunity               | GO:0002711 | 16509 | 28   | 1.25368399  | 0.00998169 | 0.007207207 | 0.0351559   | 1.010943521 | 0.460039    | 0.49009009  | -1         |
| biological_process | chromatin modification                                        | GO:0016568 | 16133 | 404  | 1.065982393 | 0.0100185  | 0.27027027  | 0.0351277   | 1.145873674 | 1.36E-07    | 0.030630631 | 0          |
| molecular_function | divalent inorganic cation transmembrane transporter activity  | GO:0072509 | 16718 | 143  | 1.111798415 | 0.0100195  | 0.205405405 | 0.0700694   | 1.143640629 | 0.00140455  | 0.140540541 | 0          |
| biological_process | negative regulation of multi-organism process                 | GO:0043901 | 16497 | 40   | 1.211734574 | 0.0101096  | 0.091891892 | 0.0359724   | 1.048035277 | 0.299167    | 0.254054054 | -1         |
| biological_process | monosaccharide metabolic process                              | GO:0005996 | 16325 | 212  | 1.091395196 | 0.0101754  | 0.072072072 | 0.0359464   | 0.996268049 | 0.537782    | 0.535135135 | -1         |
| biological_process | negative regulation of viral reproduction                     | GO:0048525 | 16515 | 22   | 1.284918339 | 0.0102725  | 0.052252525 | 0.0359234   | 1.0999003   | 0.208365    | 0.178378378 | 0.405558   |
| biological_process | regulation of lymphocyte proliferation                        | GO:0050670 | 16410 | 127  | 1.118087278 | 0.0103387  | 0.028828829 | 0.0358975   | 1.017654917 | 0.364746    | 0.418018018 | -1         |
| biological_process | positive regulation of leukocyte proliferation                | GO:0070665 | 16448 | 89   | 1.141193088 | 0.0103519  | 0.03963964  | 0.0358666   | 1.074615519 | 0.110761    | 0.187387387 | 0.276229   |
| biological_process | interleukin-8 production                                      | GO:0032637 | 16504 | 33   | 1.232218596 | 0.010365   | 0.054054054 | 0.0358357   | 0.943146006 | 0.714412    | 0.700900901 | -1         |
| biological_process | purine ribonucleoside triphosphate catabolic process          | GO:0009207 | 16038 | 499  | 1.058792994 | 0.0104496  | 0.165765766 | 0.0358117   | 1.065859999 | 0.00483428  | 0.095495495 | 0.0613382  |
| biological_process | second-messenger-mediated signaling                           | GO:0019932 | 16420 | 117  | 1.122815416 | 0.0104663  | 0.136936937 | 0.0357812   | 1.104789013 | 0.0244108   | 0.241441441 | 0.135341   |
| biological_process | phospholipid metabolic process                                | GO:0006644 | 16308 | 229  | 1.087439657 | 0.0105043  | 0.156756757 | 0.0357529   | 1.035955568 | 0.171342    | 0.295495495 | 0.364426   |
| biological_process | regulation of striated muscle cell differentiation            | GO:0051153 | 16469 | 68   | 1.161242136 | 0.0105065  | 0.072072072 | 0.0357211   | 1.191694386 | 0.00303844  | 0.052252252 | 0.0571012  |
| biological_process | cardiac atrium development                                    | GO:0003230 | 16513 | 24   | 1.271510239 | 0.0105685  | 0.032432432 | 0.0374131   | 1.220889279 | 0.0303503   | 0.091891892 | 0.146098   |
| biological_process | regulation of cAMP biosynthetic process                       | GO:0030817 | 16476 | 61   | 1.169965157 | 0.0106253  | 0.036036036 | 0.0373854   | 1.178493979 | 0.0077796   | 0.03963964  | 0.0769337  |
| biological_process | synaptic vesicle exocytosis                                   | GO:0016079 | 16509 | 28   | 1.25094138  | 0.0106711  | 0.054054054 | 0.0373567   | 1.199337111 | 0.0337371   | 0.124324324 | 0.153131   |
| biological_process | cellular response to extracellular stimulus                   | GO:0031668 | 16385 | 152  | 1.107182669 | 0.010742   | 0.072072072 | 0.0407409   | 1.043883263 | 0.173279    | 0.227027027 | 0.366615   |
| biological_process | protein glycosylation                                         | GO:0006486 | 16359 | 178  | 1.098930049 | 0.0107658  | 0.09009009  | 0.0406714   | 1.117294354 | 0.00321282  | 0.064864865 | 0.0566221  |
| biological_process | macromolecule glycosylation                                   | GO:0043413 | 16359 | 178  | 1.098930049 | 0.0107658  | 0.09009009  | 0.0406714   | 1.117294354 | 0.00321282  | 0.064864865 | 0.0566221  |
| cellular_component | lysosome                                                      | GO:0000323 | 16570 | 253  | 1.082681262 | 0.0108595  | 0.108108108 | 0.0234727   | 1.042901817 | 0.11685     | 0.259459459 | 0.201234   |
| cellular_component | membrane coat                                                 | GO:0005764 | 16570 | 253  | 1.082681262 | 0.0108595  | 0.108108108 | 0.0234727   | 1.042901817 | 0.11685     | 0.259459459 | 0.201234   |
| cellular_component | coated membrane                                               | GO:0030117 | 16751 | 72   | 1.155643023 | 0.0109403  | 0.10990991  | 0.0231166   | 1.179857782 | 0.00403543  | 0.03963964  | 0          |
| cellular_component | cellular response to amino acid stimulus                      | GO:0048475 | 16751 | 72   | 1.155643023 | 0.0109403  | 0.10990991  | 0.0231166   | 1.179857782 | 0.00403543  | 0.03963964  | 0          |
| biological_process | adipose tissue development                                    | GO:0071230 | 16501 | 36   | 1.220247656 | 0.0109705  | 0.021621622 | 0.0406574   | 1.018492779 | 0.423736    | 0.41981982  | -1         |
| biological_process | nucleoside triphosphate catabolic process                     | GO:0060612 | 16512 | 25   | 1.264234446 | 0.0110083  | 0.068468468 | 0.0406255   | 1.106744506 | 0.177455    | 0.25045045  | 0.371598   |
| biological_process | regulation of multicellular organism growth                   | GO:0009143 | 16029 | 508  | 1.057722639 | 0.0110456  | 0.169369369 | 0.0405936   | 1.066233251 | 0.00431735  | 0.086486486 | 0.0576512  |
| biological_process | interferon-beta production                                    | GO:0040014 | 16458 | 79   | 1.148253099 | 0.0110747  | 0.09009009  | 0.0405609   | 1.139169271 | 0.0158722   | 0.063063063 | 0.108498   |
| biological_process | blood coagulation                                             | GO:0032608 | 16512 | 25   | 1.263861969 | 0.0111022  | 0.014414414 | 0.0405281   | 1.119824728 | 0.149524    | 0.201801802 | 0.340523   |
| biological_process | regulation of glycoprotein biosynthetic process               | GO:0070796 | 16433 | 104  | 1.129035248 | 0.0111154  | 0.095495495 | 0.0404938   | 1.04192904  | 0.228769    | 0.1495495   | 0.427437   |
| biological_process | cellular response to external stimulus                        | GO:0010559 | 16511 | 26   | 1.258546268 | 0.0111497  | 0.005405405 | 0.0404618   | 1.181618285 | 0.0542177   | 0.097297297 | 0.192993   |
| biological_process | tissue remodeling                                             | GO:0071496 | 16335 | 202  | 1.092243632 | 0.0111659  | 0.093693694 | 0.040428    | 1.045013514 | 0.132456    | 0.234234234 | 0.312826   |
| cellular_component | transcriptional repressor complex                             | GO:0048771 | 16421 | 116  | 1.121913133 | 0.0112379  | 0.097297297 | 0.0412421   | 1.112092458 | 0.0179299   | 0.16036036  | 0.115083   |
| cellular_component | membrane organization                                         | GO:0017053 | 16766 | 57   | 1.174225422 | 0.0112385  | 0.131531532 | 0.0303808   | 1.269673914 | 0.000205813 | 0.088288288 | 0          |
| biological_process | protein oligomerization                                       | GO:0061024 | 16229 | 308  | 1.074828708 | 0.0113245  | 0.091891892 | 0.0412152   | 1.075044435 | 0.0106495   | 0.111711712 | 0.0847873  |
| biological_process | embryonic limb morphogenesis                                  | GO:0051259 | 16206 | 331  | 1.071592227 | 0.0113375  | 0.043243243 | 0.0411805   | 1.009316693 | 0.383419    | 0.432424242 | -1         |
| biological_process | embryonic appendage morphogenesis                             | GO:0030326 | 16438 | 99   | 1.131831154 | 0.0113406  | 0.046846847 | 0.0411088   | 1.134369547 | 0.0100992   | 0.102702703 | 0.0804081  |
| biological_process | cytokine metabolic process                                    | GO:0035113 | 16438 | 99   | 1.131831154 | 0.0113406  | 0.046846847 | 0.0411088   | 1.134369547 | 0.0100992   | 0.102702703 | 0.0804081  |
| biological_process | ephrin receptor signaling pathway                             | GO:0042107 | 16452 | 85   | 1.142278616 | 0.0113673  | 0.05045045  | 0.0410757   | 0.984850993 | 0.595844    | 0.583783784 | -1         |
| cellular_component | cortical actin cytoskeleton                                   | GO:0048013 | 16505 | 32   | 1.232052999 | 0.0114272  | 0.043243243 | 0.0410463   | 1.302395021 | 0.00150971  | 0.063063063 | 0.0428943  |
| biological_process | regulation of lipid metabolic process                         | GO:0030864 | 16789 | 34   | 1.224931429 | 0.0114818  | 0.102702703 | 0.0301732   | 1.364245789 | 0.000115475 | 0.034234234 | 0          |
| biological_process | sensory perception of sound                                   | GO:0019216 | 16369 | 168  | 1.100744221 | 0.0115053  | 0.131531532 | 0.0410187   | 1.063816158 | 0.0749419   | 0.259459459 | 0.228631   |
| biological_process | regulation of lipid kinase activity                           | GO:0007605 | 16430 | 107  | 1.126446034 | 0.0115184  | 0.100900901 | 0.0409844   | 1.0981147   | 0.0389029   | 0.207207207 | 0.164046   |
| biological_process | response to extracellular stimulus                            | GO:0043550 | 16508 | 29   | 1.243301686 | 0.0115623  | 0.034234234 | 0.0417882   | 1.157000676 | 0.0713678   | 0.227027027 | 0.223388   |
| biological_process | regulation of protein complex disassembly                     | GO:0009991 | 16203 | 334  | 1.071019093 | 0.0115702  | 0.106306306 | 0.0417528   | 1.020060254 | 0.260628    | 0.322522523 | 0.473307   |
| biological_process | myeloid cell development                                      | GO:0043244 | 16486 | 51   | 1.183187509 | 0.0116216  | 0.023423423 | 0.0425542   | 1.158995965 | 0.0244359   | 0.066666667 | 0.134992   |
| biological_process | negative regulation of T cell proliferation                   | GO:0061515 | 16513 | 24   | 1.267070953 | 0.0116698  | 0.001801802 | 0.0433528   | 1.194565976 | 0.0492529   | 0.025225225 | 0.182715   |
| biological_process | cellular metal ion homeostasis                                | GO:0042130 | 16503 | 34   | 1.2241047   | 0.0117353  | 0.01981982  | 0.0433225   | 0.983300192 | 0.567058    | 0.563963964 | -1         |
| biological_process | cAMP-mediated signaling                                       | GO:0006875 | 16290 | 247  | 1.082442606 | 0.011875   | 0.120720721 | 0.0433006   | 1.049276332 | 0.0882854   | 0.225225225 | 0.248045   |
| biological_process | recycling endosome                                            | GO:0019933 | 16509 | 28   | 1.246406354 | 0.011902   | 0.064864865 | 0.0432661   | 1.113974977 | 0.147905    | 0.207207207 | 0.337431   |
| cellular_component | immune effector process                                       | GO:0055037 | 16753 | 70   | 1.155550515 | 0.0119451  | 0.081081081 | 0.0299874   | 1.025537199 | 0.355381    | 0.394594595 | -1         |
| biological_process | response to epidermal growth factor stimulus                  | GO:0002252 | 16201 | 336  | 1.070391944 | 0.0119777  | 0.073873874 | 0.0432371   | 0.963610095 | 0.878477    | 0.897297297 | -1         |
| biological_process | leukocyte activation                                          | GO:0070849 | 16517 | 20   | 1.291188217 | 0.0120068  | 0.014414414 | 0.043203    | 1.001762903 | 0.494569    | 0.466666667 | -1         |
| biological_process | cAMP biosynthetic process                                     | GO:0045321 | 16086 | 451  | 1.06051617  | 0.0120027  | 0.115315315 | 0.0431657   | 1.099145334 | 0.000108816 | 0.005405405 | 0.00845841 |
| biological_process | sensory perception of pain                                    | GO:0006171 | 16474 | 63   | 1.163723005 | 0.0120629  | 0.03963964  | 0.0431346   | 1.18970846  | 0.00448686  | 0.028828829 | 0.057289   |
| biological_process | UDP-glycosyltransferase activity                              | GO:0019233 | 16459 | 78   | 1.147014104 | 0.0120917  | 0.115315315 | 0.0431006   | 1.09444192  | 0.0737975   | 0.230630631 | 0.227869   |
| molecular_function | regulation of body fluid levels                               | GO:0008194 | 16758 | 103  | 1.127762001 | 0.0121363  | 0.007207207 | 0.0809034   | 1.10441311  | 0.032805    | 0.046846847 | 0.0517591  |
| biological_process | phosphatidylinositol 3-kinase binding                         | GO:0050878 | 16339 | 198  | 1.091863075 | 0.0121484  | 0.12972973  | 0.0438934   | 1.104762703 | 0.00510326  | 0.010810811 | 0.0605785  |
| molecular_function | striated muscle cell proliferation                            | GO:0043548 | 16837 | 24   | 1.265004961 | 0.0122155  | 0.055855856 | 0.0804595   | 1.171041156 | 0.0371977   | 0.147747748 | 0.1        |

|                    |                                                                                                 |            |       |      |             |           |             |           |             |             |             |            |
|--------------------|-------------------------------------------------------------------------------------------------|------------|-------|------|-------------|-----------|-------------|-----------|-------------|-------------|-------------|------------|
| biological_process | intracellular transport                                                                         | GO:0046907 | 15539 | 998  | 1.03966894  | 0.0125756 | 0.221621622 | 0.0444202 | 1.030607372 | 0.0420319   | 0.209009009 | 1.170181   |
| biological_process | negative regulation of angiogenesis                                                             | GO:0016525 | 16486 | 51   | 1.18016653  | 0.012808  | 1.122522523 | 0.0440085 | 1.110425547 | 0.085659    | 0.151351351 | 0.243735   |
| biological_process | carbohydrate derivative catabolic process                                                       | GO:1901136 | 15953 | 584  | 1.052370223 | 0.0128178 | 0.16036036  | 0.0451864 | 1.053712094 | 0.011041    | 0.153513514 | 0.0853472  |
| biological_process | post-embryonic development                                                                      | GO:0009791 | 16442 | 95   | 1.131607519 | 0.0129338 | 0.118918919 | 0.0451612 | 1.206792829 | 0.000231616 | 0.063063063 | 0.0148768  |
| biological_process | cyclic-nucleotide-mediated signaling                                                            | GO:0019935 | 16504 | 33   | 1.223529671 | 0.0129963 | 0.079279279 | 0.0451299 | 1.125745364 | 0.105215    | 0.201801802 | 0.267264   |
| biological_process | positive regulation of sequence-specific DNA binding transcription factor activity              | GO:0051091 | 16389 | 148  | 1.105181581 | 0.0130001 | 0.030630631 | 0.0450919 | 1.086281556 | 0.0339029   | 0.140540541 | 0.153627   |
| biological_process | positive regulation of autophagy                                                                | GO:0010508 | 16517 | 20   | 1.287191348 | 0.0130094 | 0.073873874 | 0.0458657 | 1.189337596 | 0.0711227   | 0.169369369 | 0.221903   |
| biological_process | negative regulation of transmembrane receptor protein serine/threonine kinase signaling pathway | GO:0090101 | 16466 | 71   | 1.152030987 | 0.0130878 | 0.066666667 | 0.0458359 | 1.243193087 | 0.000187582 | 0.028828829 | 0.0129721  |
| biological_process | cyclic purine nucleotide metabolic process                                                      | GO:0052652 | 16452 | 85   | 1.138694701 | 0.0131929 | 0.057657658 | 0.0458091 | 1.141191633 | 0.0118963   | 0.063063063 | 0.0899577  |
| biological_process | homotypic cell-cell adhesion                                                                    | GO:0034109 | 16501 | 36   | 1.213132706 | 0.0132992 | 0.054054054 | 0.0457826 | 1.185059219 | 0.0270966   | 0.091891892 | 0.135959   |
| biological_process | synaptic vesicle transport                                                                      | GO:0048489 | 16473 | 64   | 1.159649431 | 0.01333   | 0.09009009  | 0.0457086 | 1.091142205 | 0.102877    | 0.237837838 | 0.264185   |
| biological_process | establishment of synaptic vesicle localization                                                  | GO:0097480 | 16473 | 64   | 1.159649431 | 0.01333   | 0.09009009  | 0.0457086 | 1.091142205 | 0.102877    | 0.237837838 | 0.264185   |
| biological_process | negative regulation of BMP signaling pathway                                                    | GO:0030514 | 16505 | 32   | 1.225654834 | 0.0134451 | 0.066666667 | 0.0456832 | 1.236251677 | 0.0102508   | 0.052252252 | 0.0830952  |
| biological_process | positive regulation of innate immune response                                                   | GO:0045089 | 16454 | 83   | 1.139836538 | 0.0134786 | 0.003603604 | 0.0456484 | 0.967645452 | 0.695643    | 0.601801802 | -1         |
| biological_process | embryonic hindlimb morphogenesis                                                                | GO:0035116 | 16511 | 26   | 1.250271591 | 0.0134803 | 0.01981982  | 0.04561   | 1.218712466 | 0.0266096   | 0.127927928 | 0.138415   |
| biological_process | negative regulation of transmission of nerve impulse                                            | GO:0051970 | 16501 | 36   | 1.212501161 | 0.0135251 | 0.113513514 | 0.0455767 | 0.965372516 | 0.640694    | 0.553153153 | -1         |
| biological_process | branching involved in ureteric bud morphogenesis                                                | GO:0001658 | 16486 | 51   | 1.178324065 | 0.0135818 | 0.043243243 | 0.046349  | 1.308062543 | 6.77E-05    | 0.009009009 | 0.00301387 |
| biological_process | mammary gland development                                                                       | GO:0030879 | 16406 | 131  | 1.110986575 | 0.0135908 | 1.122522523 | 0.046311  | 1.132911634 | 0.00408058  | 0.136936937 | 0.0586656  |
| biological_process | cardiac atrium morphogenesis                                                                    | GO:0003209 | 16516 | 21   | 1.278076667 | 0.013602  | 0.046846847 | 0.0462734 | 1.258917265 | 0.0198718   | 0.061261261 | 0.125005   |
| biological_process | transferase activity, transferring hexosyl groups                                               | GO:0016758 | 16700 | 161  | 1.100007998 | 0.0136071 | 0.016216216 | 0.0803659 | 1.084699208 | 0.0307148   | 0.108108108 | 0.0530784  |
| biological_process | cyclic nucleotide biosynthetic process                                                          | GO:0009190 | 16448 | 89   | 1.134558023 | 0.01374   | 0.055855856 | 0.0470518 | 1.123970183 | 0.0211198   | 0.084684685 | 0.126692   |
| biological_process | negative regulation of intracellular transport                                                  | GO:0032387 | 16472 | 65   | 1.157466883 | 0.013789  | 0.009009009 | 0.0478175 | 1.082872877 | 0.123124    | 0.178378378 | 0.299358   |
| biological_process | myeloid cell homeostasis                                                                        | GO:0002262 | 16435 | 102  | 1.125511472 | 0.0138204 | 0.027027027 | 0.0477811 | 1.168750122 | 0.00153282  | 0.016216216 | 0.0443698  |
| biological_process | negative regulation of endopeptidase activity                                                   | GO:0010951 | 16444 | 93   | 1.131445576 | 0.0138409 | 0.077477477 | 0.0477435 | 0.930376533 | 0.878258    | 0.917117117 | -1         |
| biological_process | cytosolic calcium ion homeostasis                                                               | GO:0051480 | 16385 | 152  | 1.102576038 | 0.0138861 | 0.127927928 | 0.0477089 | 1.304910647 | 0.201943    | 0.304504505 | 0.398451   |
| biological_process | coagulation                                                                                     | GO:0050817 | 16430 | 107  | 1.122385138 | 0.0139099 | 0.102702703 | 0.0476719 | 1.056647898 | 0.154294    | 0.068468468 | 0.345348   |
| biological_process | positive regulation of organelle organization                                                   | GO:0010638 | 16341 | 196  | 1.090164552 | 0.0139252 | 0.064864865 | 0.0476338 | 1.078348806 | 0.0279926   | 0.122522523 | 0.141166   |
| biological_process | palate development                                                                              | GO:0060021 | 16473 | 64   | 1.15834939  | 0.0139599 | 0.072072072 | 0.0475982 | 1.128622299 | 0.0370747   | 0.214414414 | 0.160426   |
| biological_process | cell adhesion mediated by integrin                                                              | GO:0033627 | 16498 | 39   | 1.202989495 | 0.013965  | 0.023423243 | 0.0475591 | 1.268200833 | 0.00183917  | 0.030630631 | 0.0480657  |
| biological_process | sphingolipid metabolic process                                                                  | GO:0006665 | 16457 | 80   | 1.141532382 | 0.0139771 | 0.025225225 | 0.0483142 | 1.050045805 | 0.218536    | 0.10990991  | 0.418218   |
| biological_process | regulation of T cell differentiation                                                            | GO:0045580 | 16462 | 75   | 1.145814253 | 0.014183  | 0.054054054 | 0.0490905 | 1.124600815 | 0.305167    | 0.072072072 | 0.146504   |
| biological_process | hair follicle development                                                                       | GO:0001942 | 16465 | 72   | 1.148513634 | 0.0143545 | 0.167567568 | 0.051352  | 1.149749848 | 0.0137036   | 0.131531532 | 0.0991442  |
| biological_process | molting cycle process                                                                           | GO:0022404 | 16465 | 72   | 1.148513634 | 0.0143545 | 0.167567568 | 0.051352  | 1.149749848 | 0.0137036   | 0.131531532 | 0.0991442  |
| biological_process | hair cycle process                                                                              | GO:0022405 | 16465 | 72   | 1.148513634 | 0.0143545 | 0.167567568 | 0.051352  | 1.149749848 | 0.0137036   | 0.131531532 | 0.0991442  |
| biological_process | response to purine-containing compound                                                          | GO:0014074 | 16429 | 108  | 1.121047057 | 0.0144113 | 0.03963964  | 0.0513167 | 1.086492404 | 0.0591506   | 0.167567568 | 0.202712   |
| biological_process | negative regulation of Ras protein signal transduction                                          | GO:0046580 | 16505 | 32   | 1.222771314 | 0.0144508 | 0.034234234 | 0.0512792 | 1.181774685 | 0.037314    | 0.057657658 | 0.161449   |
| biological_process | feeding behavior                                                                                | GO:0007631 | 16467 | 70   | 1.150446946 | 0.0144514 | 0.115315315 | 0.0512369 | 1.106046889 | 0.0617791   | 0.122522523 | 0.208637   |
| biological_process | response to fatty acid                                                                          | GO:0070542 | 16500 | 37   | 1.207068482 | 0.0144792 | 0.082882883 | 0.0511981 | 1.08806615  | 0.176484    | 0.201801802 | 0.370618   |
| biological_process | nucleocytoplasmic transport                                                                     | GO:0006913 | 16182 | 355  | 1.066184875 | 0.0145025 | 0.079279279 | 0.0511588 | 1.045738511 | 0.0656621   | 0.136936937 | 0.218072   |
| biological_process | positive regulation of leukocyte chemotaxis                                                     | GO:0002690 | 16496 | 41   | 1.19596065  | 0.0147765 | 0.061261261 | 0.0534936 | 1.16102547  | 0.0368835   | 0.091891892 | 0.16048    |
| cellular_component | basal part of cell                                                                              | GO:0045178 | 16791 | 32   | 1.221819189 | 0.0147969 | 0.045045045 | 0.0349581 | 1.135361552 | 0.0921642   | 0.218018018 | 0.147558   |
| biological_process | regulation of T cell activation                                                                 | GO:0050863 | 16374 | 163  | 1.097858215 | 0.0148272 | 0.041441441 | 0.0534562 | 1.095172442 | 0.0712126   | 0.082882883 | 0.11488    |
| biological_process | protein complex assembly                                                                        | GO:0006461 | 15825 | 712  | 1.046004435 | 0.0148763 | 0.001801802 | 0.0534187 | 0.999680935 | 0.506076    | 0.511711712 | -1         |
| biological_process | negative regulation of small GTPase mediated signal transduction                                | GO:0051058 | 16504 | 33   | 1.218193916 | 0.0148834 | 0.030630631 | 0.0533758 | 1.196572381 | 0.0251252   | 0.052252252 | 0.136162   |
| biological_process | fat cell differentiation                                                                        | GO:0045444 | 16402 | 135  | 1.107513646 | 0.0149082 | 0.034234234 | 0.0533352 | 1.08516325  | 0.0426423   | 0.169369369 | 0.173022   |
| biological_process | amino acid transmembrane transport                                                              | GO:0003333 | 16517 | 20   | 1.280152898 | 0.0149513 | 0.059459459 | 0.053297  | 1.15836035  | 0.10984     | 0.304504505 | 0.276331   |
| biological_process | regulation of steroid biosynthetic process                                                      | GO:0050810 | 16495 | 42   | 1.193163717 | 0.0149648 | 0.027027027 | 0.0532551 | 1.026338133 | 0.383624    | 0.423423423 | -1         |
| biological_process | determination of leaf left/right asymmetry                                                      | GO:0061371 | 16501 | 36   | 1.208637992 | 0.0149807 | 0.082882883 | 0.0532136 | 1.309124075 | 0.000649844 | 0.012612613 | 0.0315743  |
| biological_process | purine nucleotide catabolic process                                                             | GO:0006195 | 15994 | 543  | 1.0528831   | 0.0149927 | 0.187387387 | 0.0531716 | 1.058237158 | 0.00842403  | 0.108108108 | 0.0771997  |
| biological_process | positive regulation of immune effector process                                                  | GO:0002699 | 16440 | 97   | 1.126840646 | 0.0149995 | 0.106306306 | 0.053129  | 1.002289838 | 0.484401    | 0.502702703 | -1         |
| biological_process | positive regulation of protein import into nucleus                                              | GO:0042307 | 16482 | 55   | 1.168600712 | 0.0150289 | 0.045045045 | 0.0530894 | 0.996509419 | 0.517934    | 0.499099099 | -1         |
| biological_process | positive regulation of T cell differentiation                                                   | GO:0045582 | 16486 | 51   | 1.174968739 | 0.0150949 | 0.014414414 | 0.0538269 | 1.195565646 | 0.00770156  | 0.037837838 | 0.0773843  |
| biological_process | regulation of kidney development                                                                | GO:0090183 | 16498 | 39   | 1.20002196  | 0.0151506 | 0.025225225 | 0.0545608 | 1.15816639  | 0.0433705   | 0.147747748 | 0.174608   |
| biological_process | regulation of the force of heart contraction                                                    | GO:0002026 | 16515 | 22   | 1.266310993 | 0.015195  | 0.145945946 | 0.0545223 | 1.128649612 | 0.14782     | 0.25045045  | 0.337563   |
| biological_process | regulation of synaptic transmission, GABAergic                                                  | GO:0032228 | 16512 | 25   | 1.249214442 | 0.0153901 | 0.218018018 | 0.0552722 | 1.076056292 | 0.254905    | 0.315315315 | 0.465593   |
| biological_process | negative regulation of cellular catabolic process                                               | GO:0031330 | 16487 | 50   | 1.175976807 | 0.0154431 | 0.084684685 | 0.0560011 | 1.107445923 | 0.0937665   | 0.122522523 | 0.254613   |
| biological_process | cell proliferation in forebrain                                                                 | GO:0021846 | 16513 | 24   | 1.254156209 | 0.0154576 | 0.052252252 | 0.0559576 | 1.148616092 | 0.103483    | 0.263063063 | 0.264982   |
| biological_process | protein complex biogenesis                                                                      | GO:0070271 | 15824 | 713  | 1.045631392 | 0.0154883 | 0.001801802 | 0.0559164 | 0.999700214 | 0.505733    | 0.506306306 | -1         |
| biological_process | regulation of protein catabolic process                                                         | GO:0042176 | 16383 | 154  | 1.099855539 | 0.0155273 | 0.027027027 | 0.0558764 | 1.138672215 | 0.00137407  | 0.014414414 | 0.0436429  |
| biological_process | purine-containing compound catabolic process                                                    | GO:0072523 | 15987 | 550  | 1.052194033 | 0.015533  | 0.183783784 | 0.0558319 | 1.052965812 | 0.0143312   | 0.122522523 | 0.101183   |
| biological_process | regulation of cytokine-mediated signaling pathway                                               | GO:0001959 | 16495 | 42   | 1.191813288 | 0.015548  | 0.027027027 | 0.0557888 | 1.13219858  | 0.068666    | 0.183783784 | 0.221047   |
| biological_process | ureteric bud morphogenesis                                                                      | GO:0060675 | 16480 | 57   | 1.164486294 | 0.0155944 | 0.030630631 | 0.05575   | 1.295109874 | 5.54E-05    | 0.010810811 | 0.00313641 |
| biological_process | calcium ion transport                                                                           | GO:0006816 | 16329 | 208  | 1.085626916 | 0.015681  | 0.266666667 | 0.0564784 | 1.137768079 | 0.000266857 | 0.145945946 | 0.0144506  |
| biological_process | organonitrogen compound metabolic process                                                       | GO:1901564 | 15062 | 1475 | 1.03087428  | 0.0157091 | 0.117111711 | 0.0564367 | 1.011860995 | 0.204331    | 0.322522523 | 0.401452   |
| biological_process | negative regulation of catabolic process                                                        | GO:0009895 | 16460 | 77   | 1.141192982 | 0.0157398 | 0.10990991  | 0.0563954 | 1.085341888 | 0.0967855   | 0.18018018  | 0.258284   |
| biological_process | molting cycle                                                                                   | GO:0042303 | 16458 | 79   | 1.139360622 | 0.0157552 | 0.142342342 | 0.0563067 | 1.145439469 | 0.0124041   | 0.12972973  | 0.0957297  |
| biological_process | hair cycle                                                                                      | GO:0042633 | 16458 | 79   | 1.139360622 | 0.0157552 | 0.142342342 | 0.0563067 | 1.145439469 | 0.0124041   | 0.12972973  | 0.0957297  |
| biological_process | eye development                                                                                 | GO:0001654 | 16280 | 257  | 1.076830288 | 0.0157775 | 0.140540541 | 0.0562644 | 1.051867062 | 0.07332     | 0.304504505 | 0.22775    |
| molecular_function | RNA polymerase II transcription factor binding                                                  | GO:0001085 | 16799 | 62   | 1.157283197 | 0.0158151 | 0.088288288 | 0.0804885 | 1.259829166 | 0.000192461 | 0.010810811 | 0          |
| biological_process | response to progesterone stimulus                                                               | GO:0032570 | 16506 | 31   | 1.222385349 | 0.0159115 | 0.016216216 | 0.0562372 | 1.011464736 | 0.45596     | 0.427027027 | -1         |
| biological_process | positive regulation of mitosis                                                                  | GO:0045840 | 16510 | 27   | 1.238265704 | 0.0159304 | 0.023423423 | 0.0561496 | 1.12052077  | 0.138838    | 0.210810811 | 0.325928   |
| biological_process | positive regulation of nuclear division                                                         | GO:0051785 | 16510 | 27   | 1.238265704 | 0.0159304 |             |           |             |             |             |            |

|                    |                                                                                                        |            |       |     |             |           |             |           |             |             |             |           |
|--------------------|--------------------------------------------------------------------------------------------------------|------------|-------|-----|-------------|-----------|-------------|-----------|-------------|-------------|-------------|-----------|
| biological_process | head morphogenesis                                                                                     | GO:0060323 | 16503 | 34  | 1.211271468 | 0.0163421 | 0.064864865 | 0.0565535 | 1.136769005 | 0.0833773   | 0.174774775 | 0.243722  |
| biological_process | negative regulation of neurological system process                                                     | GO:0031645 | 16495 | 42  | 1.189933052 | 0.0163924 | 0.142342342 | 0.0572656 | 1.034049115 | 0.350992    | 0.403603604 | -1        |
| molecular_function | enhancer binding                                                                                       | GO:0035326 | 16839 | 22  | 1.262506065 | 0.0164199 | 0.032432432 | 0.0797306 | 1.378069913 | 0.00105774  | 0.003603604 | 0         |
| biological_process | aminoglycan metabolic process                                                                          | GO:0006022 | 16453 | 84  | 1.133989556 | 0.0164856 | 0.030630631 | 0.0572327 | 1.08837152  | 0.0798003   | 0.162162162 | 0.236504  |
| biological_process | pattern recognition receptor signaling pathway                                                         | GO:0002221 | 16484 | 53  | 1.168694845 | 0.0165619 | 0.016216216 | 0.057946  | 1.035439259 | 0.327241    | 0.407207207 | -1        |
| cellular_component | cytoplasmic mRNA processing body                                                                       | GO:0009332 | 16780 | 43  | 1.187293984 | 0.0165852 | 0.095495495 | 0.0368737 | 1.236990457 | 0.00351734  | 0.036036036 | 0         |
| biological_process | somitogenesis                                                                                          | GO:0001756 | 16481 | 56  | 1.163760917 | 0.0167438 | 0.059459459 | 0.0579248 | 1.098622837 | 0.100194    | 0.234234234 | 0.262361  |
| molecular_function | hydrolase activity, hydrolyzing O-glycosyl compounds                                                   | GO:0004553 | 16776 | 85  | 1.132803337 | 0.0167472 | 0.032432432 | 0.0793634 | 0.983098022 | 0.606661    | 0.581981982 | -1        |
| cellular_component | vacuolar membrane                                                                                      | GO:0005774 | 16683 | 140 | 1.103169535 | 0.0168653 | 0.073873874 | 0.0436395 | 1.039153809 | 0.210206    | 0.268468468 | 0.341696  |
| biological_process | microtubule polymerization                                                                             | GO:0046785 | 16513 | 24  | 1.249908402 | 0.016915  | 0.127927928 | 0.0579023 | 1.164115801 | 0.081724    | 0.158558559 | 0.240349  |
| biological_process | glycosaminoglycan metabolic process                                                                    | GO:0030203 | 16463 | 74  | 1.142012523 | 0.0169742 | 0.090900909 | 0.0578644 | 1.120643157 | 0.035806    | 0.113513514 | 0.156987  |
| biological_process | regulation of collagen biosynthetic process                                                            | GO:0032965 | 16517 | 20  | 1.273537899 | 0.0169986 | 0.061261261 | 0.0578219 | 0.984844235 | 0.546776    | 0.605405405 | -1        |
| molecular_function | phosphoric ester hydrolase activity                                                                    | GO:0042578 | 16532 | 329 | 1.06680473  | 0.0170198 | 0.207207207 | 0.0789855 | 1.07720203  | 0.00715218  | 0.090909009 | 0         |
| biological_process | bone resorption                                                                                        | GO:0045453 | 16495 | 42  | 1.184674447 | 0.0170775 | 0.016216216 | 0.0577869 | 1.189889861 | 0.0164122   | 0.045045045 | 0.11206   |
| biological_process | prostate gland epithelium morphogenesis                                                                | GO:0060740 | 16510 | 27  | 1.235103503 | 0.0171016 | 0.111711712 | 0.0577444 | 1.154010533 | 0.0826881   | 0.227027027 | 0.243515  |
| biological_process | protein homooligomerization                                                                            | GO:0051260 | 16321 | 216 | 1.082639312 | 0.017109  | 0.010810811 | 0.0576998 | 0.995544431 | 0.545468    | 0.553153153 | -1        |
| biological_process | cerebral cortex development                                                                            | GO:0021987 | 16467 | 70  | 1.1457668   | 0.0171366 | 0.158558559 | 0.057658  | 1.096498285 | 0.0805563   | 0.254054054 | 0.238356  |
| biological_process | regulation of sodium ion transport                                                                     | GO:0002028 | 16496 | 41  | 1.190497972 | 0.0172    | 0.165765766 | 0.0583643 | 1.24012516  | 0.00383293  | 0.064864865 | 0.0596266 |
| biological_process | purine nucleoside triphosphate catabolic process                                                       | GO:0009146 | 16035 | 502 | 1.053672476 | 0.01721   | 0.189189189 | 0.0583197 | 1.064491493 | 0.0551815   | 0.102702703 | 0.0637784 |
| cellular_component | tight junction                                                                                         | GO:0005923 | 16737 | 86  | 1.131299748 | 0.0172389 | 0.156756757 | 0.0430583 | 1.154483695 | 0.00642689  | 0.156756757 | 0         |
| cellular_component | occluding junction                                                                                     | GO:0070160 | 16737 | 86  | 1.131299748 | 0.0172389 | 0.156756757 | 0.0430583 | 1.154483695 | 0.00642689  | 0.156756757 | 0         |
| cellular_component | endocytic vesicle                                                                                      | GO:0030139 | 16729 | 94  | 1.125483704 | 0.0172925 | 0.048648649 | 0.0427579 | 1.04107916  | 0.24454     | 0.268468468 | 0.407122  |
| biological_process | regulation of G-protein coupled receptor protein signaling pathway                                     | GO:0008277 | 16435 | 102 | 1.120353992 | 0.0173498 | 0.165765766 | 0.0582928 | 1.04756239  | 0.20199     | 0.302702703 | 0.398286  |
| biological_process | regulation of multi-organism process                                                                   | GO:0043900 | 16417 | 120 | 1.110849409 | 0.0173882 | 0.05045045  | 0.0582521 | 1.010181925 | 0.423119    | 0.425225225 | -1        |
| biological_process | regulation of type I interferon production                                                             | GO:0032479 | 16511 | 26  | 1.238698934 | 0.0174413 | 0.027027027 | 0.0582135 | 1.127979401 | 0.128995    | 0.181981982 | 0.307691  |
| cellular_component | external encapsulating structure                                                                       | GO:0030312 | 16800 | 23  | 1.253680716 | 0.0174849 | 0.151351351 | 0.0424776 | 1.202232447 | 0.0463774   | 0.209009009 | 0.040789  |
| biological_process | negative regulation of peptidase activity                                                              | GO:0010466 | 16438 | 99  | 1.121848601 | 0.0175933 | 0.086486486 | 0.0589284 | 0.949542071 | 0.808473    | 0.872072072 | -1        |
| biological_process | regulation of protein deacetylation                                                                    | GO:0090311 | 16515 | 22  | 1.258868054 | 0.0176691 | 0.018018018 | 0.059631  | 1.328328151 | 0.00380218  | 0.034234234 | 0.0583342 |
| biological_process | regulation of protein depolymerization                                                                 | GO:1901879 | 16493 | 44  | 1.182833545 | 0.0177154 | 0.046846847 | 0.0595907 | 1.193074457 | 0.0131681   | 0.037837838 | 0.0984419 |
| cellular_component | microtubule                                                                                            | GO:0005874 | 16516 | 307 | 1.06857641  | 0.0178421 | 0.198198198 | 0.0422199 | 1.05977093  | 0.0335706   | 0.2         | 0.0352009 |
| biological_process | face development                                                                                       | GO:0060324 | 16499 | 38  | 1.196431967 | 0.017876  | 0.061261261 | 0.0595662 | 1.175825448 | 0.0309098   | 0.093693694 | 0.144102  |
| molecular_function | motor proximal region sequence-specific DNA binding transcription factor activity involved in negative | GO:0001078 | 16832 | 29  | 1.224803339 | 0.0179231 | 0.001801802 | 0.0787711 | 1.238901566 | 0.0128643   | 0.115315315 | 0.012374  |
| molecular_function | enhancer sequence-specific DNA binding                                                                 | GO:0001158 | 16841 | 20  | 1.270716031 | 0.0179422 | 0.052252252 | 0.0783352 | 1.334712039 | 0.00473981  | 0.005405405 | 0         |
| molecular_function | phosphoric diester hydrolase activity                                                                  | GO:0008081 | 16778 | 83  | 1.132638023 | 0.0179436 | 0.088288288 | 0.0778997 | 1.026463524 | 0.337751    | 0.387387387 | -1        |
| biological_process | regulation of transforming growth factor beta receptor signaling pathway                               | GO:0017015 | 16472 | 65  | 1.149888922 | 0.0179876 | 0.135135135 | 0.0595351 | 1.211273164 | 0.00155776  | 0.059459459 | 0.0442187 |
| biological_process | negative regulation of leukocyte proliferation                                                         | GO:0070664 | 16491 | 46  | 1.17823638  | 0.018009  | 0.027027027 | 0.0549914 | 0.951598162 | 0.715476    | 0.69009009  | -1        |
| biological_process | tissue homeostasis                                                                                     | GO:0001894 | 16436 | 101 | 1.119942309 | 0.0181204 | 0.064864865 | 0.0594603 | 1.04755672  | 0.203182    | 0.257657658 | 0.399356  |
| biological_process | odontogenesis                                                                                          | GO:0042476 | 16448 | 89  | 1.127772131 | 0.0181547 | 0.095495495 | 0.0594185 | 1.223481207 | 0.000125316 | 0.059459459 | 0.0082502 |
| biological_process | leukocyte differentiation                                                                              | GO:0005251 | 16228 | 309 | 1.06806646  | 0.0182189 | 0.084684685 | 0.059381  | 1.116033036 | 0.000181006 | 0.014414414 | 0.0130052 |
| biological_process | regulation of Notch signaling pathway                                                                  | GO:0008593 | 16501 | 36  | 1.201009071 | 0.0182538 | 0.012612613 | 0.0593394 | 1.181290109 | 0.0296424   | 0.068468468 | 0.143347  |
| biological_process | nuclear transport                                                                                      | GO:0051169 | 16179 | 358 | 1.063016687 | 0.018405  | 0.091891892 | 0.0593139 | 1.042694369 | 0.0786132   | 0.158558559 | 0.235416  |
| molecular_function | receptor signaling protein serine/threonine kinase activity                                            | GO:0004702 | 16814 | 47  | 1.175550964 | 0.0184214 | 0.055855585 | 0.0775862 | 1.15741878  | 0.0306111   | 0.064864865 | 0.0533448 |
| biological_process | regulation of CD4-positive, alpha-beta T cell activation                                               | GO:2000514 | 16511 | 26  | 1.236061845 | 0.0184672 | 0.054054054 | 0.0600093 | 1.056800435 | 0.307832    | 0.376576577 | -1        |
| biological_process | B cell receptor signaling pathway                                                                      | GO:0050853 | 16511 | 26  | 1.236052543 | 0.0184709 | 0.027027027 | 0.059631  | 0.967583696 | 0.612781    | 0.609090090 | 0.264144  |
| biological_process | astrocyte differentiation                                                                              | GO:0048708 | 16493 | 44  | 1.181310876 | 0.0184946 | 0.036036036 | 0.0599197 | 1.110229164 | 0.10238     | 0.084684685 | 0.264144  |
| biological_process | cellular membrane organization                                                                         | GO:0016044 | 16234 | 303 | 1.068521808 | 0.0185336 | 0.108108108 | 0.0598785 | 1.076787627 | 0.00972926  | 0.104504505 | 0.0799914 |
| biological_process | organic hydroxy compound biosynthetic process                                                          | GO:1901617 | 16472 | 135 | 1.103177938 | 0.0185406 | 0.068468468 | 0.059833  | 0.982342469 | 0.639442    | 0.161261261 | -1        |
| biological_process | regulation of stress fiber assembly                                                                    | GO:0051492 | 16499 | 38  | 1.194602044 | 0.0187547 | 0.046846847 | 0.0598161 | 1.079240548 | 0.198497    | 0.25045045  | 0.393845  |
| biological_process | regulation of T cell proliferation                                                                     | GO:0042129 | 16445 | 92  | 1.124774347 | 0.0188231 | 0.046846847 | 0.059779  | 1.025803006 | 0.333665    | 0.412612613 | -1        |
| biological_process | single organism reproductive process                                                                   | GO:0044702 | 15913 | 624 | 1.047096643 | 0.0188922 | 0.102702703 | 0.0597422 | 1.057564025 | 0.00556052  | 0.167557568 | 0.06362   |
| biological_process | regulation of peptidyl-tyrosine phosphorylation                                                        | GO:0050730 | 16397 | 140 | 1.100896828 | 0.0189237 | 0.066666667 | 0.0597002 | 1.086142879 | 0.0381172   | 0.14954955  | 0.16257   |
| biological_process | regulation of neuron death                                                                             | GO:1901214 | 16382 | 155 | 1.095747937 | 0.0190188 | 0.090909009 | 0.059667  | 1.056432681 | 0.110734    | 0.216216216 | 0.276374  |
| biological_process | regulation of cAMP metabolic process                                                                   | GO:0030814 | 16474 | 63  | 1.150585349 | 0.0190323 | 0.068468468 | 0.0596227 | 1.191032975 | 0.00425297  | 0.03963964  | 0.0578798 |
| biological_process | trabecula morphogenesis                                                                                | GO:0061383 | 16505 | 32  | 1.211373284 | 0.0190844 | 0.041441441 | 0.0595837 | 1.074094289 | 0.233722    | 0.306306306 | 0.433226  |
| biological_process | positive regulation of cell-cell adhesion                                                              | GO:0022409 | 16507 | 30  | 1.218260979 | 0.0191098 | 0.113513514 | 0.0595411 | 1.322719744 | 0.0010906   | 0.05045045  | 0.0406378 |
| biological_process | positive regulation of leukocyte differentiation                                                       | GO:1902107 | 16449 | 88  | 1.127078844 | 0.0192124 | 0.054054054 | 0.0602354 | 1.185209623 | 0.00127495  | 0.014414414 | 0.0441816 |
| biological_process | positive regulation of lipid metabolic process                                                         | GO:0045834 | 16458 | 79  | 1.134050241 | 0.019291  | 0.174774775 | 0.0601998 | 1.063533468 | 0.163446    | 0.299099099 | 0.355029  |
| biological_process | proteoglycan metabolic process                                                                         | GO:0006029 | 16487 | 50  | 1.168628856 | 0.0193011 | 0.136936937 | 0.060879  | 1.174673138 | 0.0160749   | 0.064864865 | 0.109119  |
| biological_process | regulation of lymphocyte differentiation                                                               | GO:0045619 | 16441 | 96  | 1.121468927 | 0.0193485 | 0.090909009 | 0.0608387 | 1.085837485 | 0.0720174   | 0.095495459 | 0.22475   |
| biological_process | positive regulation of cell cycle                                                                      | GO:0045787 | 16439 | 98  | 1.120001933 | 0.0195223 | 0.093693694 | 0.0615385 | 1.087680469 | 0.0657959   | 0.203603604 | 0.218361  |
| cellular_component | protein-DNA complex                                                                                    | GO:0032993 | 16709 | 114 | 1.111153419 | 0.0195731 | 0.383783784 | 0.0421216 | 0.91446479  | 0.943775    | 0.682882883 | -1        |
| molecular_function | ligand-dependent nuclear receptor transcription coactivator activity                                   | GO:0030374 | 16823 | 38  | 1.192590966 | 0.0195794 | 0.064864865 | 0.0774418 | 1.276130888 | 0.00158035  | 0.001801802 | 0         |
| biological_process | regulation of myoblast differentiation                                                                 | GO:0045661 | 16512 | 25  | 1.237933718 | 0.0195976 | 0.043243243 | 0.0615018 | 1.165179818 | 0.0761334   | 0.140540541 | 0.230402  |
| biological_process | negative regulation of blood pressure                                                                  | GO:0045776 | 16506 | 31  | 1.213525958 | 0.0196464 | 0.091891892 | 0.0614614 | 1.15539181  | 0.0668149   | 0.147747748 | 0.219033  |
| biological_process | camera-type eye morphogenesis                                                                          | GO:0048593 | 16460 | 77  | 1.135268786 | 0.0196657 | 0.163963964 | 0.0614169 | 1.112536334 | 0.0432291   | 0.261261261 | 0.174458  |
| biological_process | sarcomere organization                                                                                 | GO:0045214 | 16514 | 23  | 1.247597291 | 0.0197886 | 0.036036036 | 0.061387  | 1.227280378 | 0.0294293   | 0.118918919 | 0.143152  |
| biological_process | ribonucleoside triphosphate metabolic process                                                          | GO:0009199 | 15967 | 570 | 1.048900963 | 0.0198027 | 0.165765766 | 0.0613419 | 1.046299821 | 0.0256855   | 0.122522523 | 0.137155  |
| molecular_function | Rab GTPase activator activity                                                                          | GO:0005097 | 16818 | 43  | 1.180844983 | 0.0198592 | 0.140540541 | 0.0770837 | 1.164162353 | 0.030955    | 0.156756757 | 0.0528366 |
| biological_process | positive regulation of nucleotide metabolic process                                                    | GO:0045981 | 16478 | 59  | 1.154226969 | 0.0199142 | 0.041441441 | 0.0612635 | 1.146618375 | 0.0253438   | 0.090909009 | 0.135762  |
| biological_process | positive regulation of purine nucleotide metabolic process                                             | GO:1900544 | 16478 | 59  | 1.154226969 | 0.0199142 | 0.041441441 | 0.0612635 | 1.146618375 | 0.0253438   | 0.090909009 | 0.135762  |
| biological_process | positive regulation of vasoconstriction                                                                | GO:0045907 | 16514 | 23  | 1.247197683 | 0.0199485 | 0.066666667 | 0.0612214 | 1.028980153 | 0.404835    | 0.338738739 | -1        |
| biological_process | macromolecular complex disassembly                                                                     | GO:0032984 | 16449 | 88  | 1.126123741 | 0.0199524 | 0.054054054 | 0.0611751 | 1.134321142 | 0.0143245   | 0.027027027 | 0.10128   |

|                    |                                                                                                          |            |       |     |             |           |             |           |             |             |             |           |
|--------------------|----------------------------------------------------------------------------------------------------------|------------|-------|-----|-------------|-----------|-------------|-----------|-------------|-------------|-------------|-----------|
| biological_process | ribonucleoside catabolic process                                                                         | GO:0042454 | 16025 | 512 | 1.051367671 | 0.0204269 | 0.196396396 | 0.0615356 | 1.060253486 | 0.00822539  | 0.108108108 | 0.0776062 |
| biological_process | macroautophagy                                                                                           | GO:0016236 | 16487 | 50  | 1.166669725 | 0.0204584 | 0.113513514 | 0.0614932 | 1.032556329 | 0.344839    | 0.293693694 | -1        |
| biological_process | regulation of astrocyte differentiation                                                                  | GO:0048710 | 16513 | 24  | 1.240112747 | 0.0207295 | 0.025225225 | 0.0636165 | 1.056076381 | 0.31699     | 0.333333333 | -1        |
| biological_process | positive regulation of cell cycle process                                                                | GO:0090068 | 16446 | 91  | 1.123018449 | 0.0207648 | 0.010810811 | 0.0635734 | 1.083228502 | 0.083958    | 0.126126126 | 0.244166  |
| biological_process | forelimb morphogenesis                                                                                   | GO:0035136 | 16507 | 30  | 1.214330624 | 0.0209169 | 0.045045045 | 0.063547  | 1.075853123 | 0.235692    | 0.282882883 | 0.434952  |
| biological_process | regulation of striated muscle contraction                                                                | GO:0006942 | 16493 | 44  | 1.176866551 | 0.0209379 | 0.079279279 | 0.063502  | 1.211426192 | 0.00750057  | 0.030630631 | 0.0767597 |
| molecular_function | laminin binding                                                                                          | GO:0043236 | 16841 | 20  | 1.262472638 | 0.0209585 | 0.048648649 | 0.0765066 | 1.457930005 | 0.000193135 | 0.007072707 | 0         |
| biological_process | regulation of neural precursor cell proliferation                                                        | GO:2000177 | 16488 | 49  | 1.167450021 | 0.0210143 | 0.095495495 | 0.0634649 | 1.089106996 | 0.139639    | 0.234234234 | 0.326736  |
| molecular_function | thyroid hormone receptor binding                                                                         | GO:0046966 | 16839 | 22  | 1.250105932 | 0.0210147 | 0.014414414 | 0.0761041 | 1.109876601 | 0.185869    | 0.072072072 | 0.341376  |
| biological_process | positive regulation of protein polymerization                                                            | GO:0032273 | 16489 | 48  | 1.169169834 | 0.0210267 | 0.10990991  | 0.0634187 | 1.115323967 | 0.0828914   | 0.097297297 | 0.243318  |
| biological_process | ventral spinal cord development                                                                          | GO:0021517 | 16507 | 30  | 1.214044414 | 0.021054  | 0.037837838 | 0.0633748 | 1.289801507 | 0.00296326  | 0.003603604 | 0.0574359 |
| molecular_function | sialyltransferase activity                                                                               | GO:0008373 | 16841 | 20  | 1.262176113 | 0.0210746 | 0.048648649 | 0.0757067 | 1.090043397 | 0.242626    | 0.295495495 | 0.433027  |
| biological_process | regulation of megakaryocyte differentiation                                                              | GO:0045652 | 16514 | 23  | 1.244410943 | 0.0210946 | 0.427027027 | 0.0633328 | 0.663007554 | 0.997455    | 0.803603604 | -1        |
| biological_process | antigen processing and presentation of exogenous antigen                                                 | GO:0019884 | 16512 | 25  | 1.234315372 | 0.0211391 | 0.041441441 | 0.0632913 | 1.058419276 | 0.306333    | 0.432432432 | -1        |
| biological_process | hippo signaling cascade                                                                                  | GO:0035329 | 16516 | 21  | 1.255663565 | 0.0211497 | 0.138738739 | 0.0632452 | 1.071469553 | 0.285154    | 0.371711717 | -1        |
| biological_process | positive regulation of cell growth                                                                       | GO:0030307 | 16455 | 82  | 1.129122488 | 0.0211662 | 0.131531532 | 0.0631999 | 1.034376592 | 0.294437    | 0.345945946 | -1        |
| biological_process | cytokine production involved in immune response                                                          | GO:0002367 | 16498 | 39  | 1.187444824 | 0.0211822 | 0.048648649 | 0.0631547 | 1.008015966 | 0.465432    | 0.517171717 | -1        |
| biological_process | nucleoside catabolic process                                                                             | GO:0009164 | 16023 | 514 | 1.050841241 | 0.0212741 | 0.201801802 | 0.0631202 | 1.058167865 | 0.010158    | 0.115315315 | 0.0802423 |
| biological_process | type I interferon production                                                                             | GO:0032606 | 16506 | 31  | 1.209909641 | 0.0213722 | 0.016216216 | 0.0630866 | 1.048439334 | 0.32006     | 0.345945946 | -1        |
| molecular_function | ion channel activity                                                                                     | GO:0005216 | 16505 | 356 | 1.06134265  | 0.0213728 | 0.263063063 | 0.0753688 | 1.093437308 | 0.00101295  | 0.187387387 | 0         |
| biological_process | regulation of bone resorption                                                                            | GO:0045124 | 16513 | 24  | 1.238394476 | 0.0214687 | 0.014414414 | 0.0637556 | 1.186795966 | 0.0563514   | 0.084684685 | 0.196996  |
| biological_process | erythrocyte development                                                                                  | GO:0048821 | 16517 | 20  | 1.261033322 | 0.0215271 | 0.001801802 | 0.0637161 | 1.216499374 | 0.0466728   | 0.027027027 | 0.179575  |
| molecular_function | p53 binding                                                                                              | GO:0002039 | 16818 | 43  | 1.177579071 | 0.0217164 | 0.052252252 | 0.0750443 | 1.255458927 | 0.00183495  | 0.003603604 | 0         |
| biological_process | rhythmic behavior                                                                                        | GO:0007622 | 16511 | 26  | 1.228191832 | 0.0218516 | 0.115315315 | 0.0637144 | 1.135588941 | 0.115378    | 0.124324324 | 0.283497  |
| biological_process | regulation of osteoclast differentiation                                                                 | GO:0045670 | 16502 | 35  | 1.196293029 | 0.022029  | 0.064864865 | 0.0636918 | 0.97861527  | 0.586838    | 0.567567568 | -1        |
| biological_process | regulation of leukocyte chemotaxis                                                                       | GO:0002688 | 16488 | 49  | 1.165759413 | 0.0220734 | 0.037837838 | 0.0636504 | 1.14820177  | 0.03597     | 0.054054054 | 0.157464  |
| biological_process | body morphogenesis                                                                                       | GO:0010171 | 16494 | 43  | 1.176839769 | 0.0221558 | 0.115315315 | 0.0636144 | 1.19465363  | 0.0134238   | 0.07027027  | 0.0996763 |
| biological_process | cell maturation                                                                                          | GO:0048469 | 16431 | 106 | 1.112296244 | 0.0222706 | 0.034234234 | 0.0635831 | 1.182666146 | 0.000541836 | 0.005405405 | 0.0279335 |
| biological_process | regulation of immunoglobulin production                                                                  | GO:0002637 | 16510 | 27  | 1.223010103 | 0.0222806 | 0.041441441 | 0.0635372 | 0.984031066 | 0.557207    | 0.565765766 | -1        |
| biological_process | immune response based on somatic recombination of immune receptors built from immunoglobulin superfamily | GO:0002460 | 16388 | 149 | 1.094542053 | 0.0223259 | 0.059459459 | 0.0634959 | 0.957797344 | 0.814961    | 0.821621622 | -1        |
| biological_process | eye morphogenesis                                                                                        | GO:0048592 | 16423 | 114 | 1.108116194 | 0.0224085 | 0.205405405 | 0.0634601 | 1.095789412 | 0.0377436   | 0.282882883 | 0.161257  |
| molecular_function | ATPase activity, coupled to transmembrane movement of substances                                         | GO:0042626 | 16758 | 103 | 1.11372572  | 0.0224662 | 0.165765766 | 0.0748156 | 1.046004034 | 0.208637    | 0.306306306 | 0.380108  |
| biological_process | neuron death                                                                                             | GO:0070997 | 16361 | 176 | 1.08657832  | 0.0227469 | 0.099099099 | 0.064159  | 1.054633877 | 0.103452    | 0.228828829 | 0.265123  |
| molecular_function | RNA polymerase II activating transcription factor binding                                                | GO:0001102 | 16834 | 27  | 1.221818852 | 0.0228582 | 0.052252252 | 0.0745068 | 1.300514369 | 0.00339624  | 0.041441441 | 0         |
| biological_process | microtubule-based process                                                                                | GO:0007017 | 16134 | 403 | 1.056753171 | 0.0228707 | 0.203603604 | 0.0641288 | 1.016199767 | 0.28428     | 0.331531532 | -1        |
| biological_process | embryonic digit morphogenesis                                                                            | GO:0042733 | 16495 | 42  | 1.177738873 | 0.0228772 | 0.070207027 | 0.0640819 | 1.067864568 | 0.222817    | 0.311711712 | 0.421497  |
| biological_process | catecholamine secretion                                                                                  | GO:0050432 | 16501 | 36  | 1.19180465  | 0.022996  | 0.176576577 | 0.0640511 | 1.131871771 | 0.0850425   | 0.196396396 | 0.243594  |
| biological_process | L-amino acid transport                                                                                   | GO:0015807 | 16505 | 32  | 1.203421873 | 0.0230185 | 0.147747748 | 0.0640066 | 1.016174457 | 0.436999    | 0.436036036 | -1        |
| biological_process | regulation of peptidyl-threonine phosphorylation                                                         | GO:0010799 | 16517 | 20  | 1.257187621 | 0.0231101 | 0.016216216 | 0.0646677 | 1.166154546 | 0.0989092   | 0.082882883 | 0.261982  |
| biological_process | cytokine biosynthetic process                                                                            | GO:0042089 | 16455 | 82  | 1.1267687   | 0.0231183 | 0.064864865 | 0.0646208 | 0.970117865 | 0.680796    | 0.614414414 | -1        |
| biological_process | positive regulation of alpha-beta T cell differentiation                                                 | GO:0046638 | 16506 | 31  | 1.206453269 | 0.0231398 | 0.037837838 | 0.0645759 | 1.270688733 | 0.00448891  | 0.03963964  | 0.0572096 |
| biological_process | cell differentiation in spinal cord                                                                      | GO:0021515 | 16500 | 37  | 1.188738809 | 0.023256  | 0.03963964  | 0.0645445 | 1.211742418 | 0.0127629   | 0.018018018 | 0.09639   |
| biological_process | positive regulation of protein binding                                                                   | GO:0032092 | 16497 | 40  | 1.181449675 | 0.0232905 | 0.052252252 | 0.0645016 | 1.097279606 | 0.143006    | 0.174774775 | 0.334014  |
| biological_process | steroid metabolic process                                                                                | GO:0008202 | 16334 | 203 | 1.080143242 | 0.0232971 | 0.084684685 | 0.0644547 | 1.019849    | 0.311088    | 0.389189189 | -1        |
| molecular_function | neurotransmitter binding                                                                                 | GO:0042165 | 16841 | 20  | 1.256884472 | 0.0233242 | 0.154954955 | 0.0742173 | 1.109489502 | 0.198051    | 0.297297297 | 0.373407  |
| molecular_function | phosphatidylinositol binding                                                                             | GO:0035091 | 16723 | 138 | 1.097348482 | 0.023349  | 0.230630631 | 0.0738315 | 1.138225946 | 0.00236999  | 0.104050405 | 0         |
| cellular_component | collagen                                                                                                 | GO:0005581 | 16747 | 76  | 1.131402802 | 0.0233686 | 0.196396396 | 0.048958  | 1.10911164  | 0.0493374   | 0.142342342 | 0.0533491 |
| cellular_component | cell division site                                                                                       | GO:0032153 | 16785 | 38  | 1.185928634 | 0.0234359 | 0.016216216 | 0.0482913 | 1.178949253 | 0.0278836   | 0.054054054 | 0.0151244 |
| cellular_component | cell division site part                                                                                  | GO:0032155 | 16785 | 38  | 1.185928634 | 0.0234359 | 0.016216216 | 0.0482913 | 1.178949253 | 0.0278836   | 0.054054054 | 0.0151244 |
| biological_process | glucose metabolic process                                                                                | GO:0006006 | 16368 | 169 | 1.087797825 | 0.0234568 | 0.068468468 | 0.0644297 | 1.016575565 | 0.353808    | 0.392792793 | -1        |
| biological_process | negative regulation of mononuclear cell proliferation                                                    | GO:0032945 | 16493 | 44  | 1.172534915 | 0.0235768 | 0.034234234 | 0.0650429 | 0.951511524 | 0.711544    | 0.681081081 | -1        |
| biological_process | negative regulation of lymphocyte proliferation                                                          | GO:0050672 | 16493 | 44  | 1.172534915 | 0.0235768 | 0.034234234 | 0.0650429 | 0.951511524 | 0.711544    | 0.681081081 | -1        |
| molecular_function | ATPase activity, coupled to movement of substances                                                       | GO:0043492 | 16757 | 104 | 1.112007226 | 0.023594  | 0.167567568 | 0.0734983 | 1.051837758 | 0.179184    | 0.288288288 | 0.335388  |
| biological_process | cellular response to lipopolysaccharide                                                                  | GO:0071222 | 16446 | 91  | 1.119781139 | 0.0235965 | 0.113513514 | 0.0649977 | 1.0092541   | 0.439095    | 0.43963964  | -1        |
| biological_process | regulation of protein binding                                                                            | GO:0043393 | 16443 | 94  | 1.117811048 | 0.0236269 | 0.003603604 | 0.064954  | 1.132176464 | 0.0130088   | 0.007207207 | 0.0989108 |
| biological_process | glycosyl compound catabolic process                                                                      | GO:1901658 | 16020 | 517 | 1.049576198 | 0.0236477 | 0.2         | 0.0649091 | 1.056907091 | 0.011394    | 0.113513514 | 0.0890944 |
| biological_process | regulation of interferon-beta production                                                                 | GO:0032648 | 16514 | 23  | 1.238474661 | 0.0237227 | 0.03963964  | 0.0648719 | 1.1667976   | 0.0828006   | 0.133333333 | 0.243734  |
| biological_process | regulation of neuron apoptotic process                                                                   | GO:0043523 | 16388 | 149 | 1.093284015 | 0.0237854 | 0.106306306 | 0.064833  | 1.043433231 | 0.178162    | 0.264864865 | 0.372814  |
| biological_process | regulation of CD4-positive, alpha-beta T cell differentiation                                            | GO:0043370 | 16512 | 25  | 1.228462166 | 0.0238494 | 0.054054054 | 0.0647943 | 1.068384238 | 0.276711    | 0.347747748 | 0.494391  |
| biological_process | cellular response to molecule of bacterial origin                                                        | GO:0071219 | 16439 | 98  | 1.1151093   | 0.0238915 | 0.082882883 | 0.0654403 | 1.008182401 | 0.444072    | 0.443243243 | -1        |
| molecular_function | peptide hormone binding                                                                                  | GO:0017046 | 16829 | 32  | 1.201796968 | 0.0239018 | 0.140540541 | 0.0731818 | 1.075336503 | 0.230001    | 0.29009009  | 0.406719  |
| biological_process | cellular response to biotic stimulus                                                                     | GO:0071216 | 16427 | 110 | 1.10856907  | 0.0239187 | 0.064864865 | 0.0653961 | 1.002403303 | 0.825508    | 0.477477477 | -1        |
| biological_process | protein secretion                                                                                        | GO:0009306 | 16392 | 145 | 1.09436103  | 0.0240379 | 0.093693694 | 0.0653651 | 0.994711407 | 0.54412     | 0.594594595 | -1        |
| biological_process | myeloid leukocyte differentiation                                                                        | GO:0002573 | 16418 | 119 | 1.104239281 | 0.0240385 | 0.045045045 | 0.0653172 | 1.125041963 | 0.00886813  | 0.061261261 | 0.0773148 |
| biological_process | negative regulation of immune response                                                                   | GO:0050777 | 16486 | 51  | 1.159498671 | 0.024081  | 0.108108108 | 0.0652753 | 0.957787859 | 0.699517    | 0.646846847 | -1        |
| biological_process | antigen processing and presentation                                                                      | GO:0019882 | 16470 | 67  | 1.138985368 | 0.024165  | 0.144144144 | 0.0652394 | 0.979940902 | 0.61219     | 0.565765766 | -1        |
| biological_process | positive regulation of secretion                                                                         | GO:0051047 | 16334 | 203 | 1.079481977 | 0.0242131 | 0.144144144 | 0.0651985 | 1.047622121 | 0.118519    | 0.252252252 | 0.290867  |
| biological_process | calcium ion transport into cytosol                                                                       | GO:0060402 | 16473 | 64  | 1.142140454 | 0.0242266 | 0.165765766 | 0.0651526 | 1.135710166 | 0.029776    | 0.201801802 | 0.143154  |
| biological_process | positive regulation of lymphocyte proliferation                                                          | GO:0050671 | 16452 | 85  | 1.123202344 | 0.0242792 | 0.05045045  | 0.0657959 | 1.075925683 | 0.112082    | 0.145945946 | 0.277872  |
| biological_process | positive regulation of ossification                                                                      | GO:0045778 | 16499 | 38  | 1.1844595   | 0.0243187 | 0.106306306 | 0.0657535 | 1.131579514 | 0.0797898   | 0.266666667 | 0.23665   |
| biological_process | microtubule depolymerization                                                                             | GO:0007019 | 16513 | 24  | 1.231496199 | 0.0246643 | 0.072072072 | 0.0664368 | 1.262687095 | 0.0128537   | 0.018018018 | 0.0981208 |
| biological_process | epidermis morphogenesis                                                                                  | GO:0048730 | 16503 | 34  | 1.194422515 | 0.0246727 | 0.100900901 | 0.0636896 | 1.259940292 | 0.00429455  | 0.025225225 | 0.0577269 |
| biological_process | regulation of cardiac muscle cell membrane potential                                                     | GO:0086036 | 16512 | 25  | 1.226411125 | 0.0248658 | 0.11        |           |             |             |             |           |

|                    |                                                                                                |            |       |     |             |           |             |           |             |             |             |           |
|--------------------|------------------------------------------------------------------------------------------------|------------|-------|-----|-------------|-----------|-------------|-----------|-------------|-------------|-------------|-----------|
| biological_process | regulation of vascular endothelial growth factor receptor signaling pathway                    | GO:0030947 | 16513 | 24  | 1.229369776 | 0.0257264 | 0.045045045 | 0.0701594 | 1.228503082 | 0.0261702   | 0.068468468 | 0.137242  |
| molecular_function | hydrolase activity, acting on acid anhydrides, catalyzing transmembrane movement of substances | GO:0016820 | 16757 | 104 | 1.109859702 | 0.025794  | 0.18018018  | 0.0870812 | 1.044292339 | 0.21629     | 0.317117117 | 0.393638  |
| biological_process | cellular response to acid                                                                      | GO:0071229 | 16495 | 42  | 1.17319233  | 0.0257943 | 0.043243243 | 0.0701189 | 1.001016855 | 0.495462    | 0.482882883 | -1        |
| biological_process | membrane budding                                                                               | GO:0006900 | 16516 | 21  | 1.244577947 | 0.0260374 | 0.100900901 | 0.0707764 | 1.264537817 | 0.0178185   | 0.142342342 | 0.114416  |
| biological_process | long-term synaptic potentiation                                                                | GO:0060291 | 16516 | 21  | 1.244013588 | 0.0263097 | 0.156756757 | 0.0714371 | 1.275231839 | 0.0144084   | 0.124324324 | 0.100898  |
| biological_process | positive regulation of leukocyte mediated cytotoxicity                                         | GO:0001912 | 16510 | 27  | 1.215135955 | 0.0263233 | 0.016216216 | 0.0713877 | 1.002054712 | 0.492637    | 0.511717117 | -1        |
| cellular_component | melanosome                                                                                     | GO:0042470 | 16738 | 85  | 1.120944072 | 0.0264182 | 0.158558559 | 0.0480101 | 0.984623337 | 0.597234    | 0.511717112 | -1        |
| cellular_component | pigment granule                                                                                | GO:0048770 | 16738 | 85  | 1.120944072 | 0.0264182 | 0.158558559 | 0.0480101 | 0.984623337 | 0.597234    | 0.511717112 | -1        |
| biological_process | mononuclear cell proliferation                                                                 | GO:0032943 | 16371 | 166 | 1.086315226 | 0.0264431 | 0.036036036 | 0.0713546 | 1.057240067 | 0.0996044   | 0.048648649 | 0.26271   |
| biological_process | oogenesis                                                                                      | GO:0048477 | 16482 | 55  | 1.150436424 | 0.0264579 | 0.138738739 | 0.0713054 | 1.185311593 | 0.00855475  | 0.037837838 | 0.0770522 |
| biological_process | monoamine transport                                                                            | GO:0015844 | 16479 | 58  | 1.146475247 | 0.0264625 | 0.145945946 | 0.0712548 | 1.093839763 | 0.107491    | 0.167567568 | 0.271889  |
| biological_process | regulation of sensory perception of pain                                                       | GO:0051930 | 16514 | 23  | 1.23282231  | 0.0264757 | 0.041441441 | 0.0711544 | 1.079088896 | 0.255466    | 0.324324324 | 0.466515  |
| biological_process | regulation of sensory perception                                                               | GO:0051931 | 16514 | 23  | 1.23282231  | 0.0264757 | 0.041441441 | 0.0711544 | 1.079088896 | 0.255466    | 0.324324324 | 0.466515  |
| biological_process | triglyceride metabolic process                                                                 | GO:0006641 | 16476 | 61  | 1.142705442 | 0.0265536 | 0.061261261 | 0.0711151 | 1.040202967 | 0.292939    | 0.261261261 | -1        |
| biological_process | positive regulation of adaptive immune response                                                | GO:0002821 | 16486 | 51  | 1.156081692 | 0.0265809 | 0.054054054 | 0.0710682 | 0.951961685 | 0.724142    | 0.736936937 | -1        |
| cellular_component | extrinsic to plasma membrane                                                                   | GO:0019897 | 16741 | 82  | 1.122828909 | 0.0267264 | 0.030630631 | 0.0477218 | 0.962523568 | 0.722216    | 0.778378378 | -1        |
| biological_process | positive regulation of cell activation                                                         | GO:0050867 | 16364 | 173 | 1.084183868 | 0.0269286 | 0.077477477 | 0.0717363 | 1.145280008 | 0.000438803 | 0.003603604 | 0.0200581 |
| molecular_function | glutamate receptor activity                                                                    | GO:0008066 | 16835 | 26  | 1.218124371 | 0.0269313 | 0.21981982  | 0.0869261 | 1.233470676 | 0.0195286   | 0.185585586 | 0.0345204 |
| biological_process | morphogenesis of an epithelial fold                                                            | GO:0060571 | 16512 | 25  | 1.222362255 | 0.026979  | 0.009090909 | 0.0723576 | 1.029298367 | 0.399794    | 0.412612613 | -1        |
| biological_process | prostate gland morphogenesis                                                                   | GO:0060512 | 16509 | 28  | 1.210013856 | 0.0270246 | 0.142342342 | 0.0723128 | 1.160322936 | 0.0706971   | 0.221621622 | 0.22099   |
| biological_process | regulation of smooth muscle contraction                                                        | GO:0006940 | 16496 | 41  | 1.173331242 | 0.027132  | 0.117117117 | 0.0722776 | 1.018385282 | 0.419134    | 0.418018018 | -1        |
| biological_process | regulation of endocytosis                                                                      | GO:0030100 | 16421 | 116 | 1.102803475 | 0.0271486 | 0.135135135 | 0.0722284 | 1.152073658 | 0.00220706  | 0.027027027 | 0.0499631 |
| biological_process | purine nucleoside catabolic process                                                            | GO:0006152 | 16029 | 508 | 1.048507372 | 0.0272192 | 0.121621613 | 0.0721361 | 1.060131797 | 0.00855709  | 0.108108108 | 0.0768706 |
| biological_process | purine ribonucleoside catabolic process                                                        | GO:0046130 | 16029 | 508 | 1.048507372 | 0.0272192 | 0.121621613 | 0.0721361 | 1.060131797 | 0.00855709  | 0.108108108 | 0.0768706 |
| biological_process | establishment of spindle localization                                                          | GO:0051293 | 16517 | 20  | 1.247924076 | 0.0273295 | 0.036036036 | 0.0721015 | 1.244562111 | 0.0290119   | 0.077477477 | 0.142759  |
| biological_process | immunoglobulin production                                                                      | GO:0002377 | 16479 | 58  | 1.145257567 | 0.0274642 | 0.052252252 | 0.0720706 | 1.010105473 | 0.446907    | 0.407207207 | -1        |
| biological_process | chemokine production                                                                           | GO:0032602 | 16492 | 45  | 1.16486324  | 0.0275462 | 0.061261261 | 0.0720317 | 0.962508395 | 0.668681    | 0.726126126 | -1        |
| biological_process | cell-type specific apoptotic process                                                           | GO:0097285 | 16275 | 262 | 1.06787037  | 0.0275523 | 0.126126126 | 0.0719813 | 1.06064664  | 0.0432772   | 0.151351351 | 0.174085  |
| biological_process | nucleobase-containing compound catabolic process                                               | GO:0034655 | 15855 | 682 | 1.041498927 | 0.0276216 | 0.171717171 | 0.0719406 | 1.057562581 | 0.00391789  | 0.054054054 | 0.0592178 |
| biological_process | regulation of ERBB signaling pathway                                                           | GO:1901184 | 16503 | 34  | 1.1895567   | 0.0276571 | 0.102702703 | 0.0718948 | 1.195023628 | 0.0243236   | 0.136936937 | 0.133897  |
| biological_process | regulation of epidermal growth factor receptor signaling pathway                               | GO:0042058 | 16504 | 33  | 1.19235435  | 0.0276944 | 0.104504505 | 0.0718493 | 1.172422226 | 0.0249632   | 0.176576577 | 0.174128  |
| biological_process | neural tube patterning                                                                         | GO:0021532 | 16508 | 29  | 1.205003137 | 0.0278215 | 0.043243243 | 0.0718175 | 1.172592823 | 0.0535632   | 0.03963964  | 0.18999   |
| biological_process | positive regulation of alpha-beta T cell activation                                            | GO:0046635 | 16493 | 44  | 1.166293022 | 0.0278692 | 0.068468468 | 0.0717737 | 1.182204138 | 0.018034    | 0.091891892 | 0.1155006 |
| biological_process | covalent chromatin modification                                                                | GO:0016569 | 16253 | 284 | 1.064930397 | 0.0279555 | 0.306360306 | 0.0717358 | 1.168946419 | 3.27E-07    | 0.016216216 | 0         |
| molecular_function | ATPase activity, coupled to transmembrane movement of ions, phosphorylative mechanism          | GO:0015662 | 16808 | 583 | 1.0015662   | 0.0281972 | 0.127927928 | 0.068042  | 1.027791179 | 0.362804    | 0.423423423 | -1        |
| biological_process | smoothened signaling pathway                                                                   | GO:0007224 | 16453 | 84  | 1.119749576 | 0.0283381 | 0.135135135 | 0.0730596 | 1.125239116 | 0.0231216   | 0.063603063 | 0.130009  |
| molecular_function | lipid transporter activity                                                                     | GO:0005319 | 16802 | 59  | 1.142724618 | 0.028573  | 0.018018018 | 0.0864578 | 1.029614936 | 0.346539    | 0.378378378 | -1        |
| biological_process | embryonic cranial skeleton morphogenesis                                                       | GO:0048701 | 16504 | 33  | 1.19087016  | 0.0286489 | 0.084684685 | 0.0737126 | 1.126302393 | 0.104208    | 0.201801802 | 0.266138  |
| biological_process | neurotrophin signaling pathway                                                                 | GO:0038179 | 16517 | 20  | 1.245070033 | 0.0287523 | 0.100900901 | 0.0736243 | 1.172582189 | 0.0905115   | 0.126126126 | 0.250444  |
| biological_process | neurotrophin TRK receptor signaling pathway                                                    | GO:0048011 | 16517 | 20  | 1.245070033 | 0.0287523 | 0.100900901 | 0.0736243 | 1.172582189 | 0.0905115   | 0.126126126 | 0.250444  |
| biological_process | adaptive immune response                                                                       | GO:0002250 | 16376 | 161 | 1.085979881 | 0.0287907 | 0.068468468 | 0.0735782 | 0.960125887 | 0.810771    | 0.809009009 | -1        |
| biological_process | positive regulation of lymphocyte differentiation                                              | GO:0045621 | 16477 | 60  | 1.141008335 | 0.029029  | 0.041441441 | 0.073563  | 1.183738351 | 0.00676319  | 0.018018018 | 0.0707154 |
| biological_process | positive regulation of cytokine production                                                     | GO:0001819 | 16376 | 161 | 1.085716981 | 0.0291179 | 0.066666667 | 0.0735341 | 1.006306153 | 0.444655    | 0.441441441 | -1        |
| biological_process | sequestering of metal ion                                                                      | GO:0051238 | 16479 | 58  | 1.143201689 | 0.0292272 | 0.108108108 | 0.0734896 | 1.057248885 | 0.224688    | 0.333333333 | 0.423655  |
| biological_process | macrophage activation                                                                          | GO:0042116 | 16504 | 33  | 1.189734113 | 0.0293979 | 0.025225225 | 0.073464  | 1.078328239 | 0.217665    | 0.216216216 | 0.416722  |
| biological_process | Wnt receptor signaling pathway, planar cell polarity pathway                                   | GO:0060071 | 16510 | 27  | 1.209747673 | 0.0294276 | 0.135135135 | 0.073365  | 1.206262982 | 0.0315927   | 0.136936937 | 0.148832  |
| biological_process | regulation of establishment of planar polarity                                                 | GO:0090175 | 16510 | 27  | 1.209747673 | 0.0294276 | 0.135135135 | 0.073365  | 1.206262982 | 0.0315927   | 0.136936937 | 0.148832  |
| biological_process | osteoblast proliferation                                                                       | GO:0033687 | 16516 | 21  | 1.237845954 | 0.0294429 | 0.095495495 | 0.0733156 | 1.025929261 | 0.418437    | 0.412612613 | -1        |
| biological_process | long-chain fatty acid metabolic process                                                        | GO:0001676 | 16502 | 35  | 1.183871379 | 0.0296396 | 0.120720721 | 0.0732941 | 1.026577697 | 0.392586    | 0.401801802 | -1        |
| biological_process | response to retinoic acid                                                                      | GO:0032526 | 16452 | 85  | 1.117731858 | 0.0297241 | 0.097297297 | 0.0739078 | 1.031412009 | 0.307534    | 0.335135135 | -1        |
| cellular_component | transcription factor complex                                                                   | GO:0050667 | 16528 | 295 | 1.062792224 | 0.0297365 | 0.108108108 | 0.0542293 | 1.097492469 | 0.00171577  | 0.041441441 | 0         |
| biological_process | leukocyte proliferation                                                                        | GO:0070661 | 16365 | 172 | 1.082471869 | 0.0298419 | 0.057657658 | 0.0745251 | 1.048054894 | 0.136252    | 0.084684685 | 0.318737  |
| biological_process | negative regulation of phosphatase activity                                                    | GO:0010923 | 16477 | 60  | 1.13996024  | 0.0299743 | 0.230630631 | 0.0751433 | 1.225117938 | 0.00123992  | 0.054054054 | 0.0410972 |
| biological_process | response to virus                                                                              | GO:0009615 | 16380 | 157 | 1.086264693 | 0.0299826 | 0.084684685 | 0.0750918 | 0.905002332 | 0.980851    | 0.96036036  | -1        |
| biological_process | regulation of endothelial cell proliferation                                                   | GO:0001936 | 16470 | 67  | 1.132352047 | 0.0300392 | 0.088288288 | 0.0750548 | 1.187153203 | 0.00392147  | 0.032432432 | 0.0591333 |
| biological_process | catecholamine transport                                                                        | GO:0051937 | 16492 | 45  | 1.161444839 | 0.0301651 | 0.209090909 | 0.0750151 | 1.11318142  | 0.0939489   | 0.223423423 | 0.254838  |
| biological_process | cellular pigmentation                                                                          | GO:0033059 | 16517 | 20  | 1.242215991 | 0.0302362 | 0.059459459 | 0.0749736 | 1.106473613 | 0.204625    | 0.218018018 | 0.402001  |
| molecular_function | signaling adaptor activity                                                                     | GO:0035591 | 16833 | 28  | 1.204624015 | 0.0302592 | 0.059459459 | 0.0910648 | 1.025374701 | 0.407983    | 0.412612613 | -1        |
| biological_process | regulation of cytokine biosynthetic process                                                    | GO:0042035 | 16464 | 73  | 1.126490345 | 0.0303262 | 0.093693694 | 0.0749352 | 0.962174161 | 0.712631    | 0.634234234 | -1        |
| biological_process | lung alveolus development                                                                      | GO:0048286 | 16498 | 39  | 1.173162207 | 0.0303794 | 0.052252252 | 0.074891  | 1.132088057 | 0.0762976   | 0.198198198 | 0.231166  |
| biological_process | regulation of vesicle-mediated transport                                                       | GO:0060627 | 16328 | 209 | 1.074327965 | 0.030533  | 0.223423423 | 0.0748625 | 1.122898303 | 0.00097737  | 0.023423423 | 0.0372479 |
| biological_process | osteoclast differentiation                                                                     | GO:0030316 | 16484 | 53  | 1.148209081 | 0.0306143 | 0.064864865 | 0.0748228 | 1.038448918 | 0.31364     | 0.340540541 | -1        |
| biological_process | neuron apoptotic process                                                                       | GO:0051402 | 16373 | 164 | 1.083907917 | 0.0307061 | 0.106360306 | 0.0747848 | 1.030379871 | 0.249152    | 0.315315315 | 0.457644  |
| biological_process | negative regulation of transport                                                               | GO:0051051 | 16276 | 261 | 1.066146802 | 0.0310426 | 0.174774775 | 0.0767207 | 1.047890863 | 0.0883862   | 0.171171171 | 0.247786  |
| biological_process | multicellular organismal homeostasis                                                           | GO:0048871 | 16388 | 149 | 1.087797344 | 0.0311187 | 0.108108108 | 0.0766793 | 1.01810202  | 0.350359    | 0.372972973 | -1        |
| biological_process | cerebral cortex cell migration                                                                 | GO:0021795 | 16508 | 29  | 1.199385961 | 0.0313452 | 0.135135135 | 0.0766618 | 1.155474405 | 0.07333     | 0.203603604 | 0.227606  |
| biological_process | carbohydrate transport                                                                         | GO:0008643 | 16444 | 93  | 1.11108445  | 0.0313933 | 0.055855856 | 0.0766161 | 1.082179922 | 0.08433     | 0.102702703 | 0.244182  |
| biological_process | establishment of planar polarity                                                               | GO:0001736 | 16504 | 33  | 1.186413925 | 0.0316807 | 0.145945946 | 0.0798125 | 1.216453199 | 0.015548    | 0.127927928 | 0.105703  |
| biological_process | prostate gland development                                                                     | GO:0030850 | 16492 | 45  | 1.159574393 | 0.0316833 | 0.140540541 | 0.0797576 | 1.101805561 | 0.118115    | 0.300909091 | 0.2902    |
| biological_process | regulation of response to extracellular stimulus                                               | GO:0032104 | 16501 | 36  | 1.177833412 | 0.0321487 | 0.088288288 | 0.0809977 | 1.07511341  | 0.190990991 | 0.416139    | 0.416139  |
| biological_process | regulation of response to nutrient levels                                                      | GO:0032107 | 16501 | 36  | 1.177833412 | 0.0321487 | 0.088288288 | 0.0809977 | 1.07511341  | 0.190990991 | 0.416139    | 0.416139  |
| biological_process | regulation of collagen metabolic process                                                       | GO:0010712 | 16516 | 21  | 1.23260548  | 0.032343  | 0.091891892 | 0.0816096 | 0.94669445  | 0.664009    | 0.778378378 | -1        |
| biological_process | negative regulation of leukocyte activation                                                    | GO:0002695 | 16    |     |             |           |             |           |             |             |             |           |

|                    |                                                                                                          |            |       |      |             |           |             |           |             |             |             |           |
|--------------------|----------------------------------------------------------------------------------------------------------|------------|-------|------|-------------|-----------|-------------|-----------|-------------|-------------|-------------|-----------|
| biological_process | T cell differentiation                                                                                   | GO:0030217 | 16385 | 152  | 1.085573671 | 0.0331901 | 0.118918919 | 0.0819338 | 1.153742262 | 0.000486615 | 0.034234234 | 0.0219513 |
| biological_process | biomineral tissue development                                                                            | GO:0031214 | 16441 | 96   | 1.107824799 | 0.0332407 | 0.147747748 | 0.0825172 | 1.146119309 | 0.00644188  | 0.118918919 | 0.067778  |
| molecular_function | channel activity                                                                                         | GO:0015267 | 16492 | 369  | 1.054474759 | 0.0334246 | 0.281081081 | 0.0990846 | 1.081986486 | 0.00290563  | 0.223423423 | 0         |
| molecular_function | passive transmembrane transporter activity                                                               | GO:0022803 | 16492 | 369  | 1.054474759 | 0.0334246 | 0.281081081 | 0.0990846 | 1.081986486 | 0.00290563  | 0.223423423 | 0         |
| molecular_function | cadherin binding                                                                                         | GO:0045296 | 16840 | 21   | 1.230725268 | 0.0334391 | 0.156756757 | 0.0960002 | 1.192216565 | 0.0634253   | 0.209009009 | 0.104709  |
| biological_process | response to calcium ion                                                                                  | GO:0051592 | 16449 | 88   | 1.112419719 | 0.0335154 | 0.135135135 | 0.0843954 | 1.165711763 | 0.00347013  | 0.063063063 | 0.056998  |
| biological_process | endocrine process                                                                                        | GO:0050886 | 16483 | 54   | 1.143625884 | 0.033547  | 0.064864865 | 0.0843429 | 0.969474194 | 0.0614448   | 0.67027027  | -1        |
| biological_process | positive regulation of cyclic nucleotide metabolic process                                               | GO:0030801 | 16480 | 57   | 1.139758471 | 0.0335705 | 0.059459459 | 0.0842892 | 1.145109271 | 0.0286626   | 0.095495495 | 0.142998  |
| biological_process | regulation of reproductive process                                                                       | GO:2000241 | 16392 | 145  | 1.087388559 | 0.0335753 | 0.104504505 | 0.0842323 | 1.029965756 | 0.265123    | 0.308108108 | 0.47883   |
| biological_process | protein import                                                                                           | GO:0017038 | 16313 | 224  | 1.070125602 | 0.033611  | 0.048648649 | 0.0841807 | 1.036722981 | 0.168934    | 0.2         | 0.360995  |
| cellular_component | lysosomal membrane                                                                                       | GO:0005765 | 16722 | 101  | 1.10479078  | 0.0336537 | 0.068464868 | 0.0680808 | 1.035321385 | 0.26872     | 0.345945946 | 0.434444  |
| biological_process | positive regulation of cytokine secretion                                                                | GO:0050715 | 16485 | 52   | 1.146233459 | 0.0336753 | 0.151351351 | 0.0841342 | 0.861212933 | 0.958743    | 0.963963964 | -1        |
| biological_process | elevation of cytosolic calcium ion concentration                                                         | GO:0007204 | 16397 | 140  | 1.088881171 | 0.0336795 | 0.16036036  | 0.0840774 | 1.032733238 | 0.250282    | 0.311711712 | 0.459398  |
| biological_process | sensory perception                                                                                       | GO:0007600 | 16186 | 351  | 1.055736663 | 0.0337686 | 0.178378378 | 0.0840351 | 1.018098968 | 0.276404    | 0.34954955  | 0.49419   |
| cellular_component | Golgi stack                                                                                              | GO:0005795 | 16720 | 103  | 1.103589317 | 0.0338824 | 0.111711712 | 0.0604346 | 1.13701477  | 0.00784694  | 0.034234234 | 0         |
| cellular_component | cell envelope                                                                                            | GO:0030313 | 16801 | 22   | 1.224312247 | 0.0341108 | 0.183783784 | 0.0596685 | 1.2392044   | 0.0259111   | 0.178378378 | 0.0152674 |
| cellular_component | external encapsulating structure part                                                                    | GO:0044462 | 16801 | 22   | 1.224312247 | 0.0341108 | 0.183783784 | 0.0596685 | 1.2392044   | 0.0259111   | 0.178378378 | 0.0152674 |
| biological_process | positive regulation of protein secretion                                                                 | GO:0050714 | 16463 | 74   | 1.122104171 | 0.0341227 | 0.099099099 | 0.0871566 | 0.949716011 | 0.773667    | 0.825225225 | -1        |
| biological_process | acylglycerol metabolic process                                                                           | GO:0006639 | 16470 | 67   | 1.128290831 | 0.034188  | 0.057657658 | 0.0871088 | 1.030738601 | 0.331189    | 0.340540541 | -1        |
| biological_process | endosome organization                                                                                    | GO:0007032 | 16515 | 22   | 1.224132509 | 0.0342219 | 0.025225225 | 0.0870555 | 1.161670094 | 0.0943769   | 0.057657658 | 0.256224  |
| biological_process | extrinsic apoptotic signaling pathway                                                                    | GO:0097191 | 16500 | 37   | 1.172690539 | 0.0342697 | 0.05045045  | 0.0870047 | 1.044020023 | 0.321231    | 0.243243243 | -1        |
| biological_process | response to monosaccharide stimulus                                                                      | GO:0034284 | 16402 | 135  | 1.090909191 | 0.0343522 | 0.084684685 | 0.08758   | 1.109977116 | 0.0131296   | 0.01981982  | 0.0987403 |
| biological_process | regulation of cardiac muscle cell action potential                                                       | GO:0086001 | 16513 | 24   | 1.214363881 | 0.0343598 | 0.127207021 | 0.0881406 | 1.376450724 | 0.000695174 | 0.021621622 | 0.0313195 |
| biological_process | negative regulation of response to cytokine stimulus                                                     | GO:0060761 | 16513 | 24   | 1.214293336 | 0.0344054 | 0.036036036 | 0.0887064 | 1.279154276 | 0.00888352  | 0.037837838 | 0.0772285 |
| biological_process | positive regulation of cell cycle phase transition                                                       | GO:1901989 | 16515 | 22   | 1.223786198 | 0.034436  | 0.052252252 | 0.089823  | 1.110295128 | 0.184963    | 0.18018018  | 0.378999  |
| biological_process | positive regulation of mitotic cell cycle phase transition                                               | GO:1901992 | 16515 | 22   | 1.223786198 | 0.034436  | 0.052252252 | 0.089823  | 1.110295128 | 0.184963    | 0.18018018  | 0.378999  |
| biological_process | positive regulation of BMP signaling pathway                                                             | GO:0030513 | 16512 | 25   | 1.209809305 | 0.0345033 | 0.036036031 | 0.0897744 | 1.219227645 | 0.0287162   | 0.048648649 | 0.142896  |
| biological_process | positive regulation of lymphocyte mediated immunity                                                      | GO:0002708 | 16490 | 47   | 1.152879337 | 0.0345381 | 0.064864865 | 0.0897201 | 0.993856263 | 0.529142    | 0.565765766 | -1        |
| biological_process | neutral lipid metabolic process                                                                          | GO:0006638 | 16468 | 69   | 1.12586582  | 0.0347872 | 0.081081081 | 0.0897044 | 1.03197546  | 0.322413    | 0.317117117 | -1        |
| biological_process | lymphocyte proliferation                                                                                 | GO:0046651 | 16372 | 165  | 1.081120715 | 0.0348483 | 0.045045045 | 0.0896549 | 1.05916936  | 0.0929195   | 0.046846847 | 0.253642  |
| biological_process | cytoplasmic transport                                                                                    | GO:0016482 | 16025 | 512  | 1.045502844 | 0.0350282 | 0.21981982  | 0.0914636 | 1.034170004 | 0.0868643   | 0.261261261 | 0.245994  |
| biological_process | dorsal/ventral pattern formation                                                                         | GO:0009953 | 16459 | 78   | 1.118095372 | 0.035088  | 0.046846847 | 0.091413  | 1.122182321 | 0.0305037   | 0.084684685 | 0.146621  |
| biological_process | negative regulation of ERK1 and ERK2 cascade                                                             | GO:0070373 | 16517 | 20   | 1.233605489 | 0.0351018 | 0.028828829 | 0.0913541 | 0.889977552 | 0.80312     | 0.801801802 | -1        |
| biological_process | regulation of peptidase activity                                                                         | GO:0052547 | 16330 | 207  | 1.072176378 | 0.035153  | 0.181981982 | 0.0913021 | 0.976206187 | 0.724686    | 0.722522523 | -1        |
| cellular_component | integral to Golgi membrane                                                                               | GO:0030173 | 16787 | 36   | 1.173948562 | 0.0351716 | 0.03963964  | 0.0590459 | 1.056233066 | 0.27927     | 0.243243243 | 0.446504  |
| cellular_component | intrinsic to Golgi membrane                                                                              | GO:0031228 | 16787 | 36   | 1.173948562 | 0.0351716 | 0.03963964  | 0.0590459 | 1.056233066 | 0.27927     | 0.243243243 | 0.446504  |
| biological_process | endothelial cell proliferation                                                                           | GO:0001935 | 16461 | 76   | 1.119552945 | 0.0351976 | 0.115315315 | 0.091249  | 1.189642159 | 0.00205137  | 0.028828829 | 0.0505983 |
| biological_process | histone modification                                                                                     | GO:0016570 | 16258 | 279  | 1.061965304 | 0.035304  | 0.317117117 | 0.0912071 | 1.165985889 | 6.39E-07    | 0.014414414 | 0         |
| biological_process | striated muscle contraction                                                                              | GO:0006941 | 16453 | 84   | 1.113593459 | 0.0353171 | 0.036036036 | 0.0911484 | 1.152188684 | 0.00771596  | 0.014414414 | 0.0772934 |
| biological_process | regulation of adenylate cyclase activity                                                                 | GO:0045761 | 16508 | 29   | 1.19363534  | 0.0353271 | 0.108108108 | 0.0910891 | 1.171325101 | 0.0548648   | 0.230630631 | 0.192983  |
| biological_process | cellular response to fibroblast growth factor stimulus                                                   | GO:0044344 | 16474 | 63   | 1.131070823 | 0.0355094 | 0.066666667 | 0.0910002 | 1.11945348  | 0.0499502   | 0.151351351 | 0.183374  |
| biological_process | response to fibroblast growth factor stimulus                                                            | GO:0071774 | 16474 | 63   | 1.131070823 | 0.0355094 | 0.066666667 | 0.0910002 | 1.11945348  | 0.0499502   | 0.151351351 | 0.183374  |
| biological_process | bone morphogenesis                                                                                       | GO:0060349 | 16470 | 67   | 1.127029146 | 0.0355699 | 0.126126126 | 0.0915578 | 1.093577355 | 0.0918647   | 0.192792793 | 0.252116  |
| molecular_function | ption regulatory region sequence-specific DNA binding transcription factor activity involved in negative | GO:0001227 | 16831 | 30   | 1.189966365 | 0.0356304 | 0.001801802 | 0.0987246 | 1.201969694 | 0.0275688   | 0.142342342 | 0.0545842 |
| biological_process | neuron maturation                                                                                        | GO:0042551 | 16512 | 25   | 1.207913059 | 0.0357773 | 0.124324324 | 0.0915344 | 1.132687269 | 0.125081    | 0.203603604 | 0.300709  |
| biological_process | purine nucleoside triphosphate metabolic process                                                         | GO:0009144 | 15967 | 570  | 1.042807587 | 0.0358178 | 0.187387387 | 0.0914806 | 1.043851438 | 0.0324963   | 0.140540541 | 0.149332  |
| biological_process | catabolic process                                                                                        | GO:0009056 | 14879 | 1658 | 1.024233732 | 0.0358225 | 0.248648649 | 0.0914204 | 1.031729706 | 0.0100269   | 0.158558559 | 0.0807543 |
| biological_process | ethanolamine-containing compound metabolic process                                                       | GO:0042439 | 16491 | 46   | 1.153100509 | 0.0358495 | 0.120720721 | 0.0913643 | 1.027991649 | 0.370987    | 0.367567568 | -1        |
| biological_process | cGMP metabolic process                                                                                   | GO:0046068 | 16501 | 36   | 1.173080034 | 0.0358784 | 0.057657658 | 0.0913087 | 1.030115881 | 0.377037    | 0.394594595 | -1        |
| biological_process | negative regulation of homeostatic process                                                               | GO:0032845 | 16517 | 20   | 1.232251029 | 0.0359227 | 0.005405405 | 0.0912558 | 1.060814979 | 0.318706    | 0.335135135 | -1        |
| biological_process | regulation of cell junction assembly                                                                     | GO:1901888 | 16511 | 26   | 1.203456176 | 0.0360556 | 0.181981982 | 0.0912209 | 1.241573645 | 0.016372    | 0.194594595 | 0.111398  |
| biological_process | central nervous system projection neuron axonogenesis                                                    | GO:0021952 | 16515 | 22   | 1.220735362 | 0.0363702 | 0.084684685 | 0.0912151 | 1.024041695 | 0.422539    | 0.445045045 | -1        |
| molecular_function | sugar transmembrane transporter activity                                                                 | GO:0051119 | 16836 | 75   | 1.206870658 | 0.0364938 | 0.034234234 | 0.098479  | 1.221084876 | 0.0276761   | 0.009009009 | 0.0540127 |
| biological_process | positive regulation of binding                                                                           | GO:0051099 | 16463 | 24   | 1.120049927 | 0.03651   | 0.036036036 | 0.0911796 | 1.062305572 | 0.176087    | 0.189189189 | 0.370139  |
| biological_process | iptive immune response based on somatic recombination of immune receptors built from immunoglobli        | GO:0002824 | 16489 | 48   | 1.149079672 | 0.0366024 | 0.052252252 | 0.0929458 | 0.962395356 | 0.674358    | 0.708108108 | -1        |
| biological_process | regulation of protein secretion                                                                          | GO:0050708 | 16424 | 113  | 1.09695707  | 0.0366197 | 0.095495495 | 0.0928873 | 0.978059676 | 0.657421    | 0.72972973  | -1        |
| biological_process | renal tubule development                                                                                 | GO:0061326 | 16504 | 33   | 1.179216519 | 0.0371339 | 0.093693694 | 0.0941223 | 1.052983402 | 0.298865    | 0.34954955  | -1        |
| biological_process | epithelial cell morphogenesis                                                                            | GO:0003362 | 16506 | 31   | 1.184868499 | 0.037173  | 0.081081081 | 0.0940672 | 1.134583358 | 0.0969587   | 0.106306306 | 0.258055  |
| biological_process | aromatic compound catabolic process                                                                      | GO:0019439 | 15818 | 719  | 1.037551556 | 0.0372849 | 0.14954955  | 0.0940256 | 1.049232873 | 0.0096975   | 0.061261261 | 0.0792021 |
| biological_process | receptor clustering                                                                                      | GO:0043113 | 16509 | 28   | 1.194063524 | 0.0375272 | 0.127927928 | 0.0940083 | 1.177849729 | 0.0514035   | 0.153153153 | 0.185677  |
| biological_process | demethylation                                                                                            | GO:0070988 | 16502 | 35   | 1.173339754 | 0.0376951 | 0.081081081 | 0.093977  | 1.276005816 | 0.00231839  | 0.018018018 | 0.0580103 |
| biological_process | embryonic hemopoiesis                                                                                    | GO:0035162 | 16513 | 24   | 1.209350159 | 0.0377279 | 0.064864865 | 0.0945198 | 1.272119948 | 0.1004246   | 0.048648649 | 0.0805085 |
| biological_process | lipid modification                                                                                       | GO:0030258 | 16403 | 134  | 1.0881624   | 0.0379676 | 0.117117117 | 0.0945018 | 0.998120713 | 0.51512     | 0.535135135 | -1        |
| biological_process | protein complex disassembly                                                                              | GO:0043241 | 16465 | 72   | 1.120480459 | 0.0379863 | 0.059459459 | 0.0944429 | 1.11503003  | 0.05451074  | 0.059459459 | 0.17773   |
| biological_process | regulation of steroid metabolic process                                                                  | GO:0019218 | 16480 | 57   | 1.135468497 | 0.0379876 | 0.05045045  | 0.0943808 | 0.956327041 | 0.716392    | 0.637837838 | -1        |
| molecular_function | Wnt-protein binding                                                                                      | GO:0017147 | 16834 | 27   | 1.196844864 | 0.0381102 | 0.118918919 | 0.0984432 | 1.059481343 | 0.296065    | 0.326126126 | -1        |
| biological_process | negative regulation of DNA metabolic process                                                             | GO:0051053 | 16480 | 57   | 1.135315738 | 0.0381532 | 0.113513514 | 0.0949463 | 1.146276178 | 0.0276756   | 0.059459459 | 0.140679  |
| biological_process | positive regulation of T cell activation                                                                 | GO:0050870 | 16427 | 110  | 1.097018773 | 0.0385052 | 0.082882883 | 0.0955455 | 1.14311222  | 0.00454763  | 0.046846847 | 0.0582937 |
| biological_process | negative regulation of sequence-specific DNA binding transcription factor activity                       | GO:0043433 | 16438 | 99   | 1.1022011   | 0.0386495 | 0.075675676 | 0.0955096 | 1.080856859 | 0.0811134   | 0.113513514 | 0.239417  |
| biological_process | negative regulation of neuron apoptotic process                                                          | GO:0043524 | 16442 | 95   | 1.104310804 | 0.0386954 | 0.121621623 | 0.0954553 | 1.118759236 | 0.0221808   | 0.151351351 | 0.12817   |
| biological_process | regulation of glial cell differentiation                                                                 | GO:0045685 | 16489 | 48   | 1.146776887 | 0.0388763 | 0.045045045 | 0.0954262 | 1.07069176  | 0.197801    | 0.12972973  | 0.393817  |
| biological_process | organic cyclic compound catabolic process                                                                | GO:1901361 | 15797 | 740  | 1.036571142 | 0.0389561 | 0.147747748 | 0.0953783 | 1.044936834 | 0.0514488   | 0.086486486 | 0.105528  |
| biological_process | positive regulation of lymphocyte activation                                                             | GO:0051251 | 16387 | 150  |             |           |             |           |             |             |             |           |

|                    |                                                                                         |            |       |      |             |           |             |           |             |             |             |            |
|--------------------|-----------------------------------------------------------------------------------------|------------|-------|------|-------------|-----------|-------------|-----------|-------------|-------------|-------------|------------|
| biological_process | T cell differentiation in thymus                                                        | GO:0033077 | 16471 | 66   | 1.124171389 | 0.0399961 | 0.079279279 | 0.095539  | 1.218994646 | 0.0010085   | 0.043243243 | 0.0390622  |
| biological_process | positive regulation of carbohydrate metabolic process                                   | GO:0045913 | 16497 | 40   | 1.159445732 | 0.040167  | 0.100900901 | 0.0960996 | 1.136540831 | 0.0671278   | 0.21981982  | 0.218876   |
| biological_process | regulation of microtubule cytoskeleton organization                                     | GO:0070507 | 16459 | 78   | 1.114047183 | 0.0401715 | 0.126126126 | 0.0960376 | 1.146493959 | 0.012342    | 0.075675676 | 0.0950518  |
| biological_process | calcium-mediated signaling                                                              | GO:0019722 | 16465 | 72   | 1.118627817 | 0.0402962 | 0.16036036  | 0.0959981 | 1.0647366   | 0.170175    | 0.356756757 | 0.362229   |
| biological_process | organelle transport along microtubule                                                   | GO:0072384 | 16514 | 23   | 1.210165587 | 0.0403205 | 0.131531532 | 0.09594   | 1.154993389 | 0.0988115   | 0.196396396 | 0.262092   |
| biological_process | membrane lipid biosynthetic process                                                     | GO:0046467 | 16465 | 72   | 1.118552233 | 0.0403928 | 0.052252252 | 0.0958908 | 0.964682184 | 0.698563    | 0.668468468 | -1         |
| biological_process | response to dsRNA                                                                       | GO:0043331 | 16496 | 41   | 1.156739686 | 0.0408874 | 0.117117117 | 0.0959202 | 1.047763397 | 0.297938    | 0.344141414 | -1         |
| biological_process | organ formation                                                                         | GO:0048645 | 16490 | 47   | 1.146294867 | 0.0409628 | 0.077477477 | 0.0958717 | 1.193222408 | 0.0107905   | 0.106306306 | 0.0857517  |
| molecular_function | serine-type endopeptidase inhibitor activity                                            | GO:0004867 | 16791 | 70   | 1.119764514 | 0.0410002 | 0.171171717 | 0.103191  | 0.953414034 | 0.750652    | 0.74954955  | -1         |
| cellular_component | clathrin coat                                                                           | GO:0030118 | 16780 | 43   | 1.152623118 | 0.0413072 | 0.18018018  | 0.083841  | 1.186754887 | 0.0168399   | 0.091891892 | 0.00809718 |
| molecular_function | protein tyrosine phosphatase activity                                                   | GO:0004725 | 16765 | 96   | 1.101886603 | 0.041455  | 0.176576577 | 0.102817  | 1.159196221 | 0.00336994  | 0.068468468 | 0          |
| molecular_function | double-stranded DNA binding                                                             | GO:0003690 | 16740 | 121  | 1.090633359 | 0.0415479 | 0.059459459 | 0.102343  | 1.148869873 | 0.00220848  | 0.084684685 | 0          |
| biological_process | regulation of histone modification                                                      | GO:0031056 | 16471 | 66   | 1.1228686   | 0.0416046 | 0.145945946 | 0.0976949 | 1.250071021 | 0.000211032 | 0.010810811 | 0.0127106  |
| biological_process | protein polymerization                                                                  | GO:0051258 | 16396 | 141  | 1.083663058 | 0.0419835 | 0.028828829 | 0.0977029 | 1.050290418 | 0.14947     | 0.158558559 | 0.340673   |
| biological_process | pallium development                                                                     | GO:0021543 | 16433 | 104  | 1.097181928 | 0.042537  | 0.190990991 | 0.0989182 | 1.055428299 | 0.163023    | 0.304504505 | 0.354505   |
| biological_process | response to estradiol stimulus                                                          | GO:0032355 | 16435 | 102  | 1.098124662 | 0.042555  | 0.144144144 | 0.0988573 | 0.9999796   | 0.50017     | 0.466666667 | -1         |
| molecular_function | cargo receptor activity                                                                 | GO:0038024 | 16807 | 54   | 1.134882139 | 0.0427569 | 0.108108108 | 0.106537  | 0.954291873 | 0.719962    | 0.715315315 | -1         |
| biological_process | antigen processing and presentation of peptide antigen                                  | GO:0048002 | 16501 | 36   | 1.165249557 | 0.0427899 | 0.106306306 | 0.0994235 | 1.002505975 | 0.489621    | 0.502702703 | -1         |
| biological_process | nucleoside triphosphate metabolic process                                               | GO:0009141 | 15951 | 586  | 1.040242969 | 0.0429043 | 0.192792793 | 0.099655  | 1.044389893 | 0.0290482   | 0.118918919 | 0.142651   |
| biological_process | mechanoreceptor differentiation                                                         | GO:0042490 | 16486 | 51   | 1.13861977  | 0.0429647 | 0.075675676 | 0.0999123 | 1.05382606  | 0.252455    | 0.369369369 | 0.462244   |
| biological_process | metanephric nephron development                                                         | GO:0072210 | 16502 | 35   | 1.167372525 | 0.0430014 | 0.127927928 | 0.100438  | 1.184107971 | 0.0294752   | 0.108108108 | 0.143047   |
| molecular_function | cytokine receptor binding                                                               | GO:0005126 | 16701 | 160  | 1.077971868 | 0.0430396 | 0.113513514 | 0.110397  | 1.099936951 | 0.0139021   | 0.041441441 | 0.0242374  |
| biological_process | negative regulation of leukocyte differentiation                                        | GO:1902106 | 16482 | 55   | 1.133294578 | 0.0431686 | 0.145945946 | 0.101569  | 0.973980513 | 0.631131    | 0.697297297 | -1         |
| biological_process | regulation of generation of precursor metabolites and energy                            | GO:0043467 | 16492 | 45   | 1.147362745 | 0.043216  | 0.142342342 | 0.101513  | 1.134651237 | 0.058601    | 0.142342342 | 0.202083   |
| biological_process | organonitrogen compound catabolic process                                               | GO:1901565 | 15836 | 701  | 1.036582141 | 0.0432482 | 0.133333333 | 0.101453  | 1.04261159  | 0.0229233   | 0.127927928 | 0.128725   |
| biological_process | negative regulation of reproductive process                                             | GO:2000242 | 16474 | 63   | 1.124306197 | 0.0434318 | 0.034234234 | 0.101424  | 1.010925765 | 0.44021     | 0.421621622 | -1         |
| biological_process | negative regulation of immune system process                                            | GO:0002683 | 16377 | 160  | 1.077680738 | 0.0436214 | 0.095495495 | 0.101395  | 0.98247541  | 0.64799     | 0.621621622 | -1         |
| cellular_component | cleavage furrow                                                                         | GO:0032154 | 16788 | 35   | 1.166711448 | 0.0436245 | 0.014414414 | 0.083784  | 1.212771523 | 0.0145337   | 0.007207207 | 0.00823791 |
| biological_process | immune response-activating cell surface receptor signaling pathway                      | GO:0002429 | 16457 | 80   | 1.109879417 | 0.0439706 | 0.014414414 | 0.102557  | 1.046686863 | 0.234232    | 0.223423423 | 0.433051   |
| biological_process | negative regulation of lymphocyte activation                                            | GO:0051250 | 16457 | 80   | 1.109865812 | 0.0439902 | 0.140540541 | 0.102494  | 1.010155723 | 0.437364    | 0.434234234 | -1         |
| biological_process | multicellular organismal response to stress                                             | GO:0033555 | 16480 | 57   | 1.130064656 | 0.0442145 | 0.145945946 | 0.10305   | 1.1243065   | 0.0517292   | 0.156756757 | 0.18728    |
| biological_process | negative regulation of neuron death                                                     | GO:1901215 | 16439 | 98   | 1.099047031 | 0.0442526 | 0.221621622 | 0.102992  | 1.121345782 | 0.0184518   | 0.135135135 | 0.115548   |
| biological_process | positive regulation of T cell proliferation                                             | GO:0042102 | 16476 | 61   | 1.125275085 | 0.0447717 | 0.108108108 | 0.104181  | 1.07494473  | 0.154891    | 0.214414414 | 0.344771   |
| biological_process | response to ammonium ion                                                                | GO:0060359 | 16477 | 60   | 1.126288651 | 0.0448096 | 0.275675676 | 0.104122  | 1.120552348 | 0.0525832   | 0.207207207 | 0.189258   |
| biological_process | chromosome organization                                                                 | GO:0051276 | 15900 | 637  | 1.038048544 | 0.0449295 | 0.299099099 | 0.104079  | 1.084140159 | 8.80E-05    | 0.045045045 | 0.00586961 |
| biological_process | lamellipodium assembly                                                                  | GO:0030032 | 16499 | 38   | 1.158620994 | 0.0449855 | 0.154954955 | 0.104023  | 1.180837845 | 0.0266155   | 0.214414414 | 0.138298   |
| biological_process | inner ear receptor cell differentiation                                                 | GO:0060113 | 16492 | 45   | 1.145570235 | 0.0451639 | 0.032432432 | 0.103992  | 1.084264755 | 0.163451    | 0.315315315 | 0.354851   |
| biological_process | regulation of sterol transport                                                          | GO:0032371 | 16512 | 25   | 1.195108567 | 0.0454218 | 0.109909991 | 0.105057  | 1.202224324 | 0.0398322   | 0.043243243 | 0.165819   |
| biological_process | regulation of cholesterol transport                                                     | GO:0032374 | 16512 | 25   | 1.195108567 | 0.0454218 | 0.109909991 | 0.105057  | 1.202224324 | 0.0398322   | 0.043243243 | 0.165819   |
| molecular_function | oxidoreductase activity, acting on single donors with incorporation of molecular oxygen | GO:0016701 | 16784 | 77   | 1.110948712 | 0.0454981 | 0.068468468 | 0.119088  | 1.200702569 | 0.00111606  | 0.003603604 | 0          |
| biological_process | lymphocyte activation                                                                   | GO:0046649 | 16153 | 384  | 1.049187552 | 0.0455968 | 0.156756757 | 0.105025  | 1.109733289 | 8.21E-05    | 0.001801802 | 0.00593902 |
| biological_process | T cell mediated immunity                                                                | GO:0002456 | 16491 | 46   | 1.143567754 | 0.0456211 | 0.01981982  | 0.104963  | 0.998336527 | 0.507828    | 0.52972973  | -1         |
| molecular_function | cholesterol binding                                                                     | GO:0015485 | 16833 | 28   | 1.183748661 | 0.0459453 | 0.126126126 | 0.118667  | 1.133949419 | 0.109593    | 0.108108108 | 0.196485   |
| biological_process | single-organism metabolic process                                                       | GO:0044710 | 13841 | 2696 | 1.017092688 | 0.046463  | 0.277477477 | 0.106209  | 0.983844807 | 0.943919    | 0.758558559 | -1         |
| biological_process | cellular protein complex disassembly                                                    | GO:0043624 | 16470 | 67   | 1.118253308 | 0.0464863 | 0.091891892 | 0.106146  | 1.128794421 | 0.0336492   | 0.032424242 | 0.153594   |
| biological_process | response to hexose stimulus                                                             | GO:0009746 | 16412 | 125  | 1.086113164 | 0.0470786 | 0.102702703 | 0.107909  | 1.115253422 | 0.0125319   | 0.007207207 | 0.095565   |
| biological_process | drug transport                                                                          | GO:0015893 | 16508 | 29   | 1.179010666 | 0.047345  | 0.100900901 | 0.109033  | 0.953310275 | 0.668559    | 0.627027027 | -1         |
| cellular_component | microvillus                                                                             | GO:0005902 | 16761 | 62   | 1.122279835 | 0.0473821 | 0.153153153 | 0.0957179 | 1.009936425 | 0.44601     | 0.434234234 | -1         |
| biological_process | regulation of chromosome organization                                                   | GO:0033044 | 16435 | 102  | 1.095170078 | 0.0474665 | 0.169369369 | 0.108988  | 1.174220608 | 0.00111755  | 0.054054054 | 0.0421715  |
| biological_process | autophagy                                                                               | GO:0006914 | 16433 | 104  | 1.094201602 | 0.0475423 | 0.165765766 | 0.108934  | 1.029164688 | 0.302675    | 0.273873874 | -1         |
| biological_process | regulation of biosynthetic process                                                      | GO:0009889 | 13546 | 2991 | 1.015950793 | 0.0475627 | 0.376576577 | 0.108869  | 1.052602975 | 1.84E-08    | 0.165765766 | 0          |
| biological_process | embryonic camera-type eye development                                                   | GO:0031076 | 16503 | 34   | 1.165074677 | 0.0475703 | 0.185585586 | 0.108802  | 1.132041908 | 0.090952    | 0.221621622 | 0.2511     |
| molecular_function | cyclic-nucleotide phosphodiesterase activity                                            | GO:0004112 | 16837 | 24   | 1.196502763 | 0.0475992 | 0.090909099 | 0.118638  | 0.999877088 | 0.500427    | 0.473873874 | -1         |
| biological_process | establishment of tissue polarity                                                        | GO:0007164 | 16503 | 34   | 1.164982198 | 0.0476631 | 0.163963964 | 0.108751  | 1.231385639 | 0.00966001  | 0.095495495 | 0.0783139  |
| biological_process | negative regulation of cytokine production                                              | GO:0001818 | 16445 | 92   | 1.100118268 | 0.0476664 | 0.135135135 | 0.108683  | 0.986640105 | 0.588093    | 0.6         | -1         |
| biological_process | response to ketone                                                                      | GO:1901654 | 16439 | 98   | 1.096957835 | 0.0477179 | 0.075675676 | 0.108625  | 0.992290685 | 0.552766    | 0.569369369 | -1         |
| biological_process | heterocycle catabolic process                                                           | GO:0046700 | 15820 | 717  | 1.035156316 | 0.0477654 | 0.185585586 | 0.108565  | 1.050510043 | 0.00830954  | 0.073873874 | 0.0772602  |
| biological_process | skeletal muscle cell differentiation                                                    | GO:0035914 | 16486 | 51   | 1.134263774 | 0.0481255 | 0.07027027  | 0.10857   | 1.244695494 | 0.00121703  | 0.009009009 | 0.0411689  |
| biological_process | positive regulation of cellular carbohydrate metabolic process                          | GO:0010676 | 16504 | 33   | 1.166870256 | 0.0482573 | 0.104504505 | 0.108528  | 1.115597901 | 0.124802    | 0.263063063 | 0.300517   |
| biological_process | positive regulation of Rac GTPase activity                                              | GO:0032855 | 16509 | 28   | 1.180778059 | 0.0486328 | 0.122522523 | 0.109666  | 1.27467036  | 0.0058753   | 0.005405405 | 0.0645124  |
| biological_process | CD4-positive, alpha-beta T cell differentiation                                         | GO:0043367 | 16499 | 38   | 1.155027981 | 0.0487453 | 0.05045045  | 0.10962   | 1.056275816 | 0.273748    | 0.369369369 | 0.489594   |
| molecular_function | Rho GTPase binding                                                                      | GO:0017048 | 16815 | 46   | 1.140837085 | 0.0487852 | 0.237837838 | 0.122615  | 1.278597406 | 0.000523979 | 0.023423423 | 0          |
| biological_process | regulation of cyclase activity                                                          | GO:0031279 | 16504 | 33   | 1.16611167  | 0.0490196 | 0.086486486 | 0.109607  | 1.076272361 | 0.223739    | 0.333333333 | 0.422951   |
| biological_process | regulation of cellular biosynthetic process                                             | GO:0031326 | 13572 | 2965 | 1.015890534 | 0.0490684 | 0.376576577 | 0.109548  | 1.05349632  | 1.28E-08    | 0.158558559 | 0          |
| biological_process | embryonic camera-type eye morphogenesis                                                 | GO:0048596 | 16512 | 25   | 1.190803316 | 0.0490993 | 0.205405405 | 0.109485  | 1.14115265  | 0.110603    | 0.252252252 | 0.276472   |
| biological_process | leukocyte mediated immunity                                                             | GO:0002443 | 16369 | 168  | 1.07320294  | 0.0492918 | 0.131531532 | 0.109455  | 0.943537209 | 0.898702    | 0.866666667 | -1         |
| biological_process | nephron tubule development                                                              | GO:0072080 | 16505 | 32   | 1.168362348 | 0.049349  | 0.126126126 | 0.109398  | 1.06961973  | 0.247379    | 0.322522523 | 0.455902   |
| molecular_function | deacetylase activity                                                                    | GO:0019213 | 16831 | 30   | 1.173756336 | 0.0494828 | 0.090630631 | 0.126377  | 0.977263109 | 0.585477    | 0.601801802 | -1         |
| biological_process | regulation of endopeptidase activity                                                    | GO:0052548 | 16346 | 191  | 1.068493117 | 0.0495633 | 0.196396396 | 0.109373  | 0.952238179 | 0.87494     | 0.855858586 | -1         |
| molecular_function | lipase activity                                                                         | GO:0016298 | 16781 | 80   | 1.106184731 | 0.049579  | 0.133333333 | 0.125821  | 0.985247043 | 0.590614    | 0.551351351 | -1         |
| molecular_function | phosphatase inhibitor activity                                                          | GO:0019212 | 16831 | 30   | 1.173633772 | 0.049602  | 0.059459459 | 0.129284  | 1.212098985 | 0.0220061   | 0.016216216 | 0.0504511  |
| cellular_component | anchored to membrane                                                                    | GO:0031225 | 16723 | 100  | 1.094859123 | 0.0496823 | 0.102702703 | 0.0956495 | 0.950503364 | 0.805081    | 0.740540541 | -1         |
| biological_process | response to corticosteroid stimulus                                                     | GO:0031960 | 16383 | 154  | 1.076257702 | 0.049798  | 0.232432432 | 0.109914  | 0.98229826  | 0.648928    | 0.663063063 |            |

|                    |                                                                                                          |            |       |      |             |           |             |          |             |             |             |           |
|--------------------|----------------------------------------------------------------------------------------------------------|------------|-------|------|-------------|-----------|-------------|----------|-------------|-------------|-------------|-----------|
| biological_process | endochondral bone morphogenesis                                                                          | GO:0060350 | 16494 | 43   | 1.143771349 | 0.051018  | 0.178378378 | 0.112407 | 1.063763659 | 0.234188    | 0.248648649 | 0.433226  |
| biological_process | positive regulation of nucleotide biosynthetic process                                                   | GO:0030810 | 16481 | 56   | 1.125880498 | 0.0510922 | 0.077477477 | 0.112838 | 1.144044355 | 0.0307287   | 0.081081081 | 0.147046  |
| biological_process | positive regulation of purine nucleotide biosynthetic process                                            | GO:1900373 | 16481 | 56   | 1.125880498 | 0.0510922 | 0.077477477 | 0.112838 | 1.144044355 | 0.0307287   | 0.081081081 | 0.147046  |
| biological_process | epithelial cell development                                                                              | GO:0002064 | 16355 | 182  | 1.069488539 | 0.051268  | 0.061261261 | 0.11336  | 1.065348874 | 0.062349    | 0.088282888 | 0.212024  |
| biological_process | organic substance catabolic process                                                                      | GO:1901575 | 14995 | 1542 | 1.022825646 | 0.0515273 | 0.257657658 | 0.113899 | 1.035797426 | 0.00528457  | 0.145945946 | 0.0628931 |
| biological_process | trabecula formation                                                                                      | GO:0060343 | 16516 | 21   | 1.205245601 | 0.0515384 | 0.054054054 | 0.11383  | 0.896965738 | 0.793432    | 0.789189189 | -1        |
| biological_process | negative regulation of carbohydrate metabolic process                                                    | GO:0045912 | 16516 | 21   | 1.205228324 | 0.0515299 | 0.102702703 | 0.113762 | 1.123045028 | 0.164226    | 0.081081081 | 0.354003  |
| biological_process | regulation of TOR signaling cascade                                                                      | GO:0032006 | 16503 | 34   | 1.160891783 | 0.0519118 | 0.054054054 | 0.113766 | 1.073630782 | 0.228327    | 0.257657658 | 0.42657   |
| biological_process | skin development                                                                                         | GO:0043588 | 16486 | 51   | 1.131285478 | 0.0519313 | 0.133333333 | 0.113699 | 1.23981308  | 0.00148448  | 0.025252525 | 0.0430424 |
| molecular_function | ase activity, acting on single donors with incorporation of molecular oxygen, incorporation of two atoms | GO:0016702 | 16786 | 75   | 1.108060647 | 0.052129  | 0.082882883 | 0.132948 | 1.188543045 | 0.00229475  | 0.003603604 | 0         |
| molecular_function | core promoter proximal region sequence-specific DNA binding                                              | GO:0000987 | 16822 | 39   | 1.149899309 | 0.0522615 | 0.048648649 | 0.132387 | 1.253594834 | 0.00301375  | 0.041441441 | 0         |
| biological_process | antigen receptor-mediated signaling pathway                                                              | GO:0050851 | 16470 | 67   | 1.114123502 | 0.0524819 | 0.048648649 | 0.114298 | 1.06497195  | 0.178011    | 0.176576577 | 0.372476  |
| biological_process | response to radiation                                                                                    | GO:0009314 | 16239 | 298  | 1.053720738 | 0.052521  | 0.181981982 | 0.114235 | 1.037134923 | 0.13127     | 0.304504505 | 0.311209  |
| molecular_function | activating transcription factor binding                                                                  | GO:0033613 | 16819 | 47   | 1.144156936 | 0.0525946 | 0.154954955 | 0.1319   | 1.272072138 | 0.00111455  | 0.018018018 | 0         |
| biological_process | dopamine receptor signaling pathway                                                                      | GO:0007212 | 16510 | 22   | 1.17984562  | 0.052624  | 0.140540541 | 0.114186 | 1.085037837 | 0.221857    | 0.135135135 | 0.420037  |
| biological_process | positive regulation of leukocyte mediated immunity                                                       | GO:0002705 | 16489 | 48   | 1.134776706 | 0.0526525 | 0.084684685 | 0.11412  | 0.975297503 | 0.616738    | 0.652522522 | -1        |
| biological_process | regulation of leukocyte migration                                                                        | GO:0002685 | 16464 | 73   | 1.109047686 | 0.0529066 | 0.093693694 | 0.114655 | 1.137472147 | 0.0207306   | 0.023423423 | 0.126229  |
| molecular_function | inorganic cation transmembrane transporter activity                                                      | GO:0022890 | 16423 | 438  | 1.044019561 | 0.0529534 | 0.237837838 | 0.131425 | 1.016977572 | 0.26645     | 0.385585586 | 0.459969  |
| biological_process | regulation of transmembrane transporter activity                                                         | GO:0022898 | 16462 | 75   | 1.107318539 | 0.0533264 | 0.300900901 | 0.115775 | 1.20314826  | 0.00112839  | 0.041441441 | 0.0419329 |
| biological_process | circadian rhythm                                                                                         | GO:0007623 | 16449 | 88   | 1.098781661 | 0.053779  | 0.118918919 | 0.117448 | 1.060970544 | 0.160291    | 0.252252252 | 0.350837  |
| biological_process | pituitary gland development                                                                              | GO:0021983 | 16498 | 39   | 1.148538183 | 0.0538547 | 0.063063063 | 0.117391 | 1.160578869 | 0.0401098   | 0.095495495 | 0.167284  |
| cellular_component | MHC class I protein complex                                                                              | GO:0042612 | 16797 | 26   | 1.18170077  | 0.0541368 | 0.163963964 | 0.107525 | 0.841636942 | 0.919209    | 0.753153153 | -1        |
| biological_process | sterol metabolic process                                                                                 | GO:0016125 | 16437 | 100  | 1.092326753 | 0.0543594 | 0.144144144 | 0.118523 | 1.035846943 | 0.266734    | 0.322522523 | 0.480894  |
| biological_process | regulation of carbohydrate metabolic process                                                             | GO:0006109 | 16442 | 95   | 1.094628446 | 0.0545671 | 0.18018018  | 0.119042 | 1.153597141 | 0.00465438  | 0.064864865 | 0.0591332 |
| biological_process | gastrulation with mouth forming second                                                                   | GO:0001702 | 16505 | 32   | 1.163237769 | 0.0546952 | 0.10990991  | 0.119542 | 1.16188482  | 0.0561806   | 0.127927928 | 0.197338  |
| biological_process | cell recognition                                                                                         | GO:0008037 | 16483 | 54   | 1.125496981 | 0.0548085 | 0.138738739 | 0.119493 | 1.09721186  | 0.107616    | 0.227027027 | 0.271791  |
| molecular_function | tubulin binding                                                                                          | GO:0015631 | 16711 | 150  | 1.075041213 | 0.0549084 | 0.190990991 | 0.135417 | 1.078583698 | 0.0470142   | 0.198198198 | 0.0805455 |
| biological_process | glycolipid metabolic process                                                                             | GO:0006664 | 16468 | 69   | 1.110871755 | 0.0549672 | 0.032432432 | 0.119453 | 1.000956763 | 0.494521    | 0.475675676 | -1        |
| biological_process | endocrine pancreas development                                                                           | GO:0031018 | 16496 | 41   | 1.143790899 | 0.0551676 | 0.084684685 | 0.119424 | 1.138021462 | 0.0626846   | 0.07027027  | 0.210061  |
| biological_process | cellular nitrogen compound catabolic process                                                             | GO:0044270 | 15820 | 717  | 1.033672049 | 0.0551847 | 0.207207207 | 0.119353 | 1.049015657 | 0.0100596   | 0.082882883 | 0.0805799 |
| biological_process | T cell selection                                                                                         | GO:0045058 | 16508 | 29   | 1.170899747 | 0.0553071 | 0.041441441 | 0.119306 | 1.228706203 | 0.016376    | 0.05045045  | 0.11129   |
| biological_process | spindle localization                                                                                     | GO:0051653 | 16514 | 23   | 1.191825682 | 0.0554091 | 0.095495495 | 0.119255 | 1.233027372 | 0.0263714   | 0.082882883 | 0.136957  |
| biological_process | positive regulation of multicellular organism growth                                                     | GO:0040018 | 16511 | 26   | 1.179850788 | 0.0559577 | 0.086486486 | 0.119846 | 1.15688728  | 0.0827714   | 0.153153153 | 0.243874  |
| biological_process | cellular response to dsRNA                                                                               | GO:0071359 | 16512 | 25   | 1.183339269 | 0.0560348 | 0.113513514 | 0.119789 | 0.977388653 | 0.577704    | 0.56036036  | -1        |
| biological_process | transcription, DNA-dependent                                                                             | GO:0006351 | 13845 | 2692 | 1.06164625  | 0.056209  | 0.381981982 | 0.119753 | 0.051901253 | 1.72E-07    | 0.163963964 | 0         |
| biological_process | tumor necrosis factor production                                                                         | GO:0032640 | 16472 | 65   | 1.113195684 | 0.0566207 | 0.081081081 | 0.12078  | 0.946814675 | 0.771633    | 0.724324324 | -1        |
| biological_process | regulation of tumor necrosis factor production                                                           | GO:0032680 | 16472 | 65   | 1.113195684 | 0.0566207 | 0.081081081 | 0.12078  | 0.946814675 | 0.771633    | 0.724324324 | -1        |
| molecular_function | protein phosphatase inhibitor activity                                                                   | GO:0004864 | 16834 | 27   | 1.15705932  | 0.0567516 | 0.054054054 | 0.139338 | 1.198553727 | 0.0368523   | 0.028828829 | 0.0594402 |
| biological_process | hormone transport                                                                                        | GO:0009914 | 16356 | 181  | 1.067499857 | 0.0568717 | 0.201801802 | 0.120761 | 1.084063139 | 0.0244372   | 0.171171171 | 0.134873  |
| biological_process | regulation of ion transmembrane transporter activity                                                     | GO:0032412 | 16466 | 71   | 1.108075734 | 0.0569742 | 0.308108108 | 0.12071  | 1.235296607 | 0.000289283 | 0.014414414 | 0.014315  |
| biological_process | regulation of macromolecule biosynthetic process                                                         | GO:0010566 | 13664 | 2873 | 1.015466828 | 0.0571397 | 0.389189189 | 0.120672 | 1.055165005 | 0.0576757   | 0.156756757 | 0         |
| biological_process | positive regulation of cAMP metabolic process                                                            | GO:0030816 | 16490 | 47   | 1.132696223 | 0.0572929 | 0.088288288 | 0.120557 | 1.153849382 | 0.0336656   | 0.081081081 | 0.153352  |
| biological_process | positive regulation of cAMP biosynthetic process                                                         | GO:0030819 | 16490 | 47   | 1.132696223 | 0.0572929 | 0.088288288 | 0.120557 | 1.153849382 | 0.0336656   | 0.081081081 | 0.153352  |
| biological_process | positive regulation of leukocyte activation                                                              | GO:0002696 | 16372 | 165  | 1.070485851 | 0.0575067 | 0.102702703 | 0.12053  | 1.130395826 | 0.00177463  | 0.003603604 | 0.0434233 |
| biological_process | response to isoproterenol alkaloid                                                                       | GO:0014072 | 16508 | 29   | 1.168677063 | 0.0576642 | 0.245045045 | 0.120491 | 1.120174186 | 0.130958    | 0.185585586 | 0.31064   |
| molecular_function | Rab guanyl-nucleotide exchange factor activity                                                           | GO:0017112 | 16839 | 22   | 1.193173147 | 0.0581623 | 0.10990991  | 0.139218 | 1.188056744 | 0.0631576   | 0.113513514 | 0.105114  |
| biological_process | positive regulation of multicellular organismal metabolic process                                        | GO:0044253 | 16512 | 25   | 1.181162457 | 0.0581968 | 0.090909099 | 0.122154 | 0.959514607 | 0.637183    | 0.704504505 | -1        |
| biological_process | immune response-regulating cell surface receptor signaling pathway                                       | GO:0002768 | 16451 | 86   | 1.097393157 | 0.0583908 | 0.043243243 | 0.122122 | 1.030771174 | 0.310125    | 0.275675676 | -1        |
| biological_process | regulation of coagulation                                                                                | GO:0050818 | 16486 | 51   | 1.126422034 | 0.0586542 | 0.095495495 | 0.122644 | 0.95066928  | 0.119457    | 0.108108108 | 0.292258  |
| biological_process | T cell proliferation                                                                                     | GO:0042098 | 16420 | 117  | 1.083248289 | 0.0587666 | 0.081081081 | 0.122594 | 1.040435583 | 0.223584    | 0.246846847 | 0.422787  |
| biological_process | negative regulation of histone modification                                                              | GO:0031057 | 16516 | 21   | 1.196682321 | 0.0591319 | 0.081081081 | 0.123675 | 1.239199263 | 0.0436889   | 0.075675676 | 0.142779  |
| biological_process | receptor metabolic process                                                                               | GO:0043112 | 16439 | 98   | 1.090605097 | 0.0595986 | 0.210810811 | 0.12424  | 1.152472714 | 0.0481133   | 0.037837838 | 0.0575827 |
| biological_process | purine nucleoside metabolic process                                                                      | GO:0042278 | 15917 | 620  | 1.035442829 | 0.059622  | 0.223423423 | 0.124169 | 1.037842003 | 0.0481133   | 0.144144144 | 0.182273  |
| biological_process | positive regulation of myeloid cell differentiation                                                      | GO:0045639 | 16484 | 53   | 1.123337747 | 0.0596506 | 0.100900901 | 0.1241   | 1.24607892  | 0.000941953 | 0.010810811 | 0.0375345 |
| biological_process | anterior/posterior axis specification                                                                    | GO:0009948 | 16502 | 35   | 1.151854964 | 0.0596534 | 0.066666667 | 0.124025 | 1.109151438 | 0.131435    | 0.266666667 | 0.310953  |
| cellular_component | recycling endosome membrane                                                                              | GO:0055038 | 16794 | 29   | 1.166839461 | 0.0596713 | 0.158558559 | 0.108303 | 1.122616898 | 0.126169    | 0.194594595 | 0.226661  |
| molecular_function | peptide binding                                                                                          | GO:0042277 | 16721 | 140  | 1.075622967 | 0.0598237 | 0.068486486 | 0.146849 | 0.924674838 | 0.939464    | 0.913513514 | -1        |
| biological_process | response to metal ion                                                                                    | GO:0010038 | 16301 | 236  | 1.058070084 | 0.0598293 | 0.165765766 | 0.124523 | 1.046048424 | 0.108583    | 0.169369369 | 0.274288  |
| biological_process | columnar/cuboidal epithelial cell differentiation                                                        | GO:0002065 | 16473 | 64   | 1.112033554 | 0.059928  | 0.10990991  | 0.125004 | 1.095066891 | 0.0934478   | 0.171171171 | 0.254027  |
| biological_process | positive regulation of neural precursor cell proliferation                                               | GO:2000179 | 16506 | 31   | 1.161060104 | 0.060014  | 0.156756757 | 0.12548  | 1.142955112 | 0.0838103   | 0.135135135 | 0.243781  |
| biological_process | fibroblast migration                                                                                     | GO:0010761 | 16517 | 20   | 1.200433291 | 0.060154  | 0.147747748 | 0.126499 | 1.114552005 | 0.187317    | 0.254054054 | 0.381683  |
| biological_process | regulation of transporter activity                                                                       | GO:0032409 | 16455 | 82   | 1.098794599 | 0.0601677 | 0.30990991  | 0.126425 | 1.188620546 | 0.0015096   | 0.021621622 | 0.0429711 |
| biological_process | positive regulation of cell death                                                                        | GO:0010942 | 16129 | 408  | 1.043823513 | 0.0602861 | 0.081081081 | 0.126906 | 1.013175042 | 0.320374    | 0.36036036  | -1        |
| biological_process | regulation of catecholamine secretion                                                                    | GO:0050433 | 16505 | 32   | 1.158260579 | 0.0603163 | 0.203603604 | 0.126836 | 1.079876446 | 0.216709    | 0.277477477 | 0.416201  |
| biological_process | positive regulation of defense response                                                                  | GO:0031349 | 16405 | 132  | 1.077659437 | 0.0603776 | 0.100900901 | 0.126773 | 0.953042439 | 0.825963    | 0.763963964 | -1        |
| biological_process | startle response                                                                                         | GO:0001964 | 16516 | 21   | 1.195138973 | 0.0605894 | 0.156756757 | 0.126744 | 1.172409138 | 0.0854508   | 0.171171171 | 0.243793  |
| molecular_function | acetylglucosaminyltransferase activity                                                                   | GO:0008375 | 16827 | 34   | 1.153248207 | 0.060653  | 0.088288288 | 0.150279 | 1.132058885 | 0.0909233   | 0.091891892 | 0.163159  |
| molecular_function | 3',5'-cyclic-nucleotide phosphodiesterase activity                                                       | GO:0004114 | 16838 | 23   | 1.186362685 | 0.0606765 | 0.122522523 | 0.149627 | 1.009731814 | 0.467773    | 0.448648649 | -1        |
| molecular_function | transferase activity, transferring sulfur-containing groups                                              | GO:0016782 | 16801 | 60   | 1.11522034  | 0.0607361 | 0.162162162 | 0.148993 | 0.878423446 | 0.948881    | 0.969369369 | -1        |
| biological_process | response to vitamin D                                                                                    | GO:0033280 | 16512 | 25   | 1.178680891 | 0.0607408 | 0.144144144 | 0.126702 | 0.853333458 | 0.989172    | 0.706306306 | -1        |
| cellular_component | AP-type membrane coat adaptor complex                                                                    | GO:0030119 | 16788 | 35   | 1.150758039 | 0.0609989 | 0.163963964 | 0.113597 | 1.168980317 | 0.0415154   | 0.102702703 | 0.0349711 |
| biological_process | granulocyte differentiation                                                                              | GO:0030851 | 16513 | 24   | 1.181671387 | 0.0614585 | 0.048648649 | 0.12943  | 1.219039996 | 0.0314451   | 0.059459459 | 0.148689  |
| biological_process | regulation of cell adhesion mediated by integrin                                                         | GO:0033628 | 16507 | 30   | 1.162333032 | 0.061     |             |          |             |             |             |           |

|                    |                                                                                                                               |            |       |      |             |             |             |          |             |            |             |            |
|--------------------|-------------------------------------------------------------------------------------------------------------------------------|------------|-------|------|-------------|-------------|-------------|----------|-------------|------------|-------------|------------|
| biological_process | positive regulation of JAK-STAT cascade                                                                                       | GO:0046427 | 16497 | 40   | 1.139784886 | 0.0626243   | 0.052252252 | 0.129968 | 1.148238173 | 0.0519933  | 0.133333333 | 0.18783    |
| biological_process | regulation of fat cell differentiation                                                                                        | GO:0045598 | 16475 | 62   | 1.112202765 | 0.0626255   | 0.10990991  | 0.12989  | 1.173769878 | 0.00878957 | 0.061261261 | 0.0776575  |
| biological_process | odontogenesis of dentin-containing tooth                                                                                      | GO:0042475 | 16474 | 63   | 1.111295233 | 0.0626426   | 0.104504505 | 0.129816 | 1.273442783 | 8.28E-05   | 0.023423423 | 0.00592147 |
| molecular_function | ligand-dependent nuclear receptor binding                                                                                     | GO:0016922 | 16839 | 22   | 1.188558141 | 0.0626538   | 0.077477477 | 0.149058 | 1.224793486 | 0.0338161  | 0.030630631 | 0.0511186  |
| biological_process | response to glucose stimulus                                                                                                  | GO:0009749 | 16418 | 119  | 1.080814669 | 0.0626973   | 0.127927928 | 0.130274 | 1.140285746 | 0.00390394 | 0.003603604 | 0.0593857  |
| biological_process | circadian behavior                                                                                                            | GO:0048512 | 16513 | 24   | 1.18040158  | 0.0627783   | 0.14954955  | 0.130214 | 1.079920536 | 0.248693   | 0.266666667 | 0.45753    |
| biological_process | response to amino acid stimulus                                                                                               | GO:0043200 | 16452 | 85   | 1.095627967 | 0.0628881   | 0.082882883 | 0.130162 | 0.993001945 | 0.54463    | 0.547747748 | -1         |
| biological_process | face morphogenesis                                                                                                            | GO:0060325 | 16507 | 30   | 1.161155941 | 0.0629788   | 0.158558559 | 0.130105 | 1.097943735 | 0.176187   | 0.236036036 | 0.370009   |
| molecular_function | protein kinase C binding                                                                                                      | GO:0005080 | 16817 | 44   | 1.132886935 | 0.0631605   | 0.012612613 | 0.148596 | 1.042411791 | 0.312809   | 0.290090009 | -1         |
| biological_process | regulation of cardiac muscle cell contraction                                                                                 | GO:0086004 | 16515 | 22   | 1.187747863 | 0.0634703   | 0.14954955  | 0.132222 | 1.330158652 | 0.00363702 | 0.034234234 | 0.0588933  |
| biological_process | B cell activation                                                                                                             | GO:0042113 | 16387 | 150  | 1.071209257 | 0.0634783   | 0.138738739 | 0.132404 | 1.056568179 | 0.114016   | 0.144141414 | 0.282666   |
| biological_process | female gamete generation                                                                                                      | GO:0007292 | 16454 | 83   | 1.095864641 | 0.0646957   | 0.169369369 | 0.132352 | 1.053629532 | 0.198121   | 0.257657658 | 0.393808   |
| biological_process | forebrain generation of neurons                                                                                               | GO:0021872 | 16493 | 44   | 1.131387119 | 0.0653277   | 0.198198198 | 0.132422 | 1.215111931 | 0.00666638 | 0.025225225 | 0.0686853  |
| biological_process | purine ribonucleoside metabolic process                                                                                       | GO:0046128 | 15921 | 616  | 1.034490315 | 0.0653984   | 0.228828829 | 0.132359 | 1.035263822 | 0.0611878  | 0.162162162 | 0.206655   |
| cellular_component | early endosome                                                                                                                | GO:0005769 | 16652 | 171  | 1.066355237 | 0.0654328   | 0.272072072 | 0.11411  | 1.086230781 | 0.024814   | 0.12972973  | 0.0156959  |
| biological_process | actin cytoskeleton reorganization                                                                                             | GO:0031532 | 16489 | 48   | 1.125658786 | 0.065511    | 0.153153153 | 0.132306 | 1.139606508 | 0.0467024  | 0.135135135 | 0.180655   |
| biological_process | T cell activation                                                                                                             | GO:0042110 | 16268 | 269  | 1.052624892 | 0.065876    | 0.165765766 | 0.133351 | 1.13017551  | 9.63E-05   | 0.016216216 | 0.00870287 |
| molecular_function | channel regulator activity                                                                                                    | GO:0016247 | 16807 | 54   | 1.118076863 | 0.0661226   | 0.230630631 | 0.156446 | 1.114175913 | 0.0727551  | 0.201801802 | 0.116429   |
| biological_process | positive regulation of chromosome organization                                                                                | GO:2001252 | 16495 | 42   | 1.133707376 | 0.0664507   | 0.189189189 | 0.134443 | 1.270633467 | 0.00117605 | 0.01981982  | 0.0415482  |
| biological_process | response to inorganic substance                                                                                               | GO:0010035 | 16191 | 346  | 1.046100141 | 0.0666893   | 0.14954955  | 0.135452 | 1.022741702 | 0.229526   | 0.288282888 | 0.428622   |
| biological_process | glycerolipid biosynthetic process                                                                                             | GO:0045017 | 16416 | 121  | 1.078481488 | 0.0667014   | 0.072072072 | 0.135374 | 0.963695126 | 0.756265   | 0.823423423 | -1         |
| molecular_function | glycoprotein binding                                                                                                          | GO:0001948 | 16803 | 58   | 1.11340404  | 0.0670013   | 0.142342342 | 0.156109 | 1.18690541  | 0.00676032 | 0.046846847 | 0          |
| biological_process | spinal cord motor neuron differentiation                                                                                      | GO:0021522 | 16515 | 22   | 1.184009903 | 0.0673412   | 0.077477477 | 0.138531 | 1.242294598 | 0.0244349  | 0.027027027 | 0.13523    |
| biological_process | negative regulation of growth                                                                                                 | GO:0045926 | 16371 | 166  | 1.066630666 | 0.0675311   | 0.14954955  | 0.138495 | 1.112163049 | 0.00594014 | 0.045045045 | 0.0655006  |
| biological_process | granulocyte chemotaxis                                                                                                        | GO:0071621 | 16484 | 53   | 1.117882026 | 0.0682691   | 0.084684685 | 0.139106 | 1.222531015 | 0.00247295 | 0.009009009 | 0.0501089  |
| molecular_function | O-acyltransferase activity                                                                                                    | GO:0008374 | 16824 | 37   | 1.14111124  | 0.068329    | 0.084684685 | 0.155947 | 0.975406703 | 0.602345   | 0.547747748 | 0          |
| biological_process | regulation of RNA biosynthetic process                                                                                        | GO:2001141 | 13932 | 2605 | 1.015418569 | 0.0688179   | 0.398198198 | 0.140181 | 1.05910801  | 6.25E-09   | 0.158558559 | 0          |
| biological_process | cytokine secretion                                                                                                            | GO:0050663 | 16457 | 80   | 1.09547013  | 0.0690925   | 0.133333333 | 0.140676 | 0.907494843 | 0.924593   | 0.951351351 | -1         |
| biological_process | RNA biosynthetic process                                                                                                      | GO:0032774 | 13833 | 2704 | 1.015058523 | 0.069111    | 0.390990991 | 0.140597 | 1.051370033 | 2.11E-07   | 0.162162162 | 0          |
| biological_process | response to acid                                                                                                              | GO:0001101 | 16435 | 102  | 1.084479274 | 0.0691258   | 0.099099099 | 0.140517 | 0.994516229 | 0.538357   | 0.556756757 | -1         |
| biological_process | response to pain                                                                                                              | GO:0048265 | 16509 | 28   | 1.160823948 | 0.0700774   | 0.178378378 | 0.143719 | 1.241568994 | 0.0133491  | 0.048468469 | 0.097984   |
| biological_process | regulation of protein export from nucleus                                                                                     | GO:0046825 | 16517 | 20   | 1.189936219 | 0.0704942   | 0.075675676 | 0.144751 | 1.084608745 | 0.255995   | 0.218018018 | 0.467382   |
| biological_process | cholesterol metabolic process                                                                                                 | GO:0008203 | 16444 | 93   | 1.087871622 | 0.0705289   | 0.151351351 | 0.145179 | 1.050582336 | 0.198432   | 0.236036036 | 0.393896   |
| biological_process | hormone secretion                                                                                                             | GO:0046879 | 16362 | 175  | 1.063749356 | 0.070992    | 0.210810811 | 0.145716 | 1.085849182 | 0.0239887  | 0.18018018  | 0.133365   |
| biological_process | regulation of gene expression                                                                                                 | GO:0010468 | 13508 | 3029 | 1.013921264 | 0.396396396 | 0.145645    | 0.145645 | 1.055583409 | 2.28E-09   | 0.124324324 | 0          |
| molecular_function | protein complex scaffold                                                                                                      | GO:0032947 | 16821 | 40   | 1.133780823 | 0.0711532   | 0.023423423 | 0.170773 | 1.007840759 | 0.465744   | 0.455855856 | -1         |
| biological_process | mesenchyme morphogenesis                                                                                                      | GO:0072132 | 16515 | 22   | 1.180392877 | 0.0712581   | 0.064684685 | 0.146115 | 0.998991865 | 0.503289   | 0.463063063 | -1         |
| biological_process | regulation of myeloid leukocyte differentiation                                                                               | GO:0002761 | 16470 | 67   | 1.103221391 | 0.0712739   | 0.073873874 | 0.146033 | 1.089391595 | 0.102061   | 0.097297297 | 0.263719   |
| biological_process | divalent metal ion transport                                                                                                  | GO:0070838 | 16294 | 243  | 1.053877672 | 0.071394    | 0.331531532 | 0.145978 | 1.089545739 | 0.00743249 | 0.214414414 | 0.0756901  |
| biological_process | positive regulation of fibroblast proliferation                                                                               | GO:0048146 | 16500 | 37   | 1.138515242 | 0.0720117   | 0.03963964  | 0.148056 | 0.996852492 | 0.513263   | 0.554954955 | -1         |
| biological_process | acidic amino acid transport                                                                                                   | GO:0015800 | 16517 | 20   | 1.188448731 | 0.0720638   | 0.113513514 | 0.147983 | 0.972720601 | 0.583747   | 0.547747748 | -1         |
| biological_process | proximal/distal pattern formation                                                                                             | GO:0009954 | 16514 | 23   | 1.175667846 | 0.0721158   | 0.203603604 | 0.14791  | 0.976847079 | 0.576329   | 0.538738739 | -1         |
| molecular_function | amide binding                                                                                                                 | GO:0033218 | 16712 | 149  | 1.068667851 | 0.0723864   | 0.077477477 | 0.181035 | 0.941699463 | 0.89218    | 0.893693694 | -1         |
| biological_process | heterophilic cell-cell adhesion                                                                                               | GO:0007157 | 16511 | 26   | 1.164799155 | 0.0726132   | 0.232432432 | 0.147951 | 1.496456021 | 5.72E-06   | 0.012612613 | 0          |
| biological_process | response to fluid shear stress                                                                                                | GO:0034405 | 16517 | 20   | 1.187886388 | 0.0726642   | 0.142342342 | 0.147877 | 1.283000985 | 0.0141374  | 0.052252252 | 0.10041    |
| biological_process | negative regulation of cell cycle                                                                                             | GO:0045786 | 16356 | 181  | 1.062148026 | 0.0726791   | 0.102702703 | 0.147794 | 1.059001069 | 0.0834169  | 0.189189189 | 0.243588   |
| molecular_function | paired donors, with incorporation or reduction of molecular oxygen, NAD(P)H as one donor, and incorporation of a second donor | GO:0016709 | 16836 | 25   | 1.167938122 | 0.0727679   | 0.099099099 | 0.180442 | 1.012430965 | 0.457112   | 0.45045045  | -1         |
| biological_process | response to morphine                                                                                                          | GO:0043278 | 16509 | 28   | 1.158521883 | 0.0729596   | 0.245045045 | 0.14828  | 1.112886571 | 0.150223   | 0.189189189 | 0.34157    |
| biological_process | regulation of binding                                                                                                         | GO:0051098 | 16373 | 164  | 1.065104154 | 0.0733595   | 0.05045045  | 0.148795 | 1.074388051 | 0.048639   | 0.109090901 | 0.181819   |
| biological_process | lipopolysaccharide-mediated signaling pathway                                                                                 | GO:0031663 | 16500 | 37   | 1.137413762 | 0.0736195   | 0.138738739 | 0.149273 | 0.971649191 | 0.617564   | 0.594594595 | -1         |
| biological_process | oocyte development                                                                                                            | GO:0048599 | 16507 | 30   | 1.152311634 | 0.0740527   | 0.205405405 | 0.149298 | 1.055878856 | 0.297862   | 0.259459459 | -1         |
| biological_process | lymphocyte migration                                                                                                          | GO:0072676 | 16511 | 26   | 1.163427019 | 0.0743029   | 0.16036036  | 0.149276 | 1.204474813 | 0.0353599  | 0.104504505 | 0.157693   |
| biological_process | regulation of cardiac muscle tissue development                                                                               | GO:0055024 | 16500 | 37   | 1.136930026 | 0.0743342   | 0.052252252 | 0.149197 | 1.07847641  | 0.203921   | 0.29009009  | 0.401315   |
| molecular_function | core promoter proximal region DNA binding                                                                                     | GO:0001159 | 16821 | 40   | 1.131298909 | 0.0749287   | 0.064864865 | 0.18405  | 1.238205039 | 0.00449336 | 0.046846847 | 0          |
| biological_process | regulation of phosphoprotein phosphatase activity                                                                             | GO:0043666 | 16509 | 28   | 1.156828807 | 0.0751367   | 0.210810811 | 0.149318 | 1.309810327 | 0.00224234 | 0.025225225 | 0.0497234  |
| biological_process | activation of MAPKK activity                                                                                                  | GO:0000186 | 16507 | 30   | 1.151493314 | 0.0751482   | 0           | 0.149233 | 1.190788804 | 0.0350222  | 0.073873874 | 0.156604   |
| biological_process | regulation of erythrocyte differentiation                                                                                     | GO:0045646 | 16508 | 29   | 1.154010687 | 0.0752503   | 0.117171717 | 0.149172 | 1.318355834 | 0.00147903 | 0.005405405 | 0.0431185  |
| biological_process | establishment of protein localization                                                                                         | GO:0045184 | 15389 | 1148 | 1.023593661 | 0.0756173   | 0.327927928 | 0.150175 | 1.02148469  | 0.095632   | 0.212612613 | 0.256306   |
| biological_process | regulation of multicellular organismal metabolic process                                                                      | GO:0044246 | 16508 | 29   | 1.153572822 | 0.0758321   | 0.133333333 | 0.150143 | 0.954995011 | 0.662834   | 0.772972973 | -1         |
| biological_process | intracellular receptor signaling pathway                                                                                      | GO:0030522 | 16415 | 122  | 1.074667176 | 0.0758381   | 0.196396396 | 0.150057 | 1.135659549 | 0.00459396 | 0.075675676 | 0.0594455  |
| biological_process | interleukin-6 production                                                                                                      | GO:0032635 | 16471 | 66   | 1.101675832 | 0.0758506   | 0.072072072 | 0.149885 | 0.914112682 | 0.887062   | 0.753153153 | -1         |
| biological_process | regulation of interleukin-6 production                                                                                        | GO:0032675 | 16471 | 66   | 1.101675832 | 0.0758506   | 0.072072072 | 0.149885 | 0.914112682 | 0.887062   | 0.753153153 | -1         |
| biological_process | histone demethylation                                                                                                         | GO:0016577 | 16517 | 20   | 1.184615123 | 0.0762327   | 0.12972973  | 0.150392 | 1.422709998 | 0.00052585 | 0.007207207 | 0.0281728  |
| biological_process | regulation of pH                                                                                                              | GO:0006885 | 16496 | 41   | 1.128848175 | 0.0762502   | 0.075675676 | 0.150309 | 0.905665938 | 0.852588   | 0.895495495 | -1         |
| biological_process | myeloid leukocyte mediated immunity                                                                                           | GO:0002444 | 16496 | 41   | 1.128691845 | 0.0764993   | 0.104504505 | 0.150287 | 1.004200608 | 0.481419   | 0.457657658 | -1         |
| biological_process | nucleobase-containing small molecule metabolic process                                                                        | GO:0055086 | 15616 | 921  | 1.026249144 | 0.0778426   | 0.241441441 | 0.151044 | 1.020350821 | 0.135525   | 0.232432432 | 0.318513   |
| biological_process | neuron fate commitment                                                                                                        | GO:0048663 | 16492 | 45   | 1.122023039 | 0.077848    | 0.079279279 | 0.150958 | 1.08011     | 0.175659   | 0.063063063 | 0.369773   |
| biological_process | defense response to virus                                                                                                     | GO:0051607 | 16435 | 102  | 1.080877338 | 0.0779307   | 0.111717172 | 0.150891 | 0.914063101 | 0.934229   | 0.962162162 | -1         |
| biological_process | nephron epithelium morphogenesis                                                                                              | GO:0072088 | 16511 | 26   | 1.16054786  | 0.0779459   | 0.106306306 | 0.150807 | 1.132156276 | 0.121389   | 0.187387387 | 0.296053   |
| biological_process | endoderm formation                                                                                                            | GO:0001706 | 16513 | 24   | 1.166730999 | 0.0784206   | 0.140540541 | 0.152324 | 1.079482151 | 0.249874   | 0.315315315 | 0.458864   |
| cellular_component | PML body                                                                                                                      | GO:0016605 | 16752 | 71   | 1.096747021 | 0.0785362   | 0.203603604 | 0.134027 | 1.175203058 | 0.0051965  | 0.100909091 | 0          |
| biological_process | neutrophil chemotaxis                                                                                                         | GO:0030593 | 16493 | 44   | 1.122674373 | 0.0790804   | 0.095495495 | 0.152902 | 1.13303347  | 0.0629511  | 0.03963964  | 0.210566   |
| biological_process | chromatin assembly or disassembly                                                                                             | GO:0006333 | 16406 | 131  | 1.070847562 | 0.0792641   | 0.41981982  | 0.152862 | 0.978189956 | 0.667913   | 0.562162162 | -1         |
| biological_process |                                                                                                                               |            |       |      |             |             |             |          |             |            |             |            |

|                    |                                                                         |            |       |      |             |           |             |          |             |             |             |           |
|--------------------|-------------------------------------------------------------------------|------------|-------|------|-------------|-----------|-------------|----------|-------------|-------------|-------------|-----------|
| biological_process | carbohydrate derivative transport                                       | GO:1901264 | 16504 | 33   | 1.140469995 | 0.0809002 | 0.018018018 | 0.155613 | 1.072560053 | 0.234947    | 0.156756757 | 0.433662  |
| biological_process | gluconeogenesis                                                         | GO:0006094 | 16501 | 36   | 1.134441618 | 0.0809564 | 0.106360306 | 0.156026 | 1.12428988  | 0.097997    | 0.106360306 | 0.260867  |
| biological_process | positive regulation of muscle cell differentiation                      | GO:0051149 | 16499 | 38   | 1.130723428 | 0.0811563 | 0.160360306 | 0.15599  | 1.101043677 | 0.140056    | 0.214414414 | 0.327146  |
| biological_process | regulation of lymphocyte mediated immunity                              | GO:0002706 | 16465 | 72   | 1.094830692 | 0.0812457 | 0.145945946 | 0.155923 | 0.947128277 | 0.781961    | 0.781981982 | -1        |
| biological_process | phagocytosis                                                            | GO:0006909 | 16450 | 87   | 1.086016583 | 0.0817671 | 0.201801802 | 0.15646  | 1.0750519   | 0.112055    | 0.165765766 | 0.277605  |
| biological_process | antigen processing and presentation of exogenous peptide antigen        | GO:0002478 | 16516 | 21   | 1.175415212 | 0.0817814 | 0.154954955 | 0.156374 | 1.005220751 | 0.483482    | 0.499099099 | -1        |
| biological_process | positive regulation of histone modification                             | GO:0031058 | 16503 | 34   | 1.137615543 | 0.0820724 | 0.201801802 | 0.157334 | 1.242785448 | 0.00705301  | 0.027027027 | 0.0740234 |
| molecular_function | ADP binding                                                             | GO:0043531 | 16840 | 21   | 1.17510849  | 0.0821491 | 0.18018018  | 0.195079 | 1.110844479 | 0.189336    | 0.291891892 | 0.353356  |
| biological_process | protein demethylation                                                   | GO:0006482 | 16516 | 21   | 1.174994822 | 0.0822873 | 0.135135135 | 0.157211 | 1.391374557 | 0.000940364 | 0.007207207 | 0.0376084 |
| biological_process | protein dealkylation                                                    | GO:0008214 | 16516 | 21   | 1.174994822 | 0.0822873 | 0.135135135 | 0.157211 | 1.391374557 | 0.000940364 | 0.007207207 | 0.0376084 |
| molecular_function | hormone binding                                                         | GO:0042562 | 16809 | 52   | 1.111026413 | 0.0824345 | 0.140540541 | 0.194404 | 1.003878274 | 0.480667    | 0.468468468 | -1        |
| biological_process | negative regulation of T cell activation                                | GO:0050868 | 16478 | 59   | 1.104111096 | 0.0826348 | 0.183783784 | 0.157213 | 1.045404809 | 0.272553    | 0.308108108 | 0.48903   |
| biological_process | regulation of cellular macromolecule biosynthetic process               | GO:2000112 | 13721 | 2816 | 1.013754231 | 0.0826554 | 0.403603604 | 0.157129 | 1.056398929 | 6.32E-09    | 1.144144144 | 0         |
| biological_process | negative regulation of cell-substrate adhesion                          | GO:0010812 | 16509 | 28   | 1.151248566 | 0.0826632 | 0.212612613 | 0.15704  | 1.143681552 | 0.0937577   | 0.192792793 | 0.254762  |
| molecular_function | magnesium ion binding                                                   | GO:0000287 | 16692 | 169  | 1.061285498 | 0.082729  | 0.192792793 | 0.193738 | 0.997923913 | 0.518771    | 0.495495495 | -1        |
| biological_process | positive regulation of neuron differentiation                           | GO:0045666 | 16472 | 65   | 1.099094778 | 0.0827988 | 0.167567568 | 0.156986 | 1.075015887 | 0.146957    | 0.27027027  | 0.336945  |
| biological_process | positive regulation of endocytosis                                      | GO:0045807 | 16466 | 71   | 1.094629916 | 0.0831748 | 0.183783784 | 0.157481 | 1.177522514 | 0.00470971  | 0.063063063 | 0.0589035 |
| biological_process | regulation of DNA metabolic process                                     | GO:0051052 | 16356 | 181  | 1.058994387 | 0.0834553 | 0.18018018  | 0.15795  | 1.082847117 | 0.0261237   | 0.021621622 | 0.137345  |
| biological_process | positive regulation of cell killing                                     | GO:0031343 | 16505 | 32   | 1.14076294  | 0.0837145 | 0.072072072 | 0.157929 | 1.042126139 | 0.339763    | 0.390990991 | -1        |
| molecular_function | phosphatase regulator activity                                          | GO:0019208 | 16808 | 53   | 1.109282941 | 0.0837634 | 0.214414414 | 0.199997 | 1.187536427 | 0.0089298   | 0.003603604 | 0         |
| biological_process | aminoglycan biosynthetic process                                        | GO:0006023 | 16493 | 44   | 1.119956106 | 0.0837916 | 0.117117117 | 0.158343 | 1.114151274 | 0.0945531   | 0.2         | 0.255997  |
| biological_process | monocyte chemotaxis                                                     | GO:0002548 | 16517 | 20   | 1.177733978 | 0.0841723 | 0.176576577 | 0.159319 | 1.386683757 | 0.00136288  | 0.055855856 | 0.0437198 |
| biological_process | protein transport                                                       | GO:0015031 | 15427 | 1110 | 1.023043965 | 0.0843133 | 0.336936937 | 0.159266 | 1.018149951 | 0.139137    | 0.254054054 | 0.326629  |
| biological_process | tissue regeneration                                                     | GO:0042246 | 16498 | 39   | 1.126708044 | 0.0850068 | 0.091891892 | 0.161766 | 1.207938487 | 0.0121655   | 0.018018018 | 0.0943339 |
| biological_process | maintenance of location in cell                                         | GO:0051651 | 16454 | 83   | 1.086634317 | 0.0852681 | 0.153153153 | 0.161745 | 1.120629886 | 0.0281769   | 0.068468468 | 0.142578  |
| biological_process | multicellular organism reproduction                                     | GO:0032504 | 15961 | 576  | 1.032388012 | 0.0852888 | 0.158558559 | 0.161658 | 1.059306327 | 0.00604786  | 0.145945946 | 0.0651015 |
| molecular_function | estrogen receptor binding                                               | GO:0030331 | 16838 | 23   | 1.164765357 | 0.0854073 | 0.245045045 | 0.203201 | 1.316421093 | 0.00426629  | 0.027027027 | 0         |
| biological_process | regulation of proteasomal ubiquitin-dependent protein catabolic process | GO:0032434 | 16480 | 57   | 1.104532729 | 0.0854552 | 0.064864865 | 0.161612 | 1.112534368 | 0.0702285   | 0.016216216 | 0.220925  |
| biological_process | forebrain neuron differentiation                                        | GO:0021879 | 16500 | 37   | 1.129605348 | 0.0858139 | 0.0858139   | 0.162096 | 1.201956569 | 0.0165803   | 0.027027027 | 0.111679  |
| molecular_function | G-protein coupled peptide receptor activity                             | GO:0008528 | 16772 | 89   | 1.083382115 | 0.0859533 | 0.225225225 | 0.202635 | 0.984694623 | 0.599013    | 0.535135135 | -1        |
| biological_process | alpha-beta T cell differentiation                                       | GO:0046632 | 16475 | 62   | 1.099894803 | 0.0861387 | 0.064864865 | 0.162571 | 1.128314295 | 0.0397794   | 0.124324324 | 0.166053  |
| biological_process | regulation of fibroblast proliferation                                  | GO:0048145 | 16476 | 61   | 1.100693761 | 0.0861803 | 0.050405045 | 0.16249  | 1.0358315   | 0.313636    | 0.320720721 | -1        |
| biological_process | positive regulation of DNA replication                                  | GO:0045740 | 16497 | 40   | 1.124362777 | 0.08629   | 0.050405045 | 0.162427 | 1.143697101 | 0.0575106   | 0.063063063 | 0.198597  |
| biological_process | protein sumoylation                                                     | GO:0016925 | 16507 | 30   | 1.142786065 | 0.0875808 | 0.133333333 | 0.163645 | 1.205006612 | 0.0257894   | 0.01981982  | 0.136834  |
| biological_process | regulation of lipid biosynthetic process                                | GO:0046890 | 16453 | 84   | 1.085152372 | 0.0876816 | 0           | 0.16358  | 1.034888882 | 0.292104    | 0.367567568 | -1        |
| biological_process | nucleus organization                                                    | GO:0006997 | 16486 | 51   | 1.109377452 | 0.0877094 | 0.192792793 | 0.163494 | 1.10642524  | 0.0936812   | 0.136936937 | 0.254881  |
| molecular_function | transferase activity, transferring glycosyl groups                      | GO:0016757 | 16626 | 235  | 1.050631955 | 0.0878806 | 0.109909091 | 0.20594  | 1.094734674 | 0.0056518   | 0.037837838 | 0         |
| biological_process | cellular response to heat                                               | GO:0034605 | 16513 | 24   | 1.159394335 | 0.0879519 | 0.120720721 | 0.163468 | 1.124983571 | 0.144284    | 0.153153153 | 0.335734  |
| molecular_function | insulin-like growth factor binding                                      | GO:0005520 | 16838 | 23   | 1.162821184 | 0.0879591 | 0.14954955  | 0.205149 | 0.996499068 | 0.511619    | 0.488288288 | -1        |
| biological_process | ribonucleoside metabolic process                                        | GO:0009119 | 15904 | 633  | 1.030453273 | 0.0880162 | 0.270270272 | 0.163393 | 1.033257872 | 0.069741    | 0.158558559 | 0.221151  |
| biological_process | sequestration of calcium ion                                            | GO:0051208 | 16486 | 51   | 1.109183009 | 0.0880938 | 0.185585586 | 0.163797 | 1.098132961 | 0.112051    | 0.243243243 | 0.277763  |
| biological_process | multi-organism reproductive process                                     | GO:0044703 | 16267 | 270  | 1.046979456 | 0.0888283 | 0.136936937 | 0.164858 | 1.069746403 | 0.0226787   | 0.037837838 | 0.128551  |
| biological_process | regulation of JAK-STAT cascade                                          | GO:0046425 | 16480 | 57   | 1.102795098 | 0.0890671 | 0.036036036 | 0.165305 | 1.151013821 | 0.0239548   | 0.082882883 | 0.133591  |
| biological_process | aging                                                                   | GO:0007568 | 16307 | 230  | 1.050874466 | 0.0892093 | 0.154954955 | 0.165251 | 1.056279691 | 0.0682839   | 0.189189189 | 0.219769  |
| biological_process | negative regulation of cytokine-mediated signaling pathway              | GO:0001960 | 16517 | 20   | 1.173483147 | 0.089378  | 0.118918919 | 0.165678 | 1.341442344 | 0.00406739  | 0.061261261 | 0.0587463 |
| biological_process | response to interleukin-1                                               | GO:0070555 | 16471 | 66   | 1.095321299 | 0.0894822 | 0.158558559 | 0.165613 | 1.056182657 | 0.21415     | 0.295495495 | 0.413742  |
| biological_process | negative regulation of cysteine-type endopeptidase activity             | GO:2000117 | 16480 | 57   | 1.102585055 | 0.0895113 | 0.117117117 | 0.165527 | 1.024510483 | 0.374007    | 0.338738739 | -1        |
| biological_process | lymphocyte homeostasis                                                  | GO:0002260 | 16491 | 46   | 1.114044145 | 0.0898738 | 0.144144144 | 0.166007 | 1.102082132 | 0.114906    | 0.183783784 | 0.283915  |
| biological_process | specification of symmetry                                               | GO:0009799 | 16460 | 77   | 1.088047982 | 0.0899093 | 0.223423423 | 0.165923 | 1.200639114 | 0.00111933  | 0.03963964  | 0.0420912 |
| biological_process | sleep                                                                   | GO:0030431 | 16511 | 26   | 1.151752236 | 0.0899147 | 0.169369369 | 0.165831 | 1.070907852 | 0.265428    | 0.313513514 | 0.47881   |
| biological_process | regulation of defense response to virus                                 | GO:0050688 | 16507 | 30   | 1.140887401 | 0.090485  | 0.082882883 | 0.16731  | 0.924858951 | 0.762253    | 0.735135135 | -1        |
| biological_process | mesenchymal cell proliferation                                          | GO:0010463 | 16494 | 43   | 1.11749492  | 0.0907409 | 0.084684685 | 0.167758 | 1.194678942 | 0.0134139   | 0.122525253 | 0.0997768 |
| biological_process | positive regulation of Wnt receptor signaling pathway                   | GO:0030177 | 16468 | 69   | 1.092626494 | 0.0908682 | 0.144144144 | 0.167699 | 1.166806363 | 0.00808728  | 0.127927928 | 0.0768333 |
| molecular_function | MAP kinase kinase kinase activity                                       | GO:0004709 | 16841 | 20   | 1.171991024 | 0.0912596 | 0.131531532 | 0.218507 | 1.112490334 | 0.191642    | 0.257657658 | 0.35845   |
| biological_process | nucleoside metabolic process                                            | GO:0009116 | 15872 | 665  | 1.029179324 | 0.0917232 | 0.257657658 | 0.169722 | 1.034122161 | 0.059902    | 0.18018018  | 0.20479   |
| biological_process | monocarboxylic acid transport                                           | GO:0015718 | 16457 | 80   | 1.085601915 | 0.0918694 | 0.144144144 | 0.169668 | 0.980773294 | 0.617398    | 0.605405405 | -1        |
| biological_process | regulation of toll-like receptor signaling pathway                      | GO:0034121 | 16511 | 26   | 1.15023591  | 0.0921092 | 0.115315315 | 0.171042 | 0.976607234 | 0.581924    | 0.571171717 | -1        |
| biological_process | positive regulation of glucose metabolic process                        | GO:0010907 | 16512 | 25   | 1.153013857 | 0.0923987 | 0.100900901 | 0.171028 | 1.104993381 | 0.181429    | 0.245045045 | 0.376932  |
| biological_process | regulation of exocytosis                                                | GO:0017157 | 16452 | 85   | 1.082750629 | 0.0926184 | 0.268468468 | 0.172391 | 1.151731388 | 0.00756592  | 0.081081081 | 0.0764939 |
| biological_process | negative regulation of protein catabolic process                        | GO:0042177 | 16497 | 40   | 1.12076499  | 0.0926686 | 0.072072072 | 0.172309 | 1.162218144 | 0.0376069   | 0.028828829 | 0.161582  |
| biological_process | JAK-STAT cascade                                                        | GO:0007259 | 16461 | 76   | 1.087211054 | 0.0934396 | 0.133333333 | 0.172899 | 1.163634982 | 0.00663321  | 0.073873874 | 0.0687642 |
| biological_process | fibroblast proliferation                                                | GO:0048144 | 16474 | 63   | 1.0958176   | 0.0934564 | 0.043243243 | 0.172806 | 1.044167261 | 0.271489    | 0.291891892 | 0.488102  |
| biological_process | regulation of B cell activation                                         | GO:0050864 | 16462 | 75   | 1.087711105 | 0.0936458 | 0.118918919 | 0.172764 | 0.959130843 | 0.730561    | 0.711717172 | -1        |
| biological_process | sterol transport                                                        | GO:0015918 | 16486 | 51   | 1.106392042 | 0.09375   | 0.140540541 | 0.1726   | 1.17903307  | 0.0132793   | 0.005405405 | 0.0980651 |
| biological_process | cholesterol transport                                                   | GO:0030301 | 16486 | 51   | 1.106392042 | 0.09375   | 0.140540541 | 0.1726   | 1.17903307  | 0.0132793   | 0.005405405 | 0.0980651 |
| biological_process | multicellular organismal reproductive process                           | GO:0048609 | 15966 | 571  | 1.031257871 | 0.0939912 | 0.176576577 | 0.172573 | 1.059938927 | 0.00579077  | 0.14954955  | 0.0646612 |
| cellular_component | extrinsic to internal side of plasma membrane                           | GO:0031234 | 16773 | 50   | 1.107306824 | 0.0940519 | 0.09363964  | 0.155143 | 0.91971281  | 0.837646    | 0.899099099 | -1        |
| biological_process | regulation of cellular carbohydrate metabolic process                   | GO:0010675 | 16447 | 90   | 1.079732417 | 0.0944758 | 0.214414414 | 0.173079 | 1.14028945  | 0.010403    | 0.075675676 | 0.0850976 |
| biological_process | negative regulation of cell growth                                      | GO:0030308 | 16416 | 121  | 1.068626866 | 0.0947241 | 0.138738739 | 0.173054 | 1.149252869 | 0.00215772  | 0.016216216 | 0.0501178 |
| biological_process | nucleoside phosphate metabolic process                                  | GO:0006753 | 15655 | 882  | 1.024800543 | 0.0949274 | 0.272072072 | 0.173015 | 1.023155183 | 0.110466    | 0.198198198 | 0.276566  |
| biological_process | regulation of cytokine secretion                                        | GO:0050707 | 16467 | 70   | 1.090263273 | 0.0949642 | 0.205405405 | 0.172929 | 0.859709498 | 0.979197    | 0.981981982 | -1        |
| biological_process | actin filament depolymerization                                         | GO:0030042 | 16509 | 28   | 1.14285661  | 0.0950307 | 0.120720721 | 0.172851 | 1.137842168 | 0.103043    | 0.126126126 | 0.264383  |
| molecular_function | scavenger receptor activity                                             | GO:0005044 | 16823 | 38   | 1.122474796 | 0.0952395 | 0.106360306 | 0.219624 | 0.903370972 |             |             |           |

|                    |                                                                                           |            |       |      |              |           |             |          |             |            |             |           |
|--------------------|-------------------------------------------------------------------------------------------|------------|-------|------|--------------|-----------|-------------|----------|-------------|------------|-------------|-----------|
| biological_process | response to glucocorticoid stimulus                                                       | GO:0051384 | 16391 | 146  | 1.061634928  | 0.0975666 | 0.252252252 | 0.174848 | 0.977461545 | 0.682227   | 0.718918919 | -1        |
| biological_process | positive regulation of adenylate cyclase activity                                         | GO:0045762 | 16517 | 20   | 1.166535489  | 0.0983961 | 0.158558559 | 0.176372 | 1.168137864 | 0.0962593  | 0.257657658 | 0.257311  |
| biological_process | cardiac muscle cell contraction                                                           | GO:0086003 | 16514 | 23   | 1.155235257  | 0.0984622 | 0.194594595 | 0.176293 | 1.283998428 | 0.0091964  | 0.057657658 | 0.077825  |
| biological_process | very long-chain fatty acid metabolic process                                              | GO:0000038 | 16516 | 21   | 1.161617218  | 0.0996414 | 0.172972973 | 0.178376 | 1.005957873 | 0.481149   | 0.504504505 | -1        |
| biological_process | regulation of B cell differentiation                                                      | GO:0045577 | 16516 | 21   | 1.1616057    | 0.0996574 | 0.100900901 | 0.178281 | 0.999519577 | 0.501542   | 0.52972973  | -1        |
| biological_process | thymic T cell selection                                                                   | GO:0045061 | 16517 | 20   | 1.165574063  | 0.0996947 | 0.093693694 | 0.178193 | 1.224499159 | 0.0409283  | 0.095495495 | 0.167377  |
| biological_process | ruffle organization                                                                       | GO:0031529 | 16517 | 20   | 1.165428942  | 0.0998918 | 0.063063063 | 0.178152 | 0.989590895 | 0.532171   | 0.520720721 | -1        |
| molecular_function | sulfur compound binding                                                                   | GO:1901681 | 16731 | 130  | 1.064670444  | 0.0999153 | 0.218018018 | 0.230695 | 1.027481657 | 0.292943   | 0.403603604 | -1        |
| biological_process | negative regulation of cysteine-type endopeptidase activity involved in apoptotic process | GO:0043154 | 16482 | 55   | 1.099564983  | 0.100089  | 0.144144144 | 0.178111 | 1.029089041 | 0.354116   | 0.333333333 | -1        |
| molecular_function | hydrolase activity, acting on glycosyl bonds                                              | GO:0016798 | 16752 | 109  | 1.070582276  | 0.100183  | 0.091891892 | 0.229934 | 0.97273667  | 0.689571   | 0.747747748 | -1        |
| biological_process | humoral immune response                                                                   | GO:0006959 | 16475 | 62   | 1.093635493  | 0.100379  | 0.196396396 | 0.179011 | 0.845966546 | 0.982346   | 0.886486486 | -1        |
| biological_process | positive regulation of chemokine production                                               | GO:0032722 | 16511 | 26   | 1.144626432  | 0.100573  | 0.158558559 | 0.179425 | 0.812950961 | 0.950872   | 0.938738739 | -1        |
| molecular_function | growth factor receptor binding                                                            | GO:0070851 | 16775 | 86   | 1.079356225  | 0.100637  | 0.025225225 | 0.229273 | 1.068598577 | 0.13465    | 0.252252252 | 0.265785  |
| cellular_component | MHC protein complex                                                                       | GO:0042611 | 16788 | 35   | 1.124533584  | 0.100725  | 0.257657658 | 0.162211 | 0.818171759 | 0.968924   | 0.787387387 | -1        |
| molecular_function | phosphatidylinositol phosphate binding                                                    | GO:1901981 | 16804 | 57   | 1.097333645  | 0.101159  | 0.257657658 | 0.231628 | 1.103262062 | 0.0880866  | 0.218018018 | 0.156164  |
| biological_process | cellular response to stress                                                               | GO:0033554 | 15524 | 1013 | 1.022403323  | 0.101236  | 0.183783784 | 0.179977 | 1.0336706   | 0.0277076  | 0.127927928 | 0.14057   |
| biological_process | regulation of tyrosine phosphorylation of Stat3 protein                                   | GO:0042516 | 16517 | 20   | 1.16437077   | 0.101338  | 0.093693694 | 0.179907 | 1.271929477 | 0.0175311  | 0.003603604 | 0.114763  |
| biological_process | response to testosterone stimulus                                                         | GO:0033574 | 16507 | 30   | 1.134139283  | 0.101385  | 0.185585586 | 0.179822 | 0.974445926 | 0.595883   | 0.616216216 | -1        |
| molecular_function | phospholipase activity                                                                    | GO:0004620 | 16795 | 66   | 1.090275406  | 0.101545  | 0.207207207 | 0.236809 | 0.93589375  | 0.816969   | 0.810810811 | -1        |
| cellular_component | plasma lipoprotein particle                                                               | GO:0034358 | 16797 | 26   | 1.143893039  | 0.101718  | 0.167567568 | 0.161565 | 1.122394436 | 0.13967    | 0.223423423 | 0.237985  |
| molecular_function | steroid hormone receptor binding                                                          | GO:0035258 | 16813 | 48   | 1.105694477  | 0.102014  | 0.311711712 | 0.239048 | 1.390274385 | 1.376-06   | 0.009009009 | 0         |
| biological_process | positive regulation of programmed cell death                                              | GO:0043068 | 16146 | 391  | 1.036645699  | 0.102026  | 0.081081081 | 0.181729 | 1.010139191 | 0.362668   | 0.390990991 | -1        |
| biological_process | regulation of lyase activity                                                              | GO:0051339 | 16502 | 35   | 1.123708437  | 0.102228  | 0.133333333 | 0.182142 | 1.032479277 | 0.369521   | 0.390990991 | -1        |
| molecular_function | peptide receptor activity                                                                 | GO:0001653 | 16770 | 91   | 1.076562723  | 0.102316  | 0.248648649 | 0.2383   | 0.997554147 | 0.516166   | 0.497297297 | -1        |
| biological_process | positive regulation of apoptotic process                                                  | GO:0043065 | 16150 | 387  | 1.036688816  | 0.102943  | 0.082882883 | 0.183161 | 1.008064642 | 0.390508   | 0.418018018 | -1        |
| biological_process | carbohydrate catabolic process                                                            | GO:0016052 | 16430 | 107  | 1.070217372  | 0.103456  | 0.196396396 | 0.183666 | 0.953304702 | 0.799385   | 0.785585586 | -1        |
| biological_process | negative regulation of transforming growth factor beta receptor signaling pathway         | GO:0030512 | 16500 | 37   | 1.119613584  | 0.103546  | 0.194594595 | 0.183591 | 1.22849995  | 0.00797393 | 0.034234234 | 0.0773592 |
| biological_process | regulation of DNA replication                                                             | GO:0006275 | 16455 | 82   | 1.080215006  | 0.103614  | 0.154954955 | 0.18351  | 1.097611805 | 0.0624203  | 0.061261261 | 0.210091  |
| molecular_function | galactosyltransferase activity                                                            | GO:0008378 | 16830 | 31   | 1.130490736  | 0.103911  | 0.118918919 | 0.238222 | 1.086777223 | 0.201122   | 0.185585586 | 0.377551  |
| biological_process | negative regulation of myeloid leukocyte differentiation                                  | GO:0002762 | 16509 | 28   | 1.13718135   | 0.104135  | 0.086486486 | 0.184017 | 0.930483534 | 0.738177   | 0.789189189 | -1        |
| biological_process | ion transmembrane transport                                                               | GO:0034220 | 16247 | 290  | 1.042242643  | 0.104392  | 0.282882883 | 0.185792 | 1.047321871 | 0.0795555  | 0.279279279 | 0.236846  |
| biological_process | actin filament polymerization                                                             | GO:0030041 | 16450 | 87   | 1.077526182  | 0.104603  | 0.135135135 | 0.185754 | 1.087025757 | 0.0793245  | 0.07027027  | 0.236893  |
| molecular_function | receptor regulator activity                                                               | GO:0030545 | 16836 | 25   | 1.144619402  | 0.105034  | 0.120720721 | 0.240768 | 1.128853765 | 0.132057   | 0.099099099 | 0.259504  |
| biological_process | smooth muscle cell migration                                                              | GO:0014909 | 16506 | 31   | 1.129769405  | 0.105174  | 0.136936937 | 0.186723 | 1.033771209 | 0.372234   | 0.367567568 | -1        |
| molecular_function | phosphatase activity                                                                      | GO:0016791 | 16617 | 244  | 1.045916309  | 0.105389  | 0.286486486 | 0.240049 | 1.098148444 | 0.00373705 | 0.036036036 | 0         |
| biological_process | protein stabilization                                                                     | GO:0050821 | 16478 | 59   | 1.093864501  | 0.105468  | 0.203603604 | 0.187157 | 1.212838968 | 0.00227897 | 0.014414414 | 0.0510516 |
| biological_process | mitochondrion localization                                                                | GO:0051646 | 16517 | 20   | 1.161244626  | 0.105698  | 0.214414414 | 0.188465 | 1.19906069  | 0.0614344  | 0.082882883 | 0.207557  |
| molecular_function | protein deacetylase activity                                                              | GO:0033558 | 16840 | 21   | 1.157108015  | 0.106054  | 0.081081081 | 0.239493 | 0.877679875 | 0.834362   | 0.809009009 | -1        |
| biological_process | microtubule bundle formation                                                              | GO:0001578 | 16504 | 33   | 1.125228646  | 0.106155  | 0.126126126 | 0.188947 | 1.084440903 | 0.200178   | 0.209009009 | 0.395105  |
| biological_process | cytoskeleton-dependent intracellular transport                                            | GO:0030705 | 16478 | 59   | 1.093579589  | 0.106162  | 0.124324324 | 0.188846 | 1.048444557 | 0.259261   | 0.210810811 | 0.470986  |
| biological_process | negative regulation of epithelial cell proliferation                                      | GO:0050680 | 16456 | 81   | 1.079752573  | 0.106337  | 0.25045045  | 0.190129 | 1.113779819 | 0.0377022  | 0.165765766 | 0.161367  |
| biological_process | receptor recycling                                                                        | GO:0001881 | 16513 | 24   | 1.146489669  | 0.106769  | 0.097297297 | 0.190159 | 1.26187079  | 0.0130853  | 0.009009009 | 0.0988305 |
| cellular_component | basal plasma membrane                                                                     | GO:0009925 | 16798 | 25   | 1.143486111  | 0.10683   | 0.140540541 | 0.167998 | 1.225711547 | 0.0252205  | 0.106306306 | 0.0154721 |
| biological_process | oocyte differentiation                                                                    | GO:0009994 | 16505 | 32   | 1.126749712  | 0.10692   | 0.257657658 | 0.190102 | 1.102370171 | 0.157697   | 0.165765766 | 0.34857   |
| molecular_function | carboxypeptidase activity                                                                 | GO:0004180 | 16827 | 34   | 1.122664278  | 0.107467  | 0.142342342 | 0.239323 | 0.990075777 | 0.53997    | 0.567567568 | -1        |
| biological_process | protein heterooligomerization                                                             | GO:0051291 | 16464 | 73   | 1.083613441  | 0.107473  | 0.142342342 | 0.190612 | 1.026244336 | 0.348568   | 0.396369636 | -1        |
| molecular_function | primary active transmembrane transporter activity                                         | GO:0015399 | 16749 | 112  | 1.06737322   | 0.107638  | 0.252252252 | 0.237633 | 1.002798565 | 0.479484   | 0.497297297 | -1        |
| molecular_function | P-P-bond-hydrolysis-driven transmembrane transporter activity                             | GO:0015405 | 16749 | 112  | 1.06737322   | 0.107638  | 0.252252252 | 0.237633 | 1.002798565 | 0.479484   | 0.497297297 | -1        |
| biological_process | brain morphogenesis                                                                       | GO:0048854 | 16510 | 27   | 1.137281328  | 0.108132  | 0.084684685 | 0.191155 | 1.004513703 | 0.483804   | 0.457657658 | -1        |
| biological_process | glycosyl compound metabolic process                                                       | GO:1901657 | 15865 | 672  | 1.02695648   | 0.108312  | 0.272072072 | 0.191549 | 1.030604296 | 0.0803359  | 0.190990991 | 0.237261  |
| biological_process | determination of bilateral symmetry                                                       | GO:0009855 | 16461 | 76   | 1.081608308  | 0.108402  | 0.243243243 | 0.191473 | 1.201226364 | 0.00116156 | 0.030630631 | 0.0417023 |
| biological_process | monovalent inorganic cation transport                                                     | GO:0015672 | 16253 | 284  | 1.041910353  | 0.108614  | 0.255855856 | 0.191876 | 1.03241022  | 0.169988   | 0.309909991 | 0.362494  |
| biological_process | response to nutrient                                                                      | GO:0007584 | 16376 | 161  | 0.1055851539 | 0.108693  | 0.192792793 | 0.191796 | 0.996503738 | 0.530833   | 0.493693694 | -1        |
| biological_process | response to vitamin                                                                       | GO:0033273 | 16455 | 82   | 1.078403945  | 0.108833  | 0.187387387 | 0.192176 | 0.928987029 | 0.86793    | 0.81981982  | -1        |
| cellular_component | cytoplasmic microtubule                                                                   | GO:0005881 | 16794 | 29   | 1.131918066  | 0.109064  | 0.232432432 | 0.167849 | 1.248750404 | 0.0101101  | 0.028828829 | 0         |
| biological_process | regulation of RNA metabolic process                                                       | GO:0051252 | 13873 | 2664 | 1.012595339  | 0.109557  | 0.414414414 | 0.194497 | 1.058544815 | 5.51E-09   | 0.151351351 | 0         |
| biological_process | cellular response to ionizing radiation                                                   | GO:0071479 | 16503 | 34   | 1.121403272  | 0.109844  | 0.036036036 | 0.19492  | 0.977548713 | 0.589803   | 0.574774775 | -1        |
| cellular_component | clathrin adaptor complex                                                                  | GO:0030131 | 16794 | 29   | 1.131434356  | 0.10991   | 0.214414414 | 0.167122 | 1.166732881 | 0.0597894  | 0.135135135 | 0.0641349 |
| molecular_function | repressing transcription factor binding                                                   | GO:0070491 | 16821 | 40   | 1.111814257  | 0.110037  | 0.156756757 | 0.240786 | 1.203221029 | 0.0129116  | 0.037837838 | 0.0123    |
| biological_process | triglyceride biosynthesis                                                                 | GO:0019432 | 16514 | 23   | 1.147300935  | 0.110399  | 0.05045045  | 0.195427 | 0.931738694 | 0.01648    | 0.848648649 | -1        |
| biological_process | hair follicle morphogenesis                                                               | GO:0031069 | 16514 | 23   | 1.146822457  | 0.111151  | 0.306306306 | 0.196434 | 1.256551666 | 0.01648    | 0.059459459 | 0.111864  |
| biological_process | positive regulation of NF-kappaB transcription factor activity                            | GO:0051092 | 16459 | 78   | 1.079340673  | 0.111893  | 0.16036036  | 0.198744 | 1.099759915 | 0.063055   | 0.113513514 | 0.211001  |
| molecular_function | myosin binding                                                                            | GO:0017022 | 16832 | 29   | 1.130258925  | 0.111987  | 0.077477477 | 0.246476 | 1.180815401 | 0.0457047  | 0.079279279 | 0.0810252 |
| biological_process | ovarian follicle development                                                              | GO:0001541 | 16482 | 55   | 1.094400002  | 0.112262  | 0.118918919 | 0.200057 | 1.043152567 | 0.289383   | 0.198198198 | -1        |
| cellular_component | nucleosome                                                                                | GO:0000786 | 16746 | 77   | 1.079610105  | 0.11261   | 0.452252252 | 0.172488 | 0.801178092 | 0.998773   | 0.762162162 | -1        |
| biological_process | cellular response to interleukin-1                                                        | GO:0071347 | 16495 | 42   | 1.107602907  | 0.113263  | 0.205405405 | 0.202868 | 1.17914689  | 0.0220322  | 0.063063063 | 0.127674  |
| biological_process | regulation of response to biotic stimulus                                                 | GO:0002831 | 16487 | 50   | 1.098588716  | 0.113328  | 0.126126126 | 0.202764 | 0.954440216 | 0.711887   | 0.679279279 | -1        |
| biological_process | nucleotide metabolic process                                                              | GO:0009117 | 15664 | 873  | 1.022996428  | 0.113321  | 0.284684685 | 0.203098 | 1.022892533 | 0.114374   | 0.209009009 | 0.283009  |
| biological_process | actin polymerization or depolymerization                                                  | GO:0008154 | 16431 | 106  | 0.1067511871 | 0.113572  | 0.181981982 | 0.2035   | 1.104014546 | 0.0313863  | 0.016216216 | 0.146675  |
| biological_process | phospholipid biosynthetic process                                                         | GO:0008654 | 16407 | 130  | 1.060758698  | 0.114195  | 0.14954955  | 0.204024 | 0.99878467  | 0.509657   | 0.473873874 | -1        |
| biological_process | glandular epithelial cell differentiation                                                 | GO:0002067 | 16512 | 25   | 1.138956488  | 0.114238  | 0.14954955  | 0.204357 | 1.241368243 | 0.0182238  | 0.084684685 | 0.115695  |
| cellular_component | heterotrimeric G-protein complex                                                          | GO:0005834 | 16788 | 35   | 1.11715976   | 0.114722  | 0.061261261 | 0.172285 | 0.930504542 | 0.762047   | 0.81981982  | -1        |
| molecular_function | heparin binding                                                                           | GO:0008201 | 16768 | 93   | 1.071675496  | 0.114964  | 0.201801802 | 0.249884 | 0.986391103 | 0.590161   | 0.540540541 | -1        |
| biological_process | cellular response to decreased oxygen levels                                              | GO:0036294 | 16477 | 60   | 1.089300984  | 0.115021  | 0.102702703 | 0.20525  | 0.976852512 | 0.62217    |             |           |

|                    |                                                                                                        |            |       |     |             |          |             |          |             |             |             |           |
|--------------------|--------------------------------------------------------------------------------------------------------|------------|-------|-----|-------------|----------|-------------|----------|-------------|-------------|-------------|-----------|
| biological_process | release of sequestered calcium ion into cytosol                                                        | GO:0051209 | 16487 | 50  | 1.097074622 | 0.116887 | 0.212612613 | 0.207648 | 1.119916638 | 0.0706615   | 0.198198198 | 0.220608  |
| biological_process | regulation of sequestering of calcium ion                                                              | GO:0051282 | 16487 | 50  | 1.097074622 | 0.116887 | 0.212612613 | 0.207648 | 1.119916638 | 0.0706615   | 0.198198198 | 0.220608  |
| biological_process | negative regulation of sequestering of calcium ion                                                     | GO:0051283 | 16487 | 50  | 1.097074622 | 0.116887 | 0.212612613 | 0.207648 | 1.119916638 | 0.0706615   | 0.198198198 | 0.220608  |
| biological_process | apical junction assembly                                                                               | GO:0043297 | 16511 | 26  | 1.134691239 | 0.116929 | 0.12972973  | 0.207551 | 1.101620439 | 0.184548    | 0.203603604 | 0.3794    |
| molecular_function | histone-lysine N-methyltransferase activity                                                            | GO:0018024 | 16822 | 39  | 1.10980914  | 0.117189 | 0.264864865 | 0.248311 | 1.267155907 | 0.001907005 | 0.010810811 | 0         |
| biological_process | hepaticobiliary system development                                                                     | GO:0061008 | 16439 | 98  | 1.068733318 | 0.118602 | 0.18018018  | 0.209269 | 1.100483431 | 0.0419906   | 0.138738739 | 0.170294  |
| biological_process | regulation of glucose metabolic process                                                                | GO:0010906 | 16468 | 69  | 1.081942238 | 0.118725 | 0.176576577 | 0.209622 | 1.144915555 | 0.018339    | 0.032432432 | 0.115622  |
| biological_process | regulation of defense response                                                                         | GO:0031347 | 16282 | 255 | 1.042384754 | 0.118726 | 0.136936937 | 0.209509 | 0.956293968 | 0.888456    | 0.814414414 | -1        |
| biological_process | viral reproduction                                                                                     | GO:0016032 | 16384 | 153 | 1.05478958  | 0.11915  | 0.196396396 | 0.211538 | 0.995192036 | 0.541272    | 0.526126126 | -1        |
| biological_process | multi-organism cellular process                                                                        | GO:0044764 | 16384 | 153 | 1.05478958  | 0.11915  | 0.196396396 | 0.211538 | 0.995192036 | 0.541272    | 0.526126126 | -1        |
| biological_process | glycosaminoglycan biosynthetic process                                                                 | GO:0006024 | 16495 | 42  | 1.10479551  | 0.119438 | 0.162162162 | 0.211521 | 1.131524805 | 0.0696735   | 0.14954955  | 0.221414  |
| biological_process | positive regulation of apoptotic signaling pathway                                                     | GO:2001235 | 16506 | 31  | 1.122017925 | 0.119441 | 0.108108108 | 0.21141  | 1.075860145 | 0.232016    | 0.126126126 | 0.43109   |
| biological_process | axon cargo transport                                                                                   | GO:0008088 | 16504 | 33  | 1.117998258 | 0.119953 | 0.14954955  | 0.211468 | 1.059088737 | 0.278106    | 0.273873874 | 0.496165  |
| biological_process | glycerophospholipid biosynthetic process                                                               | GO:0046474 | 16437 | 100 | 1.067595749 | 0.120135 | 0.086486486 | 0.211417 | 0.970040703 | 0.698666    | 0.679279279 | -1        |
| biological_process | positive regulation of protein tyrosine kinase activity                                                | GO:0061098 | 16511 | 26  | 1.132802808 | 0.12024  | 0.135135135 | 0.211339 | 1.202604987 | 0.0366655   | 0.16036036  | 0.159992  |
| biological_process | regulation of cardiac muscle tissue growth                                                             | GO:0055021 | 16510 | 27  | 1.13019997  | 0.12045  | 0.156756757 | 0.211717 | 1.117228678 | 0.145507    | 0.153151315 | 0.336546  |
| biological_process | regulation of blood coagulation                                                                        | GO:0030193 | 16492 | 45  | 1.100789715 | 0.120472 | 0.131531532 | 0.211499 | 1.085261788 | 0.160605    | 0.158558559 | 0.350797  |
| biological_process | regulation of hemostasis                                                                               | GO:1900046 | 16492 | 45  | 1.100789715 | 0.120472 | 0.131531532 | 0.211499 | 1.085261788 | 0.160605    | 0.158558559 | 0.350797  |
| biological_process | smooth muscle tissue development                                                                       | GO:0048745 | 16517 | 20  | 1.15182916  | 0.120649 | 0.187387387 | 0.212703 | 1.228647195 | 0.0381837   | 0.135151315 | 0.162469  |
| biological_process | leukocyte mediated cytotoxicity                                                                        | GO:0001909 | 16491 | 46  | 1.099555662 | 0.120775 | 0.171171171 | 0.212633 | 0.998935939 | 0.505015    | 0.531531532 | -1        |
| biological_process | positive regulation of actin filament polymerization                                                   | GO:0030838 | 16501 | 36  | 1.112223354 | 0.121502 | 0.162162162 | 0.214018 | 1.081418774 | 0.198491    | 0.118918919 | 0.393739  |
| biological_process | exocytosis                                                                                             | GO:0006887 | 16358 | 179 | 1.050092287 | 0.121579 | 0.356756757 | 0.214764 | 1.086365734 | 0.0220935   | 0.268468468 | 0.127463  |
| biological_process | regulation of wound healing                                                                            | GO:0061041 | 16473 | 64  | 1.08399954  | 0.121777 | 0.093693694 | 0.214717 | 1.090705708 | 0.103967    | 0.144141414 | 0.265479  |
| biological_process | maintenance of protein location in cell                                                                | GO:0032507 | 16464 | 73  | 1.078537526 | 0.122051 | 0.196396396 | 0.214696 | 1.146689638 | 0.0147921   | 0.054054054 | 0.105258  |
| molecular_function | demethylase activity                                                                                   | GO:0032451 | 16841 | 20  | 1.150101555 | 0.122338 | 0.135135135 | 0.266283 | 1.444260206 | 0.000287289 | 0.003603604 | 0         |
| biological_process | activated T cell proliferation                                                                         | GO:0050798 | 16507 | 30  | 1.122396591 | 0.122579 | 0.190990991 | 0.216008 | 1.021888337 | 0.417695    | 0.421621622 | -1        |
| biological_process | RNA catabolic process                                                                                  | GO:0006401 | 16456 | 81  | 1.07428964  | 0.122846 | 0.144141414 | 0.216399 | 1.118075216 | 0.03251     | 0.030630631 | 0.149909  |
| molecular_function | protein tyrosine/serine/threonine phosphatase activity                                                 | GO:0008138 | 16815 | 46  | 1.098624829 | 0.122989 | 0.232432432 | 0.26831  | 0.99624122  | 0.517643    | 0.499099099 | -1        |
| biological_process | axis specification                                                                                     | GO:0009798 | 16462 | 75  | 1.077154373 | 0.123041 | 0.201801802 | 0.216765 | 1.118462205 | 0.0374593   | 0.228828829 | 0.161252  |
| molecular_function | hydrolase activity, acting on carbon-nitrogen (but not peptide) bonds                                  | GO:0016810 | 16760 | 101 | 1.06630831  | 0.123492 | 0.122522523 | 0.267629 | 0.91762543  | 0.92482     | 0.940540541 | -1        |
| biological_process | regulation of calcium-mediated signaling                                                               | GO:0050848 | 16505 | 32  | 1.118000892 | 0.123581 | 0.140540541 | 0.217249 | 0.983114123 | 0.565789    | 0.540540541 | -1        |
| molecular_function | epidermal growth factor receptor binding                                                               | GO:0005154 | 16840 | 21  | 1.145704514 | 0.123591 | 0.158558559 | 0.266731 | 1.069839319 | 0.289561    | 0.372972973 | -1        |
| biological_process | positive regulation of proteasomal ubiquitin-dependent protein catabolic process                       | GO:0032436 | 16502 | 35  | 1.112758727 | 0.12371  | 0.104504505 | 0.217063 | 1.135145339 | 0.0828305   | 0.043243243 | 0.243443  |
| biological_process | positive regulation of proteasomal protein catabolic process                                           | GO:1901800 | 16502 | 35  | 1.112758727 | 0.12371  | 0.104504505 | 0.217063 | 1.135145339 | 0.0828305   | 0.043243243 | 0.243443  |
| biological_process | negative regulation of DNA replication                                                                 | GO:0008156 | 16506 | 31  | 1.119817706 | 0.123729 | 0.187387387 | 0.216955 | 1.090126456 | 0.192168    | 0.14954955  | 0.388469  |
| biological_process | regulation of receptor-mediated endocytosis                                                            | GO:0048259 | 16496 | 41  | 1.103971164 | 0.124146 | 0.254054054 | 0.217396 | 1.158889952 | 0.0388359   | 0.034234234 | 0.162857  |
| biological_process | regulation of cellular ketone metabolic process                                                        | GO:0010565 | 16459 | 78  | 1.075261476 | 0.124256 | 0.223423423 | 0.217318 | 1.134762559 | 0.0913981   | 0.102702703 | 0.11977   |
| biological_process | response to light stimulus                                                                             | GO:0009416 | 16359 | 178 | 1.049612073 | 0.124532 | 0.29009009  | 0.218534 | 1.016362015 | 0.351915    | 0.401801802 | -1        |
| biological_process | positive regulation of leukocyte migration                                                             | GO:0002687 | 16483 | 54  | 1.090264873 | 0.124917 | 0.201801802 | 0.218551 | 1.14029572  | 0.0368395   | 0.046846847 | 0.160589  |
| molecular_function | purinergic receptor activity                                                                           | GO:0035586 | 16829 | 32  | 1.117268893 | 0.125052 | 0.198198198 | 0.266577 | 1.202860751 | 0.0233206   | 0.028828829 | 0.0503814 |
| molecular_function | pyrophosphatase activity                                                                               | GO:0016462 | 16031 | 830 | 1.02425365  | 0.125263 | 0.248648649 | 0.265746 | 1.024194216 | 0.107835    | 0.257657658 | 0.193106  |
| biological_process | respiratory system process                                                                             | GO:0003016 | 16517 | 20  | 1.148177706 | 0.12539  | 0.25045045  | 0.21942  | 1.11727302  | 0.181697    | 0.318918919 | 0.377016  |
| cellular_component | Golgi cisterna                                                                                         | GO:0031985 | 16749 | 74  | 1.076827762 | 0.12564  | 0.172972973 | 0.206893 | 1.161733862 | 0.0078644   | 0.048648649 | 0         |
| biological_process | telomere maintenance                                                                                   | GO:0000723 | 16500 | 37  | 1.108654348 | 0.125896 | 0.093693694 | 0.219478 | 1.082339761 | 0.192575    | 0.252252252 | 0.388618  |
| biological_process | myeloid leukocyte activation                                                                           | GO:0002274 | 16440 | 97  | 1.066955871 | 0.125999 | 0.16036036  | 0.219398 | 1.104990239 | 0.0362269   | 0.118918919 | 0.158097  |
| biological_process | positive regulation of osteoblast differentiation                                                      | GO:0045669 | 16484 | 53  | 1.090685565 | 0.12604  | 0.214414414 | 0.220117 | 1.077067939 | 0.165197    | 0.245045045 | 0.354967  |
| cellular_component | nuclear inner membrane                                                                                 | GO:0005637 | 16798 | 25  | 1.132073837 | 0.126177 | 0.102702703 | 0.210793 | 1.216695851 | 0.030186    | 0.03963964  | 0.0220025 |
| biological_process | positive regulation of cyclase activity                                                                | GO:0031281 | 16516 | 21  | 1.143903265 | 0.126539 | 0.169369369 | 0.220991 | 1.157787641 | 0.10507     | 0.261261261 | 0.267352  |
| biological_process | cardiac conduction                                                                                     | GO:0061337 | 16512 | 25  | 1.131777845 | 0.126712 | 0.214414414 | 0.221752 | 1.318025892 | 0.00292302  | 0.032432432 | 0.0563102 |
| molecular_function | antipporter activity                                                                                   | GO:0015297 | 16809 | 52  | 1.091213986 | 0.126928 | 0.25045045  | 0.265703 | 0.922853398 | 0.832751    | 0.733333333 | -1        |
| biological_process | multi-multicellular organism process                                                                   | GO:0044706 | 16382 | 155 | 1.052570595 | 0.127371 | 0.145945946 | 0.222721 | 1.068221797 | 0.0697024   | 0.082882883 | 0.221281  |
| biological_process | protein-DNA complex subunit organization                                                               | GO:0071824 | 16401 | 136 | 1.114253226 | 0.127782 | 0.437837838 | 0.222704 | 0.945988494 | 0.863365    | 0.681081081 | -1        |
| biological_process | blastocyst formation                                                                                   | GO:0001825 | 16515 | 22  | 1.139781038 | 0.127911 | 0.190990991 | 0.223039 | 1.093639217 | 0.223267    | 0.2         | 0.421712  |
| molecular_function | s, with incorporation or reduction of molecular oxygen, 2-oxoglutarate as one donor, and incorporation | GO:0016706 | 16815 | 46  | 1.096595567 | 0.127915 | 0.140540541 | 0.265295 | 1.130471605 | 0.0624151   | 0.014414414 | 0.10539   |
| biological_process | protein dephosphorylation                                                                              | GO:0006470 | 16385 | 152 | 1.05296127  | 0.127952 | 0.306306306 | 0.222937 | 1.083131122 | 0.0372582   | 0.097297297 | 0.161554  |
| biological_process | positive regulation of phospholipase activity                                                          | GO:0010518 | 16515 | 22  | 1.139720571 | 0.128013 | 0.255855856 | 0.222842 | 1.107645574 | 0.190767    | 0.286486486 | 0.38642   |
| biological_process | negative regulation of intracellular protein transport                                                 | GO:0090317 | 16484 | 53  | 1.08984359  | 0.128255 | 0.057657658 | 0.223215 | 1.084454041 | 0.143074    | 0.158558559 | 0.333874  |
| molecular_function | microtubule binding                                                                                    | GO:0008017 | 16759 | 102 | 1.064583768 | 0.128565 | 0.275675676 | 0.264707 | 1.099170202 | 0.0409233   | 0.236036036 | 0.0719249 |
| biological_process | protein import into nucleus, translocation                                                             | GO:0000060 | 16501 | 36  | 1.108679315 | 0.129104 | 0.135135135 | 0.226226 | 1.037046071 | 0.349981    | 0.351351351 | -1        |
| biological_process | endothelial cell development                                                                           | GO:0001885 | 16516 | 21  | 1.142238983 | 0.129304 | 0.185585586 | 0.226179 | 1.124611411 | 0.161166    | 0.102702703 | 0.351403  |
| molecular_function | beta-tubulin binding                                                                                   | GO:0048487 | 16834 | 27  | 1.125257159 | 0.129612 | 0.122522523 | 0.266918 | 1.089081119 | 0.211169    | 0.14954955  | 0.390244  |
| biological_process | midbrain development                                                                                   | GO:0030901 | 16509 | 28  | 1.12266063  | 0.130266 | 0.183783784 | 0.226398 | 1.197929093 | 0.0347169   | 0.117117117 | 0.155396  |
| biological_process | regulation of leukocyte mediated cytotoxicity                                                          | GO:0001910 | 16504 | 33  | 1.112783437 | 0.130659 | 0.118918919 | 0.226821 | 1.024831431 | 0.402349    | 0.454054054 | -1        |
| cellular_component | vesicle coat                                                                                           | GO:0030120 | 16791 | 32  | 1.114253303 | 0.131245 | 0.133333333 | 0.21205  | 1.126441998 | 0.107475    | 0.095495495 | 0.172896  |
| biological_process | auditory receptor cell differentiation                                                                 | GO:0042491 | 16509 | 28  | 1.122107789 | 0.131343 | 0.126126126 | 0.227346 | 1.004914097 | 0.482043    | 0.47027027  | -1        |
| biological_process | negative regulation of protein import into nucleus                                                     | GO:0042308 | 16495 | 42  | 1.099442741 | 0.131861 | 0.052252252 | 0.227813 | 1.071794923 | 0.209865    | 0.27027027  | 0.407736  |
| biological_process | dopamine transport                                                                                     | GO:0015872 | 16511 | 26  | 1.125779332 | 0.133132 | 0.291891892 | 0.230153 | 1.117179064 | 0.150173    | 0.187387387 | 0.341034  |
| biological_process | receptor internalization                                                                               | GO:0031623 | 16489 | 48  | 1.092349025 | 0.133548 | 0.29009009  | 0.230181 | 1.119858993 | 0.0748794   | 0.142342342 | 0.228751  |
| molecular_function | receptor tyrosine kinase binding                                                                       | GO:0030971 | 16829 | 32  | 1.112887677 | 0.134119 | 0.095495495 | 0.276079 | 1.040943318 | 0.344015    | 0.378378378 | -1        |
| biological_process | negative regulation of nucleocytoplasmic transport                                                     | GO:0046823 | 16488 | 49  | 1.09104194  | 0.134485 | 0.057657658 | 0.232395 | 1.101341075 | 0.109255    | 0.153151315 | 0.274706  |
| biological_process | diencephalon development                                                                               | GO:0021536 | 16473 | 64  | 1.079507975 | 0.134839 | 0.153151315 | 0.232801 | 1.077822457 | 0.139982    | 0.205405405 | 0.327822  |
| molecular_function | purinergic nucleotide receptor activity                                                                | GO:0001614 | 16835 | 26  | 1.124495487 | 0.135586 | 0.21981982  | 0.274965 | 1.182605248 | 0.0532646   | 0.057657658 | 0.0970069 |
| molecular_function | nucleotide receptor activity                                                                           | GO:0016502 | 16835 | 26  | 1.124495487 | 0.135586 | 0.21981982  | 0.274965 | 1.182605248 | 0.0532646   | 0.057657658 | 0.0970069 |

|                    |                                                                                    |            |       |      |             |          |             |          |             |            |             |            |
|--------------------|------------------------------------------------------------------------------------|------------|-------|------|-------------|----------|-------------|----------|-------------|------------|-------------|------------|
| biological_process | DNA methylation or demethylation                                                   | GO:0044728 | 16491 | 46   | 1.092562522 | 0.138109 | 0.241441441 | 0.23512  | 1.327361157 | 5.88E-05   | 0.003603604 | 0.00307858 |
| biological_process | cellular component disassembly                                                     | GO:0022411 | 16407 | 130  | 1.054851537 | 0.138407 | 0.082882883 | 0.235899 | 1.080052323 | 0.0562526  | 0.100900901 | 0.19723    |
| biological_process | pigmentation                                                                       | GO:0043473 | 16474 | 63   | 1.078869562 | 0.138669 | 0.117117117 | 0.236663 | 1.078163154 | 0.140832   | 0.174777475 | 0.32934    |
| biological_process | blood vessel remodeling                                                            | GO:0001974 | 16500 | 37   | 1.102967181 | 0.138735 | 0.174774775 | 0.236565 | 1.072642161 | 0.221791   | 0.347747748 | 0.419922   |
| biological_process | mammary gland epithelium development                                               | GO:0061180 | 16469 | 68   | 1.075860948 | 0.138803 | 0.169369369 | 0.236467 | 1.145748355 | 0.0184897  | 0.120720721 | 0.115341   |
| molecular_function | phosphatidylinositol-4,5-bisphosphate binding                                      | GO:0005546 | 16835 | 26   | 1.122771081 | 0.138933 | 0.214414414 | 0.283866 | 0.949176269 | 0.673374   | 0.594594595 | -1         |
| biological_process | TOR signaling cascade                                                              | GO:0031929 | 16494 | 43   | 1.095217751 | 0.139437 | 0.097297297 | 0.237365 | 1.043123318 | 0.311931   | 0.311711712 | -1         |
| molecular_function | lysine N-methyltransferase activity                                                | GO:0016278 | 16817 | 44   | 1.094058345 | 0.139611 | 0.227027027 | 0.284743 | 1.184722187 | 0.0167887  | 0.025225225 | 0.0236155  |
| molecular_function | protein-lysine N-methyltransferase activity                                        | GO:0016279 | 16817 | 44   | 1.094058345 | 0.139611 | 0.227027027 | 0.284743 | 1.184722187 | 0.0167887  | 0.025225225 | 0.0236155  |
| cellular_component | protein-lipid complex                                                              | GO:0032994 | 16796 | 27   | 1.119935087 | 0.140007 | 1.190990991 | 0.215248 | 1.094926708 | 0.196268   | 0.273873874 | 0.328045   |
| molecular_function | G-protein coupled amine receptor activity                                          | GO:0008227 | 16827 | 34   | 1.106529834 | 0.140742 | 0.254054054 | 0.284404 | 1.063994206 | 0.25883    | 0.358558559 | 0.451875   |
| molecular_function | hormone activity                                                                   | GO:0005179 | 16795 | 66   | 1.076284821 | 0.141067 | 0.261261261 | 0.283622 | 0.980523446 | 0.608203   | 0.589189189 | -1         |
| biological_process | posttranscriptional gene silencing                                                 | GO:0016441 | 16510 | 27   | 1.119356221 | 0.141173 | 0.120720721 | 0.238542 | 1.187271864 | 0.045819   | 0.048648649 | 0.178562   |
| biological_process | posttranscriptional gene silencing by RNA                                          | GO:0035194 | 16510 | 27   | 1.119356221 | 0.141173 | 0.120720721 | 0.238542 | 1.187271864 | 0.045819   | 0.048648649 | 0.178562   |
| biological_process | response to endoplasmic reticulum stress                                           | GO:0034976 | 16478 | 59   | 1.080522815 | 0.141597 | 1.185585586 | 0.239754 | 1.098388253 | 0.09488    | 0.151351351 | 0.255992   |
| biological_process | regulation of cell fate commitment                                                 | GO:0010453 | 16515 | 22   | 1.13200828  | 0.141605 | 0.054054054 | 0.239634 | 1.048118557 | 0.347847   | 0.317117117 | -1         |
| biological_process | aminoglycan catabolic process                                                      | GO:0006026 | 16516 | 21   | 1.134954148 | 0.141899 | 0.221621622 | 0.239618 | 0.983780879 | 0.551261   | 0.536936937 | -1         |
| biological_process | microtubule-based transport                                                        | GO:0010970 | 16479 | 58   | 1.081039524 | 0.142122 | 1.145945946 | 0.239968 | 1.037544982 | 0.309919   | 0.259459459 | -1         |
| biological_process | protein processing                                                                 | GO:0016485 | 16426 | 111  | 1.05839047  | 0.142517 | 0.079279279 | 0.240382 | 1.004021372 | 0.470679   | 0.464864865 | -1         |
| molecular_function | cyclin-dependent protein serine/threonine kinase activity                          | GO:0004693 | 16830 | 31   | 1.110636957 | 0.142775 | 1.118918919 | 0.282648 | 1.10036763  | 0.166321   | 0.209009009 | 0.319912   |
| molecular_function | cyclin-dependent protein kinase activity                                           | GO:0097472 | 16830 | 31   | 1.110636957 | 0.142775 | 1.118918919 | 0.282648 | 1.10036763  | 0.166321   | 0.209009009 | 0.319912   |
| biological_process | T-helper 1 type immune response                                                    | GO:0042088 | 16508 | 29   | 1.13852256  | 0.143924 | 1.158558559 | 0.243513 | 1.071325187 | 0.25276    | 0.264864865 | 0.46271    |
| biological_process | regulation of cell projection assembly                                             | GO:0060491 | 16482 | 55   | 1.082181269 | 0.145172 | 1.163963964 | 0.245409 | 1.12161675  | 0.0588166  | 0.162162162 | 0.202583   |
| biological_process | tyrosine phosphorylation of STAT protein                                           | GO:0007260 | 16494 | 43   | 1.092917192 | 0.145327 | 1.102702703 | 0.245341 | 1.202975577 | 0.0104893  | 0.03963964  | 0.0849317  |
| biological_process | negative regulation of ossification                                                | GO:0030279 | 16512 | 25   | 1.121899956 | 0.145379 | 0.243243243 | 0.245234 | 1.27690833  | 0.00819872 | 0.095495495 | 0.0776916  |
| biological_process | lipid transport                                                                    | GO:0006869 | 16357 | 180  | 1.04519232  | 0.145494 | 0.261261261 | 0.245151 | 1.115166081 | 0.00356275 | 0.014414414 | 0.0593107  |
| biological_process | early endosome to late endosome transport                                          | GO:0045022 | 16517 | 20   | 1.136144772 | 0.145669 | 0.21981982  | 0.245479 | 1.257586703 | 0.0229414  | 0.021621622 | 0.128615   |
| molecular_function | cysteine type peptidase activity                                                   | GO:0008234 | 16729 | 132  | 1.052699408 | 0.146215 | 0.272072072 | 0.290757 | 1.018715855 | 0.354211   | 0.403603604 | -1         |
| biological_process | regulation of interferon-gamma production                                          | GO:0032649 | 16481 | 56   | 1.080964312 | 0.14659  | 0.254054054 | 0.246085 | 0.939147592 | 0.785281   | 0.769369369 | -1         |
| biological_process | termination of signal transduction                                                 | GO:0023021 | 16495 | 42   | 1.09344499  | 0.146807 | 0.228828829 | 0.24604  | 1.151170823 | 0.0446559  | 0.066666667 | 0.176863   |
| biological_process | regulation of epithelial cell differentiation                                      | GO:0030856 | 16465 | 72   | 1.071272075 | 0.14692  | 0.264864865 | 0.245956 | 1.084393415 | 0.106933   | 0.259459459 | 0.270834   |
| biological_process | liver development                                                                  | GO:0001889 | 16441 | 96   | 1.06152597  | 0.147519 | 0.21981982  | 0.246055 | 0.093150213 | 0.0564382  | 0.156756757 | 0.196894   |
| biological_process | positive regulation of B cell proliferation                                        | GO:0030890 | 16507 | 30   | 1.110210474 | 0.147671 | 0.165765766 | 0.246372 | 1.099717434 | 0.171861   | 0.187387387 | 0.364982   |
| biological_process | regulation of anion transport                                                      | GO:0044070 | 16485 | 52   | 1.083510571 | 0.148089 | 0.243243243 | 0.24679  | 1.049949058 | 0.266044   | 0.259459459 | 0.480602   |
| cellular_component | transport vesicle membrane                                                         | GO:0030658 | 16784 | 39   | 1.096300746 | 0.148504 | 0.216216216 | 0.23798  | 1.190753776 | 0.019426   | 0.01981982  | 0.00796803 |
| biological_process | regulation of T cell differentiation in thymus                                     | GO:0033081 | 16517 | 20   | 1.134203782 | 0.149136 | 1.127972973 | 0.249755 | 1.156159351 | 0.113078   | 0.127927928 | 0.280084   |
| biological_process | heparan sulfate proteoglycan metabolic process                                     | GO:0030201 | 16516 | 21   | 1.130393209 | 0.150194 | 0.210810811 | 0.252328 | 1.146506225 | 0.122297   | 0.140540541 | 0.297339   |
| biological_process | muscle cell apoptotic process                                                      | GO:0010657 | 16512 | 25   | 1.119389366 | 0.150404 | 0.097297297 | 0.252661 | 1.11516635  | 0.159115   | 0.227027027 | 0.349926   |
| biological_process | DNA-dependent transcription, initiation                                            | GO:0006352 | 16457 | 80   | 1.066619811 | 0.150442 | 0.363963964 | 0.252546 | 0.964001259 | 0.711961   | 0.673873874 | -1         |
| biological_process | developmental induction                                                            | GO:0011128 | 16505 | 32   | 1.105238575 | 0.151013 | 0.248648649 | 0.253398 | 1.262422552 | 0.00503066 | 0.115315315 | 0.0607243  |
| molecular_function | E-box binding                                                                      | GO:0070888 | 16839 | 22   | 1.126746174 | 0.151419 | 0.171171171 | 0.302088 | 0.993752051 | 0.520266   | 0.518918919 | -1         |
| molecular_function | hydrolase activity, acting on acid anhydrides, in phosphorus-containing anhydrides | GO:0016818 | 16028 | 833  | 1.020071355 | 0.151716 | 0.272072072 | 0.303563 | 1.022548922 | 0.123808   | 0.27027027  | 0.23804    |
| cellular_component | organelle subcompartment                                                           | GO:0031984 | 16748 | 75   | 1.068375911 | 0.151988 | 0.189189189 | 0.247935 | 1.164842914 | 0.00660187 | 0.037837838 | 0          |
| biological_process | lung epithelium development                                                        | GO:0060428 | 16508 | 29   | 1.110032409 | 0.152165 | 0.135135135 | 0.254853 | 1.112730489 | 0.146312   | 0.255855856 | 0.336788   |
| biological_process | muscle cell migration                                                              | GO:0014812 | 16503 | 34   | 1.101523856 | 0.152358 | 0.181981982 | 0.254797 | 1.04509747  | 0.324234   | 0.322522523 | -1         |
| biological_process | positive regulation of calcium-mediated signaling                                  | GO:0050850 | 16515 | 22   | 1.125912106 | 0.153018 | 1.172972973 | 0.255681 | 0.907329384 | 0.774404   | 0.691891892 | -1         |
| molecular_function | excitatory extracellular ligand-gated ion channel activity                         | GO:0005231 | 16816 | 45   | 1.08761387  | 0.154019 | 0.277477477 | 0.306176 | 1.040973795 | 0.316788   | 0.381981982 | -1         |
| biological_process | positive regulation of positive chemotaxis                                         | GO:0050927 | 16517 | 20   | 1.131373926 | 0.154294 | 0.135135135 | 0.256803 | 1.188920373 | 0.0715632  | 0.068468468 | 0.223181   |
| biological_process | regulation of actin filament polymerization                                        | GO:0030833 | 16459 | 78   | 1.06357322  | 0.154472 | 1.136936937 | 0.256742 | 1.072887759 | 0.131874   | 0.140540541 | 0.312127   |
| biological_process | activation of Ras GTPase activity                                                  | GO:0032856 | 16513 | 24   | 1.119697747 | 0.154723 | 1.147747748 | 0.256708 | 1.134098972 | 0.127415   | 0.057657658 | 0.305297   |
| biological_process | actin-mediated cell contraction                                                    | GO:0070252 | 16499 | 38   | 1.094669181 | 0.155786 | 0.230630631 | 0.258126 | 1.145661961 | 0.0597324  | 0.165765766 | 0.203769   |
| molecular_function | alcohol binding                                                                    | GO:0043178 | 16802 | 59   | 1.075906999 | 0.155851 | 0.275675676 | 0.308503 | 1.171780039 | 0.0110269  | 0.045045045 | 0.012447   |
| biological_process | negative regulation of epithelial cell differentiation                             | GO:0030857 | 16517 | 20   | 1.130491107 | 0.15592  | 0.14954955  | 0.258046 | 1.135225674 | 0.147304   | 0.147747748 | 0.337298   |
| cellular_component | autophagic vacuole                                                                 | GO:0005776 | 16788 | 35   | 1.098163079 | 0.156985 | 0.218018018 | 0.276436 | 1.038839631 | 0.345171   | 0.297297297 | -1         |
| biological_process | regulation of cardiac muscle cell proliferation                                    | GO:0060043 | 16512 | 25   | 1.115920978 | 0.157535 | 0.203603604 | 0.262308 | 1.09050065  | 0.216425   | 0.266666667 | 0.416152   |
| biological_process | behavioral fear response                                                           | GO:0001662 | 16514 | 23   | 1.120811129 | 0.157639 | 0.254054054 | 0.262216 | 1.01281706  | 0.457595   | 0.479279279 | -1         |
| cellular_component | phagocytic vesicle                                                                 | GO:0045335 | 16774 | 49   | 1.082695856 | 0.157664 | 0.115315315 | 0.275216 | 0.960215272 | 0.685489   | 0.666666667 | -1         |
| biological_process | regulation of filopodium assembly                                                  | GO:0051489 | 16510 | 27   | 1.111325307 | 0.157997 | 0.218018018 | 0.262225 | 1.242475999 | 0.0144783  | 0.061261261 | 0.101731   |
| biological_process | lysosome organization                                                              | GO:0007040 | 16507 | 30   | 1.105413425 | 0.158432 | 0.097297297 | 0.263385 | 1.022642159 | 0.414902   | 0.378378378 | -1         |
| biological_process | embryonic forelimb morphogenesis                                                   | GO:0035115 | 16514 | 23   | 1.120337909 | 0.158589 | 1.145945946 | 0.263313 | 1.029395535 | 0.403497   | 0.4         | -1         |
| biological_process | lymphocyte mediated immunity                                                       | GO:0002449 | 16406 | 131  | 1.050039528 | 0.159654 | 0.257657658 | 0.264348 | 0.924886677 | 0.932548   | 0.895495495 | -1         |
| cellular_component | midbody                                                                            | GO:0030496 | 16743 | 80   | 1.064090562 | 0.159804 | 0.227027027 | 0.274929 | 1.1009531   | 0.0584737  | 0.05045045  | 0.0590438  |
| biological_process | inner ear receptor cell development                                                | GO:0060119 | 16511 | 26   | 1.112564966 | 0.159891 | 0.131531532 | 0.264681 | 1.013180468 | 0.453647   | 0.423423423 | -1         |
| molecular_function | kinesin binding                                                                    | GO:0019894 | 16841 | 20   | 1.128312904 | 0.15999  | 0.181981982 | 0.312166 | 1.139806209 | 0.139275   | 0.117117117 | 0.278859   |
| biological_process | telomere organization                                                              | GO:0032200 | 16499 | 38   | 1.092845624 | 0.160493 | 0.115315315 | 0.266643 | 1.092237771 | 0.162082   | 0.198198198 | 0.352859   |
| biological_process | regulation of tyrosine phosphorylation of STAT protein                             | GO:0042509 | 16500 | 37   | 1.129588078 | 0.161043 | 0.225225223 | 0.266729 | 1.202950189 | 0.0161526  | 0.041441441 | 0.109803   |
| cellular_component | endoplasmic reticulum                                                              | GO:0005783 | 15759 | 1064 | 1.016959849 | 0.161084 | 0.326126126 | 0.2741   | 1.021522792 | 0.104488   | 0.252252252 | 0.168931   |
| biological_process | carbohydrate homeostasis                                                           | GO:0033500 | 16429 | 108  | 1.054807694 | 0.161152 | 0.072072072 | 0.266503 | 1.074235518 | 0.0900267  | 0.072072072 | 0.251144   |
| biological_process | glucose homeostasis                                                                | GO:0042593 | 16429 | 108  | 1.054807694 | 0.161152 | 0.072072072 | 0.266503 | 1.074235518 | 0.0900267  | 0.072072072 | 0.251144   |
| biological_process | positive regulation of B cell activation                                           | GO:0050871 | 16489 | 48   | 1.082205685 | 0.161607 | 0.171711711 | 0.26655  | 1.084095279 | 0.156108   | 0.232432432 | 0.34554    |
| biological_process | regulation of organ formation                                                      | GO:0003156 | 16509 | 28   | 1.10768209  | 0.161641 | 0.2         | 0.266429 | 1.238351285 | 0.0143937  | 0.106306306 | 0.100996   |
| biological_process | DNA alkylation                                                                     | GO:0006305 | 16501 | 36   | 1.094805497 | 0.161994 | 0.27027027  | 0.267041 | 1.409045799 | 0.104E-05  | 0.001801802 | 0          |
| biological_process | DNA methylation                                                                    | GO:0006306 | 16501 | 36   | 1.094805497 | 0.161994 | 0.27027027  | 0.267041 | 1.409045799 | 0.104E-05  | 0.001801802 | 0          |
| biological_process | fear response                                                                      | GO:0042596 | 16511 | 26   | 1           |          |             |          |             |            |             |            |

|                     |                                                                                  |            |       |      |             |          |             |          |             |             |             |            |
|---------------------|----------------------------------------------------------------------------------|------------|-------|------|-------------|----------|-------------|----------|-------------|-------------|-------------|------------|
| biological_process  | cellular catabolic process                                                       | GO:0044248 | 15115 | 1422 | 1.014246822 | 0.165202 | 0.372972973 | 0.270421 | 1.03226786  | 0.0137453   | 0.111711712 | 0.0999832  |
| biological_process  | glycolipid biosynthetic process                                                  | GO:0009247 | 16494 | 43   | 1.085534593 | 0.165345 | 0.153153153 | 0.270344 | 0.925012978 | 0.803136    | 0.763963964 | -1         |
| biological_process  | female meiosis                                                                   | GO:0007143 | 16517 | 20   | 1.125321179 | 0.1657   | 0.21981982  | 0.270717 | 1.104018653 | 0.210068    | 0.162162162 | 0.407659   |
| biological_process  | cellular carbohydrate catabolic process                                          | GO:0044275 | 16497 | 40   | 1.088487703 | 0.165903 | 0.181981982 | 0.271028 | 1.103111648 | 0.129053    | 0.275675676 | 0.307552   |
| biological_process  | nucleosome organization                                                          | GO:0034728 | 16424 | 113  | 1.0525272   | 0.165922 | 0.455855856 | 0.2709   | 0.930687792 | 0.899844    | 0.668468468 | -1         |
| biological_process  | behavioral defense response                                                      | GO:0002209 | 16513 | 24   | 1.114114627 | 0.166279 | 0.257657658 | 0.270908 | 0.988494426 | 0.538935    | 0.517171717 | -1         |
| biological_process  | regulation of cysteine-type endopeptidase activity involved in apoptotic process | GO:0043281 | 16391 | 146  | 1.046021188 | 0.166681 | 0.27027027  | 0.270935 | 0.999287648 | 0.506019    | 0.545945946 | -1         |
| biological_process  | glycolysis                                                                       | GO:0006096 | 16483 | 54   | 1.07585805  | 0.166756 | 0.275675676 | 0.270829 | 0.929290511 | 0.816349    | 0.790990991 | -1         |
| biological_process  | fatty acid metabolic process                                                     | GO:0006631 | 16284 | 253  | 1.034793589 | 0.167049 | 0.279279279 | 0.271176 | 0.986267026 | 0.648534    | 0.688288288 | -1         |
| molecular_function  | protein phosphatase regulator activity                                           | GO:0019888 | 16816 | 45   | 1.082903736 | 0.167386 | 0.342342342 | 0.328896 | 1.153381779 | 0.0371674   | 0.012612613 | 0.0589093  |
| biological_process  | neuroblast proliferation                                                         | GO:0007405 | 16491 | 46   | 1.081920329 | 0.167609 | 0.263063063 | 0.271631 | 1.136732354 | 0.0538663   | 0.187387387 | 0.191689   |
| biological_process  | regulation of cysteine-type endopeptidase activity                               | GO:2000116 | 16388 | 149  | 1.045373045 | 0.167625 | 0.275675676 | 0.271502 | 0.997202351 | 0.523743    | 0.56036036  | -1         |
| biological_process  | negative regulation of coagulation                                               | GO:0050819 | 16509 | 28   | 1.104926522 | 0.16791  | 0.218018018 | 0.271481 | 1.10363512  | 0.170901    | 0.18018018  | 0.363085   |
| biological_process  | homeostasis of number of cells within a tissue                                   | GO:0048873 | 16517 | 20   | 1.124142072 | 0.167985 | 0.059459459 | 0.271376 | 1.021940742 | 0.432501    | 0.437837838 | -1         |
| biological_process  | peptide cross-linking                                                            | GO:0018149 | 16511 | 26   | 1.108820663 | 0.168072 | 0.237837838 | 0.271639 | 1.110699792 | 0.163933    | 0.284684685 | 0.354387   |
| biological_process  | negative regulation of lymphocyte differentiation                                | GO:0045620 | 16510 | 27   | 1.10675221  | 0.168143 | 0.241441441 | 0.271532 | 1.013171683 | 0.452798    | 0.410810811 | -1         |
| cellular_component  | microtubule associated complex                                                   | GO:0005875 | 16710 | 113  | 1.052010126 | 0.168314 | 0.336936937 | 0.277057 | 0.908239455 | 0.954987    | 0.967567568 | -1         |
| biological_process  | leukocyte homeostasis                                                            | GO:0001776 | 16480 | 57   | 1.073308416 | 0.168463 | 0.216216216 | 0.271525 | 1.125273972 | 0.0504      | 0.153151515 | 0.18361    |
| cellular_component  | ribonucleoprotein granule                                                        | GO:0035770 | 16749 | 74   | 1.064303819 | 0.16847  | 0.362162162 | 0.275498 | 1.174391141 | 0.004605    | 0.034234234 | 0          |
| biological_process  | regulation of mitosis                                                            | GO:0007088 | 16466 | 71   | 1.065631303 | 0.168557 | 0.169369369 | 0.271292 | 1.029017255 | 0.335653    | 0.313513514 | -1         |
| biological_process  | regulation of nuclear division                                                   | GO:0051783 | 16466 | 71   | 1.065631303 | 0.168557 | 0.169369369 | 0.271292 | 1.029017255 | 0.335653    | 0.313513514 | -1         |
| molecular_function  | ubiquitin protein ligase binding                                                 | GO:0031625 | 16719 | 142  | 1.046215093 | 0.16907  | 0.320720721 | 0.332126 | 1.151744553 | 0.000829396 | 0.007207207 | 0          |
| molecular_function  | small conjugating protein ligase binding                                         | GO:0044389 | 16719 | 142  | 1.046215093 | 0.16907  | 0.320720721 | 0.332126 | 1.151744553 | 0.000829396 | 0.007207207 | 0          |
| biological_process  | positive regulation of type I interferon production                              | GO:0032481 | 16516 | 21   | 1.120505414 | 0.169267 | 0.142342342 | 0.272531 | 1.071383171 | 0.285387    | 0.264864865 | -1         |
| biological_process  | positive regulation of lipase activity                                           | GO:0060193 | 16510 | 27   | 1.106232641 | 0.169321 | 0.261261261 | 0.272418 | 1.095357539 | 0.1952      | 0.27027027  | 0.392012   |
| biological_process  | regulation of histone acetylation                                                | GO:0035065 | 16512 | 25   | 1.110391875 | 0.169354 | 0.218018018 | 0.272295 | 0.95983871  | 0.636128    | 0.673873874 | -1         |
| biological_process  | protein ubiquitination involved in ubiquitin-dependent protein catabolic process | GO:0042787 | 16478 | 59   | 1.071612643 | 0.169936 | 0.389189189 | 0.272394 | 1.283784186 | 7.77E-05    | 0.043243243 | 0.00595647 |
| biological_process  | cellular response to oxygen levels                                               | GO:0071453 | 16470 | 67   | 1.067150567 | 0.170061 | 0.156756757 | 0.272309 | 1.003902081 | 0.47792     | 0.49009009  | -1         |
| molecular_function  | steroid hormone receptor activity                                                | GO:0003707 | 16809 | 52   | 1.076232635 | 0.170137 | 0.104504505 | 0.331711 | 1.102671253 | 0.0995079   | 0.16036036  | 0.180686   |
| molecular_function  | hydrolase activity, acting on acid anhydrides                                    | GO:0016817 | 16022 | 839  | 1.018523163 | 0.170212 | 0.281081081 | 0.330691 | 1.025034695 | 0.0987897   | 0.243243243 | 0.181134   |
| biological_process  | negative regulation of NF-kappaB transcription factor activity                   | GO:0032088 | 16487 | 50   | 1.077480894 | 0.170967 | 0.21981982  | 0.273985 | 0.957652223 | 0.698297    | 0.18018018  | -1         |
| biological_process  | bone mineralization                                                              | GO:0030282 | 16460 | 77   | 1.062213651 | 0.171631 | 0.255855856 | 0.27556  | 1.111747907 | 0.0443417   | 0.145945946 | 0.176786   |
| cell-cell_signaling | cell-cell signaling involved in cell fate commitment                             | GO:0045168 | 16504 | 33   | 1.09509409  | 0.171795 | 0.254054045 | 0.27549  | 1.267146537 | 0.00389833  | 0.113513514 | 0.0595568  |
| biological_process  | B cell proliferation                                                             | GO:0042100 | 16481 | 56   | 1.072894127 | 0.171975 | 0.254054054 | 0.275426 | 1.038754024 | 0.30744     | 0.324324324 | -1         |
| biological_process  | glycerol metabolic process                                                       | GO:0006071 | 16516 | 21   | 1.118956307 | 0.17239  | 0.120720721 | 0.275817 | 1.061034676 | 0.313938    | 0.34954955  | -1         |
| cellular_component  | microtubule cytoskeleton                                                         | GO:0015630 | 15991 | 832  | 1.018433178 | 0.172443 | 0.32972973  | 0.280702 | 1.032182716 | 0.0495565   | 0.218018018 | 0.0530254  |
| biological_process  | acute inflammatory response                                                      | GO:0002526 | 16445 | 92   | 1.056671412 | 0.172563 | 0.214414414 | 0.275751 | 0.923357442 | 0.899188    | 0.827027027 | -1         |
| biological_process  | regulation of myeloid leukocyte mediated immunity                                | GO:0002886 | 16511 | 26   | 1.106797345 | 0.172604 | 0.295495495 | 0.27563  | 1.020566745 | 0.427894    | 0.479279279 | -1         |
| biological_process  | eating behavior                                                                  | GO:0042755 | 16515 | 22   | 1.115847098 | 0.173161 | 0.190990991 | 0.27572  | 1.101714311 | 0.20416     | 0.136936937 | 0.401546   |
| biological_process  | regulation of calcium ion-dependent exocytosis                                   | GO:0017158 | 16513 | 24   | 1.110788942 | 0.173421 | 0.264864865 | 0.276048 | 1.186579293 | 0.0565603   | 0.117171717 | 0.197785   |
| molecular_function  | RNA polymerase II core promoter proximal region sequence-specific DNA binding    | GO:0000978 | 16833 | 28   | 1.102394931 | 0.173802 | 0.194594595 | 0.340318 | 1.268525136 | 0.0688581   | 0.018018018 | 0          |
| biological_process  | hexose biosynthetic process                                                      | GO:0019319 | 16496 | 41   | 1.084539134 | 0.173937 | 0.201801802 | 0.276838 | 1.097302096 | 0.139971    | 0.138738739 | 0.327451   |
| biological_process  | tyrosine phosphorylation of Stat3 protein                                        | GO:0042503 | 16513 | 24   | 1.110521879 | 0.174002 | 0.147747748 | 0.276727 | 1.260369193 | 0.0135207   | 0.014414414 | 0.0996026  |
| biological_process  | positive regulation of proteolysis                                               | GO:0045862 | 16479 | 58   | 1.070553711 | 0.175598 | 0.09090909  | 0.278315 | 1.07397948  | 0.164151    | 0.163963964 | 0.354143   |
| cellular_component  | nucleoplasm part                                                                 | GO:0044451 | 16027 | 796  | 1.018608506 | 0.175751 | 0.414414414 | 0.281168 | 1.074602068 | 9.38E-05    | 0.073873874 | 0          |
| biological_process  | cellular monovalent inorganic cation homeostasis                                 | GO:0030004 | 16506 | 31   | 1.096500849 | 0.175806 | 0.154954955 | 0.278619 | 0.896577428 | 0.840954    | 0.933333333 | -1         |
| biological_process  | transcription initiation from RNA polymerase II promoter                         | GO:0006367 | 16496 | 41   | 1.083415333 | 0.17716  | 0.187387387 | 0.27975  | 1.132877342 | 0.0700394   | 0.135135135 | 0.220989   |
| biological_process  | regulation of apoptotic signalling pathway                                       | GO:2001233 | 16463 | 74   | 1.061960747 | 0.177423 | 0.136936937 | 0.27972  | 0.982121422 | 0.605285    | 0.621621622 | -1         |
| biological_process  | determination of left/right symmetry                                             | GO:0007368 | 16470 | 67   | 1.065123569 | 0.17745  | 0.275675676 | 0.279593 | 1.205997248 | 0.00171417  | 0.021621622 | 0.0435611  |
| cellular_component  | lipid particle                                                                   | GO:0005811 | 16782 | 41   | 1.083275926 | 0.177559 | 0.167567568 | 0.28493  | 1.10043493  | 0.132372    | 0.158558559 | 0.230064   |
| biological_process  | positive regulation of lyase activity                                            | GO:0051349 | 16515 | 22   | 1.11318655  | 0.178755 | 0.218018018 | 0.279991 | 1.109404614 | 0.186901    | 0.315315315 | 0.380724   |
| biological_process  | regulation of protein acetylation                                                | GO:1901983 | 16510 | 27   | 1.102022346 | 0.179067 | 0.225225225 | 0.280199 | 1.000115289 | 0.499606    | 0.50990991  | -1         |
| biological_process  | regulation of peptidyl-lysine acetylation                                        | GO:2000756 | 16510 | 27   | 1.102022346 | 0.179067 | 0.225225225 | 0.280199 | 1.000115289 | 0.499606    | 0.50990991  | -1         |
| biological_process  | protein O-linked glycosylation                                                   | GO:0006493 | 16516 | 21   | 1.115437703 | 0.179619 | 0.154954955 | 0.281356 | 1.052373497 | 0.338731    | 0.297297297 | -1         |
| biological_process  | microtubule cytoskeleton organization                                            | GO:0000226 | 16272 | 265  | 1.032228803 | 0.179814 | 0.336936937 | 0.281652 | 1.064671062 | 0.0330156   | 0.169369369 | 0.151108   |
| biological_process  | positive regulation of DNA binding                                               | GO:0043388 | 16508 | 29   | 1.098080793 | 0.179935 | 0.201801802 | 0.281918 | 1.044319372 | 0.339544    | 0.324324324 | -1         |
| biological_process  | positive regulation of neuron apoptotic process                                  | GO:0043525 | 16491 | 46   | 1.077327466 | 0.181509 | 0.077477477 | 0.282785 | 0.916253883 | 0.837748    | 0.917171717 | -1         |
| biological_process  | inflammatory response to antigenic stimulus                                      | GO:0002437 | 16498 | 39   | 1.08398733  | 0.181541 | 0.324324324 | 0.282659 | 0.821138814 | 0.973632    | 0.936936937 | -1         |
| cellular_component  | anchored to plasma membrane                                                      | GO:0046658 | 16801 | 22   | 1.111864601 | 0.181573 | 0.167567568 | 0.294268 | 1.051344964 | 0.338198    | 0.284684685 | -1         |
| molecular_function  | anion:cation symporter activity                                                  | GO:0015296 | 16838 | 23   | 1.109013515 | 0.182428 | 0.264864865 | 0.355027 | 0.812947564 | 0.940016    | 0.841441441 | -1         |
| biological_process  | hair cell differentiation                                                        | GO:0035315 | 16505 | 32   | 1.092355324 | 0.182536 | 0.187387387 | 0.285054 | 0.973337364 | 0.603166    | 0.545945946 | -1         |
| biological_process  | cellular response to retinoic acid                                               | GO:0071300 | 16503 | 34   | 1.08957273  | 0.182588 | 0.23963964  | 0.284935 | 1.118443946 | 0.115568    | 0.122525223 | 0.283833   |
| biological_process  | regulation of tissue remodeling                                                  | GO:0034103 | 16499 | 38   | 1.084523455 | 0.183137 | 0.18018018  | 0.285728 | 1.017163212 | 0.427236    | 0.423423423 | -1         |
| biological_process  | negative regulation of response to external stimulus                             | GO:0032102 | 16421 | 116  | 1.048195515 | 0.183471 | 0.178378378 | 0.285727 | 1.043702191 | 0.20667     | 0.187387387 | 0.404116   |
| molecular_function  | acetyl/galactosaminyltransferase activity                                        | GO:0008376 | 16832 | 29   | 1.096639134 | 0.183484 | 0.223423423 | 0.35662  | 1.060892544 | 0.284865    | 0.185585586 | 0.493623   |
| cellular_component  | T-tubule                                                                         | GO:0030315 | 16794 | 29   | 1.096443273 | 0.183969 | 0.331531532 | 0.298267 | 1.321044538 | 0.00136258  | 0.102702703 | 0          |
| biological_process  | protein-DNA complex assembly                                                     | GO:0065004 | 16418 | 119  | 1.047379973 | 0.184479 | 0.464864865 | 0.287414 | 0.90662295  | 0.961704    | 0.747747748 | -1         |
| biological_process  | negative regulation of ion transport                                             | GO:0043271 | 16485 | 52   | 1.071772995 | 0.184639 | 0.288288288 | 0.28734  | 1.001812672 | 0.490976    | 0.497297297 | -1         |
| molecular_function  | histone methyltransferase activity                                               | GO:0042054 | 16813 | 48   | 1.074433337 | 0.185533 | 0.304504505 | 0.358841 | 1.215860898 | 0.00474224  | 0.021621622 | 0          |
| biological_process  | regulation of symbiosis, encompassing mutualism through parasitism               | GO:0043903 | 16516 | 21   | 1.112460423 | 0.185883 | 0.304504505 | 0.290169 | 0.926803685 | 0.719519    | 0.65045045  | -1         |
| biological_process  | negative regulation of lipid metabolic process                                   | GO:0045833 | 16494 | 43   | 1.078317926 | 0.186559 | 0.23963964  | 0.291009 | 0.936566394 | 0.764693    | 0.794594595 | -1         |
| biological_process  | positive regulation of homeostatic process                                       | GO:0032846 | 16483 | 54   | 1.0698539   | 0.186594 | 0.295495495 | 0.291229 | 1.042408599 | 0.294387    | 0.293693694 | -1         |
| biological_process  | peptide secretion                                                                | GO:0002790 | 16395 | 142  | 1.04288549  | 0.187043 | 0.291891892 | 0.291277 | 1.071790421 | 0.0683572   | 0.232423432 | 0.219655   |
| biological_process  | nuclear export                                                                   | GO:0051168 | 16458 | 79   | 1.057596986 | 0.18706  | 0.156756757 | 0.291142 | 1.063403349 | 0.163942    | 0.203603604 |            |

|                    |                                                                                                |            |       |     |             |          |             |          |             |             |             |           |
|--------------------|------------------------------------------------------------------------------------------------|------------|-------|-----|-------------|----------|-------------|----------|-------------|-------------|-------------|-----------|
| biological_process | cellular response to alcohol                                                                   | GO:0097306 | 16478 | 59  | 1.066174712 | 0.188905 | 0.23963964  | 0.2928   | 0.990779532 | 0.548927    | 0.535135135 | -1        |
| biological_process | monosaccharide biosynthetic process                                                            | GO:0046364 | 16491 | 46  | 1.074837803 | 0.189338 | 0.248648649 | 0.293532 | 1.051308251 | 0.273076    | 0.286486486 | 0.489158  |
| biological_process | regulation of B cell proliferation                                                             | GO:0030888 | 16491 | 46  | 1.074785223 | 0.189505 | 0.264864865 | 0.293805 | 0.988270085 | 0.554898    | 0.513513514 | -1        |
| biological_process | single-organism carbohydrate catabolic process                                                 | GO:0044724 | 16436 | 101 | 1.050205295 | 0.190364 | 0.293693694 | 0.294716 | 0.939422559 | 0.854926    | 0.825225225 | -1        |
| molecular_function | metallocarboxypeptidase activity                                                               | GO:0004181 | 16841 | 20  | 1.112306488 | 0.192031 | 0.205405405 | 0.364819 | 0.935429374 | 0.691639    | 0.731531532 | -1        |
| cellular_component | phagocytic vesicle membrane                                                                    | GO:0030670 | 16803 | 20  | 1.111484192 | 0.193776 | 0.25045045  | 0.309575 | 0.736953558 | 0.979267    | 0.922522523 | -1        |
| biological_process | negative regulation of protein transport                                                       | GO:0051224 | 16444 | 93  | 1.051581017 | 0.193804 | 0.174774775 | 0.298798 | 1.007226844 | 0.45185     | 0.482882883 | -1        |
| biological_process | regulation of proteasomal protein catabolic process                                            | GO:0061136 | 16472 | 65  | 1.061664773 | 0.194134 | 0.29009009  | 0.299479 | 1.084599442 | 0.118272    | 0.072072072 | 0.290513  |
| biological_process | polyol biosynthetic process                                                                    | GO:0046173 | 16508 | 29  | 1.092376044 | 0.194246 | 0.243243243 | 0.299723 | 1.038989935 | 0.357947    | 0.38018018  | -1        |
| biological_process | negative regulation of lipid biosynthetic process                                              | GO:0051055 | 16509 | 28  | 1.093990632 | 0.194305 | 0.216216216 | 0.299602 | 1.047253957 | 0.332355    | 0.306306306 | -1        |
| biological_process | regulation of ubiquitin-protein ligase activity                                                | GO:0051438 | 16509 | 28  | 1.093912889 | 0.194501 | 0.136936937 | 0.299542 | 1.213257479 | 0.025221    | 0.003603604 | 0.135957  |
| biological_process | positive regulation of neuron death                                                            | GO:1901216 | 16490 | 47  | 1.072190623 | 0.195334 | 0.073873874 | 0.30112  | 0.924926451 | 0.814017    | 0.899099099 | -1        |
| biological_process | regulation of hormone secretion                                                                | GO:0046883 | 16404 | 133 | 1.042678469 | 0.196027 | 0.228828829 | 0.302293 | 1.066328797 | 0.0917126   | 0.185585586 | 0.2522    |
| biological_process | regulation of metal ion transport                                                              | GO:0010959 | 16381 | 156 | 1.039117712 | 0.197586 | 0.394594595 | 0.304521 | 1.099514947 | 0.0152664   | 0.18018018  | 0.106357  |
| biological_process | acid secretion                                                                                 | GO:0046717 | 16502 | 35  | 1.082704898 | 0.198124 | 0.205405405 | 0.304947 | 0.941516171 | 0.725742    | 0.652252252 | -1        |
| molecular_function | bHLH transcription factor binding                                                              | GO:0043425 | 16840 | 21  | 1.06698778  | 0.19838  | 0.192792793 | 0.371855 | 1.102411875 | 0.208002    | 0.122522523 | 0.380181  |
| biological_process | nephron morphogenesis                                                                          | GO:0072028 | 16507 | 30  | 1.088869653 | 0.199382 | 0.218018018 | 0.305691 | 1.094541458 | 0.184676    | 0.286486486 | 0.379591  |
| biological_process | transcription elongation from RNA polymerase II promoter                                       | GO:0006368 | 16512 | 25  | 1.097214906 | 0.19975  | 0.190990991 | 0.305704 | 1.159582992 | 0.0833228   | 0.048648649 | 0.243378  |
| biological_process | B cell differentiation                                                                         | GO:0030183 | 16467 | 70  | 1.058017084 | 0.199756 | 0.297297297 | 0.305558 | 1.089009015 | 0.0980789   | 0.10990991  | 0.26075   |
| biological_process | regulation of B cell mediated immunity                                                         | GO:0002712 | 16507 | 30  | 1.088273045 | 0.200969 | 0.304504505 | 0.307144 | 0.90138566  | 0.825483    | 0.809009009 | -1        |
| biological_process | regulation of immunoglobulin mediated immune response                                          | GO:0002889 | 16507 | 30  | 1.088273045 | 0.200969 | 0.304504505 | 0.307144 | 0.90138566  | 0.825483    | 0.809009009 | -1        |
| biological_process | post-Golgi vesicle-mediated transport                                                          | GO:0006892 | 16500 | 37  | 1.079286995 | 0.201508 | 0.344144144 | 0.30757  | 1.085902412 | 0.182461    | 0.315315315 | 0.377254  |
| biological_process | viral infectious cycle                                                                         | GO:0019058 | 16475 | 62  | 1.061034025 | 0.202163 | 0.216216216 | 0.308717 | 1.032462391 | 0.328697    | 0.291891892 | -1        |
| biological_process | cytokinesis                                                                                    | GO:0000910 | 16464 | 73  | 1.056217747 | 0.202211 | 0.246846847 | 0.308924 | 1.044177358 | 0.256179    | 0.263063063 | 0.467078  |
| biological_process | positive regulation of transforming growth factor beta receptor signaling pathway              | GO:0030511 | 16516 | 21  | 1.104864615 | 0.202468 | 0.254054054 | 0.308889 | 1.181755609 | 0.0744332   | 0.135135135 | 0.228     |
| biological_process | regulation of positive chemotaxis                                                              | GO:0050926 | 16516 | 21  | 1.104760958 | 0.202694 | 0.2         | 0.30884  | 1.193716559 | 0.0619575   | 0.066666667 | 0.209108  |
| biological_process | phosphatidylinositol biosynthetic process                                                      | GO:0006661 | 16479 | 58  | 1.062765978 | 0.20345  | 0.225225225 | 0.309361 | 1.015555843 | 0.418589    | 0.372972973 | -1        |
| biological_process | steroid biosynthetic process                                                                   | GO:0006694 | 16420 | 117 | 1.044104948 | 0.20347  | 0.297297297 | 0.30922  | 0.976120397 | 0.673306    | 0.641441441 | -1        |
| biological_process | intracellular steroid hormone receptor signaling pathway                                       | GO:0030518 | 16469 | 68  | 1.057816882 | 0.203989 | 0.335135135 | 0.310303 | 1.181605289 | 0.00467204  | 0.081081081 | 0.0589753 |
| biological_process | inorganic anion transport                                                                      | GO:0015698 | 16459 | 78  | 1.053877863 | 0.204379 | 0.218018018 | 0.310659 | 0.859381868 | 0.984469    | 0.98018018  | -1        |
| biological_process | positive regulation of peptidyl-serine phosphorylation                                         | GO:0033138 | 16491 | 46  | 1.070218649 | 0.204402 | 0.216216216 | 0.31052  | 1.069808525 | 0.205773    | 0.185585586 | 0.403325  |
| biological_process | regulation of muscle cell apoptotic process                                                    | GO:0010660 | 16517 | 20  | 1.06401053  | 0.204785 | 0.183783784 | 0.310873 | 1.032208039 | 0.401452    | 0.448648649 | -1        |
| molecular_function | ligand-gated ion channel activity                                                              | GO:0015276 | 16746 | 115 | 1.04422153  | 0.204898 | 0.338738739 | 0.383663 | 1.065292849 | 0.111819    | 0.324324324 | 0.195892  |
| molecular_function | ligand-gated channel activity                                                                  | GO:0022834 | 16746 | 115 | 1.04422153  | 0.204898 | 0.338738739 | 0.383663 | 1.065292849 | 0.111819    | 0.324324324 | 0.195892  |
| biological_process | regulation of biomineral tissue development                                                    | GO:0070167 | 16478 | 59  | 1.061792392 | 0.205104 | 0.367567568 | 0.311198 | 1.114035883 | 0.0642732   | 0.225225225 | 0.213894  |
| biological_process | positive regulation of myeloid leukocyte differentiation                                       | GO:0002763 | 16506 | 31  | 1.085004316 | 0.205968 | 0.245045045 | 0.312761 | 1.21314365  | 0.0198231   | 0.048648649 | 0.123583  |
| biological_process | neutral lipid biosynthetic process                                                             | GO:0046460 | 16512 | 25  | 1.09464143  | 0.206048 | 0.163963964 | 0.312495 | 0.910105809 | 0.782059    | 0.85045045  | -1        |
| biological_process | acylglycerol biosynthetic process                                                              | GO:0046463 | 16512 | 25  | 1.09464143  | 0.206048 | 0.163963964 | 0.312495 | 0.910105809 | 0.782059    | 0.85045045  | -1        |
| biological_process | nitric oxide metabolic process                                                                 | GO:0046209 | 16491 | 46  | 1.069495674 | 0.206823 | 0.21981982  | 0.313022 | 1.188885512 | 0.830031    | 0.718918919 | -1        |
| biological_process | lipid storage                                                                                  | GO:0019915 | 16489 | 48  | 1.06794807  | 0.207099 | 0.268486486 | 0.312995 | 1.202278039 | 0.00753115  | 0.01981982  | 0.0765787 |
| biological_process | sexual reproduction                                                                            | GO:0019953 | 16080 | 457 | 1.021736239 | 0.207231 | 0.263063063 | 0.312904 | 1.034274211 | 0.0990673   | 0.216216216 | 0.262386  |
| molecular_function | ligase activity, forming carbon-sulfur bonds                                                   | GO:0016877 | 16835 | 26  | 1.092110404 | 0.207787 | 0.212612613 | 0.38445  | 1.024593961 | 0.413965    | 0.358558559 | -1        |
| biological_process | superoxide anion generation                                                                    | GO:0042554 | 16517 | 20  | 1.104859144 | 0.208195 | 0.234234234 | 0.313515 | 1.085836225 | 0.252943    | 0.286486486 | 0.462857  |
| biological_process | positive regulation of tumor necrosis factor production                                        | GO:0032760 | 16507 | 30  | 1.085189228 | 0.209292 | 0.297297297 | 0.314848 | 0.895097092 | 0.840418    | 0.85045045  | -1        |
| biological_process | oligosaccharide metabolic process                                                              | GO:0009311 | 16512 | 25  | 1.093311156 | 0.209349 | 0.189189189 | 0.314722 | 0.938007703 | 0.704483    | 0.751351351 | -1        |
| biological_process | negative regulation of apoptotic signaling pathway                                             | GO:2001234 | 16516 | 21  | 1.101599397 | 0.209861 | 0.210810811 | 0.31513  | 1.002617791 | 0.491725    | 0.482882883 | -1        |
| molecular_function | ligand-activated sequence-specific DNA binding RNA polymerase II transcription factor activity | GO:0004879 | 16820 | 41  | 1.072442401 | 0.210582 | 0.120720721 | 0.389    | 1.143003761 | 0.0561496   | 0.099099099 | 0.100998  |
| cellular_component | lateral plasma membrane                                                                        | GO:0016328 | 16794 | 29  | 1.085900037 | 0.211302 | 0.340540541 | 0.336407 | 1.200190849 | 0.0308185   | 0.147747748 | 0.0354348 |
| molecular_function | cysteine-type endopeptidase activity                                                           | GO:0004197 | 16809 | 52  | 1.064104766 | 0.211303 | 0.120720721 | 0.392068 | 0.966949516 | 0.66037     | 0.616216216 | -1        |
| molecular_function | regulation of lipid catabolic process                                                          | GO:0050994 | 16506 | 31  | 1.082983548 | 0.21157  | 0.279279279 | 0.318379 | 1.009334737 | 0.464121    | 0.457657658 | -1        |
| biological_process | positive regulation of tyrosine phosphorylation of STAT protein                                | GO:0042531 | 16505 | 32  | 1.081614872 | 0.211738 | 0.118918919 | 0.318302 | 1.184525934 | 0.0351691   | 0.099099099 | 0.15641   |
| biological_process | positive regulation of I-kappaB kinase/NF-kappaB cascade                                       | GO:0043123 | 16425 | 112 | 1.043489886 | 0.2119   | 0.185585586 | 0.31855  | 1.008356397 | 0.438951    | 0.472072072 | -1        |
| molecular_function | cyclase activity                                                                               | GO:0009975 | 16837 | 24  | 1.09366792  | 0.213202 | 0.30990991  | 0.395905 | 1.368793625 | 0.000869248 | 0.016216216 | 0         |
| biological_process | intrinsic apoptotic signaling pathway in response to DNA damage                                | GO:0008630 | 16497 | 40  | 1.072415573 | 0.213539 | 0.237837838 | 0.320775 | 1.165253588 | 0.0349582   | 0.048648649 | 0.156705  |
| biological_process | apoptotic signaling pathway                                                                    | GO:0097190 | 16370 | 167 | 1.035267525 | 0.213768 | 0.232432432 | 0.321376 | 1.032899535 | 0.229622    | 0.207207207 | 0.42848   |
| biological_process | regulation of epidermis development                                                            | GO:0045682 | 16502 | 35  | 1.076630556 | 0.215925 | 0.237837838 | 0.323834 | 1.175710061 | 0.0357414   | 0.077477477 | 0.157211  |
| biological_process | response to ethanol                                                                            | GO:0045471 | 16426 | 111 | 1.042831384 | 0.216465 | 0.30990991  | 0.325544 | 1.118737629 | 0.0148498   | 0.043243243 | 0.105603  |
| molecular_function | phosphoprotein binding                                                                         | GO:0051219 | 16809 | 52  | 1.062521779 | 0.217077 | 0.30990991  | 0.397394 | 1.103394318 | 0.0979354   | 0.158558559 | 0.178812  |
| cellular_component | endocytic vesicle membrane                                                                     | GO:0030666 | 16795 | 28  | 1.085231715 | 0.217163 | 0.227027027 | 0.338932 | 0.861066287 | 0.898752    | 0.848648649 | -1        |
| biological_process | stem cell division                                                                             | GO:0017145 | 16510 | 27  | 1.086793619 | 0.21718  | 0.338738739 | 0.326685 | 1.169808097 | 0.0630686   | 0.138738739 | 0.210865  |
| biological_process | regulation of antigen receptor-mediated signaling pathway                                      | GO:0050854 | 16510 | 27  | 1.086627895 | 0.217619 | 0.230630631 | 0.327054 | 1.083949431 | 0.224785    | 0.185585586 | 0.423513  |
| biological_process | proteasomal ubiquitin-dependent protein catabolic process                                      | GO:0043161 | 16377 | 160 | 1.035361393 | 0.218163 | 0.392792793 | 0.327472 | 1.008582069 | 0.425093    | 0.436036036 | -1        |
| molecular_function | drug binding                                                                                   | GO:0008144 | 16779 | 82  | 1.049180383 | 0.219688 | 0.261261261 | 0.399854 | 1.118159312 | 0.0315979   | 0.093693694 | 0.0526608 |
| biological_process | negative regulation of neuron projection development                                           | GO:0010977 | 16506 | 31  | 1.080010912 | 0.219971 | 0.273873874 | 0.32976  | 1.261833242 | 0.00574527  | 0.027027027 | 0.0647351 |
| biological_process | regulation of activated T cell proliferation                                                   | GO:0046006 | 16513 | 24  | 1.093061172 | 0.221461 | 0.277477477 | 0.331897 | 0.938357202 | 0.699867    | 0.742342342 | -1        |
| cellular_component | sarcomasm                                                                                      | GO:0016528 | 16771 | 52  | 1.061192914 | 0.221992 | 0.263063063 | 0.340682 | 1.158249826 | 0.0238721   | 0.082882883 | 0.0157747 |
| biological_process | cell aging                                                                                     | GO:0007569 | 16466 | 71  | 1.05227065  | 0.222294 | 0.221621622 | 0.333403 | 1.06215658  | 0.181659    | 0.201801802 | 0.377182  |
| cellular_component | dynein complex                                                                                 | GO:0030286 | 16785 | 38  | 1.071436744 | 0.222553 | 0.374777475 | 0.339095 | 0.870145248 | 0.917447    | 0.830630631 | -1        |
| biological_process | immunoglobulin mediated immune response                                                        | GO:0016064 | 16461 | 76  | 1.050348459 | 0.223043 | 0.281081081 | 0.334232 | 0.892352951 | 0.948374    | 0.895495495 | -1        |
| molecular_function | actinin binding                                                                                | GO:0042805 | 16839 | 22  | 1.093707906 | 0.223096 | 0.261261261 | 0.406521 | 1.233457405 | 0.0288543   | 0.005405405 | 0.0539181 |
| biological_process | regulation of cell division                                                                    | GO:0051302 | 16475 | 62  | 1.057503176 | 0.223305 | 0.205405405 | 0.334196 | 1.075766518 | 0.150281    | 0.086486486 | 0.341244  |
| biological_process | positive regulation of organic acid transport                                                  | GO:0032892 | 16515 | 22  | 1.093111505 | 0.22455  | 0.345945946 | 0.33526  | 1.202545788 | 0.0498222   | 0.126126126 | 0.18372   |
| biological_process | protein localization to endoplasmic reticulum                                                  | GO:0070972 | 16510 | 27  | 1.083900161 | 0.224918 | 0.153153153 | 0.335275 | 0.99820274  | 0.506478    | 0.491891892 | -1        |
| biological_process | peptide hormone secretion                                                                      | GO:0030072 | 16399 | 138 | 1.036965303 | 0.225027 | 0.320720721 |          |             |             |             |           |

|                    |                                                                            |            |       |      |             |          |             |            |              |             |             |            |
|--------------------|----------------------------------------------------------------------------|------------|-------|------|-------------|----------|-------------|------------|--------------|-------------|-------------|------------|
| biological_process | regulation of transmembrane transport                                      | GO:0034762 | 16438 | 99   | 1.042685688 | 0.230319 | 0.407207207 | 0.340036   | 1.152961623  | 0.00409636  | 0.072072072 | 0.0585857  |
| biological_process | negative regulation of protein polymerization                              | GO:0032272 | 16498 | 39   | 1.068104664 | 0.230409 | 0.163963964 | 0.339917   | 0.1071652061 | 0.218898    | 0.241441441 | 0.418113   |
| biological_process | Golgi to plasma membrane transport                                         | GO:0006893 | 16510 | 27   | 1.081853241 | 0.230485 | 0.290909099 | 0.340105   | 0.059234102  | 0.296841    | 0.351351351 | -1         |
| biological_process | regulation of DNA-dependent transcription in response to stress            | GO:0043620 | 16517 | 20   | 1.095033256 | 0.230701 | 0.300900901 | 0.340048   | 0.183829052  | 0.0771097   | 0.194594595 | 0.233048   |
| biological_process | regulation of ion transmembrane transport                                  | GO:0034765 | 16445 | 92   | 1.044036437 | 0.231601 | 0.412612613 | 0.340945   | 0.190793799  | 0.000739997 | 0.05045045  | 0.0330714  |
| biological_process | protein localization to cell surface                                       | GO:0034394 | 16510 | 27   | 1.08134711  | 0.231873 | 0.234234234 | 0.341226   | 0.989885167  | 0.536317    | 0.531513514 | -1         |
| molecular_function | sodium channel activity                                                    | GO:0005272 | 16831 | 30   | 1.077156424 | 0.231896 | 0.297297297 | 0.3417019  | 0.293603801  | 0.00265248  | 0.03963964  | 0          |
| biological_process | nitric oxide biosynthetic process                                          | GO:0006809 | 16494 | 43   | 1.064269895 | 0.232425 | 0.277477477 | 0.343201   | 0.929195045  | 0.78968     | 0.681081081 | -1         |
| molecular_function | catalytic activity                                                         | GO:0003824 | 11736 | 5125 | 1.004902993 | 0.233063 | 0.313513514 | 0.416597   | 1.00538669   | 0.211754    | 0.326126126 | 0.389342   |
| biological_process | positive regulation of production of molecular mediator of immune response | GO:0002702 | 16515 | 22   | 1.089532958 | 0.233361 | 0.317117117 | 0.345042   | 0.085470674  | 0.243591    | 0.30990991  | 0.449255   |
| biological_process | regulation of peptidyl-serine phosphorylation                              | GO:0033135 | 16478 | 59   | 1.054374423 | 0.23433  | 0.209090909 | 0.346585   | 0.076468451  | 0.154069    | 0.133333333 | 0.345427   |
| biological_process | regulation of protein oligomerization                                      | GO:0032459 | 16517 | 20   | 1.093074125 | 0.235345 | 0.115315315 | 0.348148   | 0.901091388  | 0.778363    | 0.823423423 | -1         |
| biological_process | positive regulation of interleukin-6 production                            | GO:0032755 | 16505 | 32   | 1.073455606 | 0.235645 | 0.201801802 | 0.349664   | 0.91166102   | 0.80688     | 0.754954955 | -1         |
| biological_process | regulation of actin polymerization or depolymerization                     | GO:0008064 | 16449 | 88   | 1.044214312 | 0.235679 | 0.243242343 | 0.349516   | 0.053550968  | 0.1915      | 0.214414414 | 0.386865   |
| biological_process | positive regulation of actin filament bundle assembly                      | GO:0032233 | 16507 | 30   | 1.0757725   | 0.235928 | 0.223423423 | 0.350084   | 0.965831393  | 0.627222    | 0.628828829 | -1         |
| biological_process | axon regeneration                                                          | GO:0031103 | 16505 | 32   | 1.073194842 | 0.236433 | 0.279279279 | 0.350472   | 0.127086059  | 0.106314    | 0.207207207 | 0.269745   |
| biological_process | positive regulation of bone mineralization                                 | GO:0030501 | 16508 | 29   | 1.07687147  | 0.2365   | 0.322522523 | 0.35034    | 0.040678841  | 0.352077    | 0.425225225 | -1         |
| biological_process | positive regulation of transporter activity                                | GO:0032411 | 16509 | 28   | 1.078165554 | 0.236695 | 0.344144144 | 0.350576   | 0.1343637297 | 0.000810248 | 0.001801802 | 0.034652   |
| biological_process | regulation of protein tyrosine kinase activity                             | GO:0061097 | 16494 | 43   | 1.063040868 | 0.236716 | 0.281081081 | 0.350422   | 0.176707585  | 0.0222353   | 0.142342342 | 0.128073   |
| biological_process | hexose catabolic process                                                   | GO:0019320 | 16466 | 71   | 1.049008839 | 0.236761 | 0.331531532 | 0.35028    | 0.910239619  | 0.905396    | 0.873873874 | -1         |
| biological_process | metanephros morphogenesis                                                  | GO:0003338 | 16510 | 27   | 1.079568932 | 0.236787 | 0.255855856 | 0.350128   | 0.145352553  | 0.9052287   | 0.190990991 | 0.255691   |
| biological_process | regulation of lipid transport                                              | GO:0032368 | 16481 | 56   | 1.05491815  | 0.237926 | 0.306306306 | 0.350824   | 0.165201327  | 0.0159808   | 0.021621622 | 0.108319   |
| molecular_function | beta-amyloid binding                                                       | GO:0001540 | 16839 | 22   | 1.087443143 | 0.238589 | 0.299090909 | 0.421165   | 0.809750251  | 0.939029    | 0.852252252 | -1         |
| biological_process | metaphase/anaphase transition of mitotic cell cycle                        | GO:0007091 | 16508 | 29   | 1.075578728 | 0.240237 | 0.313513514 | 0.353451   | 0.140449398  | 0.0949019   | 0.077477477 | 0.255695   |
| biological_process | metaphase/anaphase transition of cell cycle                                | GO:0044784 | 16508 | 29   | 1.075578728 | 0.240237 | 0.313513514 | 0.353451   | 0.140449398  | 0.0949019   | 0.077477477 | 0.255695   |
| biological_process | adrenal gland development                                                  | GO:0030325 | 16514 | 23   | 1.084436282 | 0.241139 | 0.25045045  | 0.355063   | 0.871261174  | 0.857737    | 0.809009009 | -1         |
| molecular_function | small conjugating protein binding                                          | GO:0032182 | 16791 | 70   | 1.04832573  | 0.241413 | 0.369369369 | 0.425506   | 0.081060387  | 0.119571    | 0.142342342 | 0.222235   |
| molecular_function | phospholipase A2 activity                                                  | GO:0004623 | 16840 | 21   | 1.088359418 | 0.241414 | 0.255855856 | 0.424208   | 0.765322346  | 0.968835    | 0.879279279 | -1         |
| molecular_function | exopeptidase activity                                                      | GO:0008238 | 16774 | 87   | 1.043297368 | 0.241558 | 0.198198198 | 0.424773   | 0.002770933  | 0.482109    | 0.490090909 | -1         |
| biological_process | negative regulation of behavior                                            | GO:0048521 | 16513 | 24   | 1.082581085 | 0.241588 | 0.288288288 | 0.355599   | 0.177655371  | 0.0657052   | 0.151351351 | 0.218468   |
| molecular_function | double-stranded RNA binding                                                | GO:0003725 | 16818 | 43   | 1.061647481 | 0.241629 | 0.317117117 | 0.423541   | 0.192228781  | 0.0144031   | 0.037837838 | 0.0241332  |
| biological_process | nucleosome assembly                                                        | GO:0006334 | 16441 | 96   | 1.04114733  | 0.241876 | 0.475675676 | 0.355876   | 0.879178901  | 0.980133    | 0.72972973  | -1         |
| biological_process | adenylate cyclase-inhibiting G-protein coupled receptor signaling pathway  | GO:0007193 | 16507 | 30   | 1.073571501 | 0.242413 | 0.351351351 | 0.357178   | 0.009327325  | 0.464732    | 0.473873874 | -1         |
| biological_process | calcium ion transmembrane transport                                        | GO:0070588 | 16475 | 62   | 1.051095981 | 0.242549 | 0.418018018 | 0.357078   | 0.146327611  | 0.0227831   | 0.23963964  | 0.129142   |
| biological_process | chromatin assembly                                                         | GO:0031497 | 16425 | 112  | 1.037916124 | 0.242799 | 0.468468468 | 0.357035   | 0.910926778  | 0.949332    | 0.697297297 | -1         |
| molecular_function | cation-transporting ATPase activity                                        | GO:0019829 | 16816 | 45   | 1.05935834  | 0.244908 | 0.32972973  | 0.42467    | 0.910455386  | 0.851261    | 0.781981982 | -1         |
| biological_process | Golgi organization                                                         | GO:0007030 | 16495 | 42   | 1.061417633 | 0.245017 | 0.315315315 | 0.359468   | 0.086750429  | 0.164784    | 0.273873874 | 0.35445    |
| molecular_function | kinase activator activity                                                  | GO:0019209 | 16817 | 44   | 1.059852847 | 0.245552 | 0.282882883 | 0.423859   | 0.156705973  | 0.03571     | 0.03963964  | 0.0551273  |
| molecular_function | monovalent inorganic cation transmembrane transporter activity             | GO:0015077 | 16567 | 294  | 1.022978699 | 0.245583 | 0.363963964 | 0.422602   | 0.980311385  | 0.722389    | 0.625225225 | -1         |
| biological_process | aromatic compound biosynthetic process                                     | GO:0019438 | 13501 | 3036 | 1.006492801 | 0.246516 | 0.452252252 | 0.360647   | 0.038765769  | 0.212E-05   | 0.174777477 | 0          |
| biological_process | nucleobase-containing compound biosynthetic process                        | GO:0034654 | 13568 | 2969 | 1.006570938 | 0.246946 | 0.457657658 | 0.360693   | 0.041344047  | 0.825E-06   | 0.178378378 | 0          |
| biological_process | heterocycle biosynthetic process                                           | GO:0018130 | 13499 | 3038 | 1.006459151 | 0.247504 | 0.452252252 | 0.361699   | 0.038527761  | 0.234E-05   | 0.169369369 | 0.00336779 |
| biological_process | melanocyte differentiation                                                 | GO:0030318 | 16513 | 24   | 1.080243027 | 0.247826 | 0.190990991 | 0.361691   | 0.928606898  | 0.727841    | 0.679279279 | -1         |
| biological_process | regulation of leukocyte degranulation                                      | GO:0043300 | 16515 | 22   | 1.083772101 | 0.247939 | 0.371171711 | 0.361877   | 0.005401367  | 0.482507    | 0.497297297 | -1         |
| biological_process | organic cyclic compound biosynthetic process                               | GO:1901362 | 13407 | 3130 | 1.006329359 | 0.248013 | 0.436036036 | 0.362043   | 0.03515797   | 0.62E-05    | 0.169369369 | 0.00304133 |
| biological_process | cellular response to cAMP                                                  | GO:0071320 | 16513 | 24   | 1.08013721  | 0.24811  | 0.221621622 | 0.36222    | 0.86587742   | 0.877624    | 0.884684685 | -1         |
| biological_process | regulation of cell killing                                                 | GO:0031341 | 16499 | 38   | 1.063620966 | 0.248242 | 0.387387387 | 0.362117   | 0.05578854   | 0.276234    | 0.354954955 | 0.494077   |
| biological_process | steroid hormone mediated signaling pathway                                 | GO:0043401 | 16485 | 52   | 1.054288728 | 0.248538 | 0.205405405 | 0.362394   | 0.080938398  | 0.155653    | 0.221621622 | 0.345835   |
| biological_process | fertilization                                                              | GO:0009566 | 16464 | 73   | 1.045668326 | 0.249113 | 0.205405405 | 0.362514   | 0.011604694  | 0.431696    | 0.425225225 | -1         |
| biological_process | cellular ketone metabolic process                                          | GO:0042180 | 16425 | 112  | 1.036755374 | 0.249527 | 0.302702703 | 0.362553   | 0.051066618  | 0.173812    | 0.230630631 | 0.367041   |
| biological_process | negative regulation of stress-activated MAPK cascade                       | GO:0032873 | 16514 | 23   | 1.081244676 | 0.24974  | 0.230630631 | 0.362322   | 0.1206232603 | 0.0432381   | 0.018018018 | 0.1742     |
| biological_process | negative regulation of stress-activated protein kinase signaling cascade   | GO:0070303 | 16514 | 23   | 1.081244676 | 0.24974  | 0.230630631 | 0.362322   | 0.1206232603 | 0.0432381   | 0.018018018 | 0.1742     |
| biological_process | chromatin remodeling                                                       | GO:0006338 | 16470 | 67   | 1.047272265 | 0.250945 | 0.237837838 | 0.364237   | 0.167610628  | 0.00862996  | 0.055855856 | 0.0777971  |
| molecular_function | phospholipid transporter activity                                          | GO:0005548 | 16838 | 23   | 1.080670889 | 0.251253 | 0.302702703 | 0.435779   | 0.097647586  | 0.20849     | 0.300909091 | 0.380059   |
| biological_process | negative regulation of protein complex assembly                            | GO:0031333 | 16475 | 62   | 1.049071311 | 0.251282 | 0.212612613 | 0.364238   | 0.015644761  | 0.415385    | 0.477477477 | -1         |
| biological_process | lipid homeostasis                                                          | GO:0050884 | 16473 | 64   | 1.048291884 | 0.251298 | 0.272072072 | 0.364077   | 0.132633907  | 0.0327825   | 0.059459459 | 0.151145   |
| biological_process | sensory perception of chemical stimulus                                    | GO:0007606 | 16457 | 80   | 1.043105705 | 0.251631 | 0.331531532 | 0.364959   | 0.025044211  | 0.348685    | 0.394594595 | -1         |
| molecular_function | cytokine activity                                                          | GO:0005125 | 16730 | 131  | 1.033464043 | 0.252686 | 0.394594595 | 0.435547   | 0.997192934  | 0.522274    | 0.574777477 | -1         |
| biological_process | termination of G-protein coupled receptor signaling pathway                | GO:0038032 | 16498 | 39   | 1.061372671 | 0.253154 | 0.34954955  | 0.36644    | 0.140268157  | 0.0643797   | 0.133333333 | 0.214854   |
| biological_process | meiotic cell cycle                                                         | GO:0051321 | 16504 | 33   | 1.066626957 | 0.253486 | 0.282882883 | 0.367318   | 0.029855689  | 0.383113    | 0.425225225 | -1         |
| cellular_component | endoplasmic reticulum-Golgi intermediate compartment                       | GO:0005793 | 16769 | 54   | 1.051987585 | 0.253743 | 0.268468468 | 0.409225   | 0.026162471  | 0.369371    | 0.344144144 | -1         |
| molecular_function | sulfur compound transmembrane transporter activity                         | GO:1901682 | 16839 | 22   | 1.081512645 | 0.253782 | 0.236036036 | 0.436742   | 0.931266164  | 0.711852    | 0.785585586 | -1         |
| biological_process | lactation                                                                  | GO:0007595 | 16492 | 45   | 1.056933669 | 0.253865 | 0.335135135 | 0.36734    | 0.208103866  | 0.00773349  | 0.048648649 | 0.0771091  |
| biological_process | lipid catabolic process                                                    | GO:0016042 | 16355 | 182  | 1.028111831 | 0.254456 | 0.311717172 | 0.368053   | 0.951863604  | 0.871007    | 0.798198198 | -1         |
| molecular_function | hydrolase activity                                                         | GO:0016787 | 14641 | 2220 | 1.007516879 | 0.255171 | 0.336936937 | 0.436478   | 0.003034277  | 0.395316    | 0.394594595 | -1         |
| biological_process | glycerolipid catabolic process                                             | GO:0046503 | 16516 | 21   | 1.082756727 | 0.255511 | 0.23963964  | 0.369878   | 0.002606273  | 0.491762    | 0.482882883 | -1         |
| biological_process | vesicle organization                                                       | GO:0016050 | 16458 | 79   | 1.042497074 | 0.25599  | 0.291891892 | 0.370823   | 0.034983857  | 0.294663    | 0.336936937 | -1         |
| biological_process | negative regulation of tumor necrosis factor production                    | GO:0032720 | 16509 | 28   | 1.071427802 | 0.256179 | 0.30990991  | 0.370748   | 0.941242342  | 0.705072    | 0.686486486 | -1         |
| biological_process | gamete generation                                                          | GO:0007276 | 16132 | 405  | 1.018559964 | 0.25627  | 0.308108108 | 0.370623   | 0.04584626   | 0.0528395   | 0.167567568 | 0.189531   |
| biological_process | regulation of actin filament depolymerization                              | GO:0030834 | 16513 | 24   | 1.076282438 | 0.258584 | 0.246846847 | 0.372792   | 0.053657701  | 0.324341    | 0.30990991  | -1         |
| biological_process | Golgi to plasma membrane protein transport                                 | GO:0043001 | 16514 | 23   | 1.077826976 | 0.258849 | 0.302702703 | 0.373334   | 0.970821411  | 0.595842    | 0.571171717 | -1         |
| biological_process | acute-phase response                                                       | GO:0006953 | 16502 | 35   | 1.063020297 | 0.259005 | 0.336936937 | 0.373531   | 0.052364283  | 0.295597    | 0.290090909 | -1         |
| cellular_component | transport vesicle                                                          | GO:0030133 | 16726 | 97   | 1.037627217 | 0.259875 | 0.284684685 | 0.415963   | 0.166663617  | 0.00217661  | 0.001801802 | 0          |
| biological_process | positive regulation of canonical Wnt receptor signaling pathway            | GO:0090263 | 16490 | 47   | 1.054071107 | 0.260133 | 0.266666667 | 0.375378</ |              |             |             |            |

|                    |                                                                                       |            |       |      |               |          |             |          |             |             |             |            |
|--------------------|---------------------------------------------------------------------------------------|------------|-------|------|---------------|----------|-------------|----------|-------------|-------------|-------------|------------|
| biological_process | CD4-positive, alpha-beta T cell differentiation involved in immune response           | GO:0002294 | 16509 | 28   | 1.068559938   | 0.26472  | 0.291891892 | 0.380424 | 1.151879151 | 0.0817853   | 0.140540541 | 0.240073   |
| biological_process | T-helper cell differentiation                                                         | GO:0042093 | 16509 | 28   | 1.068559938   | 0.26472  | 0.291891892 | 0.380424 | 1.151879151 | 0.0817853   | 0.140540541 | 0.240073   |
| biological_process | mammary gland alveolus development                                                    | GO:0060749 | 16516 | 21   | 1.078996255   | 0.265205 | 0.29009009  | 0.380611 | 0.936322919 | 0.693503    | 0.655855856 | -1         |
| biological_process | mammary gland lobule development                                                      | GO:0061377 | 16516 | 21   | 1.078996255   | 0.265205 | 0.29009009  | 0.380611 | 0.936322919 | 0.693503    | 0.655855856 | -1         |
| biological_process | I-kappa B kinase/NF-kappaB cascade                                                    | GO:0007249 | 16366 | 171  | 1.027543027   | 0.265297 | 0.243243243 | 0.380484 | 0.994919134 | 0.546093    | 0.578378378 | -1         |
| biological_process | regulation of viral reproduction                                                      | GO:0050792 | 16481 | 56   | 1.048230068   | 0.265607 | 0.282882883 | 0.380755 | 1.04291545  | 0.288712    | 0.232432432 | -1         |
| molecular_function | calcium-dependent phospholipid binding                                                | GO:0005544 | 16838 | 23   | 1.075235459   | 0.265864 | 0.221621622 | 0.445875 | 0.953407551 | 0.650743    | 0.666666667 | -1         |
| biological_process | regulation of humoral immune response                                                 | GO:0002920 | 16514 | 23   | 1.07521375    | 0.265928 | 0.300900901 | 0.381314 | 0.891325704 | 0.816488    | 0.720720721 | -1         |
| biological_process | chondroitin sulfate proteoglycan metabolic process                                    | GO:0050654 | 16516 | 21   | 1.078120923   | 0.267488 | 0.311717172 | 0.382518 | 1.215933864 | 0.0431719   | 0.027027027 | 0.174566   |
| biological_process | mast cell activation                                                                  | GO:0045576 | 16500 | 37   | 1.058662844   | 0.268054 | 0.225225225 | 0.38292  | 1.062183004 | 0.255964    | 0.147747748 | 0.467334   |
| molecular_function | protein phosphorylated amino acid binding                                             | GO:0045309 | 16839 | 22   | 1.075981107   | 0.268397 | 0.286486486 | 0.449724 | 1.120422106 | 0.163801    | 0.097297297 | 0.318011   |
| biological_process | regulation of gastrulation                                                            | GO:0010470 | 16510 | 27   | 1.068546021   | 0.26849  | 0.308108108 | 0.383538 | 0.788319529 | 0.971726    | 0.89009009  | -1         |
| biological_process | response to lithium ion                                                               | GO:0010226 | 16509 | 28   | 1.067298769   | 0.268521 | 0.311717172 | 0.383378 | 1.135285277 | 0.107313    | 0.045045045 | 0.272121   |
| biological_process | proteoglycan biosynthetic process                                                     | GO:0030166 | 16506 | 31   | 1.063801854   | 0.269005 | 0.331531532 | 0.383737 | 1.184252126 | 0.0376586   | 0.081081081 | 0.161476   |
| molecular_function | ubiquitin-specific protease activity                                                  | GO:0004843 | 16821 | 40   | 1.055883727   | 0.269972 | 0.430630631 | 0.451208 | 1.142804076 | 0.0586484   | 0.227027027 | 0.101199   |
| biological_process | cellular response to steroid hormone stimulus                                         | GO:0071383 | 16430 | 107  | 1.034060364   | 0.270212 | 0.212612613 | 0.384474 | 1.005310846 | 0.462001    | 0.464864865 | -1         |
| biological_process | viral reproductive process                                                            | GO:0022415 | 16425 | 112  | 1.03300642    | 0.271918 | 0.277477477 | 0.386881 | 1.031959045 | 0.278347    | 0.25045045  | 0.496322   |
| biological_process | somatic recombination of immunoglobulin gene segments                                 | GO:0016447 | 16500 | 37   | 1.057476383   | 0.272193 | 0.291891892 | 0.386849 | 0.926439482 | 0.781111    | 0.747747748 | -1         |
| molecular_function | metalloendopeptidase activity                                                         | GO:0004222 | 16764 | 97   | 1.03540755    | 0.272341 | 0.358558559 | 0.451681 | 1.098323412 | 0.0462704   | 0.165765766 | 0.0807651  |
| cellular_component | intermediate filament                                                                 | GO:0005882 | 16766 | 57   | 1.046216911   | 0.272461 | 0.304504505 | 0.442297 | 1.166900878 | 0.0143982   | 0.023423423 | 0.00830273 |
| cellular_component | sarcomeric sarcomere                                                                  | GO:0016529 | 16776 | 47   | 1.050743677   | 0.273125 | 0.309909991 | 0.446803 | 1.164600842 | 0.0251562   | 0.054054054 | 0.0155897  |
| biological_process | intrinsic apoptotic signaling pathway in response to DNA damage by p53 class mediator | GO:0042771 | 16514 | 23   | 1.072358656   | 0.273773 | 0.299090909 | 0.388346 | 1.167549494 | 0.0818511   | 0.077477477 | 0.239952   |
| molecular_function | chemokine activity                                                                    | GO:0008009 | 16827 | 34   | 1.058963748   | 0.275554 | 0.405405405 | 0.454402 | 1.187676495 | 0.0288898   | 0.153153153 | 0.0536488  |
| biological_process | response to pH                                                                        | GO:0009268 | 16514 | 23   | 1.071643568   | 0.275756 | 0.277477477 | 0.390616 | 0.956666874 | 0.640674    | 0.67027027  | -1         |
| molecular_function | tumor necrosis factor receptor binding                                                | GO:0005164 | 16838 | 23   | 1.071305859   | 0.276689 | 0.279279279 | 0.458693 | 1.005157995 | 0.482912    | 0.524324324 | -1         |
| biological_process | positive regulation of DNA metabolic process                                          | GO:0051054 | 16450 | 87   | 1.036314096   | 0.278208 | 0.320720721 | 0.393415 | 1.026250163 | 0.335363    | 0.318918919 | -1         |
| biological_process | cellular response to mechanical stimulus                                              | GO:0071260 | 16487 | 50   | 1.047866574   | 0.278571 | 0.369369369 | 0.393429 | 1.042402776 | 0.301507    | 0.354954955 | -1         |
| biological_process | B cell mediated immunity                                                              | GO:0019724 | 16459 | 78   | 1.038263422   | 0.278717 | 0.333333333 | 0.393605 | 0.892959661 | 0.949641    | 0.897297297 | -1         |
| biological_process | regulation of skeletal muscle cell differentiation                                    | GO:2001014 | 16515 | 22   | 1.070257994   | 0.279019 | 0.281081081 | 0.394141 | 1.196075819 | 0.0554701   | 0.043243243 | 0.194223   |
| biological_process | regulation of gene expression, epigenetic                                             | GO:0040029 | 16424 | 113  | 1.03162167    | 0.279556 | 0.378378378 | 0.394525 | 1.158365861 | 0.00171761  | 0.01981982  | 0.0434861  |
| cellular_component | endoplasmic reticulum part                                                            | GO:0044432 | 16126 | 697  | 1.012484588   | 0.279924 | 0.327927923 | 0.463409 | 1.036062314 | 0.0460597   | 0.158558559 | 0.0410338  |
| biological_process | negative regulation of smooth muscle cell proliferation                               | GO:0048662 | 16513 | 24   | 1.068421728   | 0.280632 | 0.322522523 | 0.396303 | 0.882117849 | 0.841603    | 0.908108108 | -1         |
| biological_process | peptidyl-lysine modification                                                          | GO:0018205 | 16394 | 143  | 1.027837586   | 0.281315 | 0.394594595 | 0.39704  | 1.107501806 | 0.005405405 | 0.0955048   | -1         |
| biological_process | intermediate filament-based process                                                   | GO:0045103 | 16509 | 28   | 1.063035845   | 0.281569 | 0.223423423 | 0.397545 | 1.182885766 | 0.0467134   | 0.045045045 | 0.180527   |
| biological_process | mast cell mediated immunity                                                           | GO:0002448 | 16514 | 23   | 1.069450981   | 0.281878 | 0.331531532 | 0.397899 | 0.896352352 | 0.805556    | 0.836036036 | -1         |
| biological_process | mast cell degranulation                                                               | GO:0043303 | 16514 | 23   | 1.069450981   | 0.281878 | 0.331531532 | 0.397899 | 0.896352352 | 0.805556    | 0.836036036 | -1         |
| biological_process | regulation of mast cell activation                                                    | GO:0033003 | 16512 | 25   | 1.066352547   | 0.282635 | 0.356756757 | 0.398946 | 1.025002791 | 0.41424     | 0.409009009 | -1         |
| biological_process | ketone biosynthetic process                                                           | GO:0042181 | 16514 | 23   | 1.068767441   | 0.2838   | 0.302702703 | 0.399667 | 0.841758534 | 0.905821    | 0.818018018 | -1         |
| biological_process | leukocyte degranulation                                                               | GO:0043299 | 16503 | 34   | 1.055771675   | 0.286442 | 0.281081081 | 0.402281 | 0.915050729 | 0.804803    | 0.823423423 | -1         |
| biological_process | alternative mRNA splicing, via spliceosome                                            | GO:0000380 | 16513 | 24   | 1.066300344   | 0.286734 | 0.398198198 | 0.402257 | 1.141858904 | 0.114185    | 0.228828829 | 0.282425   |
| biological_process | regulation of potassium ion transport                                                 | GO:0043266 | 16505 | 32   | 1.056880088   | 0.288486 | 0.327927928 | 0.403574 | 1.086637413 | 0.197756    | 0.324324324 | 0.393688   |
| biological_process | regulation of release of sequestered calcium ion into cytosol                         | GO:0051279 | 16512 | 25   | 1.064078988   | 0.289336 | 0.338787879 | 0.405753 | 1.172600329 | 0.0673419   | 0.057657658 | 0.218532   |
| biological_process | cellular nitrogen compound biosynthetic process                                       | GO:0044271 | 13441 | 3096 | 1.005193632   | 0.289468 | 0.463063063 | 0.405641 | 1.035755249 | 0.63605     | 0.176576577 | 0.00303211 |
| biological_process | intermediate filament cytoskeleton organization                                       | GO:0045104 | 16510 | 27   | 1.061048113   | 0.291212 | 0.223423423 | 0.407493 | 1.211033157 | 0.0286607   | 0.021621622 | 0.143119   |
| biological_process | positive regulation of hormone secretion                                              | GO:0046887 | 16466 | 71   | 1.03758313    | 0.291282 | 0.302702703 | 0.407347 | 1.084067778 | 0.109434    | 0.16036036  | 0.274632   |
| biological_process | protein acylation                                                                     | GO:0043543 | 16394 | 143  | 1.026357624   | 0.291751 | 0.428828829 | 0.40742  | 1.110360246 | 0.0108451   | 0.007207207 | 0.0856718  |
| biological_process | lipoprotein metabolic process                                                         | GO:0042121 | 16451 | 86   | 1.033814211   | 0.293047 | 0.284684685 | 0.409025 | 1.062001679 | 0.159029    | 0.153153153 | -1         |
| biological_process | detection of light stimulus                                                           | GO:0009583 | 16507 | 30   | 1.056947106   | 0.294356 | 0.264864865 | 0.411437 | 0.848057794 | 0.925468    | 0.909090901 | -1         |
| molecular_function | ubiquitin thiolesterase activity                                                      | GO:0044221 | 16795 | 66   | 1.038302674   | 0.294592 | 0.457657658 | 0.482176 | 1.139879532 | 0.0242946   | 0.190990991 | 0.049978   |
| biological_process | mast cell activation involved in immune response                                      | GO:0002279 | 16513 | 24   | 1.063468472   | 0.294977 | 0.329727973 | 0.412661 | 0.890049105 | 0.824775    | 0.868468468 | -1         |
| cellular_component | inclusion body                                                                        | GO:0016234 | 16789 | 34   | 1.053131947   | 0.295585 | 0.358558559 | 0.491791 | 1.146940562 | 0.0686992   | 0.189189189 | 0.0883381  |
| biological_process | vesicle docking                                                                       | GO:0048278 | 16512 | 25   | 1.061810266   | 0.296096 | 0.306306306 | 0.415217 | 0.957782832 | 0.642798    | 0.654054054 | -1         |
| biological_process | response to reactive oxygen species                                                   | GO:0000302 | 16404 | 133  | 1.026711543   | 0.296109 | 0.356756757 | 0.415037 | 0.965899013 | 0.753023    | 0.661261261 | -1         |
| biological_process | alditol metabolic process                                                             | GO:0019400 | 16514 | 23   | 1.064398043   | 0.296232 | 0.207207207 | 0.414918 | 1.006607361 | 0.478119    | 0.484684865 | -1         |
| biological_process | negative regulation of protein binding                                                | GO:0032091 | 16503 | 34   | 1.052851474   | 0.296572 | 0.252252252 | 0.415184 | 1.100083318 | 0.155815    | 0.066666667 | 0.345742   |
| biological_process | digestion                                                                             | GO:0007586 | 16490 | 47   | 1.044916145   | 0.296647 | 0.317117117 | 0.415038 | 1.057006973 | 0.248934    | 0.282882883 | 0.457717   |
| biological_process | metanephric nephron morphogenesis                                                     | GO:0072273 | 16515 | 22   | 1.065351653   | 0.297627 | 0.313513514 | 0.416451 | 1.137736154 | 0.131421    | 0.201801802 | 0.311115   |
| biological_process | positive regulation of cell division                                                  | GO:0051781 | 16500 | 37   | 1.049991548   | 0.299011 | 0.313513514 | 0.417824 | 1.139508862 | 0.0705845   | 0.057657658 | 0.22101    |
| biological_process | T cell homeostasis                                                                    | GO:0043029 | 16513 | 24   | 1.061699813   | 0.300179 | 0.327927928 | 0.419076 | 1.137953744 | 0.120717    | 0.189189189 | 0.294322   |
| biological_process | somatic recombination of immunoglobulin genes involved in immune response             | GO:0002204 | 16506 | 31   | 1.054185649   | 0.300487 | 0.286486486 | 0.418682 | 0.922125713 | 0.773905    | 0.803603604 | -1         |
| biological_process | somatic diversification of immunoglobulins involved in immune response                | GO:0002208 | 16506 | 31   | 1.054185649   | 0.300487 | 0.286486486 | 0.418682 | 0.922125713 | 0.773905    | 0.803603604 | -1         |
| biological_process | isotype switching                                                                     | GO:0045190 | 16506 | 31   | 1.054185649   | 0.300487 | 0.286486486 | 0.418682 | 0.922125713 | 0.773905    | 0.803603604 | -1         |
| biological_process | cellular aldehyde metabolic process                                                   | GO:0006081 | 16509 | 28   | 1.057019378   | 0.300488 | 0.338738739 | 0.418495 | 0.717328707 | 0.995243    | 0.954954955 | -1         |
| biological_process | maintenance of protein location                                                       | GO:0045185 | 16450 | 87   | 1.03221485    | 0.300915 | 0.318918919 | 0.418807 | 1.093232313 | 0.0655003   | 0.120720721 | 0.218294   |
| biological_process | muscle adaptation                                                                     | GO:0043500 | 16500 | 37   | 1.049468591   | 0.300929 | 0.372972973 | 0.418627 | 1.056525253 | 0.275534    | 0.232432432 | 0.492746   |
| biological_process | positive regulation of receptor-mediated endocytosis                                  | GO:0048260 | 16510 | 27   | 1.057912786   | 0.300973 | 0.34954955  | 0.418463 | 1.135104516 | 0.111818    | 0.113513514 | 0.277811   |
| biological_process | cell cycle arrest                                                                     | GO:0007050 | 16428 | 109  | 1.028721256   | 0.301171 | 0.331531532 | 0.418647 | 1.048889499 | 0.187551    | 0.205405405 | 0.38193    |
| biological_process | cellular response to nutrient                                                         | GO:0031670 | 16510 | 27   | 1.057594775   | 0.301971 | 0.291891892 | 0.418906 | 1.112265905 | 0.155961    | 0.151351351 | 0.345641   |
| biological_process | unsaturated fatty acid biosynthetic process                                           | GO:0006636 | 16501 | 36   | 1.049730705   | 0.302459 | 0.345945946 | 0.419251 | 1.053657701 | 0.288355    | 0.286486486 | -1         |
| biological_process | cellular component assembly involved in morphogenesis                                 | GO:0010927 | 16403 | 134  | 1.025646737   | 0.302815 | 0.344144144 | 0.419523 | 1.061457644 | 0.107992    | 0.181981982 | 0.27307    |
| biological_process | transcription factor import into nucleus                                              | GO:0042991 | 16479 | 58   | 1.038299777   | 0.30641  | 0.335135135 | 0.423954 | 0.941277341 | 0.781139    | 0.708108108 | -1         |
| biological_process | cartilage development involved in endochondral bone morphogenesis                     | GO:0060351 | 16516 | 21   | 1.063562772   | 0.306842 | 0.347747748 | 0.424267 | 1.232686103 | 0.0322966   | 0.036036036 | 0.149504   |
| biological_process | monosaccharide catabolic process                                                      | GO:0046365 | 16463 | 74   | 1.033771683   | 0.307036 | 0.389189189 | 0.424445 | 0.904494863 | 0.923108    | 0.875675676 | -1         |
| biological_process | cellular response to tumor necrosis factor                                            | GO:0071356 | 16473 | 64   | 1.036291074</ |          |             |          |             |             |             |            |

|                    |                                                                                              |            |       |     |             |          |             |          |             |             |             |           |
|--------------------|----------------------------------------------------------------------------------------------|------------|-------|-----|-------------|----------|-------------|----------|-------------|-------------|-------------|-----------|
| biological_process | somatic diversification of immunoglobulins                                                   | GO:0016445 | 16498 | 39  | 1.045691561 | 0.31038  | 0.291891892 | 0.426484 | 0.896893117 | 0.867933    | 0.836036036 | -1        |
| biological_process | female pregnancy                                                                             | GO:0007565 | 16408 | 129 | 1.024929781 | 0.311244 | 0.338738739 | 0.427298 | 1.046501033 | 0.17923     | 0.225225225 | 0.374282  |
| cellular_component | intermediate filament cytoskeleton                                                           | GO:0045111 | 16727 | 96  | 1.028771455 | 0.312187 | 0.306306306 | -1       | 1.110295661 | 0.0302468   | 0.057657658 | 0.021846  |
| biological_process | fatty acid biosynthetic process                                                              | GO:0006633 | 16419 | 118 | 1.025930334 | 0.312254 | 0.335135135 | 0.428195 | 1.020034289 | 0.352629    | 0.38018018  | -1        |
| biological_process | induction of programmed cell death                                                           | GO:0012502 | 16382 | 155 | 1.022383906 | 0.313906 | 0.288288288 | 0.429203 | 0.941670209 | 0.896855    | 0.927927928 | -1        |
| biological_process | polyol metabolic process                                                                     | GO:0019751 | 16457 | 80  | 1.030979047 | 0.315244 | 0.320720721 | 0.43182  | 1.036191303 | 0.287063    | 0.308108108 | -1        |
| molecular_function | palmitoyltransferase activity                                                                | GO:0016409 | 16840 | 21  | 1.060480428 | 0.315495 | 0.203603604 | -1       | 0.998537784 | 0.504644    | 0.472072072 | -1        |
| biological_process | regulation of transcription factor import into nucleus                                       | GO:0042990 | 16481 | 56  | 1.036903302 | 0.315938 | 0.362162162 | 0.432534 | 0.928075652 | 0.824825    | 0.744144144 | -1        |
| biological_process | specification of organ identity                                                              | GO:0010092 | 16509 | 28  | 1.052225209 | 0.315962 | 0.347747748 | 0.432355 | 1.185909117 | 0.0440669   | 0.153153153 | 0.175585  |
| biological_process | somatic diversification of immune receptors via germline recombination within a single locus | GO:0002562 | 16494 | 43  | 0.041610236 | 0.318044 | 0.344144144 | 0.435444 | 0.954475877 | 0.6977      | 0.652252252 | -1        |
| biological_process | somatic cell DNA recombination                                                               | GO:0016444 | 16494 | 43  | 0.041610236 | 0.318044 | 0.344144144 | 0.435444 | 0.954475877 | 0.6977      | 0.652252252 | -1        |
| biological_process | positive chemotaxis                                                                          | GO:0050918 | 16501 | 36  | 0.045447626 | 0.318191 | 0.335135135 | 0.435335 | 1.19668904  | 0.0203642   | 0.023423423 | 0.126336  |
| biological_process | induction of apoptosis                                                                       | GO:0006917 | 16384 | 153 | 0.021931889 | 0.318471 | 0.297297297 | 0.435302 | 0.946533882 | 0.875103    | 0.911717171 | -1        |
| cellular_component | spindle                                                                                      | GO:0005819 | 16605 | 218 | 0.018265193 | 0.319123 | 0.459459459 | -1       | 1.025043412 | 0.259569    | 0.209009009 | 0.421183  |
| biological_process | insulin secretion                                                                            | GO:0030073 | 16421 | 116 | 0.025115885 | 0.319133 | 0.383783784 | 0.435743 | 1.070787239 | 0.0925496   | 0.203603604 | 0.25378   |
| biological_process | regulation of DNA binding                                                                    | GO:0051101 | 16476 | 61  | 0.034586474 | 0.319643 | 0.309909991 | 0.436095 | 1.02165843  | 0.384577    | 0.389189189 | -1        |
| biological_process | cholesterol biosynthetic process                                                             | GO:0006695 | 16502 | 35  | 0.045564336 | 0.320124 | 0.320720721 | 0.43643  | 0.959970701 | 0.659345    | 0.641441441 | -1        |
| cellular_component | nuclear outer membrane-endoplasmic reticulum membrane network                                | GO:0042175 | 16194 | 629 | 0.010554396 | 0.320139 | 0.421621622 | -1       | 1.042226179 | 0.0307718   | 0.167567568 | 0.0356832 |
| molecular_function | inorganic anion transmembrane transporter activity                                           | GO:0015103 | 16768 | 93  | 0.027833171 | 0.320541 | 0.363963964 | -1       | 0.903258269 | 0.947432    | 0.854054054 | -1        |
| biological_process | multicellular organismal movement                                                            | GO:0050879 | 16505 | 32  | 0.047469911 | 0.320779 | 0.261261261 | 0.436922 | 1.161087412 | 0.0570708   | 0.01981982  | 0.198275  |
| biological_process | musculoskeletal movement                                                                     | GO:0050881 | 16505 | 32  | 0.047469911 | 0.320779 | 0.261261261 | 0.436922 | 1.161087412 | 0.0570708   | 0.01981982  | 0.198275  |
| biological_process | interferon-gamma production                                                                  | GO:0032609 | 16473 | 64  | 0.03346802  | 0.321109 | 0.4         | 0.436918 | 0.933585978 | 0.82177     | 0.814414414 | -1        |
| biological_process | negative regulation of G-protein coupled receptor protein signaling pathway                  | GO:0045744 | 16476 | 61  | 0.034071018 | 0.322144 | 0.427027027 | 0.438825 | 1.085134907 | 0.124294    | 0.241441441 | 0.300432  |
| molecular_function | ubiquitin binding                                                                            | GO:0043130 | 16803 | 58  | 0.034923096 | 0.322237 | 0.378378378 | -1       | 1.031847417 | 0.336947    | 0.288282828 | -1        |
| biological_process | regulation of muscle adaptation                                                              | GO:0043502 | 16514 | 23  | 0.05496248  | 0.322302 | 0.376576577 | 0.438971 | 1.043113658 | 0.360045    | 0.322525223 | -1        |
| biological_process | chromatin silencing                                                                          | GO:0006342 | 16510 | 27  | 0.051073296 | 0.322759 | 0.336936937 | 0.43929  | 1.085521573 | 0.220563    | 0.297297297 | 0.419519  |
| biological_process | regulation of meiotic cell cycle                                                             | GO:0051445 | 16511 | 26  | 0.051772371 | 0.323633 | 0.317117117 | 0.439851 | 1.019199261 | 0.432642    | 0.445045045 | -1        |
| biological_process | regulation of interleukin-10 production                                                      | GO:0032653 | 16513 | 24  | 0.053884452 | 0.323649 | 0.333333333 | 0.439914 | 1.072397433 | 0.269368    | 0.275675676 | 0.485111  |
| biological_process | T cell apoptotic process                                                                     | GO:0070231 | 16516 | 21  | 0.057504554 | 0.32395  | 0.358558559 | 0.440639 | 1.112736843 | 0.185296    | 0.243243243 | 0.378997  |
| biological_process | regulation of establishment of protein localization to plasma membrane                       | GO:0090003 | 16516 | 21  | 0.057354826 | 0.324378 | 0.331531532 | 0.44094  | 1.056600429 | 0.326535    | 0.300909091 | -1        |
| cellular_component | histone methyltransferase complex                                                            | GO:0035097 | 16763 | 60  | 0.033480504 | 0.326361 | 0.406303061 | -1       | 1.05348113  | 0.0783964   | 0.090909099 | 0.131943  |
| biological_process | potassium ion transport                                                                      | GO:0006813 | 16430 | 107 | 0.024886333 | 0.327341 | 0.418018018 | 0.44445  | 1.139537423 | 0.00606871  | 0.172972973 | 0.0649376 |
| biological_process | response to interferon-gamma                                                                 | GO:0034341 | 16483 | 54  | 0.034756163 | 0.328864 | 0.347747748 | 0.445885 | 1.065220336 | 0.202861    | 0.25045045  | 0.39975   |
| biological_process | male meiosis                                                                                 | GO:0007140 | 16507 | 30  | 0.046643529 | 0.328933 | 0.34954955  | 0.445727 | 1.214427371 | 0.0208707   | 0.072072072 | 0.125578  |
| biological_process | regulated secretory pathway                                                                  | GO:0045055 | 16496 | 41  | 0.039746357 | 0.329493 | 0.327927928 | 0.44635  | 0.913240536 | 0.832347    | 0.866666667 | -1        |
| molecular_function | small conjugating protein-specific protease activity                                         | GO:0019783 | 16813 | 48  | 0.03657946  | 0.330124 | 0.448648649 | -1       | 1.099571237 | 0.115377    | 0.275675676 | 0.198607  |
| biological_process | lysosomal transport                                                                          | GO:0007041 | 16504 | 33  | 0.04403795  | 0.330486 | 0.427027027 | 0.447472 | 1.175240355 | 0.0404613   | 0.066666667 | 0.166312  |
| biological_process | DNA modification                                                                             | GO:0006304 | 16484 | 53  | 0.034683992 | 0.330691 | 0.381981982 | 0.447394 | 1.270115124 | 0.000322998 | 0.003603604 | 0.0142166 |
| biological_process | myeloid cell activation involved in immune response                                          | GO:0002275 | 16490 | 47  | 0.036826432 | 0.33074  | 0.32972973  | 0.447225 | 0.940596411 | 0.760048    | 0.735135135 | -1        |
| biological_process | regulation of meiosis                                                                        | GO:0040020 | 16513 | 24  | 1.0515212   | 0.330892 | 0.335135135 | 0.447116 | 0.997070663 | 0.509942    | 0.502702703 | -1        |
| biological_process | organophosphate ester transport                                                              | GO:0015748 | 16488 | 49  | 0.035318511 | 0.334032 | 0.306306306 | 0.45048  | 1.018370474 | 0.411763    | 0.428828829 | -1        |
| biological_process | regulation of phagocytosis                                                                   | GO:0050764 | 16496 | 41  | 0.038563564 | 0.33426  | 0.367567568 | 0.450416 | 1.096420163 | 0.142162    | 0.140540541 | 0.331988  |
| biological_process | negative regulation of epithelial cell migration                                             | GO:0010633 | 16511 | 26  | 0.048386219 | 0.334459 | 0.295495495 | 0.450334 | 1.022534249 | 0.421073    | 0.425225225 | -1        |
| biological_process | hormone-mediated signaling pathway                                                           | GO:0009755 | 16464 | 73  | 0.028624914 | 0.335601 | 0.320720721 | 0.451299 | 1.050615023 | 0.226431    | 0.282882883 | 0.424359  |
| biological_process | inositol phosphate metabolic process                                                         | GO:0043647 | 16505 | 32  | 0.043154079 | 0.336078 | 0.405405405 | 0.45211  | 1.053452365 | 0.300072    | 0.354954955 | -1        |
| biological_process | cGMP biosynthetic process                                                                    | GO:0006182 | 16514 | 23  | 0.050685178 | 0.336776 | 0.34954955  | 0.453051 | 1.000019087 | 0.499956    | 0.506303606 | -1        |
| molecular_function | aspartic-type endopeptidase activity                                                         | GO:0044190 | 16841 | 20  | 0.054211326 | 0.337187 | 0.315135135 | -1       | 0.912881619 | 0.750246    | 0.636036036 | -1        |
| molecular_function | aspartic-type peptidase activity                                                             | GO:0070001 | 16841 | 20  | 0.054211326 | 0.337187 | 0.315135135 | -1       | 0.912881619 | 0.750246    | 0.636036036 | -1        |
| biological_process | dopamine metabolic process                                                                   | GO:0042417 | 16507 | 30  | 0.042167053 | 0.337309 | 0.398198198 | 0.453168 | 1.226343402 | 0.0158077   | 0.028828829 | 0.108692  |
| molecular_function | metallooxpeptidase activity                                                                  | GO:0008235 | 16829 | 32  | 0.042770653 | 0.337443 | 0.344144144 | -1       | 0.910980153 | 0.806693    | 0.879279279 | -1        |
| biological_process | cell fate determination                                                                      | GO:0001709 | 16509 | 28  | 0.045591115 | 0.337913 | 0.322522523 | 0.455015 | 1.049620809 | 0.324508    | 0.338738739 | -1        |
| cellular_component | SWI/SNF superfamily-type complex                                                             | GO:0070603 | 16768 | 55  | 1.03234396  | 0.338655 | 0.356756757 | -1       | 1.127575931 | 0.0503515   | 0.093693694 | 0.0527829 |
| biological_process | histone phosphorylation                                                                      | GO:0016572 | 16516 | 21  | 0.052361979 | 0.338765 | 0.428828829 | 0.456281 | 1.112218555 | 0.186398    | 0.255855856 | 0.381195  |
| biological_process | positive regulation of transcription factor import into nucleus                              | GO:0042993 | 16511 | 26  | 0.046809425 | 0.339548 | 0.387387387 | 0.457266 | 0.823518733 | 0.940615    | 0.872072072 | -1        |
| biological_process | negative regulation of secretion                                                             | GO:0051048 | 16415 | 122 | 0.021535514 | 0.339654 | 0.396396396 | 0.457128 | 0.978314492 | 0.661478    | 0.610810811 | -1        |
| cellular_component | nuclear chromosome, telomeric region                                                         | GO:0000784 | 16803 | 20  | 0.053239986 | 0.339941 | 0.304504505 | -1       | 1.088796353 | 0.245658    | 0.140540541 | 0.406067  |
| biological_process | B cell homeostasis                                                                           | GO:0001782 | 16514 | 23  | 0.049354904 | 0.340822 | 0.362162162 | 0.458579 | 0.933363416 | 0.710202    | 0.818018018 | -1        |
| biological_process | symbiosis, encompassing mutualism through parasitism                                         | GO:0044403 | 16428 | 109 | 0.022582469 | 0.341029 | 0.356756757 | 0.4583   | 0.993809051 | 0.544745    | 0.578378378 | -1        |
| biological_process | interspecies interaction between organisms                                                   | GO:0044419 | 16428 | 109 | 0.022582469 | 0.341029 | 0.356756757 | 0.4583   | 0.993809051 | 0.544745    | 0.578378378 | -1        |
| biological_process | regulation of peptide secretion                                                              | GO:0002791 | 16429 | 108 | 0.022651565 | 0.341267 | 0.358558559 | 0.45804  | 1.045994068 | 0.20311     | 0.282882883 | 0.399507  |
| biological_process | regulation of peptide transport                                                              | GO:0090087 | 16429 | 108 | 0.022651565 | 0.341267 | 0.358558559 | 0.45804  | 1.045994068 | 0.20311     | 0.282882883 | 0.399507  |
| biological_process | positive regulation of protein ubiquitination                                                | GO:0031398 | 16475 | 62  | 0.029819397 | 0.341857 | 0.356756757 | 0.458667 | 1.075663139 | 0.150611    | 0.144144144 | 0.341241  |
| biological_process | positive regulation of peptidase activity                                                    | GO:0010952 | 16431 | 106 | 0.022770851 | 0.34189  | 0.383783784 | 0.458485 | 0.99091729  | 0.564569    | 0.569369369 | -1        |
| biological_process | purine ribonucleotide biosynthetic process                                                   | GO:0009152 | 16359 | 178 | 0.017455857 | 0.34254  | 0.374774775 | 0.459148 | 0.984063123 | 0.644435    | 0.63963964  | -1        |
| biological_process | interleukin-10 production                                                                    | GO:0032613 | 16510 | 27  | 0.044968369 | 0.342736 | 0.331531532 | 0.459063 | 1.078310323 | 0.2403      | 0.268468468 | 0.443105  |
| biological_process | B cell activation involved in immune response                                                | GO:0002312 | 16498 | 39  | 0.037266492 | 0.343278 | 0.365765766 | 0.459423 | 0.948882337 | 0.710088    | 0.726126126 | -1        |
| biological_process | positive regulation of biomineral tissue development                                         | GO:0070169 | 16507 | 30  | 0.042362465 | 0.343764 | 0.385585586 | 0.459513 | 1.070060384 | 0.252954    | 0.363963964 | 0.462655  |
| molecular_function | retinoic acid receptor binding                                                               | GO:0042974 | 16841 | 20  | 0.05187471  | 0.343827 | 0.354954946 | -1       | 1.100593754 | 0.217798    | 0.151351351 | 0.393451  |
| biological_process | response to mineralocorticoid stimulus                                                       | GO:0051385 | 16507 | 30  | 0.042181064 | 0.344398 | 0.403603604 | 0.460401 | 0.966835145 | 0.623609    | 0.688282828 | -1        |
| cellular_component | vasodilation                                                                                 | GO:0042311 | 16489 | 48  | 0.032955311 | 0.346054 | 0.394594595 | 0.462137 | 1.10461123  | 0.104352    | 0.169369369 | 0.266049  |
| molecular_function | metallopeptidase activity                                                                    | GO:0008237 | 16698 | 163 | 0.017811782 | 0.346114 | 0.427027027 | -1       | 1.048060593 | 0.142767    | 0.18018018  | 0.287142  |
| biological_process | positive regulation of phagocytosis                                                          | GO:0050766 | 16507 | 30  | 0.041447397 | 0.346967 | 0.389189189 | 0.462955 | 1.170580731 | 0.0526447   | 0.135135135 | 0.189148  |
| biological_process | negative regulation of gene expression, epigenetic                                           | GO:0045814 | 16506 | 31  | 0.040516205 | 0.34788  | 0.365765766 | 0.464476 | 1.046644829 | 0.32628     | 0.358558559 | -1        |
| biological_process | hippocampus development                                                                      | GO:0021766 | 16480 | 57  | 0.029789147 | 0.348205 | 0.333333333 | 0.464469 | 1.016068441 | 0.416665    | 0.405405405 | -1        |
| biological_process | response to growth hormone stimulus                                                          | GO:0060416 | 16517 | 20  | 0.050094179 | 0.348916 | 0.302702703 |          |             |             |             |           |

|                    |                                                                              |            |       |     |             |          |             |          |             |             |             |            |
|--------------------|------------------------------------------------------------------------------|------------|-------|-----|-------------|----------|-------------|----------|-------------|-------------|-------------|------------|
| biological_process | intrinsic apoptotic signaling pathway by p53 class mediator                  | GO:0072332 | 16507 | 30  | 1.03992766  | 0.35231  | 0.372972973 | 0.471296 | 1.149562401 | 0.077782    | 0.084684685 | 0.234029   |
| biological_process | alcohol catabolic process                                                    | GO:0046164 | 16493 | 44  | 1.032825902 | 0.352864 | 0.342342342 | 0.471886 | 0.928009099 | 0.796243    | 0.747747748 | -1         |
| biological_process | phototransduction                                                            | GO:0007602 | 16514 | 23  | 1.045285212 | 0.353314 | 0.356756757 | 0.472413 | 0.847531819 | 0.897505    | 0.886486486 | -1         |
| biological_process | membrane docking                                                             | GO:0022406 | 16505 | 32  | 1.038380964 | 0.353318 | 0.383783784 | 0.47221  | 0.943772778 | 0.709359    | 0.672072072 | -1         |
| biological_process | response to hydrogen peroxide                                                | GO:0042542 | 16450 | 87  | 1.023225422 | 0.353401 | 0.385585586 | 0.472057 | 0.918951116 | 0.905399    | 0.83963964  | -1         |
| biological_process | regulation of ATPase activity                                                | GO:0043462 | 16515 | 22  | 1.045952739 | 0.354377 | 0.381981982 | 0.474041 | 0.891789364 | 0.810507    | 0.781981982 | -1         |
| biological_process | somatic diversification of immune receptors                                  | GO:0002200 | 16492 | 45  | 1.032101886 | 0.354405 | 0.365765766 | 0.47408  | 0.927622965 | 0.800153    | 0.745945946 | -1         |
| biological_process | negative regulation of amine transport                                       | GO:0051953 | 16513 | 24  | 1.043816696 | 0.354936 | 0.392792793 | 0.474426 | 0.993009296 | 0.523688    | 0.497297297 | -1         |
| biological_process | positive regulation of epithelial cell differentiation                       | GO:0030858 | 16508 | 29  | 1.039323546 | 0.356784 | 0.401801802 | 0.475574 | 1.043005778 | 0.344047    | 0.412612612 | -1         |
| biological_process | regulation of Rac protein signal transduction                                | GO:0035020 | 16512 | 25  | 1.042344728 | 0.356827 | 0.425225225 | 0.475394 | 1.135908951 | 0.119422    | 0.275675676 | 0.292405   |
| molecular_function | protein kinase activator activity                                            | GO:0030295 | 16823 | 38  | 1.034288285 | 0.356996 | 0.403603604 | -1       | 1.163566907 | 0.0401961   | 0.063063063 | 0.0676434  |
| biological_process | positive regulation of mitotic cell cycle                                    | GO:0045931 | 16508 | 29  | 1.03915257  | 0.35738  | 0.409009009 | 0.47598  | 1.083318504 | 0.218345    | 0.214414414 | 0.418028   |
| cellular_component | spindle pole                                                                 | GO:0000922 | 16726 | 97  | 1.021155893 | 0.358703 | 0.457657658 | -1       | 1.065048785 | 0.132881    | 0.082882883 | 0.229079   |
| biological_process | sulfur compound transport                                                    | GO:0072348 | 16513 | 24  | 1.042153853 | 0.360206 | 0.36036036  | 0.478184 | 0.887796709 | 0.829665    | 0.864864865 | -1         |
| biological_process | response to food                                                             | GO:0032094 | 16515 | 22  | 1.044017795 | 0.360246 | 0.362162162 | 0.478001 | 1.089104192 | 0.234429    | 0.286486486 | 0.432968   |
| cellular_component | endosome membrane                                                            | GO:0010008 | 16589 | 234 | 1.013398173 | 0.360344 | 0.421621622 | -1       | 0.993585197 | 0.567976    | 0.527927928 | -1         |
| biological_process | cellular response to corticosteroid stimulus                                 | GO:0071384 | 16501 | 36  | 1.034328415 | 0.360509 | 0.410810811 | 0.477975 | 0.945945811 | 0.713087    | 0.659459459 | -1         |
| biological_process | cellular response to glucocorticoid stimulus                                 | GO:0071385 | 16501 | 36  | 1.034328415 | 0.360509 | 0.410810811 | 0.477975 | 0.945945811 | 0.713087    | 0.659459459 | -1         |
| biological_process | histone lysine methylation                                                   | GO:0034968 | 16482 | 55  | 1.027347591 | 0.362485 | 0.349459459 | 0.480334 | 1.296847929 | 6.69E-05    | 0.009009009 | 0.00302296 |
| molecular_function | RNA polymerase II transcription factor binding transcription factor activity | GO:0001076 | 16781 | 80  | 1.022603252 | 0.362798 | 0.390990991 | -1       | 1.125374342 | 0.0257704   | 0.028828829 | 0.0499352  |
| molecular_function | DNA-directed DNA polymerase activity                                         | GO:0003887 | 16834 | 27  | 1.038957425 | 0.362838 | 0.349459459 | -1       | 1.001397602 | 0.494988    | 0.461261261 | -1         |
| biological_process | positive regulation of fatty acid metabolic process                          | GO:0045923 | 16516 | 21  | 1.044069362 | 0.36318  | 0.409009009 | 0.481227 | 1.019848008 | 0.437388    | 0.407207207 | -1         |
| biological_process | phosphatidylcholine metabolic process                                        | GO:0046470 | 16511 | 26  | 1.039567339 | 0.363288 | 0.347747748 | 0.481086 | 0.965230134 | 0.620723    | 0.616216216 | -1         |
| biological_process | protein localization to chromosome                                           | GO:0034502 | 16514 | 23  | 1.041967414 | 0.363616 | 0.427027027 | 0.481528 | 1.172612948 | 0.0756695   | 0.122522523 | 0.22965    |
| biological_process | regulation of calcium ion transport                                          | GO:0051924 | 16436 | 101 | 1.01988199  | 0.364263 | 0.454054054 | 0.48172  | 1.072306284 | 0.103393    | 0.234234234 | 0.26525    |
| biological_process | regulation of histone methylation                                            | GO:0031060 | 16513 | 24  | 1.040763112 | 0.364635 | 0.392792793 | 0.481742 | 1.14225223  | 0.000232052 | 0.005405405 | 0.0148401  |
| molecular_function | GTPase activity                                                              | GO:0003924 | 16584 | 277 | 1.011798692 | 0.365819 | 0.430630631 | -1       | 0.961091861 | 0.870958    | 0.816216216 | -1         |
| biological_process | regulation of inflammatory response to antigenic stimulus                    | GO:0002861 | 16515 | 22  | 1.041857474 | 0.366839 | 0.423423423 | 0.484679 | 0.762554885 | 0.973221    | 0.884684685 | -1         |
| biological_process | T cell differentiation involved in immune response                           | GO:0002292 | 16508 | 29  | 1.036362748 | 0.367145 | 0.425225225 | 0.484452 | 1.143339303 | 0.0904255   | 0.145945946 | 0.250711   |
| biological_process | alpha-beta T cell differentiation involved in immune response                | GO:0002293 | 16508 | 29  | 1.036362748 | 0.367145 | 0.425225225 | 0.484452 | 1.143339303 | 0.0904255   | 0.145945946 | 0.250711   |
| biological_process | negative regulation of endocytosis                                           | GO:0045806 | 16515 | 22  | 1.041692564 | 0.367344 | 0.331531532 | 0.484588 | 1.198741864 | 0.0530844   | 0.036036036 | 0.190068   |
| biological_process | regulation of cell cycle process                                             | GO:0010564 | 16246 | 291 | 1.011270123 | 0.368476 | 0.441441441 | 0.485525 | 1.042970626 | 0.100111    | 0.127927928 | 0.262478   |
| biological_process | phenol-containing compound metabolic process                                 | GO:0018958 | 16471 | 66  | 1.02785169  | 0.368697 | 0.363963964 | 0.485675 | 1.021839231 | 0.379091    | 0.383783784 | -1         |
| biological_process | retina morphogenesis in camera-type eye                                      | GO:0060042 | 16505 | 32  | 1.03412182  | 0.368961 | 0.374774775 | 0.485851 | 1.067204829 | 0.254924    | 0.342342342 | 0.465395   |
| cellular_component | endosomal part                                                               | GO:0044440 | 16588 | 235 | 1.0124903   | 0.369181 | 0.425225225 | -1       | 0.993383818 | 0.570721    | 0.536936937 | -1         |
| molecular_function | tumor necrosis factor receptor superfamily binding                           | GO:0032813 | 16832 | 29  | 1.035734961 | 0.369346 | 0.363963964 | -1       | 0.997747051 | 0.5084      | 0.551351351 | -1         |
| biological_process | pigment cell differentiation                                                 | GO:0050931 | 16509 | 28  | 1.036270558 | 0.369693 | 0.273873874 | 0.4872   | 0.931442368 | 0.735306    | 0.735135135 | -1         |
| cellular_component | nuclear membrane                                                             | GO:0031965 | 16646 | 177 | 1.014316924 | 0.370059 | 0.421621622 | -1       | 1.073151389 | 0.0450775   | 0.095495495 | 0.0414938  |
| biological_process | multicellular organismal aging                                               | GO:0010259 | 16511 | 26  | 1.037441691 | 0.370362 | 0.389189189 | 0.487846 | 0.951083977 | 0.325822    | 0.252252252 | -1         |
| biological_process | tumor necrosis factor-mediated signaling pathway                             | GO:0033209 | 16514 | 23  | 1.039548733 | 0.371189 | 0.331531532 | 0.48881  | 0.899086512 | 0.799239    | 0.794594595 | -1         |
| molecular_function | transferase activity, transferring acyl groups other than amino-acyl groups  | GO:0016747 | 16673 | 188 | 1.013749302 | 0.371346 | 0.367567568 | -1       | 0.994380547 | 0.55342     | 0.508108108 | -1         |
| biological_process | polyol catabolic process                                                     | GO:0046174 | 16517 | 20  | 1.042076254 | 0.372183 | 0.297297297 | 0.489657 | 1.0670068   | 0.301772    | 0.275675676 | -1         |
| cellular_component | methyltransferase complex                                                    | GO:0034708 | 16762 | 61  | 1.024048943 | 0.372247 | 0.45045045  | -1       | 1.116274775 | 0.0575335   | 0.063063063 | 0.0592916  |
| biological_process | negative regulation of fibroblast proliferation                              | GO:0048147 | 16513 | 24  | 1.038268848 | 0.372622 | 0.405405405 | 0.490158 | 1.040118131 | 0.366695    | 0.371171717 | -1         |
| biological_process | regulation of protein ubiquitination                                         | GO:0031396 | 16426 | 111 | 1.017630262 | 0.373444 | 0.387387387 | 0.490898 | 1.113791319 | 0.0186007   | 0.028828829 | 0.115999   |
| biological_process | long-chain fatty acid transport                                              | GO:0015909 | 16502 | 35  | 1.030876037 | 0.375744 | 0.38018018  | 0.493433 | 1.032617487 | 0.368986    | 0.299099099 | -1         |
| biological_process | cellular response to alkaloid                                                | GO:0071312 | 16516 | 21  | 1.039692702 | 0.376301 | 0.414414414 | 0.493571 | 1.059358876 | 0.318674    | 0.309090901 | -1         |
| molecular_function | dipeptidase inhibitor activity                                               | GO:0004866 | 16742 | 119 | 1.016497393 | 0.377244 | 0.427027027 | -1       | 0.913809069 | 0.94891     | 0.922522523 | -1         |
| molecular_function | lipoprotein particle binding                                                 | GO:0071813 | 16841 | 20  | 1.039960338 | 0.378396 | 0.392792793 | -1       | 1.195090316 | 0.0652573   | 0.052252252 | 0.104258   |
| molecular_function | protein-lipid complex binding                                                | GO:0071814 | 16841 | 20  | 1.039960338 | 0.378396 | 0.392792793 | -1       | 1.195090316 | 0.0652573   | 0.052252252 | 0.104258   |
| biological_process | cellular protein complex assembly                                            | GO:0043623 | 16258 | 279 | 1.010587856 | 0.378722 | 0.354954955 | 0.496614 | 1.007310934 | 0.415577    | 0.427027027 | -1         |
| biological_process | placenta blood vessel development                                            | GO:0060674 | 16511 | 26  | 1.034934636 | 0.378761 | 0.365765766 | 0.496427 | 1.168217867 | 0.0685313   | 0.115315315 | 0.219584   |
| biological_process | protein deubiquitination                                                     | GO:0016579 | 16477 | 60  | 1.022936432 | 0.378952 | 0.463063063 | 0.496334 | 1.1264116   | 0.0446537   | 0.142342342 | 0.176993   |
| biological_process | embryonic placenta development                                               | GO:0001892 | 16460 | 77  | 1.020155316 | 0.379423 | 0.45045045  | 0.497065 | 1.071555411 | 0.137844    | 0.277477477 | 0.323401   |
| biological_process | neural retina development                                                    | GO:0003407 | 16506 | 31  | 1.031742638 | 0.379665 | 0.372972973 | 0.49722  | 1.027548959 | 0.395166    | 0.423423423 | -1         |
| biological_process | glucose catabolic process                                                    | GO:0006007 | 16469 | 68  | 1.021309039 | 0.38021  | 0.434234234 | 0.497781 | 0.910193806 | 0.900679    | 0.863063063 | -1         |
| biological_process | macromolecule catabolic process                                              | GO:0009057 | 15932 | 605 | 1.007010489 | 0.380502 | 0.49009009  | 0.497967 | 1.078085704 | 0.00035046  | 0.028828829 | 0.01402    |
| biological_process | proteasomal protein catabolic process                                        | GO:0010498 | 16366 | 171 | 1.013278472 | 0.381252 | 0.497297297 | 0.498228 | 1.009035174 | 0.418546    | 0.423423423 | -1         |
| molecular_function | transferase activity, transferring acyl groups                               | GO:0016746 | 16626 | 235 | 1.011283729 | 0.381446 | 0.385585586 | -1       | 0.993472045 | 0.569316    | 0.572972973 | -1         |
| biological_process | interleukin-2 production                                                     | GO:0032623 | 16496 | 41  | 1.027060085 | 0.381921 | 0.372972973 | 0.498653 | 1.000047557 | 0.499811    | 0.526126126 | -1         |
| cellular_component | nuclear replication fork                                                     | GO:0043596 | 16800 | 23  | 1.035617377 | 0.383598 | 0.347747748 | -1       | 1.147155819 | 0.110624    | 0.054054054 | 0.177855   |
| biological_process | histone methylation                                                          | GO:0016571 | 16469 | 68  | 1.020668801 | 0.383704 | 0.432432432 | -1       | 1.254334646 | 0.000136237 | 0.009009009 | 0.0107934  |
| molecular_function | guanyl nucleotide binding                                                    | GO:0019001 | 16478 | 383 | 1.008621386 | 0.383761 | 0.436036036 | -1       | 0.991796113 | 0.610773    | 0.654054054 | -1         |
| molecular_function | guanyl ribonucleotide binding                                                | GO:0032561 | 16478 | 383 | 1.008621386 | 0.383761 | 0.436036036 | -1       | 0.991796113 | 0.610773    | 0.654054054 | -1         |
| molecular_function | neurotransmitter receptor activity                                           | GO:0030594 | 16804 | 57  | 1.022317199 | 0.385049 | 0.45045045  | -1       | 1.037712367 | 0.310665    | 0.371171717 | -1         |
| biological_process | hyaluronan metabolic process                                                 | GO:0030212 | 16517 | 20  | 1.037541229 | 0.385553 | 0.434234234 | -1       | 1.115761345 | 0.184806    | 0.156756757 | 0.379475   |
| molecular_function | serine hydrolase activity                                                    | GO:0017171 | 16725 | 136 | 1.014176276 | 0.386887 | 0.365765766 | -1       | 0.972523246 | 0.711345    | 0.702702703 | -1         |
| biological_process | lymphocyte apoptotic process                                                 | GO:0070227 | 16499 | 38  | 1.026669262 | 0.38781  | 0.452252252 | -1       | 1.033629332 | 0.359635    | 0.405405405 | -1         |
| biological_process | protein acetylation                                                          | GO:0006473 | 16412 | 125 | 1.014607304 | 0.388259 | 0.454054054 | -1       | 1.085377885 | 0.0485022   | 0.052252252 | 0.182161   |
| biological_process | digestive system process                                                     | GO:0022600 | 16497 | 40  | 1.02586505  | 0.388345 | 0.381981982 | -1       | 1.103994466 | 0.154954955 | 0.154954955 | 0.304128   |
| biological_process | negative regulation of blood coagulation                                     | GO:0030195 | 16513 | 24  | 1.032796585 | 0.390334 | 0.421621622 | -1       | 1.138885943 | 0.119134    | 0.140540541 | 0.292429   |
| biological_process | negative regulation of hemostasis                                            | GO:1900047 | 16513 | 24  | 1.032796585 | 0.390334 | 0.421621622 | -1       | 1.138885943 | 0.119134    | 0.140540541 | 0.292429   |
| cellular_component | perikaryon                                                                   | GO:0043204 | 16773 | 50  | 1.02269432  | 0.390372 | 0.428828829 | -1       | 1.076303479 | 0.174657    | 0.142342342 | 0.295977   |
| biological_process | response to electrical stimulus                                              | GO:0051602 | 16507 | 30  | 1.029253218 | 0.39061  | 0.36036036  | -1       | 0.947247867 | 0.691804    | 0.762162162 | -1         |
| biological_process | phospholipid transport                                                       | GO:0015914 | 16505 | 32  | 1.02821117  | 0.39103  | 0.383783784 | -1       | 1.063550355 | 0.266566    | 0.245045045 | 0.480771   |
| biological_process | response to toxic substance                                                  | GO:0009636 |       |     |             |          |             |          |             |             |             |            |

|                    |                                                                                                              |            |       |       |             |          |             |    |              |            |             |           |
|--------------------|--------------------------------------------------------------------------------------------------------------|------------|-------|-------|-------------|----------|-------------|----|--------------|------------|-------------|-----------|
| biological_process | positive regulation of lipid biosynthetic process                                                            | GO:0046889 | 16501 | 36    | 1.025248287 | 0.396418 | 0.4         | -1 | 1.053687935  | 0.288247   | 0.311711712 | -1        |
| biological_process | regulation of inflammatory response                                                                          | GO:0050727 | 16388 | 149   | 1.01234751  | 0.396576 | 0.403603604 | -1 | 0.979313858  | 0.669843   | 0.612612613 | -1        |
| molecular_function | steroid binding                                                                                              | GO:0005496 | 16801 | 60    | 1.01946849  | 0.396796 | 0.436036036 | -1 | 1.078874292  | 0.144548   | 0.234234234 | 0.287165  |
| biological_process | cellular response to calcium ion                                                                             | GO:0071277 | 16510 | 27    | 1.02886175  | 0.397461 | 0.410810811 | -1 | 1.020548657  | 0.426597   | 0.430630631 | -1        |
| biological_process | internal peptidyl-lysine acetylation                                                                         | GO:0018393 | 16429 | 108   | 1.0143911   | 0.397499 | 0.473873874 | -1 | 1.096573597  | 0.040579   | 0.088288288 | 0.16623   |
| molecular_function | hydrolase activity, acting on ester bonds                                                                    | GO:0016788 | 16202 | 659   | 1.005715337 | 0.397741 | 0.445045045 | -1 | 1.018267475  | 0.203664   | 0.259459459 | 0.378166  |
| biological_process | purine nucleotide biosynthetic process                                                                       | GO:0006164 | 16351 | 186   | 1.010702722 | 0.39968  | 0.403603604 | -1 | 0.988668025  | 0.606137   | 0.623423423 | -1        |
| biological_process | blastocyst development                                                                                       | GO:0001824 | 16479 | 58    | 1.019025398 | 0.400771 | 0.356756757 | -1 | 0.996821497  | 0.516774   | 0.515315315 | -1        |
| biological_process | endosomal transport                                                                                          | GO:0016197 | 16433 | 104   | 1.014095613 | 0.401409 | 0.466666667 | -1 | 1.102137897  | 0.0351638  | 0.095495495 | 0.156532  |
| biological_process | lipoprotein biosynthetic process                                                                             | GO:0042158 | 16478 | 59    | 1.018731686 | 0.401447 | 0.363963964 | -1 | 1.014933538  | 0.421139   | 0.436036036 | -1        |
| biological_process | regulation of lipase activity                                                                                | GO:0060191 | 16482 | 55    | 1.019302182 | 0.401949 | 0.414414414 | -1 | 1.099400073  | 0.100462   | 0.162162162 | 0.262175  |
| biological_process | proteolysis                                                                                                  | GO:0006508 | 15728 | 809   | 1.004915266 | 0.402007 | 0.463063063 | -1 | 1.004738873  | 0.405466   | 0.428828829 | -1        |
| biological_process | regulation of lipid storage                                                                                  | GO:0010883 | 16509 | 28    | 1.02695432  | 0.402374 | 0.396396396 | -1 | 1.271681562  | 0.00634897 | 0.003603604 | 0.0656255 |
| cellular_component | endoplasmic reticulum lumen                                                                                  | GO:0005788 | 16740 | 83    | 1.015625098 | 0.402393 | 0.327927928 | -1 | 1.003635621  | 0.477076   | 0.488288288 | -1        |
| biological_process | regulation of cellular pH                                                                                    | GO:0030641 | 16513 | 24    | 1.028931735 | 0.402985 | 0.432432432 | -1 | 0.824175343  | 0.932294   | 0.956756757 | -1        |
| molecular_function | aminopeptidase activity                                                                                      | GO:0004177 | 16831 | 30    | 1.02586552  | 0.403003 | 0.459459459 | -1 | 1.098719717  | 0.174283   | 0.091891892 | 0.325762  |
| biological_process | response to antibiotic                                                                                       | GO:0046677 | 16498 | 39    | 1.022512543 | 0.403711 | 0.390990991 | -1 | 1.0323175    | 0.363193   | 0.387387387 | -1        |
| biological_process | regulation of epidermal cell differentiation                                                                 | GO:0045604 | 16514 | 23    | 1.029311407 | 0.403768 | 0.365765766 | -1 | 1.198293022  | 0.0496469  | 0.091891892 | 0.183195  |
| molecular_function | endopeptidase regulator activity                                                                             | GO:0061135 | 16737 | 124   | 1.012565644 | 0.403939 | 0.446846847 | -1 | 0.900371137  | 0.973119   | 0.945945946 | -1        |
| biological_process | positive regulation of Ras protein signal transduction                                                       | GO:0046579 | 16511 | 26    | 1.027236721 | 0.404896 | 0.461261261 | -1 | 1.032785732  | 0.386007   | 0.416216216 | -1        |
| biological_process | sulfur compound metabolic process                                                                            | GO:0006790 | 16388 | 149   | 1.011308613 | 0.405112 | 0.403603604 | -1 | 0.977974656  | 0.680031   | 0.682882883 | -1        |
| cellular_component | intrinsic to organelle membrane                                                                              | GO:0031300 | 16626 | 197   | 1.009822141 | 0.405125 | 0.412612613 | -1 | 0.99941882   | 0.505654   | 0.526126126 | -1        |
| cellular_component | secretory granule membrane                                                                                   | GO:0030667 | 16780 | 43    | 1.02109721  | 0.4052   | 0.405405405 | -1 | 1.196455873  | 0.0127346  | 0.028828829 | 0         |
| biological_process | DNA biosynthetic process                                                                                     | GO:0071897 | 16508 | 29    | 1.025537069 | 0.405801 | 0.443243243 | -1 | 0.955178497  | 0.662208   | 0.659459459 | -1        |
| biological_process | protein lipidation                                                                                           | GO:0006497 | 16483 | 54    | 1.018658503 | 0.406009 | 0.358558559 | -1 | 1.0576642    | 0.231136   | 0.241441441 | 0.430574  |
| biological_process | negative regulation of mitosis                                                                               | GO:0045839 | 16513 | 24    | 1.027908835 | 0.40635  | 0.403603604 | -1 | 1.004170497  | 0.485894   | 0.506306306 | -1        |
| biological_process | negative regulation of nuclear division                                                                      | GO:0051784 | 16513 | 24    | 1.027908835 | 0.40635  | 0.403603604 | -1 | 1.004170497  | 0.485894   | 0.506306306 | -1        |
| molecular_function | merase II transcription factor binding transcription factor activity involved in positive regulation of tran | GO:0001190 | 16835 | 26    | 1.026779121 | 0.406456 | 0.396396396 | -1 | 1.258127864  | 0.0112587  | 0.028828829 | 0.0123802 |
| biological_process | phenol-containing compound biosynthetic process                                                              | GO:0046189 | 16512 | 25    | 1.026603957 | 0.408841 | 0.38018018  | -1 | 0.968018686  | 0.609199   | 0.607207207 | -1        |
| biological_process | response to amphetamine                                                                                      | GO:0001975 | 16508 | 29    | 1.024294368 | 0.410306 | 0.47027027  | -1 | 0.995040848  | 0.518484   | 0.486486486 | -1        |
| biological_process | regulation of peptide hormone secretion                                                                      | GO:0090276 | 16431 | 106   | 1.012418444 | 0.412117 | 0.41981982  | -1 | 1.0244035841 | 0.215421   | 0.282882883 | 0.41568   |
| biological_process | negative regulation of actin filament polymerization                                                         | GO:0030837 | 16507 | 30    | 1.023343576 | 0.412308 | 0.363963964 | -1 | 1.052815194  | 0.308021   | 0.326126126 | -1        |
| biological_process | sterol biosynthetic process                                                                                  | GO:0016126 | 16496 | 41    | 1.019922029 | 0.412479 | 0.425225225 | -1 | 0.980406104  | 0.586144   | 0.589189189 | -1        |
| biological_process | positive regulation of cysteine-type endopeptidase activity involved in apoptotic process                    | GO:0043280 | 16448 | 89    | 1.013494928 | 0.412529 | 0.423423423 | -1 | 0.987218278  | 0.582967   | 0.637837838 | -1        |
| molecular_function | GTP binding                                                                                                  | GO:0005525 | 16491 | 370   | 1.006546628 | 0.412748 | 0.441441441 | -1 | 0.994121433  | 0.578501   | 0.609009009 | -1        |
| biological_process | plasma lipoprotein particle organization                                                                     | GO:0071827 | 16514 | 23    | 1.026430023 | 0.41307  | 0.4         | -1 | 0.907488797  | 0.779071   | 0.805405405 | -1        |
| biological_process | icosanoid biosynthetic process                                                                               | GO:0046456 | 16504 | 33    | 1.021800752 | 0.414071 | 0.423423423 | -1 | 1.052184505  | 0.301633   | 0.324324324 | -1        |
| biological_process | fatty acid derivative biosynthetic process                                                                   | GO:1901570 | 16504 | 33    | 1.021800752 | 0.414071 | 0.423423423 | -1 | 1.052184505  | 0.301633   | 0.324324324 | -1        |
| biological_process | internal protein amino acid acetylation                                                                      | GO:0006475 | 16425 | 112   | 1.011512559 | 0.416178 | 0.479279279 | -1 | 1.084713266  | 0.0596005  | 0.104504505 | 0.203854  |
| biological_process | T cell receptor signaling pathway                                                                            | GO:0050852 | 16491 | 46    | 1.017977787 | 0.416273 | 0.354954955 | -1 | 1.073888636  | 0.192055   | 0.115315315 | 0.388595  |
| biological_process | positive regulation of nitric oxide biosynthetic process                                                     | GO:0045429 | 16511 | 26    | 1.023790102 | 0.416744 | 0.414141441 | -1 | 0.859984988  | 0.892074   | 0.807207207 | -1        |
| biological_process | humoral immune response mediated by circulating immunoglobulin                                               | GO:0002455 | 16505 | 32    | 1.021344386 | 0.417111 | 0.414414414 | -1 | 0.725929059  | 0.996407   | 0.931531532 | -1        |
| molecular_function | merase II transcription factor binding transcription factor activity involved in negative regulation of tran | GO:0001191 | 16841 | 20    | 1.026088903 | 0.419887 | 0.410810811 | -1 | 1.271884339  | 0.0175462  | 0.009009009 | 0.029249  |
| cellular_component | multivesicular body                                                                                          | GO:0005771 | 16798 | 25    | 1.023300597 | 0.41999  | 0.410810811 | -1 | 0.868963852  | 0.871961   | 0.810810811 | -1        |
| biological_process | cellular response to unfolded protein                                                                        | GO:0034620 | 16506 | 31    | 1.020870281 | 0.420189 | 0.374774775 | -1 | 1.13526605   | 0.0958329  | 0.104504505 | 0.256091  |
| biological_process | response to tumor necrosis factor                                                                            | GO:0034612 | 16455 | 82    | 1.012640917 | 0.421249 | 0.405405405 | -1 | 1.053913334  | 0.198313   | 0.176576577 | 0.39402   |
| biological_process | regulation of phospholipase activity                                                                         | GO:0010517 | 16508 | 29    | 1.021271018 | 0.421314 | 0.446846847 | -1 | 1.014932408  | 0.444584   | 0.452252252 | -1        |
| biological_process | positive regulation of reactive oxygen species metabolic process                                             | GO:2000379 | 16510 | 27    | 1.021981949 | 0.42154  | 0.409090909 | -1 | 0.913759449  | 0.781382   | 0.76036036  | -1        |
| cellular_component | integral to organelle membrane                                                                               | GO:0031301 | 16649 | 174   | 1.008556644 | 0.422143 | 0.434234234 | -1 | 0.979956637  | 0.677376   | 0.583783784 | -1        |
| molecular_function | serine-type endopeptidase activity                                                                           | GO:0004252 | 16753 | 108   | 1.010828193 | 0.422493 | 0.432432432 | -1 | 0.96839987   | 0.715885   | 0.699099099 | -1        |
| biological_process | regulation of reactive oxygen species metabolic process                                                      | GO:2000377 | 16491 | 46    | 1.016537095 | 0.422897 | 0.461261261 | -1 | 0.97726509   | 0.605461   | 0.578378378 | -1        |
| biological_process | apoptotic cell clearance                                                                                     | GO:0043277 | 16516 | 21    | 1.024460776 | 0.422998 | 0.387387387 | -1 | 1.14206622   | 0.129594   | 0.212612613 | 0.308619  |
| biological_process | ovulation                                                                                                    | GO:0030728 | 16514 | 23    | 1.023364608 | 0.423021 | 0.423423423 | -1 | 0.813654522  | 0.939318   | 0.789189189 | -1        |
| cellular_component | viral genome replication                                                                                     | GO:0019079 | 16501 | 36    | 1.018445749 | 0.423927 | 0.414414414 | -1 | 0.970028475  | 0.622432   | 0.634234234 | -1        |
| cellular_component | cell                                                                                                         | GO:0005623 | 4340  | 12483 | 1.000495781 | 0.424467 | 0.511717172 | -1 | 0.998781608  | 0.679085   | 0.558558559 | -1        |
| cellular_component | cell part                                                                                                    | GO:0044464 | 4340  | 12483 | 1.000495781 | 0.424467 | 0.511717172 | -1 | 0.998781608  | 0.679085   | 0.558558559 | -1        |
| biological_process | protein-lipid complex subunit organization                                                                   | GO:0071825 | 16513 | 24    | 1.022275326 | 0.425005 | 0.416216216 | -1 | 0.943753882  | 0.683559   | 0.704504505 | -1        |
| cellular_component | integral to endoplasmic reticulum membrane                                                                   | GO:0030176 | 16744 | 79    | 1.012019239 | 0.426436 | 0.430630631 | -1 | 1.004910644  | 0.469805   | 0.508108108 | -1        |
| biological_process | detection of abiotic stimulus                                                                                | GO:0009582 | 16471 | 66    | 1.012924928 | 0.427721 | 0.432432432 | -1 | 0.961855963  | 0.704671   | 0.627027027 | -1        |
| biological_process | organic hydroxy compound catabolic process                                                                   | GO:1901616 | 16491 | 46    | 1.01520945  | 0.429502 | 0.401801802 | -1 | 0.911348169  | 0.851512   | 0.8         | -1        |
| biological_process | mRNA export from nucleus                                                                                     | GO:0006406 | 16510 | 27    | 1.019599101 | 0.429954 | 0.414414414 | -1 | 1.050459668  | 0.324745   | 0.381981982 | -1        |
| cellular_component | late endosome                                                                                                | GO:0005770 | 16678 | 145   | 1.008420369 | 0.429976 | 0.410810811 | -1 | 0.956728997  | 0.817637   | 0.767567568 | -1        |
| biological_process | transition metal ion transport                                                                               | GO:0000041 | 16456 | 81    | 1.011048619 | 0.431485 | 0.423423423 | -1 | 0.86185935   | 0.984568   | 0.998198198 | -1        |
| biological_process | regulation of oligodendrocyte differentiation                                                                | GO:0048713 | 16512 | 25    | 1.019880026 | 0.43162  | 0.4         | -1 | 1.072655627  | 0.264459   | 0.21981982  | 0.478604  |
| biological_process | histone H4 acetylation                                                                                       | GO:0043967 | 16492 | 45    | 1.014211715 | 0.434354 | 0.502702703 | -1 | 1.142503886  | 0.0486594  | 0.172972973 | 0.181695  |
| biological_process | gamma-aminobutyric acid signaling pathway                                                                    | GO:0007214 | 16517 | 20    | 1.021039783 | 0.435248 | 0.463063063 | -1 | 1.069812469  | 0.294234   | 0.38018018  | -1        |
| biological_process | fatty acid transport                                                                                         | GO:0015908 | 16487 | 50    | 1.013274611 | 0.435348 | 0.423423423 | -1 | 1.035103199  | 0.333404   | 0.27027027  | -1        |
| biological_process | endoplasmic reticulum unfolded protein response                                                              | GO:0030968 | 16507 | 30    | 1.017139662 | 0.435376 | 0.392792793 | -1 | 1.111387565  | 0.145107   | 0.145945946 | 0.33634   |
| biological_process | regulation of viral genome replication                                                                       | GO:0045069 | 16504 | 33    | 1.016267105 | 0.435665 | 0.425225225 | -1 | 0.983274108  | 0.566174   | 0.569369369 | -1        |
| molecular_function | serine-type peptidase activity                                                                               | GO:0008236 | 16727 | 134   | 1.007977292 | 0.436271 | 0.363063036 | -1 | 0.961873731  | 0.778614   | 0.745945946 | -1        |
| biological_process | positive regulation of cysteine-type endopeptidase activity                                                  | GO:2001056 | 16447 | 90    | 1.009682065 | 0.436651 | 0.45045045  | -1 | 0.986136213  | 0.590371   | 0.636036036 | -1        |
| biological_process | histone acetylation                                                                                          | GO:0016573 | 16431 | 106   | 1.008904512 | 0.436741 | 0.488288288 | -1 | 1.094844097  | 0.0448733  | 0.090909099 | 0.177294  |
| biological_process | embryo implantation                                                                                          | GO:0007566 | 16501 | 36    | 1.015009208 | 0.437976 | 0.423423423 | -1 | 0.927583998  | 0.774414   | 0.704504505 | -1        |
| biological_process | regulation of carbohydrate catabolic process                                                                 | GO:0043470 | 16513 | 24    | 1.018259309 | 0.43841  | 0.428828829 | -1 | 1.115344123  | 0.163687   | 0.30990991  | 0.354436  |
| biological_process | regulation of cellular carbohydrate catabolic process                                                        | GO:0043471 | 16513 | 24    | 1.018259309 | 0.43841  | 0.428828829 | -1 | 1.115344123  | 0.163687   | 0.30990991  | 0.354436  |
| biological_process | ER-associated protein catabolic process                                                                      | GO:0030433 | 16502 | 35    | 1.015106243 | 0.438446 | 0.461261261 | -1 | 1.01412495   | 0.444504   | 0.445045045 | -1        |
| biological_process | response to iron ion                                                                                         | GO:0010039 | 16514 | 23    | 1.018453636 | 0.439062 | 0.41981982  | -1 | 1.066574855  | 0.290008   | 0.25045045  | -1        |
| biological_process | cellular glucose homeostasis                                                                                 | GO:0001678 | 16481 | 56    | 1.01174255  | 0.439433 | 0.461261261 | -1 | 1.040831498  |            |             |           |

|                    |                                                                                                       |            |       |      |             |          |             |    |             |             |              |           |
|--------------------|-------------------------------------------------------------------------------------------------------|------------|-------|------|-------------|----------|-------------|----|-------------|-------------|--------------|-----------|
| biological_process | autophagic vacuole assembly                                                                           | GO:0000045 | 16505 | 32   | 1.014991571 | 0.441573 | 0.448648649 | -1 | 0.92087468  | 0.781152    | 0.859459459  | -1        |
| biological_process | cell activation involved in immune response                                                           | GO:0002263 | 16416 | 121  | 1.007610162 | 0.442205 | 0.488288288 | -1 | 1.01017876  | 0.422869    | 0.452252252  | -1        |
| biological_process | leukocyte activation involved in immune response                                                      | GO:0002366 | 16416 | 121  | 1.007610162 | 0.442205 | 0.488288288 | -1 | 1.01017876  | 0.452252252 | 0.452252252  | -1        |
| biological_process | response to gamma radiation                                                                           | GO:0010332 | 16493 | 44   | 1.012404546 | 0.44328  | 0.437837838 | -1 | 1.029214373 | 0.368417    | 0.376576577  | -1        |
| biological_process | regulation of RNA stability                                                                           | GO:0043487 | 16501 | 36   | 1.013557999 | 0.443933 | 0.446846847 | -1 | 1.072936597 | 0.223994    | 0.21981982   | 0.422903  |
| biological_process | androgen receptor signaling pathway                                                                   | GO:0030521 | 16499 | 38   | 1.013140565 | 0.444166 | 0.434234234 | -1 | 1.078896841 | 0.199523    | 0.252252252  | 0.394631  |
| biological_process | response to ionizing radiation                                                                        | GO:0010212 | 16418 | 119  | 1.007305085 | 0.44494  | 0.455858586 | -1 | 1.021302942 | 0.343157    | 0.369369369  | -1        |
| biological_process | cellular response to metal ion                                                                        | GO:0071248 | 16464 | 73   | 1.009336768 | 0.444954 | 0.463063063 | -1 | 1.118906292 | 0.0389051   | 0.068468468  | 0.16392   |
| biological_process | regulation of G1/S transition of mitotic cell cycle                                                   | GO:2000045 | 16489 | 48   | 1.011431577 | 0.445386 | 0.423423423 | -1 | 1.050395002 | 0.272397    | 0.198198198  | 0.489145  |
| biological_process | regulation of mitotic metaphase/anaphase transition                                                   | GO:0030071 | 16510 | 27   | 1.015173812 | 0.445662 | 0.457657658 | -1 | 1.080643901 | 0.23381     | 0.198198198  | 0.433139  |
| biological_process | regulation of metaphase/anaphase transition of cell cycle                                             | GO:1902099 | 16510 | 27   | 1.015173812 | 0.445662 | 0.457657658 | -1 | 1.080643901 | 0.23381     | 0.198198198  | 0.433139  |
| biological_process | male gamete generation                                                                                | GO:0048232 | 16223 | 314  | 1.004333829 | 0.446621 | 0.477477477 | -1 | 1.053088721 | 0.0499807   | 0.104504505  | 0.183255  |
| biological_process | regulation of interleukin-1 beta production                                                           | GO:0032651 | 16509 | 28   | 1.01439446  | 0.447495 | 0.468468468 | -1 | 1.02765401  | 0.399893    | 0.401801802  | -1        |
| biological_process | leukocyte apoptotic process                                                                           | GO:0071887 | 16482 | 55   | 1.010236529 | 0.447628 | 0.482882883 | -1 | 1.04765571  | 0.269896    | 0.273873874  | 0.485923  |
| biological_process | regulation of insulin secretion                                                                       | GO:0050796 | 16446 | 91   | 1.007866681 | 0.448174 | 0.437837838 | -1 | 1.049449375 | 0.206322    | 0.264864865  | 0.403824  |
| biological_process | ribose phosphate biosynthetic process                                                                 | GO:0046390 | 16344 | 193  | 1.005293706 | 0.449033 | 0.434234234 | -1 | 0.976770825 | 0.713085    | 0.726126126  | -1        |
| biological_process | intrinsic apoptotic signaling pathway                                                                 | GO:0097193 | 16434 | 103  | 1.007188906 | 0.449589 | 0.473873874 | -1 | 1.056284591 | 0.16049     | 0.142342342  | 0.351096  |
| biological_process | spermatogenesis                                                                                       | GO:0007283 | 16224 | 313  | 1.003918406 | 0.451779 | 0.482882883 | -1 | 1.054764782 | 0.0451138   | 0.095495495  | 0.177602  |
| biological_process | regulation of mitotic cell cycle phase transition                                                     | GO:1901990 | 16434 | 103  | 1.006692255 | 0.453057 | 0.481081081 | -1 | 1.083801187 | 0.069748    | 0.073873874  | 0.221009  |
| cellular_component | Golgi-associated vesicle                                                                              | GO:0005798 | 16771 | 52   | 1.009311874 | 0.453641 | 0.457657658 | -1 | 1.068805669 | 0.194697    | 0.214414414  | 0.325368  |
| cellular_component | intrinsic to endoplasmic reticulum membrane                                                           | GO:0031227 | 16724 | 99   | 1.006674508 | 0.454084 | 0.455858586 | -1 | 1.048586758 | 0.200508    | 0.322525253  | 0.332349  |
| biological_process | DNA-dependent transcription, elongation                                                               | GO:0006354 | 16502 | 35   | 1.011167249 | 0.45442  | 0.475657656 | -1 | 1.137083739 | 0.0798349   | 0.084684685  | 0.236369  |
| cellular_component | signalosome                                                                                           | GO:0008180 | 16792 | 31   | 1.011708089 | 0.455018 | 0.497297297 | -1 | 1.006665367 | 0.474359    | 0.486468468  | -1        |
| biological_process | detection of external stimulus                                                                        | GO:0009581 | 16458 | 79   | 1.007188936 | 0.455857 | 0.446846847 | -1 | 0.946954615 | 0.793511    | 0.722525253  | -1        |
| molecular_function | modified amino acid binding                                                                           | GO:0072341 | 16813 | 48   | 1.00913855  | 0.456284 | 0.410810811 | -1 | 0.902404405 | 0.879577    | 0.8          | -1        |
| biological_process | xenobiotic metabolic process                                                                          | GO:0006805 | 16511 | 26   | 1.012306022 | 0.456711 | 0.428828829 | -1 | 1.020836521 | 0.426958    | 0.367567568  | -1        |
| biological_process | cellular response to xenobiotic stimulus                                                              | GO:0071466 | 16511 | 26   | 1.012306022 | 0.456711 | 0.428828829 | -1 | 1.020836521 | 0.426958    | 0.367567568  | -1        |
| biological_process | catecholamine metabolic process                                                                       | GO:0006584 | 16496 | 41   | 1.009592495 | 0.457606 | 0.472072072 | -1 | 1.199756798 | 0.0132717   | 0.018018018  | 0.0982678 |
| biological_process | catechol-containing compound metabolic process                                                        | GO:0009712 | 16496 | 41   | 1.009592495 | 0.457606 | 0.472072072 | -1 | 1.199756798 | 0.0132717   | 0.018018018  | 0.0982678 |
| biological_process | phospholipid catabolic process                                                                        | GO:0009395 | 16511 | 26   | 1.011794379 | 0.458505 | 0.434234234 | -1 | 0.708915155 | 0.994958    | 0.972972973  | -1        |
| molecular_function | hydrolase activity, acting on carbon-nitrogen (but not peptide) bonds, in linear amides               | GO:0016811 | 16811 | 50   | 1.008464647 | 0.458662 | 0.443234243 | -1 | 0.87793675  | 0.932836    | 0.918918919  | -1        |
| molecular_function | endonuclease activity                                                                                 | GO:0004521 | 16828 | 33   | 1.010420346 | 0.458679 | 0.484848485 | -1 | 0.71512436  | 0.99498     | 0.92972973   | -1        |
| cellular_component | photoreceptor outer segment                                                                           | GO:0001750 | 16783 | 40   | 1.009397832 | 0.458961 | 0.484848485 | -1 | 1.153804709 | 0.0458132   | 0.0909090909 | 0.0412893 |
| biological_process | developmental pigmentation                                                                            | GO:0048066 | 16501 | 36   | 1.009839279 | 0.459253 | 0.47027027  | -1 | 0.979790537 | 0.583287    | 0.58018018   | -1        |
| molecular_function | oxidoreductase activity, acting on paired donors, with incorporation or reduction of molecular oxygen | GO:0016705 | 16695 | 166  | 1.004540687 | 0.459459 | 0.466666667 | -1 | 0.979825513 | 0.67455     | 0.704504505  | -1        |
| molecular_function | enzyme inhibitor activity                                                                             | GO:0004857 | 16628 | 233  | 1.003796668 | 0.459736 | 0.452252252 | -1 | 1.003150167 | 0.466606    | 0.488288288  | -1        |
| molecular_function | kinase regulator activity                                                                             | GO:0019207 | 16738 | 123  | 1.005214657 | 0.459988 | 0.457657658 | -1 | 1.030248111 | 0.279907    | 0.286486486  | 0.483629  |
| biological_process | ER-nucleus signaling pathway                                                                          | GO:0006984 | 16494 | 43   | 1.008693687 | 0.460641 | 0.394594595 | -1 | 1.089477604 | 0.154442    | 0.142342342  | 0.34489   |
| biological_process | complement activation                                                                                 | GO:0006956 | 16504 | 33   | 1.009733003 | 0.461407 | 0.437837838 | -1 | 0.690166719 | 0.998986    | 0.974774775  | -1        |
| biological_process | sensory perception of smell                                                                           | GO:0007608 | 16487 | 50   | 1.007897885 | 0.461434 | 0.473873874 | -1 | 1.040464277 | 0.480142    | 0.493693694  | -1        |
| biological_process | activation of cysteine-type endopeptidase activity involved in apoptotic process                      | GO:0006919 | 16472 | 65   | 1.006905854 | 0.461535 | 0.490990909 | -1 | 0.954591662 | 0.737422    | 0.789189189  | -1        |
| biological_process | activation of cysteine-type endopeptidase activity                                                    | GO:0097202 | 16472 | 65   | 1.006905854 | 0.461535 | 0.490990909 | -1 | 0.954591662 | 0.737422    | 0.789189189  | -1        |
| biological_process | cell-cell recognition                                                                                 | GO:0009988 | 16517 | 20   | 1.012459516 | 0.461553 | 0.490090909 | -1 | 0.963463102 | 0.611504    | 0.592792793  | -1        |
| biological_process | immunoglobulin production involved in immunoglobulin mediated immune response                         | GO:0002381 | 16503 | 34   | 1.009535758 | 0.461619 | 0.472072072 | -1 | 0.964633672 | 0.639683    | 0.632423432  | -1        |
| biological_process | monocarboxylic acid metabolic process                                                                 | GO:0032787 | 16210 | 327  | 1.00299042  | 0.462344 | 0.455858586 | -1 | 0.975885669 | 0.777724    | 0.783783784  | -1        |
| molecular_function | histone acetyltransferase activity                                                                    | GO:0004402 | 16814 | 47   | 1.00793489  | 0.462422 | 0.520720721 | -1 | 1.154188551 | 0.033366    | 0.140540541  | 0.0513133 |
| biological_process | positive regulation of gliogenesis                                                                    | GO:0014015 | 16502 | 35   | 1.009128647 | 0.462717 | 0.468468468 | -1 | 1.035585553 | 0.35756     | 0.322525253  | -1        |
| biological_process | regulation of activin receptor signaling pathway                                                      | GO:0032925 | 16515 | 22   | 1.011431577 | 0.462997 | 0.472072072 | -1 | 1.139016955 | 0.129214    | 0.127927928  | 0.308598  |
| molecular_function | peptidase inhibitor activity                                                                          | GO:0030414 | 16734 | 127  | 1.004719823 | 0.463138 | 0.463063063 | -1 | 0.923299216 | 0.933564    | 0.915315315  | -1        |
| biological_process | vacuolar transport                                                                                    | GO:0007034 | 16498 | 39   | 1.008394272 | 0.463804 | 0.490090909 | -1 | 1.087013781 | 0.173024    | 0.210810811  | 0.366342  |
| biological_process | regulation of T cell receptor signaling pathway                                                       | GO:0050856 | 16516 | 21   | 1.011376868 | 0.46402  | 0.486486486 | -1 | 1.053934122 | 0.334208    | 0.347747748  | -1        |
| biological_process | organelle assembly                                                                                    | GO:0070925 | 16296 | 241  | 1.003310682 | 0.464283 | 0.466666667 | -1 | 0.982084506 | 0.686273    | 0.632423432  | -1        |
| molecular_function | polyubiquitin binding                                                                                 | GO:0031593 | 16832 | 29   | 1.009563058 | 0.464441 | 0.477477477 | -1 | 0.971366558 | 0.605395    | 0.672072072  | -1        |
| biological_process | response to axon injury                                                                               | GO:0048678 | 16475 | 62   | 1.00642842  | 0.465026 | 0.457657658 | -1 | 1.001403807 | 0.492371    | 0.468468468  | -1        |
| cellular_component | sarcoplasmic reticulum membrane                                                                       | GO:0033017 | 16801 | 22   | 1.01067793  | 0.465423 | 0.45045045  | -1 | 1.284772445 | 0.0103049   | 0.01981982   | 0         |
| biological_process | unsaturated fatty acid metabolic process                                                              | GO:0033559 | 16491 | 46   | 1.007180483 | 0.466362 | 0.445045045 | -1 | 1.07736953  | 0.181379    | 0.209009009  | 0.377091  |
| biological_process | regulation of cell cycle phase transition                                                             | GO:1901987 | 16372 | 165  | 1.003700962 | 0.467042 | 0.477477477 | -1 | 1.065311342 | 0.0720929   | 0.079279279  | 0.224637  |
| biological_process | response to activity                                                                                  | GO:0014823 | 16497 | 40   | 1.007467964 | 0.467381 | 0.446846847 | -1 | 0.923071144 | 0.800612    | 0.8          | -1        |
| biological_process | response to increased oxygen levels                                                                   | GO:0036296 | 16509 | 28   | 1.008922196 | 0.467405 | 0.463063063 | -1 | 1.114907897 | 0.145937    | 0.10990991   | 0.336767  |
| biological_process | response to hyperoxia                                                                                 | GO:0055093 | 16509 | 28   | 1.008922196 | 0.467405 | 0.463063063 | -1 | 1.114907897 | 0.145937    | 0.10990991   | 0.336767  |
| biological_process | negative regulation of endothelial cell migration                                                     | GO:0010596 | 16515 | 22   | 1.010024344 | 0.467544 | 0.423423423 | -1 | 0.983336408 | 0.553908    | 0.558585859  | -1        |
| biological_process | regulation of nitric oxide biosynthetic process                                                       | GO:0045428 | 16500 | 37   | 1.007426279 | 0.469559 | 0.491891892 | -1 | 0.893404887 | 0.869576    | 0.771171171  | -1        |
| biological_process | endosome to lysosome transport                                                                        | GO:0008333 | 16512 | 25   | 1.008333247 | 0.471231 | 0.486486486 | -1 | 1.100349515 | 0.192327    | 0.061261261  | 0.388318  |
| cellular_component | gap junction                                                                                          | GO:0005921 | 16800 | 23   | 1.008673452 | 0.471272 | 0.452252252 | -1 | 0.805578385 | 0.946971    | 0.886486486  | -1        |
| biological_process | positive regulation of endopeptidase activity                                                         | GO:0010950 | 16441 | 96   | 1.00410877  | 0.47215  | 0.491891892 | -1 | 0.961667232 | 0.742964    | 0.771171171  | -1        |
| biological_process | protein metabolic process                                                                             | GO:0019538 | 12935 | 3602 | 1.000572797 | 0.473269 | 0.452252252 | -1 | 1.005803646 | 0.247716    | 0.304504505  | 0.456149  |
| cellular_component | protein complex                                                                                       | GO:0043234 | 13821 | 3002 | 1.00061338  | 0.474373 | 0.513513514 | -1 | 1.015898807 | 0.0479824   | 0.113513514  | 0.0471448 |
| biological_process | type 2 immune response                                                                                | GO:0042092 | 16515 | 22   | 1.007737592 | 0.474941 | 0.508108108 | -1 | 0.947952216 | 0.663918    | 0.666666667  | -1        |
| biological_process | cellular response to ketone                                                                           | GO:1901655 | 16515 | 22   | 1.00731982  | 0.476293 | 0.479279279 | -1 | 1.03105868  | 0.400356    | 0.441441441  | -1        |
| molecular_function | chloride transmembrane transporter activity                                                           | GO:0015108 | 16786 | 75   | 1.003903699 | 0.476609 | 0.473873874 | -1 | 0.93055055  | 0.722525253 | 0.722525253  | -1        |
| biological_process | negative regulation of peptidyl-tyrosine phosphorylation                                              | GO:0050732 | 16509 | 28   | 1.006369624 | 0.476723 | 0.463063063 | -1 | 1.051503924 | 0.318319    | 0.288288288  | -1        |
| biological_process | positive regulation of small GTPase mediated signal transduction                                      | GO:0051057 | 16508 | 29   | 1.005974951 | 0.477778 | 0.508108108 | -1 | 1.031975762 | 0.382672    | 0.437837838  | -1        |
| biological_process | histone H3-K4 methylation                                                                             | GO:0051568 | 16507 | 30   | 1.005703336 | 0.478425 | 0.491891892 | -1 | 1.298597441 | 0.00228883  | 0.009090909  | 0.0509701 |
| cellular_component | chloride channel complex                                                                              | GO:0034707 | 16776 | 47   | 1.004515366 | 0.478598 | 0.473873874 | -1 | 0.920984702 | 0.826293    | 0.765765766  | -1        |
| biological_process | sterol homeostasis                                                                                    | GO:0055092 | 16492 | 45   | 1.004534307 | 0.478984 | 0.427027027 | -1 | 1.073942365 | 0.194819    | 0.281081081  | 0.392177  |
| molecular_function | carbon-carbon lyase activity                                                                          | GO:0016830 | 16815 | 46   | 1.004425308 | 0.47925  | 0.464864865 | -1 | 0.917569291 | 0.833906    | 0.796396396  | -1        |
| biological_process | tetrapyrrole biosynthetic process                                                                     | GO:0033014 | 16503 | 34   | 1.005082541 | 0.47953  | 0.490090909 | -1 | 1.049308819 | 0.309077    | 0.327927928  | -1        |
| biological_process | organic cation transport                                                                              |            |       |      |             |          |             |    |             |             |              |           |

|                    |                                                                                              |            |       |      |             |          |             |    |             |             |             |           |
|--------------------|----------------------------------------------------------------------------------------------|------------|-------|------|-------------|----------|-------------|----|-------------|-------------|-------------|-----------|
| biological_process | keratinocyte proliferation                                                                   | GO:0043616 | 16516 | 21   | 1.004241762 | 0.486582 | 0.52972973  | -1 | 1.308529002 | 0.00713396  | 0.104504505 | 0.0738603 |
| biological_process | endoplasmic reticulum organization                                                           | GO:0007029 | 16516 | 21   | 1.004212968 | 0.486673 | 0.488288288 | -1 | 1.208591442 | 0.048791    | 0.05045045  | 0.181615  |
| molecular_function | histone binding                                                                              | GO:0042393 | 16771 | 90   | 1.002003831 | 0.48684  | 0.51717117  | -1 | 1.152554145 | 0.00597718  | 0.102702703 | 0         |
| biological_process | negative regulation of I-kappaB kinase/NF-kappaB cascade                                     | GO:0043124 | 16514 | 23   | 1.003820621 | 0.487352 | 0.484684685 | -1 | 1.008421371 | 0.472115    | 0.461261261 | -1        |
| biological_process | cellular macromolecular complex assembly                                                     | GO:0034622 | 16079 | 458  | 1.000776445 | 0.488405 | 0.51171712  | -1 | 0.968031846 | 0.885301    | 0.742342342 | -1        |
| biological_process | detection of mechanical stimulus                                                             | GO:0050982 | 16509 | 28   | 1.002888453 | 0.489451 | 0.520720721 | -1 | 1.068106436 | 0.266083    | 0.326126126 | 0.480415  |
| biological_process | negative regulation of binding                                                               | GO:0051100 | 16472 | 65   | 1.001863836 | 0.489621 | 0.508108108 | -1 | 1.046001028 | 0.25992     | 0.243243243 | 0.472368  |
| molecular_function | N-methyltransferase activity                                                                 | GO:0008170 | 16798 | 63   | 1.001823092 | 0.489992 | 0.506306306 | -1 | 1.121011048 | 0.0477801   | 0.034234234 | 0.0803319 |
| biological_process | viral genome expression                                                                      | GO:0019080 | 16513 | 24   | 1.002941001 | 0.490058 | 0.488288288 | -1 | 1.127583652 | 0.139327    | 0.113513514 | 0.326564  |
| biological_process | viral transcription                                                                          | GO:0019083 | 16513 | 24   | 1.002941001 | 0.490058 | 0.488288288 | -1 | 1.127583652 | 0.139327    | 0.113513514 | 0.326564  |
| biological_process | lymphocyte activation involved in immune response                                            | GO:0002285 | 16461 | 76   | 1.001483163 | 0.49107  | 0.524324324 | -1 | 1.063772133 | 0.167242    | 0.232423242 | 0.358315  |
| biological_process | organophosphate biosynthetic process                                                         | GO:0090407 | 16130 | 407  | 1.000608577 | 0.491463 | 0.475675676 | -1 | 0.983538162 | 0.71991     | 0.754954955 | -1        |
| biological_process | alpha-beta T cell activation involved in immune response                                     | GO:0002287 | 16507 | 30   | 1.000235004 | 0.492312 | 0.545945946 | -1 | 1.142592571 | 0.0878735   | 0.171171171 | 0.2477    |
| biological_process | nuclear-transcribed mRNA catabolic process                                                   | GO:0000956 | 16482 | 55   | 1.001049942 | 0.494633 | 0.520720721 | -1 | 1.066774277 | 0.195135    | 0.075675676 | 0.392166  |
| biological_process | ubiquitin-dependent protein catabolic process                                                | GO:0006511 | 16221 | 316  | 1.000430409 | 0.494696 | 0.50990991  | -1 | 1.092634936 | 0.00198973  | 0.086486486 | 0.0507538 |
| cellular_component | mediator complex                                                                             | GO:0016592 | 16788 | 35   | 1.001274228 | 0.494795 | 0.533333333 | -1 | 0.950812276 | 0.693076    | 0.664864865 | -1        |
| biological_process | icosanoid transport                                                                          | GO:0071715 | 16512 | 25   | 1.001502894 | 0.494823 | 0.464864865 | -1 | 0.910468611 | 0.781132    | 0.767567568 | -1        |
| biological_process | fatty acid derivative transport                                                              | GO:1901571 | 16512 | 25   | 1.001502894 | 0.494823 | 0.464864865 | -1 | 0.910468611 | 0.781132    | 0.767567568 | -1        |
| biological_process | positive regulation of lipid transport                                                       | GO:0032370 | 16507 | 30   | 1.001329701 | 0.494907 | 0.520720721 | -1 | 1.183504545 | 0.0407145   | 0.036036036 | 0.166789  |
| biological_process | cellular response to topologically incorrect protein                                         | GO:0035967 | 16501 | 36   | 1.001172342 | 0.495155 | 0.479279279 | -1 | 1.093626391 | 0.165021    | 0.183783784 | 0.355053  |
| biological_process | glutamine metabolic process                                                                  | GO:0006541 | 16517 | 20   | 1.000317741 | 0.499037 | 0.511711712 | -1 | 1.080587689 | 0.266125    | 0.351351351 | 0.480458  |
| biological_process | cellular response to interferon-gamma                                                        | GO:0071346 | 16500 | 37   | 1.000189617 | 0.499223 | 0.506306306 | -1 | 1.070272508 | 0.229297    | 0.254054054 | 0.427886  |
| molecular_function | chromatin DNA binding                                                                        | GO:0031490 | 16829 | 32   | 1.000182262 | 0.499297 | 0.520720721 | -1 | 0.982513083 | 0.568096    | 0.558585859 | -1        |
| biological_process | regulation of interleukin-2 production                                                       | GO:0032663 | 16500 | 37   | 1.000120978 | 0.499512 | 0.479279279 | -1 | 1.004824331 | 0.479729    | 0.511711712 | -1        |
| biological_process | chloride transport                                                                           | GO:0006821 | 16491 | 46   | 1.000074296 | 0.499673 | 0.493693694 | -1 | 0.876022293 | 0.927653    | 0.895495495 | -1        |
| biological_process | negative regulation of protein secretion                                                     | GO:0050709 | 16499 | 38   | 0.999630963 | 0.501595 | 0.475675676 | -1 | 0.908379889 | 0.836319    | 0.807207207 | -1        |
| biological_process | interleukin-12 production                                                                    | GO:0032615 | 16503 | 34   | 0.999462667 | 0.502188 | 0.493693694 | -1 | 1.109000423 | 0.135239    | 0.187387387 | 0.318539  |
| biological_process | body fluid secretion                                                                         | GO:0007589 | 16466 | 71   | 0.999606445 | 0.502321 | 0.481081081 | -1 | 1.237294573 | 0.00025956  | 0.001801802 | 0.0145904 |
| biological_process | iron ion transport                                                                           | GO:0006826 | 16499 | 38   | 0.999408919 | 0.502545 | 0.500900901 | -1 | 0.789695989 | 0.987716    | 0.989189189 | -1        |
| cellular_component | chromatin                                                                                    | GO:0000785 | 16521 | 302  | 0.999652563 | 0.504238 | 0.50990991  | -1 | 1.02194413  | 0.25255     | 0.331531532 | 0.417948  |
| biological_process | labyrinthine layer development                                                               | GO:0060711 | 16500 | 37   | 0.998820121 | 0.504986 | 0.488288288 | -1 | 1.098502428 | 0.14942     | 0.201801802 | 0.340479  |
| cellular_component | filamentous actin                                                                            | GO:0031941 | 16803 | 20   | 0.998377854 | 0.505027 | 0.482882883 | -1 | 1.255516604 | 0.0238275   | 0.032432432 | 0.0158979 |
| molecular_function | pyridoxal phosphate binding                                                                  | GO:0030170 | 16809 | 52   | 0.998960522 | 0.505196 | 0.506306306 | -1 | 0.892831972 | 0.9090984   | 0.90909091  | -1        |
| molecular_function | monooxygenase activity                                                                       | GO:0004497 | 16764 | 97   | 0.999079884 | 0.506288 | 0.511711712 | -1 | 0.983521191 | 0.611009    | 0.607207207 | -1        |
| biological_process | limbic system development                                                                    | GO:0021761 | 16464 | 73   | 0.998658129 | 0.507964 | 0.493693694 | -1 | 0.984881592 | 0.588736    | 0.609009009 | -1        |
| molecular_function | carbohydrate derivative transporter activity                                                 | GO:1901505 | 16836 | 25   | 0.997652163 | 0.508128 | 0.547747748 | -1 | 1.11516143  | 0.159123    | 0.156756757 | 0.30555   |
| biological_process | amide biosynthetic process                                                                   | GO:0043604 | 16495 | 42   | 0.998114439 | 0.508475 | 0.515315315 | -1 | 0.965470895 | 0.651046    | 0.632423242 | -1        |
| biological_process | cellular senescence                                                                          | GO:0090398 | 16509 | 28   | 0.997610547 | 0.508764 | 0.522522523 | -1 | 0.996500546 | 0.512824    | 0.527927928 | -1        |
| biological_process | mitotic cell cycle                                                                           | GO:0000278 | 16207 | 330  | 0.999164104 | 0.510665 | 0.499099099 | -1 | 1.098920002 | 0.000833497 | 0.012612613 | 0.0344462 |
| biological_process | regulation of cellular amine metabolic process                                               | GO:0033238 | 16513 | 24   | 0.996148541 | 0.513065 | 0.518918919 | -1 | 1.073979653 | 0.264949    | 0.266666667 | 0.478933  |
| biological_process | negative regulation of B cell activation                                                     | GO:0050869 | 16512 | 25   | 0.995915743 | 0.514139 | 0.500900901 | -1 | 0.797201819 | 0.960602    | 0.978378378 | -1        |
| cellular_component | SAGA-type complex                                                                            | GO:0070461 | 16798 | 25   | 0.995892118 | 0.514211 | 0.490090909 | -1 | 1.050694811 | 0.330206    | 0.205405405 | -1        |
| biological_process | modification of morphology or physiology of other organism involved in symbiotic interaction | GO:0051817 | 16497 | 40   | 0.9964539   | 0.515334 | 0.515315315 | -1 | 1.021311885 | 0.40761     | 0.432423242 | -1        |
| biological_process | regulation of intracellular pH                                                               | GO:0051453 | 16515 | 22   | 0.995078    | 0.515979 | 0.499099099 | -1 | 0.768398196 | 0.970143    | 0.987387387 | -1        |
| biological_process | DNA damage checkpoint                                                                        | GO:0000077 | 16463 | 74   | 0.997279029 | 0.516231 | 0.535135135 | -1 | 1.09216801  | 0.0843594   | 0.169369369 | 0.244004  |
| molecular_function | transition metal ion binding                                                                 | GO:0046914 | 14872 | 1989 | 0.998448499 | 0.51816  | 0.524324324 | -1 | 1.048693401 | 3.10E-05    | 0.221621622 | 0         |
| biological_process | RNA polyadenylation                                                                          | GO:0043631 | 16514 | 23   | 0.994350962 | 0.518746 | 0.52972973  | -1 | 1.162549136 | 0.0883219   | 0.144144144 | 0.247909  |
| biological_process | negative regulation of protein ubiquitination                                                | GO:0031397 | 16501 | 36   | 0.995330557 | 0.519394 | 0.578378378 | -1 | 1.143249645 | 0.068072    | 0.043243243 | 0.218411  |
| biological_process | intracellular estrogen receptor signaling pathway                                            | GO:0030520 | 16512 | 25   | 0.994063034 | 0.520539 | 0.531531532 | -1 | 1.364198497 | 0.000798447 | 0.014414414 | 0.0327448 |
| biological_process | natural killer cell mediated immunity                                                        | GO:0002228 | 16513 | 24   | 0.99354846  | 0.521865 | 0.52972973  | -1 | 0.928556509 | 0.727983    | 0.742342342 | -1        |
| biological_process | natural killer cell mediated cytotoxicity                                                    | GO:0042267 | 16513 | 24   | 0.99354846  | 0.521865 | 0.52972973  | -1 | 0.928556509 | 0.727983    | 0.742342342 | -1        |
| biological_process | regulation of viral transcription                                                            | GO:0046782 | 16514 | 23   | 0.993336168 | 0.522107 | 0.536936937 | -1 | 1.110847218 | 0.178425    | 0.171171171 | 0.372773  |
| biological_process | cellular biogenic amine metabolic process                                                    | GO:0006576 | 16461 | 76   | 0.99633392  | 0.522149 | 0.499099099 | -1 | 0.978039469 | 0.630219    | 0.598198198 | -1        |
| biological_process | photoreceptor cell differentiation                                                           | GO:0046530 | 16493 | 44   | 0.995105485 | 0.522474 | 0.545945946 | -1 | 1.112342761 | 0.0981056   | 0.156756757 | 0.260607  |
| biological_process | eye photoreceptor cell differentiation                                                       | GO:0001754 | 16502 | 35   | 0.994253764 | 0.523523 | 0.545945955 | -1 | 1.100426913 | 0.151473    | 0.246846847 | 0.342192  |
| biological_process | regulation of circadian rhythm                                                               | GO:0042752 | 16506 | 31   | 0.993523591 | 0.524944 | 0.490090909 | -1 | 0.928894116 | 0.75378     | 0.641441441 | -1        |
| molecular_function | ribonuclease activity                                                                        | GO:0004540 | 16815 | 46   | 0.994639985 | 0.525147 | 0.544144144 | -1 | 0.779520181 | 0.995252    | 0.958558559 | -1        |
| molecular_function | ATPase activity                                                                              | GO:0016887 | 16505 | 356  | 0.998049573 | 0.525682 | 0.511711712 | -1 | 1.082122717 | 0.00333787  | 0.124324324 | 0         |
| biological_process | G2 DNA damage checkpoint                                                                     | GO:0031572 | 16508 | 29   | 0.992909908 | 0.526408 | 0.556756757 | -1 | 1.128093278 | 0.115886    | 0.185585586 | 0.285037  |
| biological_process | response to unfolded protein                                                                 | GO:0006986 | 16481 | 56   | 0.99489817  | 0.52643  | 0.490090909 | -1 | 1.145266652 | 0.0296424   | 0.036036036 | 0.143226  |
| biological_process | response to salt stress                                                                      | GO:0009651 | 16516 | 21   | 0.99154945  | 0.526776 | 0.493693694 | -1 | 0.81762907  | 0.926266    | 0.926126126 | -1        |
| molecular_function | phospholipase C activity                                                                     | GO:0004629 | 16837 | 24   | 0.992029062 | 0.526993 | 0.542342342 | -1 | 1.114073777 | 0.166363    | 0.308108108 | 0.318741  |
| biological_process | mRNA 3'-end processing                                                                       | GO:0031124 | 16506 | 31   | 0.992712162 | 0.528062 | 0.544144144 | -1 | 1.162039279 | 0.0588961   | 0.126126126 | 0.203025  |
| biological_process | microtubule anchoring                                                                        | GO:0034453 | 16505 | 32   | 0.992728376 | 0.528448 | 0.513513514 | -1 | 1.152784536 | 0.0670125   | 0.043243243 | 0.218972  |
| molecular_function | neuropeptide receptor activity                                                               | GO:0008188 | 16828 | 33   | 0.992190353 | 0.531009 | 0.511711712 | -1 | 0.977870896 | 0.587238    | 0.545945946 | -1        |
| biological_process | organonitrogen compound biosynthetic process                                                 | GO:1901566 | 16034 | 503  | 0.997998886 | 0.531501 | 0.486486486 | -1 | 0.975095956 | 0.837107    | 0.688288288 | -1        |
| molecular_function | amino acid binding                                                                           | GO:0016597 | 16766 | 95   | 0.995196312 | 0.532418 | 0.50990991  | -1 | 0.924885572 | 0.898264    | 0.864864865 | -1        |
| biological_process | neuroepithelial cell differentiation                                                         | GO:0060563 | 16503 | 34   | 0.991929189 | 0.532537 | 0.540540541 | -1 | 0.97315952  | 0.606963    | 0.58018018  | -1        |
| molecular_function | structure-specific DNA binding                                                               | GO:0043566 | 16663 | 198  | 0.996467501 | 0.5345   | 0.527927928 | -1 | 1.0057006   | 0.0860415   | 0.147747748 | 0.156048  |
| biological_process | response to xenobiotic stimulus                                                              | GO:0009410 | 16507 | 30   | 0.990336654 | 0.536576 | 0.520720721 | -1 | 1.004699583 | 0.482223    | 0.464864865 | -1        |
| biological_process | chaperone-mediated protein folding                                                           | GO:0061077 | 16512 | 25   | 0.988916083 | 0.538285 | 0.535135135 | -1 | 0.922861928 | 0.748127    | 0.765756756 | -1        |
| biological_process | modification-dependent protein catabolic process                                             | GO:0019941 | 16215 | 322  | 0.996913111 | 0.538657 | 0.522522523 | -1 | 1.091155256 | 0.00211109  | 0.086486486 | 0.0503586 |
| cellular_component | microtubule organizing center part                                                           | GO:0044450 | 16735 | 88   | 0.993999907 | 0.538942 | 0.536936937 | -1 | 1.027093881 | 0.329472    | 0.338738739 | -1        |
| biological_process | cellular component maintenance                                                               | GO:0043954 | 16503 | 34   | 0.989997802 | 0.540294 | 0.545945946 | -1 | 1.129363576 | 0.0954643   | 0.054054054 | 0.256091  |
| cellular_component | photoreceptor inner segment                                                                  | GO:0001917 | 16799 | 24   | 0.987874996 | 0.541013 | 0.538738739 | -1 | 0.947897363 | 0.670922    | 0.70990991  | -1        |
| molecular_function | peptidase regulator activity                                                                 | GO:0061134 | 16705 | 156  | 0.995130028 | 0.542144 | 0.520720721 | -1 | 0.920223272 | 0.958541    | 0.922522523 | -1        |
| biological_process | positive regulation of peptide secretion                                                     | GO:0002793 | 16486 | 51   | 0.991452567 | 0.542188 | 0.545945946 | -1 | 1.03553657  | 0.329897    | 0.342342342 | -1        |
| biological_process | negative regulation of transcription factor import into nucleus                              | GO:0042992 | 165   |      |             |          |             |    |             |             |             |           |

|                    |                                                                              |            |       |     |             |          |             |    |              |             |             |           |
|--------------------|------------------------------------------------------------------------------|------------|-------|-----|-------------|----------|-------------|----|--------------|-------------|-------------|-----------|
| molecular_function | heat shock protein binding                                                   | GO:0031072 | 16769 | 92  | 0.993018123 | 0.546306 | 0.54954955  | -1 | 0.996711792  | 0.521851    | 0.511711712 | -1        |
| biological_process | response to amine stimulus                                                   | GO:0014075 | 16496 | 41  | 0.988797745 | 0.54952  | 0.538738739 | -1 | 0.956546709  | 0.685305    | 0.72972973  | -1        |
| cellular_component | rough endoplasmic reticulum                                                  | GO:0005791 | 16780 | 43  | 0.988983601 | 0.54986  | 0.551351351 | -1 | 0.948554071  | 0.72076     | 0.630630631 | -1        |
| molecular_function | cyclic nucleotide binding                                                    | GO:0030551 | 16832 | 29  | 0.986200984 | 0.551261 | 0.554954955 | -1 | 0.99950984   | 0.501836    | 0.477477477 | -1        |
| biological_process | protein homotetramerization                                                  | GO:0051289 | 16481 | 56  | 0.990067288 | 0.55133  | 0.54954955  | -1 | 0.95446518   | 0.722831    | 0.679279279 | -1        |
| biological_process | positive regulation of calcium ion transport                                 | GO:0051928 | 16494 | 43  | 0.98839646  | 0.552516 | 0.569369369 | -1 | 0.107840511  | 0.186293    | 0.246846847 | 0.380712  |
| cellular_component | MLL1/2 complex                                                               | GO:0044665 | 16795 | 28  | 0.985561123 | 0.552695 | 0.58018018  | -1 | 0.1046766237 | 0.333974    | 0.297297297 | -1        |
| cellular_component | MLL1 complex                                                                 | GO:0071339 | 16795 | 28  | 0.985561123 | 0.552695 | 0.58018018  | -1 | 0.1046766237 | 0.333974    | 0.297297297 | -1        |
| cellular_component | Golgi-associated vesicle membrane                                            | GO:0030660 | 16791 | 32  | 0.986351873 | 0.553251 | 0.544144144 | -1 | 0.961911329  | 0.645642    | 0.594594595 | -1        |
| biological_process | positive regulation of reproductive process                                  | GO:2000243 | 16474 | 63  | 0.989782768 | 0.555959 | 0.513513514 | -1 | 0.121376906  | 0.0472789   | 0.156756757 | 0.180819  |
| biological_process | response to interferon-beta                                                  | GO:0035456 | 16514 | 23  | 0.982625622 | 0.557438 | 0.504504505 | -1 | 0.717075572  | 0.990661    | 0.951351351 | -1        |
| biological_process | nucleotide-excision repair                                                   | GO:0006289 | 16491 | 46  | 0.987720624 | 0.557451 | 0.578378378 | -1 | 0.951332633  | 0.716535    | 0.76036036  | -1        |
| biological_process | negative regulation of DNA binding                                           | GO:0043392 | 16508 | 29  | 0.984377805 | 0.557998 | 0.558558559 | -1 | 0.102094577  | 0.422503    | 0.437837838 | -1        |
| biological_process | interaction with host                                                        | GO:0051701 | 16470 | 67  | 0.989581328 | 0.558885 | 0.56036036  | -1 | 0.100543513  | 0.469254    | 0.47027027  | -1        |
| biological_process | monocarboxylic acid biosynthetic process                                     | GO:0072330 | 16388 | 149 | 0.993014301 | 0.559025 | 0.527927928 | -1 | 0.1019351942 | 0.340542    | 0.284684685 | -1        |
| biological_process | protein activation cascade                                                   | GO:0072376 | 16502 | 35  | 0.985498142 | 0.559149 | 0.515315315 | -1 | 0.739311054  | 0.996255    | 0.958558559 | -1        |
| biological_process | icosanoid metabolic process                                                  | GO:0006690 | 16493 | 44  | 0.986983667 | 0.55954  | 0.520720721 | -1 | 0.1074075393 | 0.197061    | 0.212612613 | 0.393572  |
| biological_process | fatty acid derivative metabolic process                                      | GO:1901568 | 16493 | 44  | 0.986983667 | 0.55954  | 0.520720721 | -1 | 0.1074075393 | 0.197061    | 0.212612613 | 0.393572  |
| cellular_component | protein serine/threonine phosphatase complex                                 | GO:0008287 | 16787 | 36  | 0.985395071 | 0.560394 | 0.54954955  | -1 | 0.108509727  | 0.187995    | 0.288288288 | 0.314318  |
| molecular_function | endoribonuclease activity, producing 5'-phosphomonoesters                    | GO:0016891 | 16840 | 21  | 0.980542957 | 0.561147 | 0.596396396 | -1 | 0.86655313   | 0.85541     | 0.834234234 | -1        |
| biological_process | cellular response to interferon-beta                                         | GO:0035458 | 16517 | 20  | 0.979825474 | 0.562149 | 0.497297297 | -1 | 0.630465264  | 0.99791     | 0.983783784 | -1        |
| biological_process | cellular amide metabolic process                                             | GO:0043603 | 16418 | 119 | 0.991754394 | 0.562155 | 0.556756757 | -1 | 0.95376079   | 0.809735    | 0.72972973  | -1        |
| biological_process | regulation of fatty acid metabolic process                                   | GO:0019217 | 16491 | 46  | 0.986243126 | 0.564304 | 0.518918919 | -1 | 0.148510275  | 0.0403165   | 0.061261261 | 0.165748  |
| biological_process | regulation of lipoprotein lipase activity                                    | GO:0051004 | 16512 | 25  | 0.981277891 | 0.564471 | 0.52972973  | -1 | 0.1207850174 | 0.0358202   | 0.091891892 | 0.156869  |
| biological_process | sperm motility                                                               | GO:0030317 | 16508 | 29  | 0.982459541 | 0.565058 | 0.544144144 | -1 | 0.121737987  | 0.127879    | 0.122525253 | 0.305574  |
| cellular_component | outer membrane                                                               | GO:0019867 | 16690 | 133 | 0.991798859 | 0.565308 | 0.540540541 | -1 | 0.1004714536 | 0.462358    | 0.482882883 | -1        |
| biological_process | Golgi vesicle transport                                                      | GO:0048193 | 16418 | 119 | 0.991295048 | 0.565586 | 0.547747748 | -1 | 0.993224911  | 0.551143    | 0.497297297 | -1        |
| cellular_component | Golgi cisterna membrane                                                      | GO:0032580 | 16765 | 58  | 0.987311351 | 0.566586 | 0.572972973 | -1 | 0.103364834  | 0.0859928   | 0.209009009 | 0.131889  |
| biological_process | RNA 3'-end processing                                                        | GO:0031123 | 16489 | 48  | 0.986000162 | 0.566827 | 0.583783784 | -1 | 0.114081874  | 0.0851944   | 0.163963964 | 0.243361  |
| biological_process | cellular response to inorganic substance                                     | GO:0071241 | 16460 | 77  | 0.988797285 | 0.567782 | 0.554954955 | -1 | 0.121617378  | 0.0319605   | 0.052252252 | 0.150117  |
| biological_process | NADP metabolic process                                                       | GO:0006739 | 16509 | 28  | 0.980727296 | 0.570184 | 0.553153153 | -1 | 0.896056214  | 0.829843    | 0.733333333 | -1        |
| biological_process | secretion by tissue                                                          | GO:0032941 | 16470 | 67  | 0.98748935  | 0.570558 | 0.533333333 | -1 | 0.1236059277 | 0.000398912 | 0.007207207 | 0.0183564 |
| molecular_function | intramolecular oxidoreductase activity                                       | GO:0016860 | 16825 | 36  | 0.982765953 | 0.571158 | 0.590990991 | -1 | 0.91343118   | 0.813587    | 0.754954955 | -1        |
| biological_process | protein catabolic process                                                    | GO:0030163 | 16078 | 459 | 0.994796827 | 0.577664 | 0.54954955  | -1 | 0.107140943  | 0.00360055  | 0.086486486 | 0.0589707 |
| molecular_function | carboxylic ester hydrolase activity                                          | GO:0052689 | 16772 | 89  | 0.987883766 | 0.578666 | 0.515315315 | -1 | 0.949359515  | 0.796649    | 0.794594595 | -1        |
| biological_process | virus-host interaction                                                       | GO:0019048 | 16482 | 55  | 0.984561139 | 0.578755 | 0.625225225 | -1 | 0.103568764  | 0.323068    | 0.340540541 | -1        |
| biological_process | regulation of plasma lipoprotein particle levels                             | GO:0097006 | 16499 | 38  | 0.981369928 | 0.578947 | 0.554954955 | -1 | 0.1064403855 | 0.2456      | 0.248648649 | 0.45303   |
| biological_process | regulation of interleukin-12 production                                      | GO:0032655 | 16505 | 32  | 0.979523894 | 0.579602 | 0.583783784 | -1 | 0.107606558  | 0.228015    | 0.261261261 | 0.426316  |
| biological_process | GPI anchor metabolic process                                                 | GO:0006505 | 16498 | 39  | 0.981385677 | 0.579901 | 0.606306301 | -1 | 0.989956487  | 0.543328    | 0.535135135 | -1        |
| molecular_function | DNA polymerase activity                                                      | GO:0034061 | 16830 | 31  | 0.979056415 | 0.580116 | 0.562162162 | -1 | 0.975371854  | 0.593965    | 0.567567568 | -1        |
| biological_process | response to topologically incorrect protein                                  | GO:0035966 | 16474 | 63  | 0.985255123 | 0.580495 | 0.535135135 | -1 | 0.123208193  | 0.0448419   | 0.045045045 | 0.177413  |
| biological_process | negative regulation of endothelial cell proliferation                        | GO:0001937 | 16514 | 23  | 0.974969973 | 0.58243  | 0.547747748 | -1 | 0.1030031753 | 0.401451    | 0.367567568 | -1        |
| biological_process | response to heat                                                             | GO:0009408 | 16466 | 71  | 0.985746726 | 0.582594 | 0.571171171 | -1 | 0.110370678  | 0.0646598   | 0.091891892 | 0.214685  |
| biological_process | mammary gland epithelial cell proliferation                                  | GO:0033598 | 16511 | 26  | 0.976090938 | 0.583705 | 0.533333333 | -1 | 0.1054111979 | 0.316239    | 0.318918919 | -1        |
| biological_process | modification-dependent macromolecule catabolic process                       | GO:0043632 | 16212 | 325 | 0.993180774 | 0.585173 | 0.542342342 | -1 | 0.1086634855 | 0.000314645 | 0.009090909 | 0.056866  |
| biological_process | cellular response to monosaccharide stimulus                                 | GO:0071326 | 16486 | 51  | 0.982330349 | 0.58666  | 0.661261261 | -1 | 0.1098922589 | 0.110198    | 0.034234234 | 0.276598  |
| molecular_function | peptidase activator activity                                                 | GO:0016504 | 16831 | 30  | 0.976907279 | 0.586793 | 0.587387387 | -1 | 0.932942518  | 0.737864    | 0.709090901 | -1        |
| biological_process | regulation of DNA damage response, signal transduction by p53 class mediator | GO:0043516 | 16513 | 24  | 0.973967229 | 0.587497 | 0.621621622 | -1 | 0.901225423  | 0.799212    | 0.81981982  | -1        |
| biological_process | regulation of signal transduction by p53 class mediator                      | GO:1901796 | 16513 | 24  | 0.973967229 | 0.587497 | 0.621621622 | -1 | 0.901225423  | 0.799212    | 0.81981982  | -1        |
| biological_process | GPI anchor biosynthetic process                                              | GO:0006506 | 16505 | 32  | 0.977044747 | 0.589084 | 0.587387387 | -1 | 0.915829464  | 0.795476    | 0.706306306 | -1        |
| cellular_component | nuclear pore                                                                 | GO:0005643 | 16763 | 60  | 0.983236778 | 0.589139 | 0.547747748 | -1 | 0.112665895  | 0.0443425   | 0.163963964 | 0.0417003 |
| molecular_function | calcium-dependent protein binding                                            | GO:0048306 | 16824 | 37  | 0.978541853 | 0.589537 | 0.592792793 | -1 | 0.1090028812 | 0.171168    | 0.21981982  | 0.324723  |
| biological_process | detection of stimulus                                                        | GO:0051606 | 16392 | 145 | 0.989023339 | 0.590973 | 0.536936937 | -1 | 0.925795703  | 0.939971    | 0.89090909  | -1        |
| biological_process | interaction with symbiont                                                    | GO:0051702 | 16505 | 32  | 0.976338039 | 0.591778 | 0.672072072 | -1 | 0.104640418  | 0.32453     | 0.362162162 | -1        |
| biological_process | cellular amine metabolic process                                             | GO:0044106 | 16443 | 94  | 0.986054733 | 0.592865 | 0.56036036  | -1 | 0.990462391  | 0.563832    | 0.551351351 | -1        |
| biological_process | posttranscriptional regulation of gene expression                            | GO:0010608 | 16223 | 314 | 0.992406038 | 0.593059 | 0.614414414 | -1 | 0.1064307853 | 0.0231495   | 0.043243243 | 0.129902  |
| biological_process | cellular response to drug                                                    | GO:0035690 | 16500 | 37  | 0.977601105 | 0.593404 | 0.618018018 | -1 | 0.993391164  | 0.527808    | 0.522525253 | -1        |
| molecular_function | G-protein beta/gamma-subunit complex binding                                 | GO:0031683 | 16821 | 40  | 0.978321703 | 0.593977 | 0.601801802 | -1 | 0.927405409  | 0.787049    | 0.818018018 | -1        |
| molecular_function | vitamin binding                                                              | GO:0019842 | 16792 | 69  | 0.983491508 | 0.594072 | 0.574774775 | -1 | 0.922369557  | 0.868484    | 0.873873874 | -1        |
| cellular_component | spindle microtubule                                                          | GO:0005876 | 16784 | 39  | 0.97770027  | 0.595423 | 0.589189189 | -1 | 0.1005926141 | 0.474423    | 0.464848485 | -1        |
| biological_process | lipid oxidation                                                              | GO:0034440 | 16472 | 65  | 0.982196245 | 0.598386 | 0.576576577 | -1 | 0.888092842  | 0.941312    | 0.913513514 | -1        |
| molecular_function | G-protein coupled nucleotide receptor activity                               | GO:0001608 | 16841 | 20  | 0.967685354 | 0.598897 | 0.536936937 | -1 | 0.1239225085 | 0.0318585   | 0.023423423 | 0.0521526 |
| molecular_function | G-protein coupled purinergic nucleotide receptor activity                    | GO:0045028 | 16841 | 20  | 0.967685354 | 0.598897 | 0.536936937 | -1 | 0.1239225085 | 0.0318585   | 0.023423423 | 0.0521526 |
| biological_process | cellular potassium ion transport                                             | GO:0071804 | 16499 | 38  | 0.976188861 | 0.600478 | 0.576576577 | -1 | 0.184879586  | 0.0240634   | 0.01981982  | 0.133155  |
| biological_process | potassium ion transmembrane transport                                        | GO:0071805 | 16499 | 38  | 0.976188861 | 0.600478 | 0.576576577 | -1 | 0.184879586  | 0.0240634   | 0.01981982  | 0.133155  |
| molecular_function | chloride channel activity                                                    | GO:0005254 | 16799 | 62  | 0.98103835  | 0.602224 | 0.572972973 | -1 | 0.867191911  | 0.965213    | 0.879279279 | -1        |
| biological_process | regulation of acute inflammatory response                                    | GO:0002673 | 16494 | 43  | 0.97673336  | 0.604366 | 0.578378378 | -1 | 0.917855372  | 0.82492     | 0.742342342 | -1        |
| molecular_function | protein serine/threonine/tyrosine kinase activity                            | GO:0004712 | 16835 | 26  | 0.969969509 | 0.604673 | 0.58018018  | -1 | 0.131616398  | 0.00294089  | 0.005405405 | 0         |
| cellular_component | organelle outer membrane                                                     | GO:0031968 | 16694 | 129 | 0.986538772 | 0.604799 | 0.58018018  | -1 | 0.995901555  | 0.532299    | 0.536936937 | -1        |
| biological_process | regulation of interleukin-1 production                                       | GO:0032652 | 16506 | 31  | 0.972005139 | 0.606529 | 0.603603604 | -1 | 0.975180632  | 0.594692    | 0.554954955 | -1        |
| biological_process | cellular lipid catabolic process                                             | GO:0044242 | 16426 | 111 | 0.985210142 | 0.606758 | 0.565765766 | -1 | 0.897428395  | 0.969822    | 0.891891892 | -1        |
| biological_process | detection of mechanical stimulus involved in sensory perception              | GO:0050974 | 16514 | 23  | 0.967272261 | 0.607229 | 0.585585586 | -1 | 0.957576508  | 0.637843    | 0.567567568 | -1        |
| molecular_function | RNA polymerase II transcription cofactor activity                            | GO:0001104 | 16802 | 59  | 0.978982552 | 0.610315 | 0.682882883 | -1 | 0.132299003  | 0.03893     | 0.012612613 | 0.0677333 |
| molecular_function | peptidase activity, acting on L-amino acid tripeptides                       | GO:0070011 | 16375 | 486 | 0.992743467 | 0.610715 | 0.637837838 | -1 | 0.986168668  | 0.703999    | 0.706306306 | -1        |
| biological_process | purine-containing compound biosynthetic process                              | GO:0072522 | 16343 | 194 | 0.988230325 | 0.612446 | 0.562162162 | -1 | 0.982102586  | 0.667993    | 0.67027027  | -1        |
| biological_process | DNA packaging                                                                | GO:0006323 | 16397 | 140 | 0.986069987 | 0.61286  | 0.547747748 | -1 | 0.930777231  | 0.922888    | 0.684684685 | -1        |
| biological_process | interleukin-1 secretion                                                      | GO:0050701 | 16517 | 20  | 0.962810059 | 0.613443 | 0.627027027 | -1 | 0.886676054  | 0.810139    | 0.792792793 | -1        |
| molecular_function | oxidoreductase activity, acting on the aldehyde or oxo group of donors       | GO:0016903 | 168   |     |             |          |             |    |              |             |             |           |

|                    |                                                                                                 |            |       |      |             |          |             |    |             |             |             |           |
|--------------------|-------------------------------------------------------------------------------------------------|------------|-------|------|-------------|----------|-------------|----|-------------|-------------|-------------|-----------|
| biological_process | peptide metabolic process                                                                       | GO:0006518 | 16457 | 80   | 0.980646313 | 0.61815  | 0.590990991 | -1 | 0.98219578  | 0.608942    | 0.562162162 | -1        |
| biological_process | positive regulation of peptide hormone secretion                                                | GO:0090277 | 16487 | 50   | 0.975465803 | 0.618293 | 0.616216216 | -1 | 1.024178021 | 0.383416    | 0.378378378 | -1        |
| biological_process | positive regulation of cell cycle arrest                                                        | GO:0071158 | 16514 | 23   | 0.963638982 | 0.61879  | 0.684684685 | -1 | 1.114748654 | 0.170089    | 0.203603604 | 0.362365  |
| molecular_function | ATPase activity, coupled                                                                        | GO:0042623 | 16585 | 276  | 0.98951655  | 0.619505 | 0.556756757 | -1 | 1.105548041 | 0.00109808  | 0.120720721 | 0         |
| biological_process | protein trimerization                                                                           | GO:0070206 | 16509 | 28   | 0.966409573 | 0.621028 | 0.554954955 | -1 | 0.817289303 | 0.953139    | 0.958558559 | -1        |
| biological_process | M phase                                                                                         | GO:0000279 | 16500 | 37   | 0.970364675 | 0.622722 | 0.581981982 | -1 | 0.934417859 | 0.755467    | 0.724324324 | -1        |
| biological_process | detection of chemical stimulus                                                                  | GO:0005953 | 16473 | 64   | 0.977318738 | 0.623603 | 0.563963964 | -1 | 0.852184163 | 0.979929    | 0.963963964 | -1        |
| cellular_component | nuclear envelope                                                                                | GO:0005635 | 16541 | 282  | 0.989211318 | 0.624201 | 0.581981982 | -1 | 1.050214207 | 0.0703752   | 0.163963964 | 0.0994807 |
| biological_process | signal transduction by p53 class mediator                                                       | GO:0072331 | 16467 | 70   | 0.978076249 | 0.624928 | 0.65045045  | -1 | 1.040182773 | 0.27978     | 0.268468468 | 0.497892  |
| biological_process | regulation of NF-kappaB import into nucleus                                                     | GO:0042345 | 16508 | 29   | 0.965449548 | 0.626504 | 0.627027027 | -1 | 0.760766654 | 0.987242    | 0.944144144 | -1        |
| biological_process | NF-kappaB import into nucleus                                                                   | GO:0042348 | 16508 | 29   | 0.965449548 | 0.626504 | 0.627027027 | -1 | 0.760766654 | 0.987242    | 0.944144144 | -1        |
| biological_process | cellular iron ion homeostasis                                                                   | GO:0006879 | 16508 | 29   | 0.965311933 | 0.626699 | 0.571171171 | -1 | 0.828402125 | 0.945429    | 0.881081081 | -1        |
| biological_process | modification of morphology or physiology of other organism                                      | GO:0035821 | 16494 | 43   | 0.971381327 | 0.627611 | 0.610810811 | -1 | 1.020446785 | 0.40808     | 0.448648649 | -1        |
| molecular_function | S-adenosylmethionine-dependent methyltransferase activity                                       | GO:0008757 | 16764 | 97   | 0.980943564 | 0.627806 | 0.664864865 | -1 | 1.104448333 | 0.0369742   | 0.057657658 | 0.0591676 |
| biological_process | regulation of intrinsic apoptotic signaling pathway                                             | GO:2001242 | 16515 | 22   | 0.958841774 | 0.631056 | 0.742342342 | -1 | 0.94796321  | 0.663886    | 0.693693694 | -1        |
| molecular_function | methylated histone residue binding                                                              | GO:0035064 | 16825 | 36   | 0.967745318 | 0.631411 | 0.636036036 | -1 | 1.116132978 | 0.113487    | 0.189189189 | 0.19837   |
| biological_process | skeletal muscle contraction                                                                     | GO:0003009 | 16514 | 23   | 0.959348454 | 0.632307 | 0.625225225 | -1 | 1.144193456 | 0.115346    | 0.030630631 | 0.283643  |
| biological_process | glutamine family amino acid metabolic process                                                   | GO:0009064 | 16482 | 55   | 0.973461596 | 0.633646 | 0.605405405 | -1 | 1.00678881  | 0.465219    | 0.482882883 | -1        |
| biological_process | amine metabolic process                                                                         | GO:0009308 | 16440 | 97   | 0.979688893 | 0.635922 | 0.603603604 | -1 | 0.991808475 | 0.555757    | 0.565765766 | -1        |
| biological_process | keratinocyte differentiation                                                                    | GO:0030216 | 16473 | 64   | 0.974631736 | 0.63768  | 0.618018018 | -1 | 1.137852965 | 0.0278199   | 0.091891892 | 0.140489  |
| cellular_component | centriole                                                                                       | GO:0005814 | 16763 | 60   | 0.973708718 | 0.638104 | 0.605405405 | -1 | 1.055560085 | 0.227607    | 0.264864865 | 0.385789  |
| cellular_component | condensed nuclear chromosome                                                                    | GO:0000794 | 16751 | 72   | 0.975600857 | 0.640349 | 0.585585586 | -1 | 1.105509589 | 0.0600896   | 0.131531532 | 0.0637733 |
| biological_process | vitamin metabolic process                                                                       | GO:006766  | 16499 | 38   | 0.966370929 | 0.640403 | 0.655855856 | -1 | 0.802123451 | 0.982796    | 0.953153153 | -1        |
| molecular_function | frizzled binding                                                                                | GO:0005109 | 16835 | 26   | 0.959034582 | 0.641366 | 0.652252252 | -1 | 1.080139921 | 0.239374    | 0.291891892 | 0.427824  |
| biological_process | mitotic sister chromatid segregation                                                            | GO:0000070 | 16496 | 41   | 0.967153507 | 0.64237  | 0.58018018  | -1 | 0.967368828 | 0.641477    | 0.672072072 | -1        |
| biological_process | cellular response to hexose stimulus                                                            | GO:0071331 | 16487 | 50   | 0.970226941 | 0.642542 | 0.720720721 | -1 | 0.081723259 | 0.158078    | 0.05045045  | 0.34875   |
| biological_process | cellular response to glucose stimulus                                                           | GO:0071333 | 16487 | 50   | 0.970226941 | 0.642542 | 0.720720721 | -1 | 0.081723259 | 0.158078    | 0.05045045  | 0.34875   |
| molecular_function | protein N-terminus binding                                                                      | GO:0047485 | 16774 | 87   | 0.977447023 | 0.642568 | 0.609090909 | -1 | 0.074756277 | 0.112973    | 0.12972973  | 0.19895   |
| biological_process | cell cycle                                                                                      | GO:0007049 | 15439 | 1098 | 0.993848455 | 0.642659 | 0.547747748 | -1 | 1.041270446 | 0.0071699   | 0.01099091  | 0.0739482 |
| molecular_function | carboxy-lyase activity                                                                          | GO:0016831 | 16831 | 30   | 0.961250764 | 0.643552 | 0.735135135 | -1 | 0.985372077 | 0.555245    | 0.526126126 | -1        |
| cellular_component | chromosome, telomeric region                                                                    | GO:0000781 | 16777 | 46   | 0.968704649 | 0.643628 | 0.731531532 | -1 | 1.028807743 | 0.367355    | 0.342342342 | -1        |
| biological_process | positive regulation of acute inflammatory response                                              | GO:0002675 | 16517 | 20   | 0.952216239 | 0.644463 | 0.664864865 | -1 | 0.843889602 | 0.886868    | 0.814414414 | -1        |
| molecular_function | ATPase binding                                                                                  | GO:0051117 | 16836 | 25   | 0.956456549 | 0.647067 | 0.648648649 | -1 | 0.998249957 | 0.506061    | 0.484684685 | -1        |
| biological_process | regulation of interleukin-4 production                                                          | GO:0032673 | 16517 | 20   | 0.951242721 | 0.647727 | 0.630630631 | -1 | 0.925743785 | 0.717557    | 0.713513514 | -1        |
| cellular_component | condensed chromosome, centromeric region                                                        | GO:0000779 | 16742 | 81   | 0.975679008 | 0.648055 | 0.551351351 | -1 | 0.956792105 | 0.750229    | 0.691891892 | -1        |
| molecular_function | 3'-5' exonuclease activity                                                                      | GO:0008408 | 16838 | 23   | 0.953711811 | 0.649807 | 0.636036036 | -1 | 0.892168708 | 0.814975    | 0.85045045  | -1        |
| biological_process | synapsis                                                                                        | GO:0007129 | 16517 | 20   | 0.950099894 | 0.650555 | 0.648648649 | -1 | 0.967157636 | 0.600486    | 0.576576577 | -1        |
| molecular_function | transferase activity, transferring nitrogenous groups                                           | GO:0016769 | 16839 | 22   | 0.952249345 | 0.651073 | 0.637837838 | -1 | 0.817583901 | 0.930962    | 0.951351351 | -1        |
| biological_process | germ cell development                                                                           | GO:0007281 | 16407 | 130  | 0.980346885 | 0.651635 | 0.672072072 | -1 | 1.030115881 | 0.27523     | 0.345945946 | 0.492546  |
| molecular_function | transition metal ion transmembrane transporter activity                                         | GO:0046915 | 16817 | 44   | 0.965652272 | 0.653643 | 0.655855856 | -1 | 0.772754724 | 0.99553     | 0.987387387 | -1        |
| biological_process | signal transduction in response to DNA damage                                                   | GO:0042770 | 16476 | 61   | 0.970780898 | 0.653973 | 0.657657658 | -1 | 1.044921375 | 0.271339    | 0.237837838 | 0.488221  |
| molecular_function | kinase inhibitor activity                                                                       | GO:0019210 | 16824 | 37   | 0.962221763 | 0.654866 | 0.63963964  | -1 | 1.044325506 | 0.320071    | 0.279279279 | -1        |
| biological_process | regulation of mitochondrial membrane potential                                                  | GO:0051881 | 16511 | 26   | 0.95451352  | 0.656196 | 0.745945946 | -1 | 0.921884595 | 0.755063    | 0.713513514 | -1        |
| molecular_function | protein kinase regulator activity                                                               | GO:0019887 | 16758 | 103  | 0.977144116 | 0.656558 | 0.673873874 | -1 | 1.002233502 | 0.484301    | 0.45045045  | -1        |
| biological_process | centrosome duplication                                                                          | GO:0051298 | 16510 | 27   | 0.955154712 | 0.656893 | 0.636036036 | -1 | 1.09005165  | 0.163093    | 0.133333333 | 0.354362  |
| cellular_component | axosome                                                                                         | GO:0005930 | 16770 | 53   | 0.967943889 | 0.657218 | 0.56036036  | -1 | 0.876208314 | 0.941033    | 0.83963964  | -1        |
| biological_process | acetyl-CoA metabolic process                                                                    | GO:0060084 | 16512 | 25   | 0.953274412 | 0.657269 | 0.654054054 | -1 | 1.040317874 | 0.363399    | 0.381981982 | -1        |
| biological_process | fatty acid oxidation                                                                            | GO:0019395 | 16475 | 62   | 0.970275003 | 0.657712 | 0.666666667 | -1 | 0.878103783 | 0.952111    | 0.940540541 | -1        |
| biological_process | regulation of DNA-dependent transcription, elongation                                           | GO:0032784 | 16508 | 29   | 0.956425368 | 0.657943 | 0.70990991  | -1 | 1.151158312 | 0.0791051   | 0.037837838 | 0.235973  |
| molecular_function | single-stranded RNA binding                                                                     | GO:0003727 | 16822 | 39   | 0.961966377 | 0.659797 | 0.634234234 | -1 | 1.143378802 | 0.0602477   | 0.045045045 | 0.105274  |
| biological_process | heat generation                                                                                 | GO:0031649 | 16516 | 21   | 0.94794986  | 0.660364 | 0.623423423 | -1 | 0.956783802 | 0.634311    | 0.673873874 | -1        |
| cellular_component | kinetochore                                                                                     | GO:0000776 | 16724 | 99   | 0.976061659 | 0.660489 | 0.571171171 | -1 | 1.011302339 | 0.422562    | 0.396396396 | -1        |
| biological_process | regulation of mRNA stability                                                                    | GO:0043488 | 16504 | 33   | 0.958376361 | 0.660792 | 0.72972973  | -1 | 1.06241259  | 0.267108    | 0.264864865 | 0.482061  |
| biological_process | interleukin-4 production                                                                        | GO:0032633 | 16511 | 26   | 0.952843701 | 0.66161  | 0.618018018 | -1 | 1.039269655 | 0.364276    | 0.392792793 | -1        |
| molecular_function | N-acyltransferase activity                                                                      | GO:0016410 | 16766 | 95   | 0.975323524 | 0.661953 | 0.625225225 | -1 | 1.056022001 | 0.171452    | 0.234234234 | 0.323711  |
| cellular_component | stereocilium bundle                                                                             | GO:0032421 | 16796 | 27   | 0.953519295 | 0.662282 | 0.747747748 | -1 | 1.100557996 | 0.182534    | 0.216216216 | 0.30684   |
| biological_process | cell cycle phase                                                                                | GO:0022403 | 16367 | 170  | 0.98155732  | 0.662299 | 0.569369369 | -1 | 1.059488617 | 0.088446    | 0.127927928 | 0.248123  |
| molecular_function | G2/M transition of mitotic cell cycle                                                           | GO:0000086 | 16499 | 38   | 0.960830242 | 0.662306 | 0.61981982  | -1 | 1.10736407  | 0.125556    | 0.151351351 | 0.301165  |
| biological_process | organic cyclic compound binding                                                                 | GO:0097159 | 11895 | 4966 | 0.997095198 | 0.663607 | 0.590990991 | -1 | 1.014623964 | 0.0167857   | 0.317117117 | 0.0238975 |
| biological_process | fatty acid catabolic process                                                                    | GO:0009062 | 16482 | 55   | 0.966957545 | 0.66466  | 0.648648649 | -1 | 0.881635304 | 0.936127    | 0.924324324 | -1        |
| biological_process | fatty acid beta-oxidation                                                                       | GO:0006635 | 16491 | 46   | 0.963431291 | 0.666493 | 0.67027027  | -1 | 0.833027625 | 0.975254    | 0.944144144 | -1        |
| biological_process | cell cycle checkpoint                                                                           | GO:0000075 | 16417 | 120  | 0.977150816 | 0.668291 | 0.601801802 | -1 | 1.075123487 | 0.076282    | 0.063063063 | 0.231308  |
| molecular_function | oxidoreductase activity, acting on the aldehyde or oxo group of donors, NAD or NADP as acceptor | GO:0016620 | 16826 | 35   | 0.957545049 | 0.668408 | 0.609090909 | -1 | 0.713835454 | 0.998335    | 0.971171171 | -1        |
| cellular_component | nuclear body                                                                                    | GO:0016604 | 16560 | 263  | 0.984530143 | 0.669328 | 0.581981982 | -1 | 1.057407242 | 0.0520438   | 0.2         | 0.0526624 |
| biological_process | retrograde transport, endosome to Golgi                                                         | GO:0042147 | 16510 | 27   | 0.950532345 | 0.672069 | 0.708108108 | -1 | 1.04556856  | 0.340751    | 0.333333333 | -1        |
| biological_process | protein ubiquitination                                                                          | GO:0016567 | 16084 | 453  | 0.987854651 | 0.675131 | 0.574774775 | -1 | 1.045921662 | 0.0430411   | 0.214414414 | 0.174027  |
| biological_process | meiotic chromosome segregation                                                                  | GO:0045132 | 16516 | 21   | 0.942409931 | 0.676329 | 0.627027027 | -1 | 0.976225383 | 0.574906    | 0.538738739 | -1        |
| biological_process | response to X-ray                                                                               | GO:0010165 | 16511 | 26   | 0.948080762 | 0.676869 | 0.735135135 | -1 | 1.015436353 | 0.445756    | 0.461261261 | -1        |
| molecular_function | oxidoreductase activity, acting on the CH-NH group of donors                                    | GO:0016645 | 16834 | 27   | 0.948708418 | 0.677971 | 0.610810811 | -1 | 0.741892171 | 0.989962    | 0.899090909 | -1        |
| biological_process | negative regulation of defense response                                                         | GO:0031348 | 16458 | 79   | 0.969728479 | 0.679828 | 0.576576577 | -1 | 0.943805738 | 0.8071      | 0.684684685 | -1        |
| biological_process | porphyrin-containing compound metabolic process                                                 | GO:0006778 | 16496 | 41   | 0.957708856 | 0.680708 | 0.627027027 | -1 | 1.046961103 | 0.301033    | 0.407207207 | -1        |
| biological_process | DNA integrity checkpoint                                                                        | GO:0031570 | 16459 | 78   | 0.969044207 | 0.68251  | 0.679279279 | -1 | 1.08004147  | 0.109861    | 0.185585586 | 0.276182  |
| biological_process | cell cycle phase transition                                                                     | GO:0044770 | 16305 | 232  | 0.981994571 | 0.683855 | 0.583783784 | -1 | 1.076703622 | 0.0207827   | 0.054054054 | 0.12613   |
| biological_process | response to corticosterone stimulus                                                             | GO:0051412 | 16514 | 23   | 0.942286243 | 0.684316 | 0.695495495 | -1 | 0.936965147 | 0.699873    | 0.774777475 | -1        |
| molecular_function | carboxylic acid binding                                                                         | GO:0031406 | 16708 | 153  | 0.977656228 | 0.684684 | 0.637837838 | -1 | 0.952011667 | 0.849155    | 0.846846847 | -1        |
| molecular_function | phosphotransferase activity, phosphate group as acceptor                                        | GO:0016776 | 16830 | 31   | 0.949254704 | 0.687883 | 0.587387387 | -1 | 0.76103599  | 0.899090909 | 0.989464    | -1        |
| cellular_component | histone acetyltransferase complex                                                               | GO:0000123 | 16748 | 75   | 0.967001629 | 0.690094 | 0.609090909 | -1 | 1.096122928 | 0.0742014   | 0.201801802 | 0.115601  |
| cellular_component | proton-transporting V-type ATPase complex                                                       | GO:0033176 | 16800 | 23   | 0.939129905 | 0.693576 | 0.6648      |    |             |             |             |           |

|                    |                                                                                       |            |       |      |             |          |             |    |             |            |             |           |
|--------------------|---------------------------------------------------------------------------------------|------------|-------|------|-------------|----------|-------------|----|-------------|------------|-------------|-----------|
| molecular_function | protein methyltransferase activity                                                    | GO:0008276 | 16786 | 75   | 0.965920043 | 0.695806 | 0.745945946 | -1 | 1.021159077 | 0.375211   | 0.333333333 | -1        |
| biological_process | RNA export from nucleus                                                               | GO:0006405 | 16500 | 37   | 0.951201538 | 0.696642 | 0.731531532 | -1 | 0.988880653 | 0.546703   | 0.524324324 | -1        |
| biological_process | regulation of nitric-oxide synthase activity                                          | GO:0050999 | 16515 | 22   | 0.936084192 | 0.698351 | 0.643243243 | -1 | 0.944604543 | 0.673787   | 0.610810811 | -1        |
| molecular_function | endopeptidase activity                                                                | GO:0004175 | 16554 | 307  | 0.982990734 | 0.698826 | 0.699099099 | -1 | 0.958944205 | 0.89571    | 0.864864865 | -1        |
| biological_process | sister chromatid segregation                                                          | GO:0000819 | 16493 | 44   | 0.954262773 | 0.700642 | 0.616216216 | -1 | 0.988258971 | 0.553746   | 0.571171171 | -1        |
| cellular_component | cis-Golgi network                                                                     | GO:0005801 | 16795 | 28   | 0.942378741 | 0.701454 | 0.736936937 | -1 | 0.944293524 | 0.695333   | 0.715315315 | -1        |
| molecular_function | thiolester hydrolase activity                                                         | GO:0016790 | 16760 | 101  | 0.96967994  | 0.701737 | 0.598198198 | -1 | 0.985207276 | 0.601912   | 0.524324324 | -1        |
| biological_process | positive regulation of insulin secretion                                              | GO:0032024 | 16499 | 38   | 0.950420369 | 0.701958 | 0.72972973  | -1 | 1.03811662  | 0.341857   | 0.313513514 | -1        |
| biological_process | nuclear-transcribed mRNA catabolic process, nonsense-mediated decay                   | GO:0000184 | 16505 | 32   | 0.945851331 | 0.702334 | 0.76036036  | -1 | 0.990323271 | 0.53779    | 0.567567568 | -1        |
| biological_process | nucleobase metabolic process                                                          | GO:0009112 | 16512 | 25   | 0.938655909 | 0.702541 | 0.699099099 | -1 | 0.945099273 | 0.682919   | 0.666666667 | -1        |
| biological_process | release of cytochrome c from mitochondria                                             | GO:0001836 | 16491 | 46   | 0.954624141 | 0.70328  | 0.713513514 | -1 | 0.90503331  | 0.868055   | 0.87027027  | -1        |
| biological_process | ATP metabolic process                                                                 | GO:0046034 | 16412 | 125  | 0.971525773 | 0.710069 | 0.747747748 | -1 | 0.975463384 | 0.683341   | 0.666666667 | -1        |
| biological_process | protein modification by small protein conjugation                                     | GO:0032446 | 16052 | 485  | 0.985639594 | 0.710933 | 0.594594595 | -1 | 1.043423609 | 0.0463718  | 0.214414414 | 0.17972   |
| molecular_function | androgen receptor binding                                                             | GO:0050681 | 16838 | 23   | 0.933022107 | 0.711162 | 0.636036036 | -1 | 1.331623797 | 0.00292022 | 0.021621622 | 0         |
| biological_process | negative regulation of cell cycle phase transition                                    | GO:1901988 | 16405 | 132  | 0.971741402 | 0.713875 | 0.625225225 | -1 | 1.107929586 | 0.0155249  | 0.023423423 | 0.105907  |
| cellular_component | cilium membrane                                                                       | GO:0060170 | 16803 | 20   | 0.926456751 | 0.715677 | 0.758558559 | -1 | 0.938023566 | 0.684526   | 0.691891892 | -1        |
| biological_process | modification by host of symbiont morphology or physiology                             | GO:0051851 | 16515 | 22   | 0.929702175 | 0.716186 | 0.745945946 | -1 | 1.12669268  | 0.151524   | 0.221621622 | 0.342041  |
| biological_process | placenta development                                                                  | GO:0001890 | 16416 | 121  | 0.970058653 | 0.716558 | 0.706306306 | -1 | 1.081759699 | 0.0589846  | 0.189189189 | 0.202783  |
| cellular_component | cytoplasmic stress granule                                                            | GO:0010494 | 16797 | 26   | 0.934887477 | 0.717539 | 0.607207207 | -1 | 1.10072666  | 0.186657   | 0.210810811 | 0.3148    |
| biological_process | peptidyl-proline modification                                                         | GO:0018208 | 16508 | 29   | 0.938014208 | 0.718617 | 0.589189189 | -1 | 0.873568892 | 0.881077   | 0.724324324 | -1        |
| molecular_function | transaminase activity                                                                 | GO:0008483 | 16841 | 20   | 0.924956113 | 0.719608 | 0.690909099 | -1 | 0.847835912 | 0.880884   | 0.911711712 | -1        |
| biological_process | negative regulation of leukocyte apoptotic process                                    | GO:2000107 | 16511 | 26   | 0.934103581 | 0.719887 | 0.78018018  | -1 | 0.94551324  | 0.684975   | 0.706306306 | -1        |
| molecular_function | heterocyclic compound binding                                                         | GO:1901363 | 11950 | 4911 | 0.995946962 | 0.720553 | 0.603603604 | -1 | 1.014029487 | 0.0215533  | 0.324324324 | 0.0506614 |
| biological_process | cell division                                                                         | GO:0051301 | 16129 | 408  | 0.983501749 | 0.720601 | 0.610810811 | -1 | 1.027915356 | 0.161371   | 0.190990991 | 0.351332  |
| biological_process | energy derivation by oxidation of organic compounds                                   | GO:0015980 | 16388 | 149  | 0.972414938 | 0.721029 | 0.673873874 | -1 | 0.890236627 | 0.990134   | 0.922525253 | -1        |
| biological_process | mitotic DNA damage checkpoint                                                         | GO:0044773 | 16513 | 24   | 0.930451141 | 0.722618 | 0.74954955  | -1 | 1.073052493 | 0.267534   | 0.189189189 | 0.482574  |
| biological_process | regulation of release of cytochrome c from mitochondria                               | GO:0900199 | 16509 | 28   | 0.935074708 | 0.724286 | 0.735135135 | -1 | 0.840880073 | 0.927812   | 0.895495495 | -1        |
| molecular_function | nucleobase-containing compound transmembrane transporter activity                     | GO:0015932 | 16839 | 22   | 0.926667332 | 0.724476 | 0.828828829 | -1 | 1.115542923 | 0.173791   | 0.162162162 | 0.326631  |
| cellular_component | early endosome membrane                                                               | GO:0031901 | 16760 | 63   | 0.956691258 | 0.724597 | 0           | -1 | 1.083898113 | 0.123925   | 0.254054054 | 0.226825  |
| molecular_function | protein serine/threonine phosphatase activity                                         | GO:0004722 | 16820 | 41   | 0.946195109 | 0.724911 | 0.673873874 | -1 | 0.996355553 | 0.51615    | 0.511711712 | -1        |
| biological_process | water-soluble vitamin metabolic process                                               | GO:0006767 | 16517 | 20   | 0.922442287 | 0.726143 | 0.810810811 | -1 | 0.778839199 | 0.956757   | 0.962162162 | -1        |
| molecular_function | intramolecular transferase activity                                                   | GO:0016866 | 16834 | 27   | 0.932893756 | 0.727239 | 0.747747748 | -1 | 0.888059188 | 0.843352   | 0.837837838 | -1        |
| molecular_function | oxidoreductase activity, acting on CH-OH group of donors                              | GO:0016614 | 16733 | 128  | 0.969182435 | 0.727842 | 0.677477747 | -1 | 0.988280493 | 0.591157   | 0.56036036  | -1        |
| biological_process | calcium ion-dependent exocytosis                                                      | GO:0017156 | 16491 | 46   | 0.948380265 | 0.728178 | 0.681081081 | -1 | 1.131240373 | 0.061311   | 0.201801802 | 0.207106  |
| biological_process | interleukin-1 beta production                                                         | GO:0032611 | 16505 | 32   | 0.938028413 | 0.728357 | 0.74954955  | -1 | 0.973779529 | 0.601493   | 0.540540541 | -1        |
| biological_process | plasma lipoprotein particle clearance                                                 | GO:0034381 | 16514 | 23   | 0.926811948 | 0.72885  | 0.715315315 | -1 | 1.098627625 | 0.206163   | 0.25045045  | 0.403927  |
| molecular_function | protein kinase inhibitor activity                                                     | GO:0004860 | 16828 | 33   | 0.938679287 | 0.729325 | 0.745945946 | -1 | 1.034534112 | 0.365449   | 0.313513514 | -1        |
| cellular_component | SNARE complex                                                                         | GO:0031201 | 16797 | 26   | 0.930822768 | 0.729557 | 0.740540541 | -1 | 0.854759229 | 0.900392   | 0.87027027  | -1        |
| biological_process | regulation of DNA recombination                                                       | GO:0000018 | 16500 | 37   | 0.94201709  | 0.729612 | 0.664864865 | -1 | 0.985755979 | 0.559734   | 0.590990991 | -1        |
| biological_process | regulation of cell cycle arrest                                                       | GO:0071156 | 16504 | 33   | 0.937832239 | 0.732123 | 0.745945946 | -1 | 1.144087022 | 0.0756339  | 0.144144144 | 0.229285  |
| molecular_function | steroid dehydrogenase activity                                                        | GO:0016229 | 16831 | 30   | 0.934733528 | 0.732294 | 0.675675676 | -1 | 0.96093447  | 0.644672   | 0.609009009 | -1        |
| biological_process | tetrapyrrole metabolic process                                                        | GO:0033013 | 16489 | 48   | 0.948210804 | 0.733176 | 0.672072072 | -1 | 1.018738006 | 0.410937   | 0.464864865 | -1        |
| molecular_function | flavin adenine dinucleotide binding                                                   | GO:0050660 | 16786 | 75   | 0.958553573 | 0.733398 | 0.726126126 | -1 | 1.00907193  | 0.445766   | 0.473873874 | -1        |
| biological_process | activin receptor signaling pathway                                                    | GO:0032924 | 16507 | 30   | 0.934380489 | 0.733408 | 0.70450405  | -1 | 1.093324056 | 0.187775   | 0.234234234 | 0.381867  |
| biological_process | G1/S transition of mitotic cell cycle                                                 | GO:0000082 | 16440 | 97   | 0.963381503 | 0.734536 | 0.659459459 | -1 | 1.073268127 | 0.10501    | 0.127927928 | 0.26748   |
| biological_process | genetic imprinting                                                                    | GO:0071514 | 16517 | 20   | 0.918735659 | 0.735626 | 0.733333333 | -1 | 1.214062554 | 0.0485458  | 0.097297297 | 0.182046  |
| cellular_component | mitochondrial outer membrane                                                          | GO:0005741 | 16712 | 111  | 0.965370667 | 0.736979 | 0.722522523 | -1 | 0.955830452 | 0.790666   | 0.718918919 | -1        |
| cellular_component | chromosome, centromeric region                                                        | GO:0000775 | 16683 | 140  | 0.969097381 | 0.738217 | 0.598198198 | -1 | 1.040571852 | 0.201865   | 0           | 0.331578  |
| biological_process | cellular response to radiation                                                        | GO:0071478 | 16463 | 74   | 0.957102791 | 0.739131 | 0.895495495 | -1 | 0.992868206 | 0.542433   | 0.531531532 | -1        |
| biological_process | protein polyubiquitination                                                            | GO:0000209 | 16426 | 111  | 0.964912839 | 0.739735 | 0.654054054 | -1 | 1.061264559 | 0.130994   | 0.192792793 | 0.310489  |
| molecular_function | monosaccharide binding                                                                | GO:0048029 | 16804 | 57   | 0.950240637 | 0.742745 | 0.736936937 | -1 | 0.94030237  | 0.782897   | 0.882882883 | -1        |
| biological_process | regulation of intracellular steroid hormone receptor signaling pathway                | GO:0033143 | 16500 | 37   | 0.93815047  | 0.742937 | 0.735135135 | -1 | 1.117227588 | 0.108149   | 0.178378378 | 0.273824  |
| biological_process | protein K48-linked ubiquitination                                                     | GO:0070936 | 16500 | 37   | 0.938094906 | 0.743125 | 0.693693694 | -1 | 0.989096373 | 0.545802   | 0.533333333 | -1        |
| biological_process | membrane invagination                                                                 | GO:0010324 | 16517 | 20   | 0.915282993 | 0.744306 | 0.690909099 | -1 | 1.030261002 | 0.407298   | 0.434234234 | -1        |
| biological_process | spindle checkpoint                                                                    | GO:0031577 | 16511 | 26   | 0.925540523 | 0.744793 | 0.690909099 | -1 | 1.055665516 | 0.311369   | 0.257657658 | -1        |
| biological_process | regulation of fatty acid transport                                                    | GO:2000191 | 16517 | 20   | 0.914781117 | 0.745556 | 0.668468468 | -1 | 1.155645381 | 0.113844   | 0.142342342 | 0.282745  |
| biological_process | secondary metabolic process                                                           | GO:0019748 | 16513 | 24   | 0.921980722 | 0.746195 | 0.754954955 | -1 | 0.795559333 | 0.958726   | 0.953153153 | -1        |
| biological_process | regulation of monooxygenase activity                                                  | GO:0032768 | 16507 | 30   | 0.930212297 | 0.746625 | 0.731531532 | -1 | 0.867221803 | 0.896323   | 0.816216216 | -1        |
| molecular_function | oxidoreductase activity, acting on the CH-OH group of donors, NAD or NADP as acceptor | GO:0016616 | 16741 | 120  | 0.965040352 | 0.747207 | 0.693693694 | -1 | 0.970761306 | 0.711164   | 0.598198198 | -1        |
| biological_process | positive regulation of oxidoreductase activity                                        | GO:0051353 | 16509 | 28   | 0.927343569 | 0.747467 | 0.70450405  | -1 | 0.928660886 | 0.743597   | 0.657657658 | -1        |
| biological_process | organic acid metabolic process                                                        | GO:0006082 | 15819 | 718  | 0.98583618  | 0.749304 | 0.598198198 | -1 | 0.950632257 | 0.990431   | 0.92972973  | -1        |
| biological_process | ventricular system development                                                        | GO:0021591 | 16517 | 20   | 0.912549885 | 0.751071 | 0.762162162 | -1 | 1.034977428 | 0.393174   | 0.416216216 | -1        |
| molecular_function | peptidase activity                                                                    | GO:0008233 | 16352 | 509  | 0.982910785 | 0.751149 | 0.762162162 | -1 | 0.989200142 | 0.665901   | 0.67027027  | -1        |
| biological_process | histone ubiquitination                                                                | GO:0016574 | 16506 | 31   | 0.929748456 | 0.751173 | 0.652252252 | -1 | 1.211013651 | 0.0208322  | 0.073873874 | 0.125913  |
| biological_process | reactive oxygen species metabolic process                                             | GO:0072593 | 16439 | 98   | 0.960518359 | 0.751453 | 0.627027027 | -1 | 0.952877304 | 0.791168   | 0.679279279 | -1        |
| biological_process | cellular modified amino acid metabolic process                                        | GO:0006575 | 16394 | 143  | 0.967150701 | 0.752853 | 0.655855856 | -1 | 0.88570207  | 0.991291   | 0.96036036  | -1        |
| biological_process | spindle organization                                                                  | GO:0007051 | 16472 | 65   | 0.951105042 | 0.753077 | 0.636036036 | -1 | 0.944918802 | 0.779576   | 0.807207207 | -1        |
| biological_process | small molecule biosynthetic process                                                   | GO:0044283 | 16173 | 364  | 0.97951563  | 0.753213 | 0.618018018 | -1 | 0.945056082 | 0.966832   | 0.843243243 | -1        |
| biological_process | single fertilization                                                                  | GO:0007338 | 16493 | 44   | 0.940446062 | 0.753393 | 0.771171171 | -1 | 0.975849493 | 0.609455   | 0.601801802 | -1        |
| biological_process | calcium ion import                                                                    | GO:0070509 | 16512 | 25   | 0.920888285 | 0.753553 | 0.679279279 | -1 | 1.131057079 | 0.128014   | 0.216216216 | 0.305854  |
| biological_process | regulation of translational initiation                                                | GO:0006446 | 16502 | 35   | 0.93310953  | 0.753713 | 0.827027027 | -1 | 0.907616641 | 0.828366   | 0.897297297 | -1        |
| cellular_component | cilium axoneme                                                                        | GO:0035085 | 16783 | 40   | 0.937316243 | 0.754124 | 0.625225225 | -1 | 0.912898731 | 0.830295   | 0.762162162 | -1        |
| cellular_component | microtubule-based flagellar cytoplasm                                                 | GO:0097014 | 16783 | 40   | 0.937316243 | 0.754124 | 0.625225225 | -1 | 0.912898731 | 0.830295   | 0.762162162 | -1        |
| biological_process | microtubule organizing center organization                                            | GO:0031023 | 16476 | 61   | 0.94925861  | 0.754199 | 0.713513514 | -1 | 0.998805868 | 0.50648    | 0.499099099 | -1        |
| biological_process | negative regulation of translation                                                    | GO:0017148 | 16482 | 55   | 0.945978793 | 0.756518 | 0.702702703 | -1 | 1.121563979 | 0.0588963  | 0.066666667 | 0.202886  |
| biological_process | DNA conformation change                                                               | GO:0071103 | 16370 | 167  | 0.969014516 | 0.75715  | 0.572972973 | -1 | 0.960889489 | 0.810572   | 0.632432432 | -1        |
| biological_process | brown fat cell differentiation                                                        | GO:0050873 | 16508 | 29   | 0.924828231 | 0.758611 | 0.713513514 | -1 | 0.970512095 | 0.608474   | 0.589189189 | -1        |
| biological_process | negative regulation of inflammatory response                                          | GO:0050728 | 16475 | 62   | 0.948623914 | 0.758683 | 0.673873874 | -1 | 0.930255599 | 0.82       |             |           |

|                    |                                                                        |            |       |      |             |          |             |    |             |            |             |            |
|--------------------|------------------------------------------------------------------------|------------|-------|------|-------------|----------|-------------|----|-------------|------------|-------------|------------|
| biological_process | interphase of mitotic cell cycle                                       | GO:0051329 | 16416 | 121  | 0.96293554  | 0.760795 | 0.663063063 | -1 | 1.099719899 | 0.0282701  | 0.041441441 | 0.14249    |
| biological_process | regulation of odontogenesis                                            | GO:0042481 | 16516 | 21   | 0.910592769 | 0.7612   | 0.742342342 | -1 | 1.350804076 | 0.00266636 | 0.027027027 | 0.0524577  |
| biological_process | prostanoid metabolic process                                           | GO:0006692 | 16514 | 23   | 0.914255843 | 0.762018 | 0.765765766 | -1 | 0.911011657 | 0.770282   | 0.794594595 | -1         |
| biological_process | prostaglandin metabolic process                                        | GO:0006693 | 16514 | 23   | 0.914255843 | 0.762018 | 0.765765766 | -1 | 0.911011657 | 0.770282   | 0.794594595 | -1         |
| biological_process | response to temperature stimulus                                       | GO:0009266 | 16418 | 119  | 0.962227187 | 0.763118 | 0.688288288 | -1 | 1.065682674 | 0.106494   | 0.131531532 | 0.270097   |
| biological_process | negative regulation of G1/S transition of mitotic cell cycle           | GO:2000134 | 16510 | 27   | 0.920298843 | 0.763611 | 0.753153153 | -1 | 1.22567513  | 0.0210393  | 0.01981982  | 0.126781   |
| cellular_component | replication fork                                                       | GO:0005657 | 16782 | 41   | 0.935148317 | 0.764287 | 0.736936937 | -1 | 1.119664148 | 0.0919609  | 0.032432432 | 0.148365   |
| biological_process | positive regulation of glial cell differentiation                      | GO:0045687 | 16513 | 24   | 0.91482546  | 0.76526  | 0.796396396 | -1 | 1.008463654 | 0.471372   | 0.479279279 | -1         |
| molecular_function | deaminase activity                                                     | GO:0019239 | 16841 | 20   | 0.905883631 | 0.767153 | 0.783783784 | -1 | 0.925288221 | 0.71874    | 0.675675676 | -1         |
| biological_process | serine family amino acid metabolic process                             | GO:0009069 | 16508 | 29   | 0.921537992 | 0.768086 | 0.720720721 | -1 | 0.924152669 | 0.760573   | 0.8         | -1         |
| molecular_function | hydrolase activity, hydrolyzing N-glycosyl compounds                   | GO:0016799 | 16841 | 20   | 0.905803013 | 0.769046 | 0.726126126 | -1 | 1.014820956 | 0.454284   | 0.452252522 | -1         |
| molecular_function | voltage-gated anion channel activity                                   | GO:0008308 | 16841 | 20   | 0.905077083 | 0.76906  | 0.776576577 | -1 | 1.000510663 | 0.498432   | 0.544144144 | -1         |
| biological_process | positive regulation of translation                                     | GO:0045727 | 16493 | 44   | 0.935902791 | 0.769584 | 0.774774775 | -1 | 0.954933407 | 0.697957   | 0.767567568 | -1         |
| biological_process | nuclear division                                                       | GO:0000280 | 16231 | 306  | 0.97581493  | 0.770292 | 0.609090909 | -1 | 0.987955756 | 0.643741   | 0.663063063 | -1         |
| biological_process | mitosis                                                                | GO:0007067 | 16231 | 306  | 0.97581493  | 0.770292 | 0.609090909 | -1 | 0.987955756 | 0.643741   | 0.663063063 | -1         |
| biological_process | pyridine-containing compound metabolic process                         | GO:0072524 | 16479 | 58   | 0.943539641 | 0.772212 | 0.731531532 | -1 | 0.8268696   | 0.988928   | 0.911717172 | -1         |
| cellular_component | nuclear chromosome part                                                | GO:0044454 | 16585 | 238  | 0.9722011   | 0.772803 | 0.634234234 | -1 | 1.077313101 | 0.0187293  | 0.05045045  | 0.00807947 |
| biological_process | DNA damage response, signal transduction by p53 class mediator         | GO:0030330 | 16487 | 50   | 0.938849404 | 0.773418 | 0.74954955  | -1 | 1.016825233 | 0.418267   | 0.414414414 | -1         |
| biological_process | T cell activation involved in immune response                          | GO:0002286 | 16498 | 39   | 0.930528276 | 0.774098 | 0.781981982 | -1 | 1.154901172 | 0.0467239  | 0.118918919 | 0.1804     |
| biological_process | mitotic cell cycle checkpoint                                          | GO:0007093 | 16483 | 54   | 0.940774763 | 0.774913 | 0.724324324 | -1 | 1.094461731 | 0.114247   | 0.079279279 | 0.282295   |
| molecular_function | anion channel activity                                                 | GO:0005253 | 16792 | 69   | 0.947571596 | 0.775147 | 0.762162162 | -1 | 0.857885271 | 0.979767   | 0.96036036  | -1         |
| biological_process | peptide biosynthetic process                                           | GO:0043043 | 16514 | 23   | 0.909039907 | 0.775225 | 0.742324324 | -1 | 0.992347664 | 0.52538    | 0.547747748 | -1         |
| biological_process | interphase                                                             | GO:0051325 | 16405 | 132  | 0.961397879 | 0.779762 | 0.688288288 | -1 | 1.091017148 | 0.034498   | 0.048648649 | 0.153351   |
| biological_process | temperature homeostasis                                                | GO:0001659 | 16502 | 35   | 0.923918545 | 0.782452 | 0.742324324 | -1 | 0.944373669 | 0.715889   | 0.785585586 | -1         |
| biological_process | positive regulation of exocytosis                                      | GO:0045921 | 16502 | 35   | 0.923704319 | 0.783098 | 0.699090909 | -1 | 1.167773335 | 0.0426271  | 0.021621622 | 0.173146   |
| biological_process | chromosome organization involved in meiosis                            | GO:0070192 | 16511 | 26   | 0.911219146 | 0.783709 | 0.700900901 | -1 | 0.97645374  | 0.582453   | 0.554954955 | -1         |
| molecular_function | ubiquitin-protein ligase activity                                      | GO:0004842 | 16629 | 232  | 0.970413588 | 0.784075 | 0.63963964  | -1 | 1.056773915 | 0.0657512  | 0.183783784 | 0.10392    |
| molecular_function | acetyltransferase activity                                             | GO:0016407 | 16768 | 93   | 0.95291886  | 0.784836 | 0.733333333 | -1 | 1.102293448 | 0.0433197  | 0.091891892 | 0.0720538  |
| biological_process | regulation of mitochondrion organization                               | GO:0010821 | 16493 | 44   | 0.931109407 | 0.786001 | 0.76036036  | -1 | 0.91600365  | 0.833081   | 0.731531532 | -1         |
| molecular_function | glutathione transferase activity                                       | GO:0004364 | 16837 | 24   | 0.90647668  | 0.786457 | 0.634234234 | -1 | 0.634113599 | 0.999055   | 0.857657658 | -1         |
| biological_process | retinoic acid receptor signaling pathway                               | GO:0048384 | 16516 | 21   | 0.89961081  | 0.787388 | 0.821621622 | -1 | 1.037746241 | 0.382184   | 0.389189189 | -1         |
| cellular_component | cytoplasm                                                              | GO:0005737 | 8891  | 7932 | 0.996233014 | 0.787959 | 0.603603604 | -1 | 0.988965758 | 0.990399   | 0.711717172 | -1         |
| cellular_component | nuclear chromatin                                                      | GO:0000790 | 16683 | 140  | 0.961161443 | 0.787976 | 0.769369369 | -1 | 1.06818548  | 0.0802751  | 0.181981982 | 0.131726   |
| biological_process | detection of stimulus involved in sensory perception                   | GO:0050906 | 16459 | 78   | 0.947840444 | 0.788104 | 0.664864865 | -1 | 0.882639959 | 0.96404    | 0.920720721 | -1         |
| biological_process | regulation of calcium ion transmembrane transporter activity           | GO:1901019 | 16516 | 21   | 0.899276802 | 0.788157 | 0.741441444 | -1 | 1.203742564 | 0.0528121  | 0.061261261 | 0.189655   |
| biological_process | cellular response to hydrogen peroxide                                 | GO:0070301 | 16494 | 43   | 0.92910786  | 0.789966 | 0.700900901 | -1 | 0.862464784 | 0.941118   | 0.879279279 | -1         |
| molecular_function | ribosome binding                                                       | GO:0043022 | 16834 | 27   | 0.910076713 | 0.791032 | 0.778378378 | -1 | 0.903452126 | 0.807762   | 0.753153153 | -1         |
| molecular_function | iron ion binding                                                       | GO:0005506 | 16689 | 172  | 0.96429904  | 0.792494 | 0.654054054 | -1 | 0.957437591 | 0.83445    | 0.859459459 | -1         |
| biological_process | detection of chemical stimulus involved in sensory perception of smell | GO:0050911 | 16506 | 31   | 0.915251598 | 0.793356 | 0.67027027  | -1 | 0.811826095 | 0.965352   | 0.875675676 | -1         |
| cellular_component | late endosome membrane                                                 | GO:0031902 | 16753 | 70   | 0.943496193 | 0.794055 | 0.747747748 | -1 | 0.881146455 | 0.957828   | 0.846846847 | -1         |
| biological_process | negative regulation of cell cycle process                              | GO:0010948 | 16376 | 161  | 0.962709819 | 0.794928 | 0.684684685 | -1 | 1.073743763 | 0.0516958  | 0.077477477 | 0.1874     |
| biological_process | protein modification by small protein conjugation or removal           | GO:0070647 | 15988 | 549  | 0.979979593 | 0.795749 | 0.609090909 | -1 | 1.045292768 | 0.0307917  | 0.214414414 | 0.146947   |
| biological_process | positive regulation of fat cell differentiation                        | GO:0045600 | 16511 | 26   | 0.906479463 | 0.795789 | 0.846846847 | -1 | 0.941499161 | 0.697469   | 0.713513514 | -1         |
| biological_process | single-organism biosynthetic process                                   | GO:0044711 | 16164 | 373  | 0.975567835 | 0.795827 | 0.636036036 | -1 | 0.934356248 | 0.986833   | 0.873873874 | -1         |
| biological_process | cell cycle process                                                     | GO:0022402 | 15757 | 780  | 0.983295814 | 0.79616  | 0.6         | -1 | 1.039317718 | 0.0256874  | 0.108108108 | 0.137036   |
| biological_process | ER to Golgi vesicle-mediated transport                                 | GO:0006888 | 16491 | 46   | 0.929338417 | 0.797103 | 0.895495495 | -1 | 0.937367384 | 0.769398   | 0.807207207 | -1         |
| cellular_component | chromosome                                                             | GO:0005694 | 16215 | 608  | 0.980705175 | 0.799378 | 0.612612613 | -1 | 1.030278023 | 0.0938991  | 0.2         | 0.147268   |
| biological_process | positive regulation of viral reproduction                              | GO:0048524 | 16504 | 33   | 0.915719638 | 0.799403 | 0.818018018 | -1 | 1.060037886 | 0.274943   | 0.25045045  | 0.492578   |
| molecular_function | mRNA binding                                                           | GO:0003729 | 16777 | 84   | 0.947140131 | 0.799901 | 0.729727973 | -1 | 1.026252398 | 0.338052   | 0.423423423 | -1         |
| molecular_function | damaged DNA binding                                                    | GO:0003684 | 16819 | 42   | 0.924067668 | 0.803295 | 0.895495495 | -1 | 0.932748788 | 0.775139   | 0.76036036  | -1         |
| cellular_component | heterochromatin                                                        | GO:0000792 | 16760 | 63   | 0.937567018 | 0.805097 | 0.738738739 | -1 | 1.068851573 | 0.171479   | 0.268468468 | 0.295629   |
| biological_process | positive regulation of DNA repair                                      | GO:0045739 | 16513 | 24   | 0.89484252  | 0.805568 | 0.866666667 | -1 | 0.981112413 | 0.563731   | 0.58018018  | -1         |
| cellular_component | nuclear chromosome                                                     | GO:0000228 | 16556 | 267  | 0.96948232  | 0.808029 | 0.673873874 | -1 | 1.063943467 | 0.0340579  | 0.088288288 | 0.0350009  |
| biological_process | meiosis I                                                              | GO:0007127 | 16474 | 63   | 0.936712596 | 0.808342 | 0.781981982 | -1 | 1.046273048 | 0.261957   | 0.315315315 | 0.474657   |
| cellular_component | nuclear speck                                                          | GO:0009411 | 16443 | 94   | 0.948062156 | 0.809149 | 0.877477477 | -1 | 0.982539927 | 0.615665   | 0.594594595 | -1         |
| biological_process | response to UV                                                         | GO:0016607 | 16682 | 141  | 0.95726184  | 0.811318 | 0.668468468 | -1 | 0.995918221 | 0.533615   | 0.527927928 | -1         |
| cellular_component | nuclear heterochromatin                                                | GO:0005720 | 16797 | 26   | 0.899562464 | 0.812267 | 0.801801802 | -1 | 1.035636461 | 0.376396   | 0.409009009 | -1         |
| biological_process | response to cold                                                       | GO:0009409 | 16501 | 36   | 0.914382035 | 0.813486 | 0.774774775 | -1 | 0.929307307 | 0.768992   | 0.837837838 | -1         |
| biological_process | protein K63-linked ubiquitination                                      | GO:0070534 | 16510 | 27   | 0.900703055 | 0.814467 | 0.890909009 | -1 | 1.006887593 | 0.475285   | 0.497297297 | -1         |
| biological_process | negative regulation of mitotic cell cycle phase transition             | GO:1901991 | 16471 | 66   | 0.936564264 | 0.81447  | 0.729727973 | -1 | 1.15656338  | 0.0136413  | 0.012612613 | 0.0995363  |
| cellular_component | nucleus                                                                | GO:0005634 | 11729 | 5094 | 0.993946308 | 0.814951 | 0.609090909 | -1 | 1.034090338 | 0.224E-07  | 0.012612613 | 0          |
| biological_process | macromolecule methylation                                              | GO:0043414 | 16390 | 147  | 0.957237921 | 0.816528 | 0.740540541 | -1 | 1.144817263 | 0.00112589 | 0.01981982  | 0.0420124  |
| biological_process | regulation of chromosome segregation                                   | GO:0051983 | 16514 | 23   | 0.891394058 | 0.816697 | 0.641441441 | -1 | 0.996575097 | 0.511376   | 0.509909991 | -1         |
| biological_process | negative regulation of cytokine secretion                              | GO:0050710 | 16513 | 24   | 0.893631775 | 0.816815 | 0.762162162 | -1 | 0.794405421 | 0.959585   | 0.890909009 | -1         |
| biological_process | mitotic cell cycle phase transition                                    | GO:0044772 | 16361 | 176  | 0.960861922 | 0.817054 | 0.668468468 | -1 | 1.085671315 | 0.0238976  | 0.052252252 | 0.132917   |
| molecular_function | cyclin-dependent protein serine/threonine kinase regulator activity    | GO:0016538 | 16840 | 21   | 0.885361282 | 0.818173 | 0.763963964 | -1 | 0.969354084 | 0.596164   | 0.58018018  | -1         |
| biological_process | monocarboxylic acid catabolic process                                  | GO:0072329 | 16472 | 65   | 0.934862674 | 0.818976 | 0.776576577 | -1 | 0.882448015 | 0.950001   | 0.918918919 | -1         |
| biological_process | glutamate metabolic process                                            | GO:0006536 | 16515 | 22   | 0.887661116 | 0.819465 | 0.821621622 | -1 | 1.107821478 | 0.190378   | 0.246846847 | 0.38609    |
| biological_process | cellular response to UV                                                | GO:0034644 | 16501 | 36   | 0.91184578  | 0.820481 | 0.863063063 | -1 | 1.037183802 | 0.34945    | 0.308108108 | -1         |
| biological_process | positive regulation of interferon-gamma production                     | GO:0032729 | 16507 | 30   | 0.902421662 | 0.82294  | 0.751351351 | -1 | 0.741281127 | 0.992299   | 0.953153153 | -1         |
| biological_process | regulation of leukocyte apoptotic process                              | GO:2000106 | 16492 | 45   | 0.919942312 | 0.824211 | 0.841441441 | -1 | 0.983236484 | 0.577342   | 0.574774775 | -1         |
| biological_process | pyridine nucleotide metabolic process                                  | GO:0019362 | 16483 | 54   | 0.926706106 | 0.824974 | 0.792792793 | -1 | 0.814945167 | 0.990846   | 0.918918919 | -1         |
| biological_process | nicotinamide nucleotide metabolic process                              | GO:0046496 | 16483 | 54   | 0.926706106 | 0.824974 | 0.792792793 | -1 | 0.814945167 | 0.990846   | 0.918918919 | -1         |
| biological_process | glucosamine-containing compound metabolic process                      | GO:1901071 | 16512 | 25   | 0.892149527 | 0.825053 | 0.758558559 | -1 | 0.858481499 | 0.890013   | 0.884684685 | -1         |
| biological_process | cellular response to reactive oxygen species                           | GO:0034614 | 16471 | 66   | 0.933531752 | 0.825685 | 0.744144144 | -1 | 0.955428137 | 0.735166   | 0.711717172 | -1         |
| biological_process | RNA stabilization                                                      | GO:0043489 | 16513 | 24   | 0.888104083 | 0.829003 | 0.841441441 | -1 | 1.090623196 | 0.2208     | 0.268468468 | 0.419537   |
| biological_process | mRNA stabilization                                                     | GO:0048255 | 16513 | 24   | 0.888104083 | 0.829003 | 0.841441441 | -1 | 1.090623196 | 0.2208     | 0.268468468 | 0.419537   |
| biological_process | DNA duplex unwinding                                                   | GO:0032508 | 16517 | 20   | 0.877055753 | 0.829698 | 0.727927928 | -1 | 1.119268432 | 0.177643   | 0.212       |            |

|                    |                                                                                                           |            |       |      |             |          |             |    |             |            |             |           |
|--------------------|-----------------------------------------------------------------------------------------------------------|------------|-------|------|-------------|----------|-------------|----|-------------|------------|-------------|-----------|
| biological_process | centrosome cycle                                                                                          | GO:0007098 | 16502 | 35   | 0.90632092  | 0.831729 | 0.846846847 | -1 | 1.022262081 | 0.409701   | 0.416216216 | -1        |
| biological_process | protein methylation                                                                                       | GO:0006479 | 16435 | 102  | 0.945170411 | 0.832023 | 0.828828829 | -1 | 1.109352554 | 0.0275049  | 0.037837838 | 0.140738  |
| biological_process | protein alkylation                                                                                        | GO:0008213 | 16435 | 102  | 0.945170411 | 0.832023 | 0.828828829 | -1 | 1.109352554 | 0.0275049  | 0.037837838 | 0.140738  |
| biological_process | developmental programmed cell death                                                                       | GO:0010623 | 16515 | 22   | 0.881389039 | 0.832556 | 0.809009009 | -1 | 0.992516398 | 0.524276   | 0.495495495 | -1        |
| molecular_function | hydro-lyase activity                                                                                      | GO:0016836 | 16821 | 40   | 0.912021696 | 0.832715 | 0.675675676 | -1 | 0.852123663 | 0.947588   | 0.864864865 | -1        |
| biological_process | organelle fission                                                                                         | GO:0048285 | 16207 | 330  | 0.969436326 | 0.834369 | 0.645045045 | -1 | 0.985209052 | 0.680919   | 0.672072072 | -1        |
| biological_process | DNA replication                                                                                           | GO:0006260 | 16319 | 218  | 0.962157625 | 0.835065 | 0.657657658 | -1 | 1.01387633  | 0.360508   | 0.369369369 | -1        |
| biological_process | regulation of oxidoreductase activity                                                                     | GO:0051341 | 16491 | 46   | 0.917163517 | 0.835107 | 0.789189189 | -1 | 0.876976621 | 0.926096   | 0.812612613 | -1        |
| molecular_function | four-way junction helicase activity                                                                       | GO:0009378 | 16835 | 26   | 0.889497207 | 0.835651 | 0.798198198 | -1 | 1.015794014 | 0.444498   | 0.457657658 | -1        |
| cellular_component | endoplasmic reticulum-Golgi intermediate compartment membrane                                             | GO:0033116 | 16800 | 23   | 0.881257063 | 0.838199 | 0.85045045  | -1 | 0.860872095 | 0.876269   | 0.861261261 | -1        |
| biological_process | spindle assembly                                                                                          | GO:0051225 | 16501 | 36   | 0.904814811 | 0.838999 | 0.751351351 | -1 | 0.933926314 | 0.754109   | 0.702702703 | -1        |
| biological_process | S phase                                                                                                   | GO:0051320 | 16517 | 20   | 0.871740704 | 0.83993  | 0.830630631 | -1 | 1.082456119 | 0.261393   | 0.187387387 | 0.474514  |
| biological_process | protein ADP-ribosylation                                                                                  | GO:0006471 | 16517 | 20   | 0.87112394  | 0.841091 | 0.881081081 | -1 | 1.141901231 | 0.135708   | 0.01981982  | 0.318263  |
| molecular_function | GABA receptor activity                                                                                    | GO:0016917 | 16840 | 21   | 0.873991669 | 0.841548 | 0.691891892 | -1 | 0.959492512 | 0.626181   | 0.556756757 | -1        |
| molecular_function | acyl-CoA dehydrogenase activity                                                                           | GO:0003995 | 16841 | 20   | 0.870686123 | 0.841904 | 0.963963964 | -1 | 0.847136113 | 0.88196    | 0.801801802 | -1        |
| molecular_function | NF-kappaB binding                                                                                         | GO:0051059 | 16839 | 22   | 0.87655462  | 0.842211 | 0.763963964 | -1 | 0.974456366 | 0.582263   | 0.609009009 | -1        |
| biological_process | regulation of mRNA processing                                                                             | GO:0050684 | 16494 | 43   | 0.911426183 | 0.843128 | 0.781981982 | -1 | 1.053838633 | 0.270187   | 0.288288288 | 0.486345  |
| molecular_function | olfactory receptor activity                                                                               | GO:0004984 | 16829 | 32   | 0.897243636 | 0.843228 | 0.695495495 | -1 | 0.791058062 | 0.97978    | 0.90990991  | -1        |
| biological_process | insulin secretion involved in cellular response to glucose stimulus                                       | GO:0035773 | 16515 | 22   | 0.875578709 | 0.844124 | 0.902702703 | -1 | 0.931395251 | 0.711504   | 0.747747748 | -1        |
| biological_process | regulation of insulin secretion involved in cellular response to glucose stimulus                         | GO:0061178 | 16515 | 22   | 0.875578709 | 0.844124 | 0.902702703 | -1 | 0.931395251 | 0.711504   | 0.747747748 | -1        |
| molecular_function | cysteine-type endopeptidase regulator activity involved in apoptotic process                              | GO:0043028 | 16828 | 33   | 0.898359086 | 0.844317 | 0.882882883 | -1 | 0.939750371 | 0.725782   | 0.781981982 | -1        |
| biological_process | positive regulation of release of cytochrome c from mitochondria                                          | GO:0090200 | 16517 | 20   | 0.8687234   | 0.845556 | 0.818018018 | -1 | 0.877642283 | 0.828544   | 0.769369369 | -1        |
| biological_process | interleukin-1 production                                                                                  | GO:0032612 | 16501 | 36   | 0.901895599 | 0.846307 | 0.81981982  | -1 | 0.920183508 | 0.796859   | 0.709009001 | -1        |
| molecular_function | onuclease activity, active with either ribo- or deoxyribonucleic acids and producing 5'-phosphomonoesters | GO:0016893 | 16827 | 34   | 0.898875177 | 0.846703 | 0.864864865 | -1 | 0.871109979 | 0.90373    | 0.868464868 | -1        |
| cellular_component | cilium part                                                                                               | GO:0044441 | 16724 | 99   | 0.940691293 | 0.84736  | 0.702702703 | -1 | 0.981143387 | 0.627772   | 0.648648649 | -1        |
| biological_process | regulation of response to DNA damage stimulus                                                             | GO:2001020 | 16458 | 79   | 0.933319688 | 0.848279 | 0.848648649 | -1 | 1.021896961 | 0.367737   | 0.32972973  | -1        |
| molecular_function | iron ion transmembrane transporter activity                                                               | GO:0005381 | 16838 | 23   | 0.876192461 | 0.848303 | 0.854054054 | -1 | 0.703651057 | 0.993119   | 0.996396396 | -1        |
| biological_process | centrosome organization                                                                                   | GO:0051297 | 16482 | 55   | 0.919755903 | 0.849094 | 0.78018018  | -1 | 0.956999179 | 0.709987   | 0.661261261 | -1        |
| biological_process | regulation of lymphocyte apoptotic process                                                                | GO:0070228 | 16509 | 28   | 0.887422389 | 0.849138 | 0.798198198 | -1 | 0.925089014 | 0.754028   | 0.717171717 | -1        |
| biological_process | heme metabolic process                                                                                    | GO:0042168 | 16509 | 28   | 0.886424684 | 0.85127  | 0.717171712 | -1 | 0.980165816 | 0.572206   | 0.569369369 | -1        |
| biological_process | alpha-beta T cell proliferation                                                                           | GO:0046633 | 16516 | 21   | 0.868755361 | 0.851401 | 0.884684685 | -1 | 1.108458083 | 0.194514   | 0.228828829 | 0.392195  |
| biological_process | ciliary or flagellar motility                                                                             | GO:0001539 | 16516 | 21   | 0.868548046 | 0.851782 | 0.774774775 | -1 | 0.779684585 | 0.959933   | 0.940540541 | -1        |
| cellular_component | nuclear lumen                                                                                             | GO:0031981 | 15156 | 1667 | 0.985923174 | 0.85287  | 0.628828829 | -1 | 1.03389506  | 0.00577516 | 0.108108108 | 0         |
| biological_process | cellular macromolecule catabolic process                                                                  | GO:0044265 | 16062 | 475  | 0.972589483 | 0.853167 | 0.673873874 | -1 | 1.068180815 | 0.00450708 | 0.034234234 | 0.0570546 |
| molecular_function | N-acetyltransferase activity                                                                              | GO:0008080 | 16781 | 80   | 0.932246179 | 0.853643 | 0.781981982 | -1 | 1.088624526 | 0.0843717  | 0.147747748 | 0.156077  |
| biological_process | sensory perception of light stimulus                                                                      | GO:0050953 | 16430 | 107  | 0.941421523 | 0.853836 | 0.818018018 | -1 | 0.883042043 | 0.982241   | 0.953153153 | -1        |
| biological_process | chromosome segregation                                                                                    | GO:0007059 | 16403 | 134  | 0.947644302 | 0.854092 | 0.655855856 | -1 | 1.005403828 | 0.456693   | 0.441441441 | -1        |
| biological_process | ribonucleoside monophosphate biosynthetic process                                                         | GO:0009156 | 16506 | 31   | 0.89025375  | 0.855297 | 0.891891892 | -1 | 0.994381832 | 0.521645   | 0.544144144 | -1        |
| biological_process | apoptotic mitochondrial changes                                                                           | GO:0008637 | 16476 | 61   | 0.921683674 | 0.855766 | 0.85045045  | -1 | 0.876840947 | 0.952466   | 0.92972973  | -1        |
| biological_process | response to oxidative stress                                                                              | GO:0006979 | 16291 | 246  | 0.961159899 | 0.856148 | 0.751351351 | -1 | 0.930052622 | 0.972226   | 0.855855856 | -1        |
| cellular_component | cytosol                                                                                                   | GO:0005829 | 15695 | 1128 | 0.982164011 | 0.858643 | 0.718918919 | -1 | 0.956856095 | 0.995319   | 0.828828829 | -1        |
| cellular_component | chromosomal part                                                                                          | GO:0044427 | 16293 | 530  | 0.973475074 | 0.858757 | 0.630630631 | -1 | 1.023049384 | 0.175611   | 0.297297297 | 0.294744  |
| biological_process | regulation of DNA repair                                                                                  | GO:0006282 | 16493 | 44   | 0.906117295 | 0.859963 | 0.899099099 | -1 | 1.018995449 | 0.413526   | 0.403603604 | -1        |
| cellular_component | PCG protein complex                                                                                       | GO:0031519 | 16786 | 37   | 0.897514972 | 0.860149 | 0.731531532 | -1 | 1.068952907 | 0.233532   | 0.194594595 | 0.389148  |
| biological_process | visual perception                                                                                         | GO:0007601 | 16431 | 106  | 0.939451883 | 0.860663 | 0.821621622 | -1 | 0.87350634  | 0.988185   | 0.962162162 | -1        |
| molecular_function | protein transporter activity                                                                              | GO:0008565 | 16784 | 77   | 0.928839281 | 0.860835 | 0.904504505 | -1 | 1.024813229 | 0.352722   | 0.306306306 | -1        |
| molecular_function | nucleotidyltransferase activity                                                                           | GO:0016779 | 16752 | 109  | 0.940091725 | 0.86146  | 0.76036036  | -1 | 0.889347333 | 0.977653   | 0.864864865 | -1        |
| biological_process | sulfur amino acid metabolic process                                                                       | GO:0000096 | 16507 | 30   | 0.884729016 | 0.863161 | 0.834234234 | -1 | 1.024831065 | 0.406818   | 0.43963964  | -1        |
| biological_process | negative regulation of insulin secretion                                                                  | GO:0046676 | 16506 | 31   | 0.88573628  | 0.864994 | 0.836036036 | -1 | 1.077951133 | 0.225903   | 0.275675676 | 0.424245  |
| molecular_function | aminoacyl-tRNA ligase activity                                                                            | GO:0004812 | 16817 | 44   | 0.904074829 | 0.865115 | 0.895495495 | -1 | 0.942075845 | 0.747426   | 0.747747748 | -1        |
| molecular_function | ligase activity, forming carbon-oxygen bonds                                                              | GO:0016875 | 16817 | 44   | 0.904074829 | 0.865115 | 0.895495495 | -1 | 0.942075845 | 0.747426   | 0.747747748 | -1        |
| molecular_function | ligase activity, forming aminoacyl-tRNA and related compounds                                             | GO:0016876 | 16817 | 44   | 0.904074829 | 0.865115 | 0.895495495 | -1 | 0.942075845 | 0.747426   | 0.747747748 | -1        |
| biological_process | membrane fusion                                                                                           | GO:0061025 | 16469 | 68   | 0.922744266 | 0.865593 | 0.884684685 | -1 | 0.993860577 | 0.535035   | 0.583783784 | -1        |
| cellular_component | methylation                                                                                               | GO:0032259 | 16385 | 152  | 0.948361309 | 0.866061 | 0.763963964 | -1 | 1.138911933 | 0.00144073 | 0.023423423 | 0.0433432 |
| biological_process | response to copper ion                                                                                    | GO:0001669 | 16765 | 58   | 0.916062522 | 0.866323 | 0.836036036 | -1 | 1.086199281 | 0.127346   | 0.158558555 | 0.225996  |
| biological_process | purine nucleoside monophosphate metabolic process                                                         | GO:0009126 | 16510 | 27   | 0.876547607 | 0.866944 | 0.918918919 | -1 | 0.892264549 | 0.834098   | 0.899099099 | -1        |
| biological_process | reciprocal meiotic recombination                                                                          | GO:0007131 | 16514 | 23   | 0.864951574 | 0.869208 | 0.74954955  | -1 | 1.058409181 | 0.313666   | 0.36036036  | -1        |
| biological_process | reciprocal DNA recombination                                                                              | GO:0035825 | 16514 | 23   | 0.864951574 | 0.869208 | 0.74954955  | -1 | 1.058409181 | 0.313666   | 0.36036036  | -1        |
| molecular_function | exonuclease activity                                                                                      | GO:0004527 | 16809 | 52   | 0.910212894 | 0.86933  | 0.857657658 | -1 | 0.924760863 | 0.826709   | 0.85045045  | -1        |
| cellular_component | peroxisome                                                                                                | GO:0005777 | 16697 | 126  | 0.94239478  | 0.869545 | 0.792792793 | -1 | 0.868426336 | 0.994883   | 0.976576577 | -1        |
| cellular_component | microbody                                                                                                 | GO:0042579 | 16697 | 126  | 0.94239478  | 0.869545 | 0.792792793 | -1 | 0.868426336 | 0.994883   | 0.976576577 | -1        |
| biological_process | oxoacid metabolic process                                                                                 | GO:0043436 | 15830 | 707  | 0.97611705  | 0.869569 | 0.702702703 | -1 | 0.946340258 | 0.994232   | 0.936936937 | -1        |
| biological_process | nucleotide biosynthetic process                                                                           | GO:0009165 | 16285 | 252  | 0.959390602 | 0.869768 | 0.803603604 | -1 | 0.968177513 | 0.811083   | 0.747747748 | -1        |
| biological_process | proteolysis involved in cellular protein catabolic process                                                | GO:0051603 | 16184 | 353  | 0.965731711 | 0.870218 | 0.672072072 | -1 | 1.065726664 | 0.015308   | 0.100909001 | 0.106157  |
| biological_process | cellular protein catabolic process                                                                        | GO:0044257 | 16172 | 365  | 0.965731711 | 0.871368 | 0.686486486 | -1 | 1.059762936 | 0.0227634  | 0.102702703 | 0.129252  |
| molecular_function | 2 iron, 2 sulfur cluster binding                                                                          | GO:0051537 | 16840 | 21   | 0.857143406 | 0.87174  | 0.855855856 | -1 | 0.7393863   | 0.980771   | 0.873873874 | -1        |
| biological_process | ATP biosynthetic process                                                                                  | GO:0006754 | 16485 | 52   | 0.909063264 | 0.872372 | 0.742342342 | -1 | 0.802911113 | 0.993162   | 0.855855856 | -1        |
| biological_process | negative regulation of peptide secretion                                                                  | GO:0002792 | 16501 | 36   | 0.890652095 | 0.872377 | 0.861261261 | -1 | 1.007726293 | 0.467987   | 0.481081081 | -1        |
| biological_process | one-carbon metabolic process                                                                              | GO:0006730 | 16508 | 29   | 0.87803511  | 0.872584 | 0.807207207 | -1 | 0.876187739 | 0.96036036 | 0.96036036  | -1        |
| biological_process | regulation of cation channel activity                                                                     | GO:2001257 | 16510 | 27   | 0.873143538 | 0.873423 | 0.789189189 | -1 | 1.232496704 | 0.0181217  | 0.01981982  | 0.114925  |
| cellular_component | peroxisomal membrane                                                                                      | GO:0005778 | 16770 | 53   | 0.908803277 | 0.875302 | 0.812612613 | -1 | 0.949075954 | 0.739947   | 0.738738739 | -1        |
| cellular_component | microbody membrane                                                                                        | GO:0031903 | 16770 | 53   | 0.908803277 | 0.875302 | 0.812612613 | -1 | 0.949075954 | 0.739947   | 0.738738739 | -1        |
| biological_process | positive regulation of multi-organism process                                                             | GO:0043902 | 16500 | 37   | 0.889280057 | 0.878576 | 0.845045045 | -1 | 1.031243509 | 0.37089    | 0.358558559 | -1        |
| biological_process | purine ribonucleoside monophosphate metabolic process                                                     | GO:0009167 | 16511 | 26   | 0.867524758 | 0.879199 | 0.926126126 | -1 | 0.909767938 | 0.787451   | 0.908108108 | -1        |
| biological_process | eye photoreceptor cell development                                                                        | GO:0042462 | 16510 | 27   | 0.868646585 | 0.881641 | 0.861261261 | -1 | 1.037551083 | 0.367608   | 0.371717171 | -1        |
| biological_process | sister chromatid cohesion                                                                                 | GO:0007062 | 16507 | 30   | 0.873893329 | 0.884448 | 0.713513514 | -1 | 1.120272184 | 0.126723   | 0.25045045  | 0.303379  |
| cellular_component | Cajal body                                                                                                | GO:0015030 | 16781 | 42   | 0.893327473 | 0.884726 | 0.854054054 | -1 | 1.001803518 | 0.491923   | 0.504504505 | -1        |
| biological_process | positive regulation of mitochondrion organization                                                         | GO:0010822 | 16510 | 27   | 0.864879714 | 0.888228 | 0.855855856 | -1 | 0.914184957 | 0.78025    | 0.708108108 | -1        |

|                    |                                                                                                                  |            |       |      |             |          |             |    |             |             |             |          |
|--------------------|------------------------------------------------------------------------------------------------------------------|------------|-------|------|-------------|----------|-------------|----|-------------|-------------|-------------|----------|
| biological_process | mRNA transport                                                                                                   | GO:0051028 | 16465 | 72   | 0.916956922 | 0.88938  | 0.801801802 | -1 | 1.008339361 | 0.451143    | 0.455855856 | -1       |
| biological_process | amino acid activation                                                                                            | GO:0043038 | 16492 | 45   | 0.89482835  | 0.889474 | 0.918918919 | -1 | 0.936577457 | 0.769737    | 0.778378378 | -1       |
| biological_process | tRNA aminoacylation                                                                                              | GO:0043039 | 16492 | 45   | 0.89482835  | 0.889474 | 0.918918919 | -1 | 0.936577457 | 0.769737    | 0.778378378 | -1       |
| biological_process | detection of chemical stimulus involved in sensory perception                                                    | GO:0050907 | 16493 | 44   | 0.893551152 | 0.88966  | 0.738738739 | -1 | 0.795918929 | 0.990562    | 0.953153153 | -1       |
| biological_process | pyrimidine ribonucleoside metabolic process                                                                      | GO:0046131 | 16508 | 29   | 0.868043459 | 0.89102  | 0.76036036  | -1 | 0.823969269 | 0.949854    | 0.836036036 | -1       |
| biological_process | mitotic spindle organization                                                                                     | GO:0007052 | 16509 | 28   | 0.865382166 | 0.89157  | 0.713513514 | -1 | 1.055641595 | 0.3049      | 0.324324324 | -1       |
| biological_process | tRNA aminoacylation for protein translation                                                                      | GO:0006418 | 16494 | 43   | 0.890552411 | 0.893396 | 0.926126126 | -1 | 0.940889082 | 0.749309    | 0.736936937 | -1       |
| biological_process | aerobic respiration                                                                                              | GO:0009060 | 16500 | 37   | 0.88182137  | 0.893722 | 0.834234234 | -1 | 0.765106979 | 0.993387    | 0.90990991  | -1       |
| molecular_function | lyase activity                                                                                                   | GO:0016829 | 16702 | 159  | 0.94311336  | 0.894066 | 0.827027027 | -1 | 0.959054838 | 0.815545    | 0.762162162 | -1       |
| molecular_function | involvement in, with incorporation or reduction of molecular oxygen, reduced flavin or flavoprotein as one donor | GO:0016712 | 16825 | 36   | 0.879921226 | 0.89422  | 0.772972973 | -1 | 1.023742402 | 0.40246     | 0.432432432 | -1       |
| biological_process | diterpenoid metabolic process                                                                                    | GO:0016101 | 16503 | 34   | 0.876252254 | 0.894559 | 0.805405405 | -1 | 0.857379435 | 0.925342    | 0.848648649 | -1       |
| biological_process | negative regulation of peptide hormone secretion                                                                 | GO:0090278 | 16502 | 35   | 0.877835778 | 0.894938 | 0.886486486 | -1 | 1.016630011 | 0.432293    | 0.463063063 | -1       |
| biological_process | negative regulation of hormone secretion                                                                         | GO:0046888 | 16491 | 46   | 0.891748973 | 0.898584 | 0.911717172 | -1 | 0.979549691 | 0.595074    | 0.56036036  | -1       |
| biological_process | nucleoside monophosphate biosynthetic process                                                                    | GO:0009124 | 16505 | 32   | 0.870139084 | 0.898613 | 0.936936937 | -1 | 0.999663186 | 0.501338    | 0.545945946 | -1       |
| biological_process | ATP catabolic process                                                                                            | GO:0006200 | 16467 | 70   | 0.912193129 | 0.898888 | 0.895495495 | -1 | 1.006260784 | 0.463801    | 0.477477477 | -1       |
| biological_process | spermatid differentiation                                                                                        | GO:0048515 | 16458 | 79   | 0.91728292  | 0.899122 | 0.859459459 | -1 | 1.026141897 | 0.343341    | 0.428828829 | -1       |
| molecular_function | tRNA binding                                                                                                     | GO:0000049 | 16834 | 27   | 0.857910291 | 0.899709 | 0.899099099 | -1 | 0.935656929 | 0.718906    | 0.751351351 | -1       |
| cellular_component | nuclear periphery                                                                                                | GO:0034399 | 16733 | 90   | 0.921625686 | 0.901707 | 0.821621622 | -1 | 1.042457103 | 0.242115    | 0.252252252 | 0.401767 |
| biological_process | photoreceptor cell development                                                                                   | GO:0042461 | 16504 | 33   | 0.870068883 | 0.902198 | 0.848648649 | -1 | 1.018964299 | 0.425111    | 0.43963964  | -1       |
| molecular_function | calcium activated cation channel activity                                                                        | GO:0005227 | 16839 | 22   | 0.840389363 | 0.902787 | 0.920720721 | -1 | 1.125533117 | 0.153745    | 0.16036036  | 0.30314  |
| molecular_function | carboxylesterase activity                                                                                        | GO:0004091 | 16831 | 30   | 0.863065432 | 0.90325  | 0.767567568 | -1 | 0.986546316 | 0.550837    | 0.506306306 | -1       |
| cellular_component | motile cilium                                                                                                    | GO:0031514 | 16717 | 106  | 0.927298877 | 0.903304 | 0.753153153 | -1 | 0.949578382 | 0.816482    | 0.814414414 | -1       |
| cellular_component | cell projection cytoplasm                                                                                        | GO:0032838 | 16767 | 56   | 0.899792872 | 0.903381 | 0.828828829 | -1 | 0.953309136 | 0.727819    | 0.758585859 | -1       |
| cellular_component | synaptonemal complex                                                                                             | GO:0000795 | 16794 | 29   | 0.858474398 | 0.906793 | 0.872072072 | -1 | 1.038984276 | 0.357958    | 0.389189189 | -1       |
| biological_process | mitotic DNA integrity checkpoint                                                                                 | GO:0044774 | 16510 | 27   | 0.852965475 | 0.907328 | 0.884684685 | -1 | 1.056672093 | 0.304875    | 0.25045045  | -1       |
| cellular_component | organelle membrane                                                                                               | GO:0031090 | 14786 | 2037 | 0.984095065 | 0.907628 | 0.681081081 | -1 | 0.988186051 | 0.837769    | 0.627027027 | -1       |
| molecular_function | tetrapyrrole binding                                                                                             | GO:0046906 | 16720 | 141  | 0.935571874 | 0.908349 | 0.846846847 | -1 | 0.944286762 | 0.875078    | 0.805405405 | -1       |
| cellular_component | centrosome                                                                                                       | GO:0005813 | 16458 | 365  | 0.960194368 | 0.908528 | 0.754954955 | -1 | 1.016011593 | 0.296078    | 0.333333333 | 0.47196  |
| cellular_component | condensed chromosome                                                                                             | GO:0000793 | 16658 | 165  | 0.940417514 | 0.908606 | 0.664864685 | -1 | 1.034294998 | 0.221158    | 0.322522523 | 0.361498 |
| biological_process | retinoid metabolic process                                                                                       | GO:0001523 | 16508 | 29   | 0.856971742 | 0.909114 | 0.801801802 | -1 | 0.806629834 | 0.964486    | 0.89009009  | -1       |
| cellular_component | non-membrane-bounded organelle                                                                                   | GO:0043228 | 13901 | 2922 | 0.987011687 | 0.909506 | 0.666666667 | -1 | 1.008618816 | 0.187379    | 0.338738739 | 0.312073 |
| cellular_component | intracellular non-membrane-bounded organelle                                                                     | GO:0043232 | 13901 | 2922 | 0.987011687 | 0.909506 | 0.666666667 | -1 | 1.008618816 | 0.187379    | 0.338738739 | 0.312073 |
| biological_process | sulfur compound biosynthetic process                                                                             | GO:0044272 | 16469 | 68   | 0.906515989 | 0.909563 | 0.864864685 | -1 | 1.010312937 | 0.441351    | 0.50990991  | -1       |
| biological_process | histone H3 acetylation                                                                                           | GO:0043966 | 16492 | 45   | 0.88450596  | 0.9105   | 0.832432432 | -1 | 1.159109469 | 0.0320703   | 0.023423423 | 0.149912 |
| cellular_component | SCF ubiquitin ligase complex                                                                                     | GO:0019005 | 16797 | 26   | 0.847923752 | 0.910559 | 0.891891892 | -1 | 0.826402287 | 0.937538    | 0.87027027  | -1       |
| molecular_function | RNA methyltransferase activity                                                                                   | GO:0008173 | 16831 | 30   | 0.857320756 | 0.912266 | 0.879279279 | -1 | 0.937564353 | 0.723371    | 0.736936937 | -1       |
| molecular_function | GDP binding                                                                                                      | GO:0019003 | 16819 | 42   | 0.879312174 | 0.912525 | 0.85045045  | -1 | 0.897922642 | 0.874372    | 0.845045045 | -1       |
| cellular_component | primary cilium                                                                                                   | GO:0072372 | 16727 | 96   | 0.920185201 | 0.912838 | 0.90990991  | -1 | 1.069791746 | 0.117453    | 0.117171717 | 0.199266 |
| biological_process | positive regulation of response to DNA damage stimulus                                                           | GO:2001022 | 16495 | 42   | 0.877839809 | 0.915136 | 0.902702703 | -1 | 0.978589355 | 0.595106    | 0.601801802 | -1       |
| biological_process | ferrous iron transport                                                                                           | GO:0015684 | 16517 | 20   | 0.821976359 | 0.916189 | 0.926126126 | -1 | 0.700957698 | 0.989772    | 0.987387387 | -1       |
| biological_process | alpha-amino acid biosynthetic process                                                                            | GO:1901607 | 16468 | 69   | 0.903867787 | 0.917141 | 0.83963964  | -1 | 0.909781285 | 0.903342    | 0.812612613 | -1       |
| molecular_function | ferrous iron transmembrane transporter activity                                                                  | GO:0015093 | 16841 | 20   | 0.820739465 | 0.917165 | 0.927927928 | -1 | 0.701358532 | 0.989686    | 0.987387387 | -1       |
| biological_process | nucleobase-containing compound transport                                                                         | GO:0015931 | 16428 | 109  | 0.923236845 | 0.918164 | 0.832432432 | -1 | 1.000864274 | 0.493772    | 0.479279279 | -1       |
| biological_process | organic acid biosynthetic process                                                                                | GO:0016053 | 16286 | 251  | 0.949384962 | 0.919211 | 0.787387387 | -1 | 0.959690853 | 0.867527    | 0.789189189 | -1       |
| biological_process | carboxylic acid biosynthetic process                                                                             | GO:0046394 | 16286 | 251  | 0.949384962 | 0.919211 | 0.787387387 | -1 | 0.959690853 | 0.867527    | 0.789189189 | -1       |
| biological_process | organelle fusion                                                                                                 | GO:0048284 | 16487 | 50   | 0.88567472  | 0.919603 | 0.978378378 | -1 | 0.90616336  | 0.875152    | 0.936936937 | -1       |
| biological_process | tRNA modification                                                                                                | GO:0006400 | 16513 | 24   | 0.834661329 | 0.919848 | 0.881081081 | -1 | 0.808665556 | 0.947897    | 0.956756757 | -1       |
| biological_process | DNA geometric change                                                                                             | GO:0032392 | 16515 | 22   | 0.827100663 | 0.920088 | 0.816216216 | -1 | 1.053274743 | 0.332487    | 0.320720721 | -1       |
| molecular_function | CoA hydrolase activity                                                                                           | GO:0016289 | 16841 | 20   | 0.818189351 | 0.920613 | 0.846846847 | -1 | 0.511268267 | 0.999924    | 0.989189189 | -1       |
| biological_process | cellular modified amino acid biosynthetic process                                                                | GO:0042398 | 16488 | 49   | 0.883299527 | 0.921775 | 0.827027027 | -1 | 0.898939503 | 0.890126    | 0.715315315 | -1       |
| biological_process | benzene-containing compound metabolic process                                                                    | GO:0042537 | 16517 | 20   | 0.816758057 | 0.922245 | 0.956756757 | -1 | 0.762996844 | 0.966897    | 0.944144444 | -1       |
| biological_process | spermatid development                                                                                            | GO:0007286 | 16463 | 74   | 0.904681167 | 0.922705 | 0.891891892 | -1 | 1.015996018 | 0.405624    | 0.457657658 | -1       |
| biological_process | pyrimidine-containing compound metabolic process                                                                 | GO:0072527 | 16487 | 50   | 0.882842446 | 0.924662 | 0.778378378 | -1 | 0.926400457 | 0.816698    | 0.736936937 | -1       |
| molecular_function | DNA-directed RNA polymerase activity                                                                             | GO:0003899 | 16825 | 36   | 0.861642112 | 0.92499  | 0.758558559 | -1 | 0.712298984 | 0.99862     | 0.933333333 | -1       |
| molecular_function | RNA polymerase activity                                                                                          | GO:0034062 | 16825 | 36   | 0.861642112 | 0.92499  | 0.758558559 | -1 | 0.712298984 | 0.99862     | 0.933333333 | -1       |
| biological_process | dicarboxylic acid metabolic process                                                                              | GO:0043648 | 16463 | 74   | 0.903261009 | 0.925731 | 0.897297297 | -1 | 0.969420083 | 0.676066    | 0.75675676  | -1       |
| biological_process | cellular response to oxidative stress                                                                            | GO:0034599 | 16444 | 93   | 0.913460076 | 0.926427 | 0.906306306 | -1 | 0.960327856 | 0.74685     | 0.738738739 | -1       |
| biological_process | pigment biosynthetic process                                                                                     | GO:0046148 | 16494 | 43   | 0.872128255 | 0.927072 | 0.855858586 | -1 | 0.868306178 | 0.932907    | 0.864864865 | -1       |
| biological_process | photoreceptor cell maintenance                                                                                   | GO:0045494 | 16515 | 22   | 0.820900047 | 0.927314 | 0.877477477 | -1 | 1.031666035 | 0.398441    | 0.4         | -1       |
| biological_process | glutathione metabolic process                                                                                    | GO:0006749 | 16494 | 43   | 0.871464524 | 0.928113 | 0.74954955  | -1 | 0.839979496 | 0.965617    | 0.774774775 | -1       |
| biological_process | small molecule catabolic process                                                                                 | GO:0044282 | 16344 | 193  | 0.938767469 | 0.930851 | 0.8         | -1 | 0.903527425 | 0.990232    | 0.958585859 | -1       |
| biological_process | single-organism catabolic process                                                                                | GO:0044712 | 16344 | 193  | 0.938767469 | 0.930851 | 0.8         | -1 | 0.903527425 | 0.990232    | 0.958585859 | -1       |
| biological_process | regulation of fatty acid biosynthetic process                                                                    | GO:0042304 | 16515 | 22   | 0.817162087 | 0.931421 | 0.890090099 | -1 | 1.07452065  | 0.272331    | 0.21981982  | 0.489317 |
| molecular_function | mRNA 3'-UTR binding                                                                                              | GO:0003730 | 16841 | 20   | 0.807532245 | 0.932125 | 0.969369369 | -1 | 1.00880743  | 0.472799    | 0.500909091 | -1       |
| biological_process | cilium movement                                                                                                  | GO:0003341 | 16513 | 24   | 0.8234447   | 0.933102 | 0.767567568 | -1 | 0.804442944 | 0.951609    | 0.971171717 | -1       |
| molecular_function | NAD binding                                                                                                      | GO:0051287 | 16805 | 56   | 0.884514774 | 0.933117 | 0.807207207 | -1 | 0.781048757 | 0.997764    | 0.877477477 | -1       |
| biological_process | regulation of endocrine process                                                                                  | GO:0044060 | 16514 | 23   | 0.817114287 | 0.935784 | 0.954954955 | -1 | 0.911174655 | 0.769871    | 0.864864865 | -1       |
| biological_process | regulation of mRNA splicing, via spliceosome                                                                     | GO:0048024 | 16504 | 33   | 0.846541721 | 0.936807 | 0.879279279 | -1 | 1.015831009 | 0.437375    | 0.423423423 | -1       |
| cellular_component | nonmotile primary cilium                                                                                         | GO:0031513 | 16743 | 80   | 0.901520634 | 0.93691  | 0.944144444 | -1 | 1.06998096  | 0.138576    | 0.176576577 | 0.238715 |
| cellular_component | anaphase-promoting complex                                                                                       | GO:0005680 | 16801 | 22   | 0.810341723 | 0.938448 | 0.837837838 | -1 | 0.813340687 | 0.935429    | 0.78018018  | -1       |
| biological_process | acyl-CoA metabolic process                                                                                       | GO:0006637 | 16479 | 58   | 0.883001745 | 0.938963 | 0.855858586 | -1 | 0.872211512 | 0.954363    | 0.915315315 | -1       |
| biological_process | thioester metabolic process                                                                                      | GO:0035383 | 16479 | 58   | 0.883001745 | 0.938963 | 0.855858586 | -1 | 0.872211512 | 0.954363    | 0.915315315 | -1       |
| biological_process | ribonucleoside monophosphate metabolic process                                                                   | GO:0009161 | 16499 | 38   | 0.855181656 | 0.939202 | 0.935135135 | -1 | 0.936111967 | 0.752695    | 0.781981982 | -1       |
| biological_process | pyrimidine nucleoside metabolic process                                                                          | GO:0006213 | 16504 | 33   | 0.843529365 | 0.940444 | 0.798198198 | -1 | 0.857924177 | 0.921486    | 0.792792797 | -1       |
| biological_process | protein autoubiquitination                                                                                       | GO:0051865 | 16506 | 31   | 0.838451082 | 0.940558 | 0.913513514 | -1 | 0.957005421 | 0.660957    | 0.663063063 | -1       |
| molecular_function | ligase activity                                                                                                  | GO:0016874 | 16406 | 455  | 0.958201705 | 0.941283 | 0.774774775 | -1 | 1.01501197  | 0.286974    | 0.374774775 | -1       |
| molecular_function | copper ion binding                                                                                               | GO:0005507 | 16816 | 45   | 0.86523863  | 0.941553 | 0.864864865 | -1 | 0.853282746 | 0.956094    | 0.846846847 | -1       |
| biological_process | RNA localization                                                                                                 | GO:0006403 | 16444 | 93   | 0.905679988 | 0.942948 | 0.857657658 | -1 | 1.004315325 | 0.466666667 | 0.466666667 | -1       |
| cellular_component | photoreceptor connecting cilium                                                                                  | GO:0032391 | 16801 | 22   | 0.805121904 | 0.943438 | 0.908108108 | -1 | 1.006927874 | 0.          |             |          |

|                    |                                                                                      |            |       |      |             |          |              |    |              |             |             |           |
|--------------------|--------------------------------------------------------------------------------------|------------|-------|------|-------------|----------|--------------|----|--------------|-------------|-------------|-----------|
| molecular_function | small conjugating protein ligase activity                                            | GO:0019787 | 16614 | 247  | 0.941960029 | 0.944279 | 0.744144144  | -1 | 1.03076384   | 0.199444    | 0.293693694 | 0.375377  |
| biological_process | regulation of translation                                                            | GO:0006417 | 16367 | 170  | 0.929740654 | 0.944652 | 0.927927928  | -1 | 1.027049848  | 0.269629    | 0.185585586 | 0.485741  |
| biological_process | hydrogen peroxide metabolic process                                                  | GO:0042743 | 16517 | 20   | 0.793738269 | 0.945063 | 0.830630631  | -1 | 0.847946938  | 0.88072     | 0.738738739 | -1        |
| biological_process | ribonucleoprotein complex assembly                                                   | GO:0022618 | 16470 | 67   | 0.887440826 | 0.945106 | 0.9131513514 | -1 | 0.904265093  | 0.913106    | 0.893693694 | -1        |
| biological_process | maternal process involved in female pregnancy                                        | GO:0060135 | 16493 | 44   | 0.860802772 | 0.945365 | 0.927927928  | -1 | 0.98853657   | 0.952483    | 0.562126162 | -1        |
| biological_process | nucleoside diphosphate metabolic process                                             | GO:0009132 | 16506 | 31   | 0.833843887 | 0.945637 | 0.763963964  | -1 | 0.748858488  | 0.992331    | 0.855855856 | -1        |
| biological_process | maternal placenta development                                                        | GO:0001893 | 16513 | 24   | 0.809083786 | 0.947518 | 0.942342342  | -1 | 0.850433139  | 0.89798     | 0.841441441 | -1        |
| cellular_component | nucleoid                                                                             | GO:0009295 | 16789 | 34   | 0.839375573 | 0.947806 | 0.994594595  | -1 | 0.938404325  | 0.733278    | 0.753153153 | -1        |
| biological_process | vesicle fusion                                                                       | GO:0006906 | 16506 | 31   | 0.830824438 | 0.948776 | 0.983783784  | -1 | 0.813292908  | 0.964253    | 0.98018018  | -1        |
| biological_process | RNA metabolic process                                                                | GO:0016070 | 13276 | 3261 | 0.985176418 | 0.949174 | 0.628828829  | -1 | 1.029352005  | 0.000598242 | 0.203603604 | 0.0298366 |
| biological_process | isoprenoid biosynthetic process                                                      | GO:0008299 | 16513 | 24   | 0.806201526 | 0.95009  | 0.873873874  | -1 | 0.951065351  | 0.661144    | 0.598198198 | -1        |
| biological_process | natural killer cell activation                                                       | GO:0030101 | 16504 | 33   | 0.83401589  | 0.950862 | 0.873873874  | -1 | 0.990489837  | 0.537753    | 0.531531532 | -1        |
| biological_process | folic acid-containing compound metabolic process                                     | GO:0006760 | 16516 | 21   | 0.791726157 | 0.950963 | 0.846846847  | -1 | 0.748898242  | 0.976947    | 0.971711711 | -1        |
| biological_process | terpenoid metabolic process                                                          | GO:0006721 | 16495 | 42   | 0.851974328 | 0.951925 | 0.890090009  | -1 | 0.865904774  | 0.934121    | 0.825225225 | -1        |
| biological_process | ribonucleoprotein complex subunit organization                                       | GO:0071826 | 16465 | 72   | 0.886525222 | 0.952687 | 0.890090009  | -1 | 0.914440822  | 0.896219    | 0.859459459 | -1        |
| biological_process | cellular response to light stimulus                                                  | GO:0071482 | 16493 | 44   | 0.854538941 | 0.95289  | 0.992792793  | -1 | 0.958454235  | 0.683685    | 0.744144144 | -1        |
| cellular_component | microtubule organizing center                                                        | GO:0005815 | 16352 | 471  | 0.955924363 | 0.953578 | 0.789189189  | -1 | 1.016509163  | 0.264535    | 0.309909991 | 0.430707  |
| biological_process | base-excision repair                                                                 | GO:0006284 | 16508 | 29   | 0.819965936 | 0.953601 | 0.962162162  | -1 | 1.070086656  | 0.25647     | 0.324324324 | 0.467079  |
| biological_process | nucleotide-sugar metabolic process                                                   | GO:0009225 | 16509 | 28   | 0.816520508 | 0.953826 | 0.924324324  | -1 | 0.722809609  | 0.994501    | 0.996396396 | -1        |
| cellular_component | nuclear matrix                                                                       | GO:0013663 | 16750 | 73   | 0.886382618 | 0.954017 | 0.904504505  | -1 | 1.020426359  | 0.380972    | 0.342342342 | -1        |
| molecular_function | oxidoreductase activity, acting on the CH-CH group of donors                         | GO:0016627 | 16807 | 54   | 0.867394696 | 0.954541 | 0.918918919  | -1 | 1.0075564326 | 0.471732    | 0.531531532 | -1        |
| biological_process | oxidoreduction coenzyme metabolic process                                            | GO:0006733 | 16473 | 64   | 0.878232215 | 0.954547 | 0.904504505  | -1 | 0.77817444   | 0.998964    | 0.936936937 | -1        |
| biological_process | regulation of cyclin-dependent protein serine/threonine kinase activity              | GO:0000079 | 16476 | 61   | 0.87506857  | 0.954798 | 0.855855856  | -1 | 0.957365154  | 0.718332    | 0.715315315 | -1        |
| molecular_function | translation elongation factor activity                                               | GO:0003746 | 16838 | 23   | 0.795790374 | 0.955201 | 0.859459459  | -1 | 0.855105672  | 0.885791    | 0.76036036  | -1        |
| biological_process | nucleic acid transport                                                               | GO:0050657 | 16449 | 88   | 0.895795303 | 0.955223 | 0.891891892  | -1 | 1.002529184  | 0.483592    | 0.491891892 | -1        |
| biological_process | RNA transport                                                                        | GO:0050658 | 16449 | 88   | 0.895795303 | 0.955223 | 0.891891892  | -1 | 1.002529184  | 0.483592    | 0.491891892 | -1        |
| biological_process | establishment of RNA localization                                                    | GO:0051236 | 16449 | 88   | 0.895795303 | 0.955223 | 0.891891892  | -1 | 1.002529184  | 0.483592    | 0.491891892 | -1        |
| molecular_function | growth factor activity                                                               | GO:0008083 | 16745 | 116  | 0.909157675 | 0.955488 | 0.940540541  | -1 | 0.852799535  | 0.997071    | 0.996396396 | -1        |
| biological_process | RNA splicing, via transesterification reactions with bulged adenosine as nucleophile | GO:0000377 | 16457 | 80   | 0.889901968 | 0.956356 | 0.812612613  | -1 | 1.014536557  | 0.410722    | 0.427027027 | -1        |
| biological_process | mRNA splicing, via spliceosome                                                       | GO:0000398 | 16457 | 80   | 0.889901968 | 0.956356 | 0.812612613  | -1 | 1.014536557  | 0.410722    | 0.427027027 | -1        |
| biological_process | purine ribonucleoside triphosphate biosynthetic process                              | GO:0009206 | 16473 | 64   | 0.876758331 | 0.956469 | 0.747747748  | -1 | 0.770056744  | 0.999295    | 0.866666667 | -1        |
| molecular_function | DNA helicase activity                                                                | GO:0003678 | 16803 | 58   | 0.869529675 | 0.957652 | 0.841441441  | -1 | 1.012828922  | 0.432702    | 0.416216216 | -1        |
| molecular_function | translation regulator activity                                                       | GO:0045182 | 16839 | 22   | 0.787564796 | 0.957919 | 0.954954955  | -1 | 0.831574486  | 0.91454     | 0.909090991 | -1        |
| biological_process | amino sugar metabolic process                                                        | GO:0006040 | 16497 | 40   | 0.840406702 | 0.959982 | 0.893693694  | -1 | 0.831941322  | 0.967359    | 0.933333333 | -1        |
| biological_process | carboxylic acid metabolic process                                                    | GO:0019752 | 15877 | 660  | 0.961456514 | 0.959982 | 0.821621622  | -1 | 0.928067734  | 0.999456    | 0.971171171 | -1        |
| molecular_function | ribonucleoprotein complex binding                                                    | GO:0043021 | 16805 | 56   | 0.864931421 | 0.960257 | 0.917117117  | -1 | 0.891404742  | 0.920274    | 0.841441441 | -1        |
| molecular_function | heme binding                                                                         | GO:0020037 | 16727 | 134  | 0.912774516 | 0.960444 | 0.877477477  | -1 | 0.935319261  | 0.903572    | 0.828828829 | -1        |
| molecular_function | single-stranded DNA binding                                                          | GO:0003697 | 16805 | 56   | 0.864245178 | 0.961015 | 0.893693694  | -1 | 0.946270325  | 0.757292    | 0.789189189 | -1        |
| molecular_function | disulfide oxidoreductase activity                                                    | GO:0015036 | 16830 | 31   | 0.817245636 | 0.961144 | 0.913513514  | -1 | 0.868385663  | 0.898042    | 0.832424242 | -1        |
| biological_process | purine nucleoside triphosphate biosynthetic process                                  | GO:0009145 | 16472 | 65   | 0.873530527 | 0.961606 | 0.758585859  | -1 | 0.763925245  | 0.999522    | 0.875657567 | -1        |
| cellular_component | mitochondrial nucleoid                                                               | GO:0042645 | 16790 | 33   | 0.822242117 | 0.961676 | 0.996396396  | -1 | 0.943638023  | 0.712732    | 0.72972973  | -1        |
| biological_process | cellular amino acid catabolic process                                                | GO:0009063 | 16461 | 76   | 0.881287489 | 0.963813 | 0.935135135  | -1 | 0.972404899  | 0.661921    | 0.691891892 | -1        |
| biological_process | ribonucleoside triphosphate biosynthetic process                                     | GO:0009201 | 16468 | 69   | 0.875290555 | 0.963921 | 0.771171171  | -1 | 0.793111515  | 0.998573    | 0.855855856 | -1        |
| molecular_function | acid-amino acid ligase activity                                                      | GO:0016881 | 16574 | 287  | 0.939188442 | 0.964054 | 0.798198198  | -1 | 1.02145086   | 0.262764    | 0.326126126 | 0.454489  |
| molecular_function | coenzyme binding                                                                     | GO:0050662 | 16652 | 209  | 0.928074761 | 0.965038 | 0.902702703  | -1 | 0.917286362  | 0.981426    | 0.776576577 | -1        |
| cellular_component | nucleolar part                                                                       | GO:0044452 | 16798 | 25   | 0.790076506 | 0.965576 | 0.967567568  | -1 | 0.671160608  | 0.997814    | 0.972972973 | -1        |
| cellular_function  | cofactor binding                                                                     | GO:0048037 | 16573 | 288  | 0.938332517 | 0.966255 | 0.884684685  | -1 | 0.918741281  | 0.992009    | 0.828828829 | -1        |
| cellular_component | nuclear ubiquitin ligase complex                                                     | GO:0000152 | 16797 | 26   | 0.792453515 | 0.96671  | 0.884684685  | -1 | 0.857237375  | 0.896504    | 0.745945946 | -1        |
| cellular_component | transcription factor TFIID complex                                                   | GO:0005669 | 16802 | 21   | 0.768590635 | 0.966968 | 0.98018018   | -1 | 0.940822007  | 0.680838    | 0.634234234 | -1        |
| biological_process | protein K11-linked ubiquitination                                                    | GO:0070979 | 16512 | 25   | 0.787415839 | 0.967301 | 0.947747748  | -1 | 0.818882868  | 0.941769    | 0.888288288 | -1        |
| biological_process | RNA methylation                                                                      | GO:0001510 | 16515 | 22   | 0.772669366 | 0.967711 | 0.927927928  | -1 | 0.991411591  | 0.527852    | 0.536936937 | -1        |
| cellular_component | catalytic step 2 spliceosome                                                         | GO:0071013 | 16749 | 74   | 0.876166758 | 0.967787 | 0.922525253  | -1 | 1.001319007  | 0.492091    | 0.526126126 | -1        |
| molecular_function | transferase activity, transferring alkyl or aryl (other than methyl) groups          | GO:0016765 | 16809 | 52   | 0.851640099 | 0.968827 | 0.809090909  | -1 | 0.810678603  | 0.991067    | 0.772972973 | -1        |
| biological_process | RNA splicing, via transesterification reactions                                      | GO:0000375 | 16455 | 82   | 0.881766723 | 0.968497 | 0.836036036  | -1 | 1.001507614  | 0.490569    | 0.506306306 | -1        |
| biological_process | cellular amino acid biosynthetic process                                             | GO:0008652 | 16438 | 99   | 0.892016573 | 0.969026 | 0.866666667  | -1 | 0.900947366  | 0.956578    | 0.823423423 | -1        |
| biological_process | pteridine-containing compound metabolic process                                      | GO:0042558 | 16510 | 27   | 0.792556557 | 0.969156 | 0.868468468  | -1 | 0.797734466  | 0.965771    | 0.845045045 | -1        |
| biological_process | cilium assembly                                                                      | GO:0042384 | 16458 | 79   | 0.878351355 | 0.969766 | 0.787387387  | -1 | 0.995173606  | 0.529711    | 0.484684685 | -1        |
| biological_process | cilium organization                                                                  | GO:0044782 | 16458 | 79   | 0.878351355 | 0.969766 | 0.787387387  | -1 | 0.995173606  | 0.529711    | 0.484684685 | -1        |
| biological_process | pyrimidine-containing compound biosynthetic process                                  | GO:0072528 | 16508 | 29   | 0.798777464 | 0.969852 | 0.845045045  | -1 | 0.885428765  | 0.857615    | 0.718918919 | -1        |
| biological_process | pyrimidine ribonucleotide biosynthetic process                                       | GO:0009220 | 16513 | 24   | 0.778623533 | 0.969994 | 0.816216216  | -1 | 0.791140203  | 0.961937    | 0.834234234 | -1        |
| biological_process | pyrimidine ribonucleoside biosynthetic process                                       | GO:0046132 | 16513 | 24   | 0.778623533 | 0.969994 | 0.816216216  | -1 | 0.791140203  | 0.961937    | 0.834234234 | -1        |
| biological_process | pyrimidine nucleoside biosynthetic process                                           | GO:0046134 | 16513 | 24   | 0.778623533 | 0.969994 | 0.816216216  | -1 | 0.791140203  | 0.961937    | 0.834234234 | -1        |
| biological_process | tricarboxylic acid cycle                                                             | GO:0006099 | 16511 | 26   | 0.786550137 | 0.970401 | 0.989189189  | -1 | 0.806699603  | 0.95624     | 0.859459459 | -1        |
| biological_process | protein monoubiquitination                                                           | GO:0006513 | 16500 | 37   | 0.821083082 | 0.970435 | 0.951351351  | -1 | 0.983167338  | 0.570481    | 0.592792793 | -1        |
| biological_process | cofactor biosynthetic process                                                        | GO:0051188 | 16424 | 113  | 0.897700633 | 0.970629 | 0.906306306  | -1 | 0.888295606  | 0.980486    | 0.790990991 | -1        |
| biological_process | pyrimidine ribonucleotide metabolic process                                          | GO:0009218 | 16512 | 25   | 0.780590323 | 0.971394 | 0.828828829  | -1 | 0.783691071  | 0.96959     | 0.852252252 | -1        |
| biological_process | DNA-dependent DNA replication                                                        | GO:0006261 | 16470 | 67   | 0.866015652 | 0.971514 | 0.787387387  | -1 | 0.989204086  | 0.560972    | 0.578378378 | -1        |
| cellular_component | cilium                                                                               | GO:0005929 | 16592 | 231  | 0.928070685 | 0.971719 | 0.756756757  | -1 | 0.993016077  | 0.573456    | 0.590990991 | -1        |
| biological_process | nitrogen compound metabolic process                                                  | GO:0006807 | 11451 | 5086 | 0.987150591 | 0.971795 | 0.677477477  | -1 | 1.011002125  | 0.0512724   | 0.246846847 | 0.185758  |
| molecular_function | endodeoxyribonuclease activity                                                       | GO:0004520 | 16833 | 28   | 0.789747528 | 0.973115 | 0.974774775  | -1 | 0.878544033  | 0.867392    | 0.828828829 | -1        |
| molecular_function | helicase activity                                                                    | GO:0004386 | 16692 | 169  | 0.913535377 | 0.974815 | 0.769369369  | -1 | 1.178035606  | 2.80E-05    | 0.052252252 | 0         |
| molecular_function | protein disulfide oxidoreductase activity                                            | GO:0015035 | 16836 | 25   | 0.77410084  | 0.974878 | 0.944144144  | -1 | 0.831413176  | 0.928014    | 0.857657658 | -1        |
| biological_process | RNA modification                                                                     | GO:0009451 | 16472 | 65   | 0.859658466 | 0.97522  | 0.945494594  | -1 | 0.963468219  | 0.695401    | 0.704504505 | -1        |
| biological_process | cilium morphogenesis                                                                 | GO:0060271 | 16429 | 108  | 0.890635299 | 0.975874 | 0.807207207  | -1 | 1.010665661  | 0.423657    | 0.405405405 | -1        |
| molecular_function | cysteine-type endopeptidase inhibitor activity                                       | GO:0004869 | 16826 | 35   | 0.805727679 | 0.976861 | 0.983783784  | -1 | 0.890828637  | 0.86862     | 0.864864865 | -1        |
| cellular_component | small nuclear ribonucleoprotein complex                                              | GO:0030532 | 16801 | 22   | 0.753226316 | 0.977582 | 0.909090991  | -1 | 0.855293763  | 0.880288    | 0.778378378 | -1        |
| biological_process | peroxisome organization                                                              | GO:0007031 | 16506 | 31   | 0.791735445 | 0.977807 | 0.976576577  | -1 | 0.883122545  | 0.870396    | 0.834234234 | -1        |
| cellular_component | cullin-RING ubiquitin ligase complex                                                 | GO:0031461 | 16739 | 84   | 0.873476286 | 0.977975 | 0.983783784  | -1 | 0.946072446  | 0.852252252 | 0.852252252 | -1        |
| cellular_component | organelle envelope lumen                                                             | GO:003     |       |      |             |          |              |    |              |             |             |           |

|                    |                                                                         |            |       |       |             |          |             |    |             |            |             |           |
|--------------------|-------------------------------------------------------------------------|------------|-------|-------|-------------|----------|-------------|----|-------------|------------|-------------|-----------|
| biological_process | aspartate family amino acid biosynthetic process                        | GO:0009067 | 16517 | 20    | 0.737600702 | 0.979018 | 0.998198198 | -1 | 0.925090741 | 0.719265   | 0.762162162 | -1        |
| biological_process | meiosis                                                                 | GO:0007126 | 16401 | 136   | 0.899082105 | 0.979674 | 0.864864865 | -1 | 1.026765297 | 0.2936     | 0.34954955  | -1        |
| biological_process | proton transport                                                        | GO:0015992 | 16470 | 67    | 0.855550348 | 0.979925 | 0.769369369 | -1 | 0.766151236 | 0.999554   | 0.805405405 | -1        |
| molecular_function | carbon-oxygen lyase activity                                            | GO:0016835 | 16804 | 57    | 0.842255625 | 0.980602 | 0.834234234 | -1 | 0.832612843 | 0.985834   | 0.945945946 | -1        |
| biological_process | nucleoside triphosphate biosynthetic process                            | GO:0009142 | 16464 | 73    | 0.860490196 | 0.980738 | 0.812612613 | -1 | 0.805170343 | 0.998072   | 0.854054054 | -1        |
| biological_process | pyrimidine nucleoside triphosphate metabolic process                    | GO:0009147 | 16516 | 21    | 0.737968111 | 0.981294 | 0.846846847 | -1 | 0.7860365   | 0.955383   | 0.830630631 | -1        |
| biological_process | mitochondrial membrane organization                                     | GO:0007006 | 16491 | 46    | 0.822711428 | 0.981496 | 0.972972973 | -1 | 0.824078508 | 0.980755   | 0.848648649 | -1        |
| molecular_function | endonuclease activity                                                   | GO:0004519 | 16780 | 81    | 0.866453138 | 0.981551 | 0.891891892 | -1 | 0.774735417 | 0.999784   | 0.983783784 | -1        |
| biological_process | hydrogen transport                                                      | GO:0006818 | 16469 | 68    | 0.853851007 | 0.981774 | 0.778378378 | -1 | 0.770641296 | 0.999486   | 0.807207207 | -1        |
| molecular_function | monocarboxylic acid binding                                             | GO:0033293 | 16829 | 32    | 0.785335131 | 0.982327 | 0.936936937 | -1 | 0.923504624 | 0.77345    | 0.8         | -1        |
| biological_process | alpha-amino acid catabolic process                                      | GO:1901606 | 16472 | 65    | 0.849010692 | 0.982688 | 0.953153153 | -1 | 0.972039649 | 0.652207   | 0.661261261 | -1        |
| biological_process | recombinational repair                                                  | GO:0000725 | 16492 | 45    | 0.817863259 | 0.982965 | 0.926126126 | -1 | 0.980299132 | 0.590673   | 0.625225225 | -1        |
| biological_process | pyrimidine nucleotide biosynthetic process                              | GO:0006221 | 16509 | 28    | 0.767231262 | 0.983631 | 0.868468468 | -1 | 0.847522805 | 0.919056   | 0.763963964 | -1        |
| biological_process | cellular amino acid metabolic process                                   | GO:0006520 | 16214 | 323   | 0.932045514 | 0.98368  | 0.915315315 | -1 | 0.919495335 | 0.994313   | 0.953153153 | -1        |
| biological_process | pigment metabolic process                                               | GO:0042440 | 16483 | 54    | 0.831575832 | 0.984116 | 0.924324324 | -1 | 0.905182092 | 0.886649   | 0.74954955  | -1        |
| cellular_component | integral to mitochondrial membrane                                      | GO:0032592 | 16792 | 31    | 0.777476527 | 0.984143 | 0.958558559 | -1 | 0.824168682 | 0.955179   | 0.812612613 | -1        |
| biological_process | double-strand break repair                                              | GO:0006302 | 16438 | 99    | 0.875272721 | 0.984462 | 0.956756757 | -1 | 1.057340691 | 0.160813   | 0.29009009  | 0.351062  |
| biological_process | protein peptidyl-prolyl isomerization                                   | GO:0000413 | 16517 | 20    | 0.72169788  | 0.984502 | 0.891891892 | -1 | 0.826559758 | 0.910584   | 0.724324324 | -1        |
| biological_process | alpha-amino acid metabolic process                                      | GO:1901605 | 16352 | 185   | 0.908828876 | 0.98462  | 0.92972973  | -1 | 0.957588161 | 0.84251    | 0.854054054 | -1        |
| molecular_function | DNA-dependent ATPase activity                                           | GO:0008094 | 16804 | 57    | 0.834695801 | 0.984821 | 0.866666667 | -1 | 0.997380816 | 0.513694   | 0.495495495 | -1        |
| biological_process | nucleoside monophosphate metabolic process                              | GO:0009123 | 16494 | 43    | 0.809377567 | 0.98492  | 0.972972973 | -1 | 0.948603547 | 0.720585   | 0.70990991  | -1        |
| molecular_function | ATP-dependent DNA helicase activity                                     | GO:0004003 | 16837 | 24    | 0.741984423 | 0.985774 | 0.917117117 | -1 | 0.877550674 | 0.850787   | 0.902702703 | -1        |
| molecular_function | oxidoreductase activity, acting on a sulfur group of donors             | GO:0016667 | 16811 | 50    | 0.819362403 | 0.986645 | 0.974774775 | -1 | 0.890765604 | 0.90986    | 0.832432432 | -1        |
| biological_process | organic acid catabolic process                                          | GO:0016054 | 16391 | 146   | 0.894605183 | 0.986645 | 0.926126126 | -1 | 0.921227231 | 0.951141   | 0.897297297 | -1        |
| biological_process | carboxylic acid catabolic process                                       | GO:0046395 | 16391 | 146   | 0.894605183 | 0.986645 | 0.926126126 | -1 | 0.921227231 | 0.951141   | 0.897297297 | -1        |
| molecular_function | nuclease activity                                                       | GO:0004518 | 16730 | 131   | 0.886854879 | 0.987835 | 0.942342342 | -1 | 0.855259357 | 0.998016   | 0.944144144 | -1        |
| biological_process | double-strand break repair via homologous recombination                 | GO:0000724 | 16493 | 44    | 0.803893238 | 0.987972 | 0.953153153 | -1 | 0.999390397 | 0.502819   | 0.542342342 | -1        |
| molecular_function | ATP-dependent helicase activity                                         | GO:0008026 | 16749 | 112   | 0.875966384 | 0.988733 | 0.879279279 | -1 | 1.132227456 | 0.00751096 | 0.126126126 | 0         |
| molecular_function | purine NTP-dependent helicase activity                                  | GO:0070035 | 16749 | 112   | 0.875966384 | 0.988733 | 0.879279279 | -1 | 1.132227456 | 0.00751096 | 0.126126126 | 0         |
| biological_process | coenzyme biosynthetic process                                           | GO:0009108 | 16456 | 81    | 0.853885171 | 0.988797 | 0.985585586 | -1 | 0.822663295 | 0.997209   | 0.888288288 | -1        |
| molecular_function | peroxidase activity                                                     | GO:0004601 | 16827 | 34    | 0.773427693 | 0.989009 | 0.796396396 | -1 | 0.672319672 | 0.999538   | 0.908108108 | -1        |
| molecular_function | oxidoreductase activity, acting on peroxide as acceptor                 | GO:0016684 | 16827 | 34    | 0.773427693 | 0.989009 | 0.796396396 | -1 | 0.672319672 | 0.999538   | 0.908108108 | -1        |
| biological_process | organic cyclic compound metabolic process                               | GO:1901360 | 11697 | 4840  | 0.983980556 | 0.989151 | 0.697297297 | -1 | 0.011950293 | 0.0434675  | 0.245045045 | 0.174515  |
| biological_process | isoprenoid metabolic process                                            | GO:0006720 | 16477 | 60    | 0.828498734 | 0.989423 | 0.920720721 | -1 | 0.867250021 | 0.962817   | 0.807207207 | -1        |
| biological_process | macromolecule biosynthetic process                                      | GO:0009059 | 12827 | 3710  | 0.980657457 | 0.989766 | 0.818018018 | -1 | 0.005091994 | 0.271013   | 0.376576577 | 0.487779  |
| biological_process | regulation of RNA splicing                                              | GO:0043484 | 16475 | 62    | 0.828152186 | 0.990568 | 0.936936937 | -1 | 1.03167632  | 0.33259    | 0.403603604 | -1        |
| molecular_function | unfolded protein binding                                                | GO:0051082 | 16770 | 91    | 0.857224217 | 0.990998 | 0.863063063 | -1 | 0.909456919 | 0.93321    | 0.821621622 | -1        |
| molecular_function | transferase activity, transferring one-carbon groups                    | GO:0016741 | 16675 | 186   | 0.899484431 | 0.991522 | 0.992792793 | -1 | 0.986790296 | 0.623161   | 0.634234234 | -1        |
| biological_process | response to DNA damage stimulus                                         | GO:0006974 | 16023 | 514   | 0.940064277 | 0.991604 | 0.884684685 | -1 | 1.009356641 | 0.35454    | 0.371171171 | -1        |
| biological_process | DNA metabolic process                                                   | GO:0006259 | 15773 | 764   | 0.951187129 | 0.991646 | 0.753153153 | -1 | 0.990781936 | 0.674374   | 0.601801802 | -1        |
| cellular_component | intracellular organelle lumen                                           | GO:0070013 | 14840 | 1983  | 0.970721934 | 0.991897 | 0.809090909 | -1 | 1.007284518 | 0.274822   | 0.363963964 | 0.447063  |
| biological_process | establishment of protein localization to organelle                      | GO:0072594 | 16445 | 92    | 0.855372812 | 0.992014 | 0.992792793 | -1 | 0.848196956 | 0.994283   | 0.926126126 | -1        |
| cellular_component | organelle lumen                                                         | GO:0043233 | 14835 | 1988  | 0.970678369 | 0.992056 | 0.814414414 | -1 | 1.00624605  | 0.303697   | 0.38018018  | 0.480657  |
| biological_process | translational elongation                                                | GO:0006414 | 16499 | 38    | 0.773723054 | 0.992216 | 0.8         | -1 | 0.727841328 | 0.998189   | 0.875675676 | -1        |
| molecular_function | deoxyribonuclease activity                                              | GO:0004536 | 16824 | 37    | 0.770538437 | 0.992246 | 0.956756757 | -1 | 0.842499425 | 0.95167    | 0.805405405 | -1        |
| molecular_function | antioxidant activity                                                    | GO:0016209 | 16803 | 58    | 0.815801405 | 0.992534 | 0.83963964  | -1 | 0.74152498  | 0.999682   | 0.920720721 | -1        |
| cellular_component | DNA-directed RNA polymerase complex                                     | GO:0000428 | 16730 | 93    | 0.854054319 | 0.99275  | 0.992792793 | -1 | 0.931275075 | 0.875169   | 0.8         | -1        |
| cellular_component | RNA polymerase complex                                                  | GO:0030880 | 16730 | 93    | 0.854054319 | 0.99275  | 0.992792793 | -1 | 0.931275075 | 0.875169   | 0.8         | -1        |
| cellular_component | nuclear DNA-directed RNA polymerase complex                             | GO:005029  | 16730 | 93    | 0.854054319 | 0.99275  | 0.992792793 | -1 | 0.931275075 | 0.875169   | 0.8         | -1        |
| biological_process | apoptotic nuclear changes                                               | GO:0030262 | 16513 | 24    | 0.709670993 | 0.993158 | 0.913513514 | -1 | 0.812978869 | 0.943876   | 0.927927928 | -1        |
| biological_process | chromosome condensation                                                 | GO:0030261 | 16514 | 23    | 0.702558233 | 0.993293 | 0.866666667 | -1 | 0.967871673 | 0.605312   | 0.578378378 | -1        |
| cellular_component | mitochondrial intermembrane space                                       | GO:0005758 | 16780 | 43    | 0.782420883 | 0.993329 | 0.918918919 | -1 | 0.726385178 | 0.99907    | 0.845045045 | -1        |
| biological_process | aspartate family amino acid metabolic process                           | GO:0009066 | 16505 | 32    | 0.747349495 | 0.993393 | 0.992792793 | -1 | 0.895576797 | 0.847131   | 0.875675676 | -1        |
| biological_process | pyrimidine nucleotide metabolic process                                 | GO:0006220 | 16504 | 33    | 0.750857268 | 0.993459 | 0.881081081 | -1 | 0.819302252 | 0.964055   | 0.796396396 | -1        |
| biological_process | organic substance metabolic process                                     | GO:0071704 | 8428  | 8109  | 0.988610536 | 0.993596 | 0.884684685 | -1 | 0.998686133 | 0.613209   | 0.628828829 | -1        |
| molecular_function | methyltransferase activity                                              | GO:0008168 | 16682 | 179   | 0.893086675 | 0.993629 | 0.994594595 | -1 | 0.990452869 | 0.588001   | 0.601801802 | -1        |
| cellular_component | proteasome accessory complex                                            | GO:0022624 | 16801 | 22    | 0.692063658 | 0.99385  | 0.972972973 | -1 | 0.766443372 | 0.971201   | 0.83963964  | -1        |
| molecular_function | isoprenoid binding                                                      | GO:0019840 | 16841 | 20    | 0.669654088 | 0.994773 | 0.954954955 | -1 | 0.689515327 | 0.991948   | 0.94954955  | -1        |
| molecular_function | rRNA binding                                                            | GO:0019843 | 16827 | 34    | 0.746667191 | 0.994785 | 0.772972973 | -1 | 0.668820678 | 0.999593   | 0.843243243 | -1        |
| biological_process | cellular aromatic compound metabolic process                            | GO:0006725 | 11842 | 4695  | 0.981734293 | 0.994799 | 0.695495495 | -1 | 1.013434715 | 0.0297912  | 0.245045045 | 0.143039  |
| cellular_component | microtubule basal body                                                  | GO:0005932 | 16758 | 65    | 0.824949777 | 0.99519  | 0.935135135 | -1 | 1.054925765 | 0.2211     | 0.21981982  | 0.362923  |
| biological_process | DNA catabolic process                                                   | GO:0006308 | 16507 | 30    | 0.713919035 | 0.995625 | 0.951351351 | -1 | 0.990780079 | 0.534903   | 0.558585859 | -1        |
| cellular_component | DNA-directed RNA polymerase II, holoenzyme                              | GO:0016591 | 16736 | 87    | 0.838004178 | 0.995655 | 0.992792793 | -1 | 0.931671731 | 0.865809   | 0.778378378 | -1        |
| biological_process | cellular macromolecule biosynthetic process                             | GO:0034645 | 12911 | 3626  | 0.977667742 | 0.995814 | 0.841441441 | -1 | 1.004692791 | 0.289987   | 0.392792793 | -1        |
| biological_process | cellular nitrogen compound metabolic process                            | GO:0034641 | 11731 | 4806  | 0.981377211 | 0.996041 | 0.740540541 | -1 | 1.010216675 | 0.0726791  | 0.282882883 | 0.22611   |
| biological_process | heterocycle metabolic process                                           | GO:0046483 | 11865 | 4672  | 0.98097619  | 0.996085 | 0.713513514 | -1 | 1.014349524 | 0.022474   | 0.236036036 | 0.12883   |
| biological_process | oxidation-reduction process                                             | GO:0055114 | 15842 | 695   | 0.942406534 | 0.996397 | 0.771171171 | -1 | 0.874460762 | 1          | 1           | -1        |
| biological_process | execution phase of apoptosis                                            | GO:0097194 | 16510 | 27    | 0.701256001 | 0.996438 | 0.94954955  | -1 | 0.859697468 | 0.896856   | 0.861261261 | -1        |
| molecular_function | isomerase activity                                                      | GO:0016853 | 16729 | 132   | 0.865159078 | 0.99647  | 0.933333333 | -1 | 0.898578335 | 0.978631   | 0.792792793 | -1        |
| biological_process | mitochondrial transport                                                 | GO:0006839 | 16461 | 76    | 0.821746585 | 0.996511 | 0.976576577 | -1 | 0.814412574 | 0.997515   | 0.85045045  | -1        |
| biological_process | cellular component disassembly involved in execution phase of apoptosis | GO:0006921 | 16512 | 25    | 0.68761142  | 0.996611 | 0.947747748 | -1 | 0.859937545 | 0.887622   | 0.877477477 | -1        |
| cellular_component | intracellular part                                                      | GO:0044424 | 6242  | 10581 | 0.990730828 | 0.996651 | 0.832432432 | -1 | 0.998062809 | 0.714605   | 0.565765766 | -1        |
| cellular_component | nuclear part                                                            | GO:0044428 | 14745 | 2078  | 0.967756148 | 0.99673  | 0.767567568 | -1 | 1.022040652 | 0.0315222  | 0.144144144 | 0.0352529 |
| biological_process | nucleobase-containing compound metabolic process                        | GO:0006139 | 11980 | 4557  | 0.980197072 | 0.996746 | 0.693693694 | -1 | 1.015134447 | 0.0188305  | 0.243243243 | 0.116582  |
| biological_process | primary metabolic process                                               | GO:0044238 | 8677  | 7860  | 0.987050757 | 0.996983 | 0.893693694 | -1 | 0.998294851 | 0.641363   | 0.63963964  | -1        |
| cellular_component | organelle                                                               | GO:0043226 | 7521  | 9302  | 0.989009588 | 0.996985 | 0.877477477 | -1 | 1.000675005 | 0.433084   | 0.495495495 | -1        |
| cellular_component | membrane-enclosed lumen                                                 | GO:0031974 | 14787 | 2036  | 0.966997802 | 0.997031 | 0.83963964  | -1 | 1.000529999 | 0.482342   | 0.517117117 | -1        |
| molecular_function | peptidyl-prolyl cis-trans isomerase activity                            | GO:0003755 | 16825 | 36    | 0.733615831 | 0.997209 | 0.918918919 | -1 | 0.824032868 | 0.96643    | 0.78018018  | -1        |
| biological_process | purine nucleoside biosynthetic process                                  | GO:0042451 | 16442 | 95    | 0.835900956 | 0.997269 | 0.924324324 |    |             |            |             |           |

|                    |                                                                                     |            |       |       |             |          |             |    |              |           |             |          |
|--------------------|-------------------------------------------------------------------------------------|------------|-------|-------|-------------|----------|-------------|----|--------------|-----------|-------------|----------|
| cellular_component | ubiquitin ligase complex                                                            | GO:0000151 | 16687 | 136   | 0.862035791 | 0.99743  | 0.978378378 | -1 | 0.981144411  | 0.648914  | 0.69009009  | -1       |
| molecular_function | transferase activity, transferring pentosyl groups                                  | GO:0016763 | 16818 | 43    | 0.753355349 | 0.997484 | 0.992792793 | -1 | 1.124502489  | 0.0784022 | 0.052252252 | 0.136518 |
| biological_process | protein targeting to mitochondrion                                                  | GO:0006626 | 16502 | 35    | 0.724726413 | 0.997627 | 0.969369369 | -1 | 0.666260003  | 0.999691  | 0.920720721 | -1       |
| molecular_function | fatty-acyl-CoA binding                                                              | GO:0000062 | 16839 | 22    | 0.649082267 | 0.997833 | 0.98018018  | -1 | 0.757227601  | 0.97579   | 0.906306306 | -1       |
| biological_process | organic substance biosynthetic process                                              | GO:1901576 | 12120 | 4417  | 0.978604455 | 0.997996 | 0.933333333 | -1 | 0.995661708  | 0.720375  | 0.645045045 | -1       |
| molecular_function | cis-trans isomerase activity                                                        | GO:0016859 | 16823 | 38    | 0.727772036 | 0.998193 | 0.931531532 | -1 | 0.7932978    | 0.986432  | 0.816216216 | -1       |
| biological_process | macromolecule metabolic process                                                     | GO:0043170 | 9987  | 6550  | 0.983824927 | 0.998241 | 0.809090909 | -1 | 1.006506978  | 0.12033   | 0.23963964  | 0.294462 |
| biological_process | cellular biosynthetic process                                                       | GO:0044249 | 12186 | 4351  | 0.977722688 | 0.998489 | 0.926126126 | -1 | 0.995441702  | 0.728115  | 0.645045045 | -1       |
| cellular_component | intracellular organelle                                                             | GO:0043229 | 7559  | 9264  | 0.988041301 | 0.998532 | 0.879279279 | -1 | 1.000482157  | 0.452365  | 0.511711712 | -1       |
| molecular_function | nucleobase-containing compound kinase activity                                      | GO:0019205 | 16822 | 39    | 0.724822473 | 0.998559 | 0.904504505 | -1 | 0.783461417  | 0.990487  | 0.845243243 | -1       |
| cellular_component | membrane-bounded organelle                                                          | GO:0043227 | 8410  | 8413  | 0.986501111 | 0.998791 | 0.890090909 | -1 | 1.001682659  | 0.352737  | 0.473873874 | -1       |
| biological_process | cellular respiration                                                                | GO:0045333 | 16452 | 85    | 0.809549323 | 0.998853 | 0.963963964 | -1 | 0.726434936  | 0.999994  | 0.985585586 | -1       |
| biological_process | biosynthetic process                                                                | GO:0009058 | 12048 | 4489  | 0.977192045 | 0.999038 | 0.947747748 | -1 | 0.994013429  | 0.792277  | 0.684684685 | -1       |
| biological_process | protein folding                                                                     | GO:0006457 | 16380 | 157   | 0.857221844 | 0.999076 | 0.902702703 | -1 | 0.881762975  | 0.995037  | 0.879279279 | -1       |
| biological_process | respiratory electron transport chain                                                | GO:0022904 | 16500 | 37    | 0.696504711 | 0.999316 | 1           | -1 | 0.577329149  | 0.999996  | 0.998198198 | -1       |
| biological_process | nucleic acid metabolic process                                                      | GO:0090304 | 12785 | 3752  | 0.973418846 | 0.999331 | 0.713513514 | -1 | 0.1016715929 | 0.0218752 | 0.277477477 | 0.127288 |
| biological_process | nucleoside biosynthetic process                                                     | GO:0009163 | 16429 | 108   | 0.822061237 | 0.999345 | 0.953153153 | -1 | 0.834128884  | 0.998631  | 0.857657658 | -1       |
| biological_process | ribonucleoside biosynthetic process                                                 | GO:0042455 | 16429 | 108   | 0.822061237 | 0.999345 | 0.953153153 | -1 | 0.834128884  | 0.998631  | 0.857657658 | -1       |
| biological_process | glycosyl compound biosynthetic process                                              | GO:1901659 | 16429 | 108   | 0.822061237 | 0.999345 | 0.953153153 | -1 | 0.834128884  | 0.998631  | 0.857657658 | -1       |
| molecular_function | electron carrier activity                                                           | GO:0009055 | 16732 | 129   | 0.836475192 | 0.999338 | 0.947747748 | -1 | 0.814878064  | 0.999872  | 0.947747748 | -1       |
| cellular_component | intracellular organelle part                                                        | GO:0044446 | 11625 | 5198  | 0.97841874  | 0.999407 | 0.927927928 | -1 | 0.996776427  | 0.685914  | 0.581981982 | -1       |
| biological_process | metabolic process                                                                   | GO:0008152 | 7858  | 8679  | 0.98611031  | 0.999428 | 0.951351351 | -1 | 0.993046702  | 0.948277  | 0.809090909 | -1       |
| cellular_component | organelle part                                                                      | GO:0044422 | 11536 | 5287  | 0.978584895 | 0.999438 | 0.936936937 | -1 | 0.998587494  | 0.585149  | 0.551351351 | -1       |
| biological_process | mitochondrion organization                                                          | GO:0007005 | 16321 | 216   | 0.872107761 | 0.999476 | 0.926126126 | -1 | 0.860910168  | 0.999818  | 0.848648649 | -1       |
| biological_process | cofactor metabolic process                                                          | GO:0051186 | 16315 | 222   | 0.873846263 | 0.999477 | 0.969369369 | -1 | 0.870539644  | 0.999616  | 0.852252252 | -1       |
| cellular_component | intracellular membrane-bounded organelle                                            | GO:0043231 | 8445  | 8378  | 0.985257356 | 0.999515 | 0.900909091 | -1 | 1.001640308  | 0.356883  | 0.475675676 | -1       |
| molecular_function | 4 iron, 4 sulfur cluster binding                                                    | GO:0051539 | 16825 | 36    | 0.681882117 | 0.999533 | 0.985585586 | -1 | 0.764612569  | 0.992836  | 0.886486486 | -1       |
| biological_process | coenzyme metabolic process                                                          | GO:0006732 | 16358 | 179   | 0.856023607 | 0.999603 | 0.983783784 | -1 | 0.829249223  | 0.999965  | 0.936936937 | -1       |
| biological_process | generation of precursor metabolites and energy                                      | GO:0006091 | 16248 | 289   | 0.8866304   | 0.999621 | 0.879279279 | -1 | 0.835725133  | 0.999999  | 0.895495495 | -1       |
| cellular_component | proton-transporting two-sector ATPase complex, proton-transporting domain           | GO:0033177 | 16793 | 30    | 0.642614072 | 0.999655 | 0.841441441 | -1 | 0.620209558  | 0.999845  | 0.78018018  | -1       |
| biological_process | protein localization to mitochondrion                                               | GO:0070585 | 16496 | 41    | 0.693895741 | 0.999662 | 0.990990991 | -1 | 0.722972996  | 0.998952  | 0.882882883 | -1       |
| biological_process | establishment of protein localization to mitochondrion                              | GO:0072655 | 16497 | 40    | 0.68880383  | 0.999679 | 0.990990991 | -1 | 0.701432364  | 0.999471  | 0.904504505 | -1       |
| biological_process | intracellular protein transmembrane transport                                       | GO:0065002 | 16504 | 33    | 0.656950179 | 0.999683 | 0.996396396 | -1 | 0.699655536  | 0.998612  | 0.854054054 | -1       |
| biological_process | protein transmembrane transport                                                     | GO:0071806 | 16504 | 33    | 0.656950179 | 0.999683 | 0.996396396 | -1 | 0.699655536  | 0.998612  | 0.854054054 | -1       |
| biological_process | DNA recombination                                                                   | GO:0006310 | 16352 | 185   | 0.85564406  | 0.999687 | 0.926126126 | -1 | 0.978277682  | 0.996646  | 0.666666667 | -1       |
| cellular_component | U12-type spliceosomal complex                                                       | GO:0005689 | 16800 | 23    | 0.585979971 | 0.999711 | 0.962162162 | -1 | 0.633794713  | 0.998833  | 0.877477477 | -1       |
| biological_process | cellular macromolecule metabolic process                                            | GO:0044260 | 10608 | 5929  | 0.979224835 | 0.99973  | 0.828828829 | -1 | 1.007678696  | 0.100623  | 0.261261261 | 0.262094 |
| biological_process | translational initiation                                                            | GO:0006413 | 16469 | 68    | 0.757648004 | 0.999739 | 0.987387387 | -1 | 0.87957616   | 0.957614  | 0.875675676 | -1       |
| biological_process | ATP synthesis coupled electron transport                                            | GO:0042773 | 16514 | 23    | 0.579163481 | 0.999766 | 1           | -1 | 0.449832446  | 0.999998  | 1           | -1       |
| cellular_component | nucleolus                                                                           | GO:0005730 | 16225 | 598   | 0.918355304 | 0.999785 | 0.983783784 | -1 | 0.966524691  | 0.92561   | 0.790990991 | -1       |
| molecular_function | oxidoreductase activity, acting on NAD(P)H                                          | GO:0016651 | 16801 | 60    | 0.73734282  | 0.999792 | 0.882882883 | -1 | 0.608919854  | 1         | 1           | -1       |
| biological_process | intracellular protein transmembrane import                                          | GO:0044743 | 16505 | 32    | 0.639233154 | 0.999799 | 0.996396396 | -1 | 0.678534265  | 0.999192  | 0.87027027  | -1       |
| molecular_function | iron-sulfur cluster binding                                                         | GO:0051536 | 16797 | 64    | 0.736621646 | 0.999872 | 0.987387387 | -1 | 0.759346575  | 0.999583  | 0.915315315 | -1       |
| molecular_function | metal cluster binding                                                               | GO:0051540 | 16797 | 64    | 0.736621646 | 0.999872 | 0.987387387 | -1 | 0.759346575  | 0.999583  | 0.915315315 | -1       |
| biological_process | cell redox homeostasis                                                              | GO:0045454 | 16477 | 60    | 0.727986448 | 0.999872 | 0.989189189 | -1 | 0.920533545  | 0.857728  | 0.715315315 | -1       |
| molecular_function | oxidoreductase activity                                                             | GO:0016491 | 16160 | 701   | 0.921452246 | 0.999883 | 0.810810811 | -1 | 0.886414083  | 1         | 1           | -1       |
| biological_process | tRNA processing                                                                     | GO:0008033 | 16454 | 83    | 0.766243703 | 0.999891 | 0.992792793 | -1 | 0.797970667  | 0.999304  | 0.917171717 | -1       |
| biological_process | cellular metabolic process                                                          | GO:0044237 | 8795  | 7742  | 0.982316238 | 0.999891 | 0.954954955 | -1 | 0.994918867  | 0.855998  | 0.711711712 | -1       |
| cellular_component | cytoplasmic part                                                                    | GO:0044444 | 11421 | 5402  | 0.975654475 | 0.999916 | 0.774774775 | -1 | 0.965555799  | 1         | 1           | -1       |
| molecular_function | translation initiation factor activity                                              | GO:0003743 | 16798 | 63    | 0.722506029 | 0.999934 | 0.965765766 | -1 | 0.882441218  | 0.947305  | 0.812612613 | -1       |
| cellular_component | organelle ribosome                                                                  | GO:0000313 | 16778 | 45    | 0.669673314 | 0.999939 | 0.832432432 | -1 | 0.530150335  | 1         | 1           | -1       |
| cellular_component | mitochondrial ribosome                                                              | GO:0005761 | 16778 | 45    | 0.669673314 | 0.999939 | 0.832432432 | -1 | 0.530150335  | 1         | 1           | -1       |
| biological_process | mRNA metabolic process                                                              | GO:0016071 | 16178 | 359   | 0.882824996 | 0.999949 | 0.940540541 | -1 | 0.991065986  | 0.616609  | 0.598198198 | -1       |
| biological_process | tRNA metabolic process                                                              | GO:0006399 | 16410 | 127   | 0.799916568 | 0.999956 | 0.992792793 | -1 | 0.846457116  | 0.998688  | 0.915315315 | -1       |
| cellular_component | intracellular                                                                       | GO:0005622 | 5618  | 11205 | 0.987453274 | 0.999966 | 0.90990991  | -1 | 0.994449084  | 0.960922  | 0.735135135 | -1       |
| biological_process | oxidative phosphorylation                                                           | GO:0006119 | 16505 | 32    | 0.591461779 | 0.999969 | 1           | -1 | 0.60318482   | 0.99995   | 0.98018018  | -1       |
| biological_process | DNA repair                                                                          | GO:0006281 | 16175 | 362   | 0.876323902 | 0.999981 | 0.965765766 | -1 | 0.97089296   | 0.833994  | 0.711711712 | -1       |
| biological_process | mitochondrial respiratory chain complex assembly                                    | GO:0033108 | 16516 | 21    | 0.476479992 | 0.999984 | 0.971171717 | -1 | 0.560891929  | 0.999756  | 0.882882883 | -1       |
| molecular_function | oxidoreductase activity, acting on a heme group of donors                           | GO:0016675 | 16831 | 30    | 0.549978607 | 0.99999  | 0.90990991  | -1 | 0.506899467  | 0.999999  | 0.879279279 | -1       |
| molecular_function | heme-copper terminal oxidase activity                                               | GO:0015002 | 16830 | 31    | 0.55563796  | 0.999991 | 0.92972973  | -1 | 0.521466811  | 0.999998  | 0.863063063 | -1       |
| cellular_component | proton-transporting two-sector ATPase complex                                       | GO:0016469 | 16771 | 52    | 0.656889321 | 0.999991 | 0.909090909 | -1 | 0.664973015  | 0.999986  | 0.8         | -1       |
| molecular_function | translation factor activity, nucleic acid binding                                   | GO:0008135 | 16767 | 94    | 0.744050424 | 0.999992 | 0.992792793 | -1 | 0.863036411  | 0.98946   | 0.845045045 | -1       |
| biological_process | ribosomal small subunit biogenesis                                                  | GO:0042274 | 16517 | 20    | 0.438536947 | 0.999993 | 0.890090909 | -1 | 0.352280766  | 1         | 1           | -1       |
| molecular_function | nucleic acid binding                                                                | GO:0003676 | 13956 | 2905  | 0.957204898 | 0.999994 | 0.81981982  | -1 | 1.005228665  | 0.295822  | 0.441441441 | -1       |
| molecular_function | cytochrome-c oxidase activity                                                       | GO:0004129 | 16832 | 29    | 0.529180417 | 0.999994 | 0.92972973  | -1 | 0.504628154  | 0.999998  | 0.863063063 | -1       |
| molecular_function | oxidoreductase activity, acting on a heme group of donors, oxygen as acceptor       | GO:0016676 | 16832 | 29    | 0.529180417 | 0.999994 | 0.92972973  | -1 | 0.504628154  | 0.999998  | 0.863063063 | -1       |
| cellular_component | proteasome complex                                                                  | GO:0000502 | 16755 | 68    | 0.689440875 | 0.999996 | 0.990990991 | -1 | 0.737572422  | 0.999914  | 0.828828829 | -1       |
| molecular_function | threonine-type endopeptidase activity                                               | GO:0004298 | 16838 | 23    | 0.459206227 | 0.999997 | 0.969369369 | -1 | 0.470010048  | 0.999995  | 0.875675676 | -1       |
| molecular_function | threonine-type peptidase activity                                                   | GO:0070003 | 16838 | 23    | 0.459206227 | 0.999997 | 0.969369369 | -1 | 0.470010048  | 0.999995  | 0.875675676 | -1       |
| cellular_component | proton-transporting ATP synthase complex, coupling factor F(o)                      | GO:0045263 | 16803 | 20    | 0.417290999 | 0.999997 | 0.920720721 | -1 | 0.477110337  | 0.999975  | 0.809090909 | -1       |
| molecular_function | oxidoreductase activity, acting on NAD(P)H, quinone or similar compound as acceptor | GO:0016655 | 16830 | 31    | 0.519733575 | 0.999998 | 0.924324324 | -1 | 0.360030993  | 1         | 1           | -1       |
| biological_process | mRNA processing                                                                     | GO:0006397 | 16224 | 313   | 0.852039974 | 0.999998 | 0.981981982 | -1 | 0.970199841  | 0.821751  | 0.688288288 | -1       |
| biological_process | energy coupled proton transport, down electrochemical gradient                      | GO:0015985 | 16514 | 23    | 0.450174216 | 0.999998 | 0.904504505 | -1 | 0.486549062  | 0.99999   | 0.837837838 | -1       |
| biological_process | ATP synthesis coupled proton transport                                              | GO:0015986 | 16514 | 23    | 0.450174216 | 0.999998 | 0.904504505 | -1 | 0.486549062  | 0.99999   | 0.837837838 | -1       |
| cellular_component | proteasome core complex                                                             | GO:0005839 | 16802 | 21    | 0.424042978 | 0.999998 | 0.971171717 | -1 | 0.436083607  | 0.999996  | 0.864864865 | -1       |
| molecular_function | molecular_function                                                                  | GO:0003674 | 0     | 16861 | 1           | 1        | 1           | -1 | 1            | 1         | 1           | -1       |
| molecular_function | RNA binding                                                                         | GO:0003723 | 16075 | 786   | 0.860824669 | 1        | 1           | -1 | 0.936609799  | 0.999191  | 0.805405405 | -1       |
| molecular_function | structural constituent of ribosome                                                  | GO:0003735 | 16634 | 227   | 0.465512251 | 1        | 1           | -1 | 0.397087362  | 1         | 1           | -1       |
| molecular_function | NADH dehydrogenase activity                                                         | GO:0003954 | 16835 | 26    | 0.428063374 | 1        | 1           | -1 | 0.328513116  | 1         | 1           | -1       |
| molecular_function | structural molecule activity                                                        | GO:0005198 | 16387 | 474   | 0.805506817 | 1        | 1           | -1 | 0.755545496  | 1         | 1           | -1       |
| molecular_function | NADH dehydrogenase (ubiquinone) activity                                            | GO:0008137 | 16835 | 26    | 0.428063374 | 1        | 1           | -1 | 0            |           |             |          |

|                    |                                                        |            |       |       |             |   |   |    |             |          |             |    |
|--------------------|--------------------------------------------------------|------------|-------|-------|-------------|---|---|----|-------------|----------|-------------|----|
| molecular_function | hydrogen ion transmembrane transporter activity        | GO:0015078 | 16764 | 97    | 0.698769228 | 1 | 1 | -1 | 0.654056938 | 1        | 1           | -1 |
| molecular_function | NADH dehydrogenase (quinone) activity                  | GO:0050136 | 16835 | 26    | 0.428063374 | 1 | 1 | -1 | 0.328513116 | 1        | 1           | -1 |
| biological_process | rRNA processing                                        | GO:0006364 | 16433 | 104   | 0.681144521 | 1 | 1 | -1 | 0.741452218 | 0.999998 | 0.924324324 | -1 |
| biological_process | RNA processing                                         | GO:0006396 | 15995 | 542   | 0.812687691 | 1 | 1 | -1 | 0.902178857 | 0.99997  | 0.830630631 | -1 |
| biological_process | translation                                            | GO:0006412 | 16054 | 483   | 0.689474075 | 1 | 1 | -1 | 0.710768976 | 1        | 1           | -1 |
| biological_process | biological_process                                     | GO:0008150 | 0     | 16537 | 1           | 1 | 1 | -1 | 1           | 1        | 1           | -1 |
| biological_process | RNA splicing                                           | GO:0008380 | 16286 | 251   | 0.795765045 | 1 | 1 | -1 | 0.895750007 | 0.99803  | 0.848648649 | -1 |
| biological_process | gene expression                                        | GO:0010467 | 12690 | 3847  | 0.959191842 | 1 | 1 | -1 | 0.992080108 | 0.834446 | 0.709909991 | -1 |
| biological_process | rRNA metabolic process                                 | GO:0016072 | 16430 | 107   | 0.698685495 | 1 | 1 | -1 | 0.759183015 | 0.999993 | 0.913513514 | -1 |
| biological_process | ribonucleoprotein complex biogenesis                   | GO:0022613 | 16326 | 211   | 0.764228422 | 1 | 1 | -1 | 0.802451593 | 1        | 1           | -1 |
| biological_process | electron transport chain                               | GO:0022900 | 16419 | 118   | 0.660512856 | 1 | 1 | -1 | 0.614662469 | 1        | 1           | -1 |
| biological_process | ncRNA processing                                       | GO:0034470 | 16334 | 203   | 0.759632376 | 1 | 1 | -1 | 0.816584549 | 0.999997 | 0.899099099 | -1 |
| biological_process | ncRNA metabolic process                                | GO:0034660 | 16276 | 261   | 0.788480466 | 1 | 1 | -1 | 0.860192942 | 0.99996  | 0.87027027  | -1 |
| biological_process | ribosome biogenesis                                    | GO:0042254 | 16373 | 164   | 0.709595778 | 1 | 1 | -1 | 0.747630261 | 1        | 1           | -1 |
| cellular_component | cellular_component                                     | GO:0005575 | 0     | 16823 | 1           | 1 | 1 | -1 | 1           | 1        | 1           | -1 |
| cellular_component | spliceosomal complex                                   | GO:0005681 | 16674 | 149   | 0.765857432 | 1 | 1 | -1 | 0.902490376 | 0.980811 | 0.816216216 | -1 |
| cellular_component | mitochondrion                                          | GO:0005739 | 15299 | 1524  | 0.85360386  | 1 | 1 | -1 | 0.82965668  | 1        | 1           | -1 |
| cellular_component | mitochondrial envelope                                 | GO:0005740 | 16310 | 513   | 0.796157222 | 1 | 1 | -1 | 0.786190484 | 1        | 1           | -1 |
| cellular_component | mitochondrial inner membrane                           | GO:0005743 | 16482 | 341   | 0.728334303 | 1 | 1 | -1 | 0.712043505 | 1        | 1           | -1 |
| cellular_component | mitochondrial respiratory chain                        | GO:0005746 | 16769 | 54    | 0.429087425 | 1 | 1 | -1 | 0.377754205 | 1        | 1           | -1 |
| cellular_component | mitochondrial respiratory chain complex I              | GO:0005747 | 16788 | 35    | 0.39387291  | 1 | 1 | -1 | 0.317512568 | 1        | 1           | -1 |
| cellular_component | mitochondrial proton-transporting ATP synthase complex | GO:0005753 | 16801 | 22    | 0.396808885 | 1 | 1 | -1 | 0.406556869 | 0.999999 | 0.868468468 | -1 |
| cellular_component | mitochondrial matrix                                   | GO:0005759 | 16616 | 207   | 0.800306411 | 1 | 1 | -1 | 0.769576198 | 1        | 1           | -1 |
| cellular_component | ribosome                                               | GO:0005840 | 16548 | 275   | 0.509986009 | 1 | 1 | -1 | 0.442312086 | 1        | 1           | -1 |
| cellular_component | large ribosomal subunit                                | GO:0015934 | 16760 | 63    | 0.509333124 | 1 | 1 | -1 | 0.368617593 | 1        | 1           | -1 |
| cellular_component | small ribosomal subunit                                | GO:0015935 | 16754 | 69    | 0.473018441 | 1 | 1 | -1 | 0.343427793 | 1        | 1           | -1 |
| cellular_component | organelle inner membrane                               | GO:0019866 | 16457 | 366   | 0.757761893 | 1 | 1 | -1 | 0.745010131 | 1        | 1           | -1 |
| cellular_component | cytosolic large ribosomal subunit                      | GO:0022625 | 16791 | 32    | 0.397445827 | 1 | 1 | -1 | 0.29076781  | 1        | 1           | -1 |
| cellular_component | cytosolic small ribosomal subunit                      | GO:0022626 | 16751 | 72    | 0.408758211 | 1 | 1 | -1 | 0.303117072 | 1        | 1           | -1 |
| cellular_component | ribonucleoprotein complex                              | GO:0022627 | 16787 | 36    | 0.370103094 | 1 | 1 | -1 | 0.263822987 | 1        | 1           | -1 |
| cellular_component | NADH dehydrogenase complex                             | GO:0030529 | 16189 | 634   | 0.710462077 | 1 | 1 | -1 | 0.745907929 | 1        | 1           | -1 |
| cellular_component | mitochondrial membrane                                 | GO:0030964 | 16788 | 35    | 0.39387291  | 1 | 1 | -1 | 0.317512568 | 1        | 1           | -1 |
| cellular_component | organelle envelope                                     | GO:0031966 | 16337 | 486   | 0.800309708 | 1 | 1 | -1 | 0.788160195 | 1        | 1           | -1 |
| cellular_component | envelope                                               | GO:0031967 | 16036 | 787   | 0.866565202 | 1 | 1 | -1 | 0.877193215 | 1        | 1           | -1 |
| cellular_component | macromolecular complex                                 | GO:0031975 | 16014 | 809   | 0.876294387 | 1 | 1 | -1 | 0.887038947 | 1        | 1           | -1 |
| cellular_component | ribosomal subunit                                      | GO:0032991 | 13154 | 3669  | 0.956064396 | 1 | 1 | -1 | 0.967449972 | 0.999944 | 0.776576577 | -1 |
| cellular_component | mitochondrial part                                     | GO:0044391 | 16693 | 130   | 0.489143977 | 1 | 1 | -1 | 0.354213951 | 1        | 1           | -1 |
| cellular_component | cytosolic part                                         | GO:0044429 | 16158 | 665   | 0.800278586 | 1 | 1 | -1 | 0.786771201 | 1        | 1           | -1 |
| cellular_component | mitochondrial membrane part                            | GO:0044445 | 16665 | 158   | 0.662574767 | 1 | 1 | -1 | 0.632491898 | 1        | 1           | -1 |
| cellular_component | proton-transporting ATP synthase complex               | GO:0044555 | 16686 | 137   | 0.591056369 | 1 | 1 | -1 | 0.588840208 | 1        | 1           | -1 |
| cellular_component | respiratory chain complex I                            | GO:0045259 | 16795 | 28    | 0.43723276  | 1 | 1 | -1 | 0.473868368 | 0.999999 | 0.836036036 | -1 |
| cellular_component | respiratory chain                                      | GO:0045271 | 16788 | 35    | 0.39387291  | 1 | 1 | -1 | 0.317512568 | 1        | 1           | -1 |
| cellular_component |                                                        | GO:0070469 | 16754 | 69    | 0.413601909 | 1 | 1 | -1 | 0.376915169 | 1        | 1           | -1 |
